# Supplementary material
Source: publisher site journal article supplement (https://www.spandidos-publications.com/1356/downloadSupplementary)
Supplement: Supplementary file 1 [file downloadSupplementary]

## Sheet: Genes
Table SI. List of all cancer-associated genes and their co-occurrence in transcription, signaling and metabolism pathways.
Gene symbol	Cancer	Metabolism	Signaling	Transcription
A-GAMMA3'E	no	no	no	transcription
A1BG	cancer	no	no	no
A1CF	no	no	no	transcription
A2M	cancer	no	no	transcription
A2MP1	cancer	no	no	no
A4GALT	no	no	no	transcription
A4GNT	cancer	no	no	no
AAAS	no	no	no	transcription
AACS	no	metabolism	no	no
AADAC	no	metabolism	no	no
AADACL2	no	metabolism	no	no
AADACL4	no	metabolism	no	no
AADAT	no	metabolism	no	transcription
AAMP	cancer	no	no	no
AANAT	cancer	no	no	no
AARS1	no	metabolism	no	no
AARS2	no	metabolism	no	no
AARSD1	no	metabolism	no	no
AASDHPPT	no	metabolism	no	no
AATBC	cancer	no	no	no
AATF	cancer	no	no	transcription
AATK	cancer	no	no	no
ABAT	cancer	no	no	no
ABCA1	cancer	metabolism	no	transcription
ABCA12	cancer	metabolism	no	no
ABCA13	no	metabolism	no	no
ABCA2	no	metabolism	no	transcription
ABCA3	cancer	metabolism	no	no
ABCA4	no	metabolism	no	no
ABCA6	no	no	no	transcription
ABCA7	no	metabolism	no	transcription
ABCA8	cancer	metabolism	no	no
ABCB1	cancer	metabolism	signalling	transcription
ABCB10	no	metabolism	no	transcription
ABCB11	cancer	metabolism	no	transcription
ABCB4	cancer	no	no	transcription
ABCB5	cancer	metabolism	no	no
ABCC1	cancer	no	no	transcription
ABCC10	cancer	no	no	no
ABCC11	cancer	no	no	no
ABCC12	cancer	no	no	no
ABCC2	cancer	metabolism	no	transcription
ABCC3	cancer	metabolism	no	transcription
ABCC4	cancer	no	no	transcription
ABCC5	cancer	no	no	transcription
ABCC6	no	metabolism	no	transcription
ABCC8	cancer	metabolism	no	transcription
ABCD4	no	metabolism	no	no
ABCE1	cancer	no	no	no
ABCF1	cancer	no	no	no
ABCF2	cancer	no	no	no
ABCG1	cancer	metabolism	no	transcription
ABCG2	cancer	metabolism	signalling	transcription
ABCG4	cancer	no	no	no
ABCG5	no	metabolism	no	no
ABCG8	cancer	metabolism	no	no
ABHD10	no	metabolism	no	no
ABHD11	cancer	metabolism	no	no
ABHD11-AS1	cancer	no	signalling	no
ABHD12	no	metabolism	no	no
ABHD14A	no	metabolism	no	no
ABHD14A-ACY1	no	no	no	transcription
ABHD14B	no	metabolism	no	transcription
ABHD16A	no	metabolism	no	no
ABHD16B	cancer	no	no	no
ABHD4	no	metabolism	no	no
ABHD5	cancer	metabolism	no	no
ABHD6	cancer	metabolism	no	no
ABHD8	cancer	metabolism	no	no
ABI1	cancer	no	no	no
ABI2	cancer	no	no	no
ABI3	cancer	no	no	no
ABI3BP	cancer	no	no	no
ABITRAM	no	no	no	transcription
ABL1	cancer	metabolism	signalling	transcription
ABL2	cancer	no	no	no
ABLIM1	cancer	no	no	no
ABLIM2	no	no	no	transcription
ABLIM3	no	no	no	transcription
ABO	cancer	no	no	transcription
ABRA	no	no	signalling	transcription
ABRAXAS1	cancer	no	no	no
ABRAXAS2	no	no	no	transcription
ABT1	no	no	no	transcription
ABT1P1	no	no	no	transcription
ACAA2	no	metabolism	no	no
ACACA	cancer	metabolism	no	transcription
ACACB	cancer	metabolism	no	transcription
ACAD11	no	no	no	transcription
ACAD8	no	metabolism	no	no
ACAD9	no	metabolism	no	no
ACADL	no	metabolism	no	no
ACADM	no	metabolism	no	no
ACADS	no	metabolism	no	no
ACADSB	no	metabolism	no	no
ACADVL	no	metabolism	no	no
ACAP2	cancer	no	no	transcription
ACAT1	cancer	no	no	no
ACAT2	no	metabolism	no	transcription
ACBD3	cancer	metabolism	no	no
ACBD4	no	metabolism	no	no
ACBD5	cancer	no	no	no
ACBD7-DCLRE1CP1	no	no	no	transcription
ACD	cancer	no	no	no
ACE	cancer	metabolism	signalling	transcription
ACE2	cancer	metabolism	signalling	no
ACER2	cancer	no	no	transcription
ACHE	cancer	metabolism	signalling	transcription
ACIN1	cancer	metabolism	no	transcription
ACKR1	cancer	no	no	no
ACKR2	cancer	no	no	no
ACKR3	cancer	no	no	transcription
ACKR4	cancer	no	no	no
ACLY	cancer	metabolism	no	transcription
ACMSD	no	metabolism	no	no
ACO1	cancer	metabolism	no	no
ACO2	cancer	metabolism	no	transcription
ACOD1	no	metabolism	no	transcription
ACOT13	no	no	no	transcription
ACOT8	no	no	no	transcription
ACOX3	cancer	no	no	no
ACOXL	cancer	no	no	no
ACP1	cancer	no	no	no
ACP2	cancer	no	no	no
ACP3	cancer	metabolism	no	no
ACP4	cancer	no	no	no
ACP5	cancer	metabolism	no	no
ACRBP	cancer	no	no	no
ACSBG1	no	metabolism	no	no
ACSBG2	no	metabolism	no	no
ACSF3	no	metabolism	no	no
ACSL1	cancer	metabolism	no	transcription
ACSL3	cancer	metabolism	no	transcription
ACSL4	cancer	metabolism	no	no
ACSL5	cancer	no	no	transcription
ACSL6	no	metabolism	no	no
ACSM1	no	metabolism	no	no
ACSM2A	no	metabolism	no	no
ACSM2B	no	metabolism	no	no
ACSM3	no	metabolism	no	transcription
ACSM4	no	metabolism	no	no
ACSM5	no	metabolism	no	no
ACSS1	no	metabolism	no	no
ACSS2	cancer	metabolism	no	transcription
ACTA1	cancer	no	no	transcription
ACTA2	cancer	metabolism	signalling	transcription
ACTA2-AS1	cancer	no	no	no
ACTB	cancer	metabolism	no	transcription
ACTBL2	cancer	no	no	no
ACTC1	cancer	no	no	transcription
ACTG1	cancer	no	signalling	transcription
ACTG2	cancer	no	no	transcription
ACTL6A	cancer	no	no	transcription
ACTL6B	no	no	no	transcription
ACTL7A	cancer	no	no	no
ACTL8	cancer	no	no	no
ACTN1	cancer	no	signalling	transcription
ACTN2	no	no	no	transcription
ACTN3	cancer	metabolism	no	no
ACTN4	cancer	metabolism	no	transcription
ACTR1A	cancer	no	no	no
ACTR2	cancer	no	signalling	transcription
ACTR3	cancer	no	signalling	transcription
ACTR5	no	no	no	transcription
ACTR6	no	no	no	transcription
ACTR8	no	no	no	transcription
ACTRT1	no	no	no	transcription
ACTRT3	cancer	no	no	no
ACVR1	cancer	no	signalling	transcription
ACVR1B	cancer	no	no	transcription
ACVR1C	cancer	no	no	transcription
ACVR2A	cancer	no	no	transcription
ACVR2B	cancer	no	no	transcription
ACVRL1	cancer	no	signalling	transcription
ACY1	cancer	no	no	transcription
ACYP2	cancer	no	no	no
ADA	cancer	metabolism	no	transcription
ADAM10	cancer	no	signalling	transcription
ADAM11	cancer	no	no	no
ADAM12	cancer	no	signalling	transcription
ADAM15	cancer	no	signalling	no
ADAM17	cancer	metabolism	signalling	transcription
ADAM19	cancer	no	no	no
ADAM2	cancer	no	no	no
ADAM22	cancer	no	no	no
ADAM23	cancer	no	no	no
ADAM28	cancer	no	no	no
ADAM29	cancer	no	no	no
ADAM33	cancer	no	no	no
ADAM8	cancer	no	no	transcription
ADAM9	cancer	no	no	transcription
ADAMDEC1	cancer	no	no	no
ADAMTS1	cancer	no	no	transcription
ADAMTS12	cancer	no	no	no
ADAMTS13	cancer	no	no	no
ADAMTS14	cancer	no	no	no
ADAMTS15	cancer	no	no	no
ADAMTS16	cancer	no	no	no
ADAMTS17	cancer	no	no	transcription
ADAMTS18	cancer	no	no	no
ADAMTS3	no	no	no	transcription
ADAMTS4	cancer	metabolism	no	transcription
ADAMTS5	cancer	metabolism	no	transcription
ADAMTS7	cancer	no	no	no
ADAMTS7P3	cancer	no	no	no
ADAMTS8	cancer	no	no	no
ADAMTS9	cancer	no	no	no
ADAMTS9-AS2	cancer	no	no	no
ADAMTSL1	cancer	metabolism	no	no
ADAMTSL3	cancer	no	no	no
ADAR	cancer	no	no	transcription
ADARB1	cancer	no	no	no
ADAT1	cancer	no	no	no
ADCK1	no	metabolism	no	no
ADCK2	no	metabolism	no	no
ADCK5	no	metabolism	no	no
ADCY1	no	no	no	transcription
ADCY2	cancer	no	signalling	no
ADCY3	no	no	no	transcription
ADCY5	no	metabolism	no	no
ADCY8	no	no	signalling	transcription
ADCY9	cancer	no	no	no
ADCYAP1	cancer	no	no	transcription
ADCYAP1R1	cancer	no	no	no
ADD1	cancer	metabolism	no	transcription
ADD2	cancer	metabolism	no	no
ADD3	no	metabolism	no	no
ADGRB1	cancer	no	no	no
ADGRE1	no	no	no	transcription
ADGRE2	cancer	no	no	no
ADGRE3	no	no	no	transcription
ADGRE5	cancer	metabolism	no	no
ADGRF1	cancer	no	no	transcription
ADGRF5	cancer	no	no	no
ADGRG1	cancer	no	no	transcription
ADGRG2	cancer	no	no	no
ADGRG3	no	no	no	transcription
ADGRL3	cancer	metabolism	no	no
ADGRV1	no	metabolism	no	no
ADH1A	cancer	metabolism	no	transcription
ADH1B	cancer	metabolism	no	no
ADH1C	cancer	metabolism	no	transcription
ADH4	cancer	metabolism	no	no
ADH5	cancer	metabolism	no	transcription
ADH6	cancer	no	no	no
ADH7	cancer	metabolism	no	no
ADHFE1	no	metabolism	no	no
ADI1	cancer	no	no	no
ADIPOQ	cancer	metabolism	signalling	transcription
ADIPOR1	cancer	metabolism	signalling	transcription
ADIPOR2	cancer	metabolism	no	transcription
ADIPQTL4	no	metabolism	no	no
ADIRF	cancer	no	no	transcription
ADK	cancer	no	no	no
ADM	cancer	metabolism	no	no
ADM2	cancer	metabolism	no	no
ADNP	cancer	no	no	transcription
ADNP2	no	no	no	transcription
ADO	cancer	no	no	no
ADORA1	cancer	metabolism	no	no
ADORA2A	cancer	metabolism	no	transcription
ADORA2B	cancer	metabolism	signalling	transcription
ADORA3	cancer	no	signalling	transcription
ADPGK-AS1	cancer	no	no	no
ADRA1A	cancer	no	no	no
ADRA1D	cancer	no	no	no
ADRA2A	cancer	metabolism	signalling	no
ADRA2C	no	no	signalling	no
ADRB1	cancer	metabolism	no	no
ADRB2	cancer	metabolism	signalling	transcription
ADRB3	cancer	metabolism	signalling	transcription
ADRM1	cancer	no	no	transcription
ADSL	cancer	metabolism	no	no
ADSS2	cancer	no	no	no
ADTRP	no	metabolism	no	no
AEBP1	cancer	no	no	transcription
AEBP2	no	no	no	transcription
AEN	cancer	no	no	no
AFAP1	cancer	no	no	no
AFAP1-AS1	cancer	no	no	no
AFAP1L1	cancer	no	no	transcription
AFAP1L2	cancer	no	no	transcription
AFDN	cancer	no	signalling	no
AFF1	no	no	no	transcription
AFF2	no	no	no	transcription
AFF3	cancer	no	no	transcription
AFF4	cancer	no	no	transcription
AFG1L	cancer	no	no	transcription
AFG3L1P	no	no	no	transcription
AFM	cancer	metabolism	no	no
AFMID	no	metabolism	no	no
AFP	cancer	no	no	transcription
AGA	cancer	no	no	no
AGAP2	cancer	no	signalling	transcription
AGAP2-AS1	cancer	no	no	no
AGAP3	cancer	no	no	no
AGBL1	cancer	no	no	no
AGBL2	cancer	no	no	no
AGBL4	cancer	no	no	no
AGER	cancer	metabolism	signalling	transcription
AGGF1	cancer	no	signalling	no
AGK	cancer	metabolism	no	no
AGL	cancer	no	no	no
AGMO	no	metabolism	no	no
AGO1	cancer	no	no	transcription
AGO2	cancer	no	no	transcription
AGPAT1	cancer	metabolism	no	no
AGPAT2	cancer	metabolism	no	no
AGPAT5	no	metabolism	no	no
AGPS	cancer	no	no	no
AGR2	cancer	metabolism	signalling	no
AGR3	cancer	no	no	no
AGRN	cancer	no	no	transcription
AGT	cancer	metabolism	signalling	transcription
AGTR1	cancer	metabolism	signalling	transcription
AGTR2	cancer	metabolism	signalling	transcription
AGXT2	no	metabolism	no	no
AHCTF1	no	no	no	transcription
AHCTF1P1	no	no	no	transcription
AHCY	cancer	no	no	no
AHI1	cancer	no	no	transcription
AHNAK	cancer	no	no	no
AHNAK2	cancer	no	no	no
AHR	cancer	metabolism	signalling	transcription
AHRR	cancer	metabolism	no	transcription
AHSG	cancer	metabolism	signalling	transcription
AICDA	cancer	no	no	transcription
AIF1	cancer	no	no	no
AIFM1	cancer	metabolism	signalling	no
AIFM2	cancer	no	no	no
AIFM3	cancer	no	no	no
AIG1	no	metabolism	no	no
AIM2	cancer	no	no	transcription
AIMP1	cancer	metabolism	no	no
AIMP2	cancer	no	no	no
AIP	cancer	no	signalling	transcription
AIRE	cancer	no	signalling	transcription
AJAP1	cancer	no	no	transcription
AJUBA	cancer	no	no	transcription
AK1	no	metabolism	no	no
AK2	no	metabolism	no	no
AK3	cancer	no	no	no
AK4	no	no	no	transcription
AK6	cancer	metabolism	no	transcription
AK9	no	metabolism	no	no
AKAP1	cancer	no	no	transcription
AKAP10	cancer	no	no	no
AKAP12	cancer	metabolism	no	no
AKAP13	cancer	no	signalling	no
AKAP17A	no	no	no	transcription
AKAP3	cancer	no	no	no
AKAP4	cancer	no	no	no
AKAP5	no	no	signalling	transcription
AKAP6	cancer	no	no	transcription
AKAP7	no	no	no	transcription
AKAP8	cancer	no	no	transcription
AKAP8L	no	no	no	transcription
AKAP9	cancer	no	no	no
AKIP1	cancer	no	no	no
AKIRIN2	no	no	no	transcription
AKNA	cancer	no	no	transcription
AKNAD1	no	metabolism	no	transcription
AKR1A1	no	metabolism	no	no
AKR1B1	cancer	metabolism	no	transcription
AKR1B10	cancer	metabolism	signalling	no
AKR1C1	cancer	metabolism	no	no
AKR1C2	cancer	metabolism	no	no
AKR1C3	cancer	metabolism	signalling	transcription
AKR1C4	cancer	metabolism	no	no
AKR7A2	cancer	no	no	no
AKT1	cancer	metabolism	signalling	transcription
AKT1S1	cancer	no	signalling	no
AKT2	cancer	metabolism	signalling	transcription
AKT3	cancer	metabolism	no	transcription
AKTIP	cancer	no	no	no
ALAD	cancer	no	no	no
ALAS1	no	metabolism	no	transcription
ALAS2	no	metabolism	no	transcription
ALB	cancer	metabolism	no	transcription
ALCAM	cancer	no	no	transcription
ALDH18A1	no	metabolism	no	no
ALDH1A1	cancer	metabolism	signalling	transcription
ALDH1A2	cancer	no	no	transcription
ALDH1A3	cancer	metabolism	no	transcription
ALDH1B1	cancer	metabolism	no	no
ALDH1L1	cancer	metabolism	no	transcription
ALDH1L1-AS2	no	metabolism	no	no
ALDH2	cancer	metabolism	no	no
ALDH3A1	cancer	metabolism	no	no
ALDH3A2	no	metabolism	no	no
ALDH3B1	no	metabolism	no	no
ALDH3B2	no	metabolism	no	no
ALDH5A1	cancer	metabolism	no	no
ALDH6A1	cancer	no	no	no
ALDH7A1	cancer	metabolism	no	no
ALDH7A1P4	cancer	no	no	no
ALDOA	cancer	metabolism	no	transcription
ALDOB	cancer	no	no	no
ALDOC	no	no	no	transcription
ALG3	cancer	no	no	no
ALK	cancer	metabolism	signalling	transcription
ALKBH1	cancer	no	no	no
ALKBH2	cancer	no	no	transcription
ALKBH3	cancer	no	no	no
ALKBH5	cancer	no	no	no
ALKBH7	cancer	no	no	no
ALKBH8	cancer	no	no	no
ALMS1	no	no	no	transcription
ALOX12	cancer	metabolism	no	transcription
ALOX12B	no	no	signalling	no
ALOX15	cancer	metabolism	no	transcription
ALOX15B	cancer	no	no	no
ALOX5	cancer	metabolism	no	transcription
ALOX5AP	cancer	metabolism	no	transcription
ALOXE3	cancer	no	no	no
ALPG	cancer	metabolism	no	no
ALPI	cancer	no	no	no
ALPK1	cancer	no	no	no
ALPL	cancer	metabolism	no	no
ALPP	cancer	no	no	no
ALX1	cancer	no	no	transcription
ALX3	no	no	no	transcription
ALX4	cancer	no	no	transcription
ALYREF	no	metabolism	no	transcription
AMACR	cancer	metabolism	no	transcription
AMBN	no	no	no	transcription
AMBP	cancer	no	no	no
AMBRA1	cancer	no	no	no
AMD1	cancer	no	no	no
AMER1	cancer	no	no	transcription
AMER3	cancer	no	no	no
AMFR	cancer	metabolism	no	no
AMH	cancer	no	no	transcription
AMIGO1	no	no	no	transcription
AMIGO2	cancer	no	no	transcription
AMMECR1	cancer	no	no	no
AMN	no	metabolism	no	no
AMOT	cancer	no	no	no
AMOTL1	cancer	no	no	no
AMOTL2	cancer	no	no	no
AMPD1	no	metabolism	no	no
AMPD2	no	metabolism	no	no
AMPH	cancer	no	no	no
AMT	no	metabolism	no	no
AMTN	no	no	no	transcription
AMY1A	no	metabolism	no	no
AMY1B	no	metabolism	no	no
AMY1C	no	metabolism	no	no
AMY2A	no	metabolism	no	no
AMY2B	no	metabolism	no	no
ANAPC1	cancer	no	no	no
ANAPC11	cancer	no	no	no
ANAPC2	cancer	no	no	no
ANAPC5	no	no	no	transcription
ANAPC7	cancer	no	no	transcription
ANG	cancer	no	no	transcription
ANGPT1	cancer	no	signalling	transcription
ANGPT2	cancer	no	signalling	transcription
ANGPTL1	cancer	no	no	no
ANGPTL2	cancer	no	signalling	no
ANGPTL3	no	metabolism	no	no
ANGPTL4	cancer	metabolism	signalling	transcription
ANGPTL6	cancer	no	no	no
ANGPTL7	cancer	no	no	no
ANGPTL8	cancer	metabolism	no	no
ANHX	no	no	no	transcription
ANK1	cancer	no	no	transcription
ANK2	cancer	no	no	no
ANK3	cancer	no	signalling	no
ANKH	no	metabolism	no	no
ANKHD1	cancer	no	no	transcription
ANKHD1-EIF4EBP3	no	no	no	transcription
ANKK1	no	metabolism	no	no
ANKLE1	cancer	no	no	no
ANKLE2	cancer	no	no	no
ANKRD1	cancer	no	no	transcription
ANKRD11	cancer	no	no	transcription
ANKRD12	no	no	no	transcription
ANKRD16	cancer	no	no	no
ANKRD17	cancer	no	no	transcription
ANKRD18A	cancer	no	no	no
ANKRD18B	cancer	no	no	no
ANKRD2	no	no	signalling	transcription
ANKRD20A4-ANKRD20A20P	no	no	no	transcription
ANKRD28	no	no	signalling	no
ANKRD30A	cancer	no	no	transcription
ANKRD30B	cancer	no	no	no
ANKRD30BP2	cancer	no	no	no
ANKRD33	no	no	no	transcription
ANKRD40CL	cancer	no	no	no
ANKRD45	cancer	no	no	no
ANKRD49	cancer	no	no	transcription
ANKRD6	cancer	no	no	transcription
ANKRD62P1-PARP4P3	no	no	no	transcription
ANKS1A	cancer	no	no	no
ANKS1B	cancer	no	no	no
ANKZF1	cancer	no	no	no
ANLN	cancer	no	no	no
ANO1	cancer	no	no	transcription
ANO5	cancer	no	no	no
ANO7	cancer	no	no	transcription
ANO9	cancer	no	no	no
ANOS1	cancer	no	signalling	no
ANP32A	cancer	no	signalling	transcription
ANP32D	cancer	no	no	no
ANP32E	cancer	no	no	transcription
ANPEP	cancer	metabolism	signalling	transcription
ANTXR1	cancer	no	no	no
ANTXR2	cancer	no	no	no
ANXA1	cancer	metabolism	signalling	no
ANXA10	cancer	no	no	no
ANXA11	cancer	no	no	no
ANXA13	cancer	no	no	no
ANXA2	cancer	metabolism	signalling	transcription
ANXA2P2	no	no	no	transcription
ANXA2R	cancer	no	no	no
ANXA3	cancer	no	no	transcription
ANXA4	cancer	no	no	transcription
ANXA5	cancer	no	no	no
ANXA6	cancer	no	no	transcription
ANXA7	cancer	no	no	transcription
ANXA8	cancer	no	no	no
AOC1	cancer	no	no	no
AOC3	cancer	no	no	no
AOPEP	cancer	no	no	no
AOX1	cancer	metabolism	no	no
AOX3P-AOX2P	no	no	no	transcription
AP1B1	cancer	no	no	transcription
AP1M2	no	no	no	transcription
AP2M1	cancer	no	signalling	no
AP4B1	cancer	no	no	no
APAF1	cancer	no	signalling	no
APBA1	no	metabolism	no	no
APBA2	cancer	no	no	no
APBA3	no	no	no	transcription
APBB1	cancer	no	no	transcription
APBB1IP	cancer	no	signalling	transcription
APBB2	no	no	no	transcription
APBB3	no	no	no	transcription
APC	cancer	no	signalling	transcription
APC2	cancer	no	no	no
APCDD1	cancer	no	signalling	no
APEH	no	metabolism	no	no
APEX1	cancer	no	signalling	transcription
API5	cancer	no	no	transcription
APIP	cancer	metabolism	no	no
APLF	cancer	no	signalling	no
APLN	cancer	metabolism	no	transcription
APLNR	cancer	metabolism	no	no
APLP2	cancer	no	no	transcription
APMAP	cancer	metabolism	no	no
APOA1	cancer	metabolism	no	transcription
APOA2	cancer	metabolism	no	transcription
APOA4	cancer	metabolism	no	transcription
APOA5	no	metabolism	no	transcription
APOB	cancer	metabolism	no	transcription
APOB-ICR	no	no	signalling	no
APOBEC1	cancer	no	no	no
APOBEC3A	cancer	no	no	transcription
APOBEC3A_B	cancer	no	no	no
APOBEC3B	cancer	metabolism	no	transcription
APOBEC3C	cancer	no	no	transcription
APOBEC3F	no	no	no	transcription
APOBEC3G	cancer	no	no	transcription
APOBEC3H	cancer	no	no	transcription
APOBEC4	no	no	no	transcription
APOBR	no	metabolism	no	transcription
APOC1	cancer	metabolism	no	no
APOC1P1	cancer	no	no	no
APOC2	cancer	no	no	transcription
APOC3	cancer	metabolism	no	transcription
APOC4	no	metabolism	no	transcription
APOC4-APOC2	no	no	no	transcription
APOD	cancer	metabolism	no	no
APOE	cancer	metabolism	signalling	transcription
APOF	no	metabolism	no	no
APOH	cancer	metabolism	signalling	no
APOL1	no	metabolism	no	no
APOL3	cancer	no	no	no
APOL6	cancer	no	no	no
APOM	cancer	metabolism	no	transcription
APOO	no	metabolism	no	no
APP	cancer	metabolism	signalling	transcription
APPBP2	cancer	no	no	no
APPL1	cancer	no	signalling	transcription
APPL2	cancer	no	no	transcription
APTX	cancer	no	no	no
AQP1	cancer	no	no	transcription
AQP2	cancer	no	signalling	no
AQP3	cancer	metabolism	signalling	transcription
AQP4	cancer	no	no	no
AQP5	cancer	no	no	transcription
AQP7	no	metabolism	no	no
AQP8	cancer	no	signalling	no
AQP9	cancer	metabolism	no	no
AQR	no	metabolism	no	transcription
AR	cancer	metabolism	signalling	transcription
ARAF	cancer	no	signalling	transcription
ARAP1	cancer	no	no	no
ARAP3	no	no	signalling	no
AREG	cancer	no	signalling	transcription
ARF1	cancer	no	signalling	no
ARF3	cancer	no	no	no
ARF4	cancer	no	signalling	transcription
ARF6	cancer	metabolism	signalling	no
ARFGAP3	cancer	no	no	no
ARFGEF1	cancer	no	no	no
ARFRP1	cancer	no	no	no
ARG1	cancer	metabolism	no	no
ARG2	cancer	metabolism	no	no
ARGFX	no	no	no	transcription
ARGLU1	cancer	no	no	transcription
ARHGAP1	cancer	no	no	no
ARHGAP11A	cancer	no	no	no
ARHGAP11A-SCG5	no	no	no	transcription
ARHGAP12	no	no	signalling	no
ARHGAP15	cancer	no	no	no
ARHGAP17	cancer	no	no	no
ARHGAP18	cancer	no	no	no
ARHGAP19-SLIT1	no	no	no	transcription
ARHGAP22	no	no	no	transcription
ARHGAP23	cancer	no	no	no
ARHGAP24	cancer	no	no	no
ARHGAP27	no	no	signalling	no
ARHGAP27P1-BPTFP1-KPNA2P3	no	no	no	transcription
ARHGAP30	cancer	no	no	no
ARHGAP31	cancer	no	no	no
ARHGAP35	cancer	no	signalling	transcription
ARHGAP36	no	no	signalling	transcription
ARHGAP45	cancer	no	no	no
ARHGAP5	cancer	no	no	no
ARHGAP6	cancer	no	no	no
ARHGAP8	no	no	signalling	no
ARHGAP9	cancer	no	no	transcription
ARHGDIA	cancer	no	no	no
ARHGDIB	cancer	no	signalling	transcription
ARHGEF1	cancer	no	no	no
ARHGEF10L	cancer	no	no	no
ARHGEF11	cancer	no	no	transcription
ARHGEF12	cancer	no	no	no
ARHGEF15	cancer	no	no	no
ARHGEF16	no	no	no	transcription
ARHGEF18	no	no	signalling	transcription
ARHGEF19	cancer	no	no	no
ARHGEF2	cancer	no	signalling	transcription
ARHGEF26	cancer	no	no	no
ARHGEF39	cancer	no	no	no
ARHGEF4	cancer	no	no	no
ARHGEF5	cancer	no	no	transcription
ARHGEF7	cancer	no	signalling	no
ARID1A	cancer	no	signalling	transcription
ARID1B	cancer	no	no	transcription
ARID2	cancer	no	no	transcription
ARID3A	cancer	no	no	transcription
ARID3B	cancer	no	no	transcription
ARID3C	no	no	no	transcription
ARID4A	cancer	no	no	transcription
ARID4B	cancer	no	no	transcription
ARID5A	no	no	no	transcription
ARID5B	no	metabolism	no	transcription
ARIH2	cancer	no	no	transcription
ARL11	cancer	no	no	no
ARL13B	cancer	no	no	no
ARL2	cancer	no	no	no
ARL2-SNX15	no	no	no	transcription
ARL2BP	cancer	metabolism	no	transcription
ARL3	cancer	no	no	no
ARL4C	cancer	no	no	no
ARL6IP1	cancer	no	no	no
ARL6IP5	cancer	no	no	transcription
ARL8B	no	metabolism	no	no
ARLNC1	cancer	no	no	no
ARMC2	cancer	no	no	no
ARMC3	cancer	no	no	no
ARMC8	cancer	no	no	no
ARMCX1	cancer	no	no	no
ARMCX2	cancer	no	no	no
ARMCX3	cancer	no	no	transcription
ARMCX5-GPRASP2	no	no	no	transcription
ARMT1	cancer	no	no	no
ARNT	cancer	metabolism	signalling	transcription
ARNT2	cancer	metabolism	no	transcription
ARNTL	cancer	no	no	transcription
ARNTL2	cancer	no	no	transcription
ARPC1A	cancer	no	no	no
ARPC1B	cancer	no	no	no
ARPC2	cancer	no	no	no
ARPC3	cancer	no	no	no
ARPC4	cancer	no	no	transcription
ARPC4-TTLL3	no	no	no	transcription
ARPC5	cancer	no	no	no
ARPIN	cancer	no	no	no
ARPIN-AP3S2	no	no	no	transcription
ARPP19	cancer	no	no	no
ARR3	no	no	signalling	no
ARRB1	cancer	metabolism	signalling	transcription
ARRB2	cancer	no	signalling	transcription
ARRDC3	cancer	metabolism	no	no
ARRDC4	no	metabolism	no	no
ARSA	no	metabolism	no	no
ARSB	cancer	metabolism	no	no
ARSD	no	metabolism	no	no
ARSF	no	metabolism	no	no
ARSG	no	metabolism	no	no
ARSH	no	metabolism	no	no
ARSJ	no	metabolism	no	no
ARSL	no	metabolism	no	no
ART1	cancer	no	no	no
ART3	cancer	no	no	no
ARTN	cancer	no	no	transcription
ARV1	no	metabolism	no	no
ARVCF	cancer	no	no	no
ARX	cancer	no	no	transcription
AS3MT	cancer	metabolism	no	no
ASAH1	cancer	metabolism	no	transcription
ASAH2	no	no	no	transcription
ASAP1	cancer	no	no	no
ASAP3	cancer	no	no	no
ASB1	no	no	signalling	no
ASB11	no	no	signalling	no
ASB12	no	no	signalling	no
ASB13	no	no	signalling	no
ASB14	no	no	signalling	no
ASB16	no	no	signalling	no
ASB18	no	no	signalling	no
ASB2	no	no	signalling	transcription
ASB3	cancer	no	signalling	no
ASB4	cancer	no	signalling	no
ASB5	no	no	signalling	no
ASB7	cancer	no	no	no
ASB9	cancer	no	no	no
ASCC1	no	no	no	transcription
ASCC2	no	no	no	transcription
ASCC3	cancer	no	no	transcription
ASCL1	cancer	no	no	transcription
ASCL2	cancer	no	no	transcription
ASCL3	no	no	no	transcription
ASCL4	no	no	no	transcription
ASCL5	no	no	no	transcription
ASF1A	cancer	no	no	transcription
ASF1B	cancer	no	no	transcription
ASGR1	cancer	no	no	transcription
ASGR2	cancer	no	no	no
ASH1L	cancer	no	no	transcription
ASH2L	cancer	no	no	transcription
ASIC1	cancer	no	no	no
ASIC2	cancer	no	no	no
ASIP	cancer	metabolism	signalling	no
ASL	cancer	no	no	no
ASMT	cancer	no	no	no
ASNS	cancer	no	no	transcription
ASPH	cancer	no	no	no
ASPM	cancer	no	no	no
ASPN	cancer	no	no	no
ASPSCR1	cancer	no	no	transcription
ASRGL1	cancer	no	no	no
ASS1	cancer	no	no	transcription
ASTL	cancer	no	no	no
ASXL1	no	no	no	transcription
ASXL2	cancer	no	no	transcription
ASXL3	cancer	no	no	transcription
ATAD2	cancer	no	no	transcription
ATAD2B	no	no	no	transcription
ATAD3A	cancer	metabolism	no	no
ATAD3B	cancer	metabolism	no	no
ATAD3C	no	metabolism	no	no
ATAD5	cancer	no	no	no
ATAT1	cancer	no	no	transcription
ATE1	cancer	no	no	transcription
ATF1	cancer	no	no	transcription
ATF1P1	no	no	no	transcription
ATF2	cancer	no	no	transcription
ATF3	cancer	no	signalling	transcription
ATF4	cancer	metabolism	signalling	transcription
ATF4P1	no	no	no	transcription
ATF4P2	no	no	no	transcription
ATF4P3	no	no	no	transcription
ATF4P4	no	no	no	transcription
ATF5	cancer	no	no	transcription
ATF6	cancer	metabolism	no	transcription
ATF6B	cancer	no	no	transcription
ATF7	cancer	no	no	transcription
ATF7-NPFF	no	no	no	transcription
ATF7IP	cancer	no	no	transcription
ATF7IP2	no	no	no	transcription
ATG10	cancer	no	no	no
ATG12	cancer	no	no	transcription
ATG13	cancer	no	no	no
ATG14	no	metabolism	no	no
ATG16L1	cancer	no	no	no
ATG2A	no	metabolism	no	no
ATG2B	cancer	no	no	no
ATG3	cancer	no	no	no
ATG4A	cancer	no	no	no
ATG4B	cancer	no	no	no
ATG4C	cancer	no	no	no
ATG4D	cancer	no	no	no
ATG5	cancer	no	no	transcription
ATG7	cancer	no	no	transcription
ATG9A	cancer	no	no	no
ATM	cancer	metabolism	signalling	transcription
ATMIN	no	no	signalling	transcription
ATN1	no	no	no	transcription
ATOH1	cancer	no	no	transcription
ATOH7	no	no	no	transcription
ATOH8	cancer	no	no	transcription
ATOX1	cancer	no	no	transcription
ATP10A	no	metabolism	no	no
ATP10D	no	metabolism	no	no
ATP11A	cancer	no	no	no
ATP1A3	no	no	no	transcription
ATP1A4	no	no	no	transcription
ATP1B1	cancer	no	no	no
ATP1B2	cancer	no	no	no
ATP1B4	no	no	no	transcription
ATP2A1	no	no	signalling	no
ATP2A2	cancer	no	no	no
ATP2A3	cancer	no	no	transcription
ATP2B1	cancer	no	no	no
ATP2B2	cancer	no	no	no
ATP2B4	cancer	no	signalling	transcription
ATP2C1	cancer	no	no	transcription
ATP2C2	cancer	no	no	no
ATP4A	cancer	no	no	transcription
ATP4B	cancer	no	no	no
ATP5F1A	cancer	metabolism	no	no
ATP5F1B	cancer	metabolism	no	no
ATP5F1E	cancer	no	no	no
ATP5F1EP2	cancer	no	no	no
ATP5IF1	cancer	metabolism	no	transcription
ATP5MD	no	metabolism	no	no
ATP5MF	no	no	no	transcription
ATP5MF-PTCD1	no	no	no	transcription
ATP5PD	cancer	no	no	no
ATP5PF	cancer	no	no	no
ATP6AP2	cancer	metabolism	signalling	transcription
ATP6V0A1	cancer	no	no	no
ATP6V0A2	cancer	no	no	no
ATP6V0A4	cancer	no	no	no
ATP6V0B	cancer	no	no	no
ATP6V0C	cancer	no	no	transcription
ATP6V1A	cancer	no	no	no
ATP6V1C1	cancer	no	no	no
ATP6V1E1	cancer	no	no	no
ATP6V1G2	no	no	no	transcription
ATP6V1G2-DDX39B	no	no	no	transcription
ATP6V1G3	cancer	no	no	no
ATP7A	cancer	metabolism	no	no
ATP7B	cancer	metabolism	no	no
ATP8A1	no	metabolism	no	transcription
ATP8B1	cancer	no	no	transcription
ATP8B4	no	metabolism	no	no
ATP9B	cancer	no	no	no
ATPSCKMT	cancer	no	no	no
ATR	cancer	metabolism	signalling	transcription
ATRIP-TREX1	no	no	no	transcription
ATRN	no	metabolism	no	no
ATRNL1	no	no	no	transcription
ATRX	cancer	no	no	transcription
ATXN1	cancer	no	no	transcription
ATXN1L	no	no	no	transcription
ATXN2	no	no	no	transcription
ATXN2L	no	no	no	transcription
ATXN3	cancer	no	no	transcription
ATXN3L	cancer	no	no	no
ATXN7	no	no	no	transcription
ATXN7L3	cancer	no	no	transcription
AURKA	cancer	no	no	transcription
AURKAIP1	cancer	no	no	no
AURKB	cancer	no	no	transcription
AURKC	cancer	no	no	no
AUTS2	cancer	no	no	transcription
AVEN	cancer	no	signalling	transcription
AVP	cancer	no	signalling	no
AVPI1	cancer	no	no	no
AVPR1A	no	no	signalling	transcription
AVPR2	cancer	no	no	no
AWAT1	no	metabolism	no	no
AWAT2	no	metabolism	no	no
AXIN1	cancer	no	signalling	transcription
AXIN2	cancer	no	signalling	no
AXL	cancer	metabolism	signalling	transcription
AZF1	cancer	no	no	no
AZGP1	cancer	metabolism	no	no
AZIN1	cancer	no	no	no
AZIN2	no	metabolism	no	no
B2M	cancer	metabolism	no	transcription
B3GALNT2	cancer	no	no	transcription
B3GALT4	cancer	no	no	no
B3GALT5	cancer	no	no	transcription
B3GALT5-AS1	cancer	no	no	no
B3GAT1	cancer	no	no	transcription
B3GNT2	cancer	no	no	no
B3GNT3	cancer	no	no	no
B3GNT7	cancer	no	no	no
B3GNT8	cancer	no	no	no
B4GALNT1	cancer	no	no	transcription
B4GALNT2	cancer	no	no	no
B4GALNT3	cancer	no	no	no
B4GALT1	cancer	no	no	transcription
B4GALT2	cancer	no	no	transcription
B4GALT3	cancer	no	no	transcription
B4GALT4	cancer	no	no	no
B4GALT5	cancer	no	no	transcription
B9D2	cancer	no	no	no
BAALC	no	no	no	transcription
BAALC-AS1	cancer	no	no	transcription
BABAM1	cancer	no	no	no
BABAM2	cancer	no	no	transcription
BABAM2-AS1	cancer	no	no	no
BACE1	no	metabolism	signalling	transcription
BACE2	cancer	no	no	no
BACH1	cancer	metabolism	no	transcription
BACH2	cancer	no	signalling	transcription
BAD	cancer	metabolism	no	transcription
BAG1	cancer	metabolism	signalling	transcription
BAG3	cancer	no	no	transcription
BAG4	cancer	no	no	no
BAG5	cancer	no	no	no
BAG6	cancer	no	no	no
BAGE	cancer	no	no	no
BAGE2	cancer	no	no	no
BAGE3	cancer	no	no	no
BAGE4	cancer	no	no	no
BAGE5	cancer	no	no	no
BAHD1	no	no	no	transcription
BAIAP2	cancer	no	signalling	transcription
BAIAP2L1	cancer	no	no	no
BAK1	cancer	no	no	transcription
BAMBI	cancer	no	signalling	transcription
BANCR	cancer	no	no	no
BANF1	no	no	no	transcription
BANP	cancer	no	signalling	transcription
BAP1	cancer	metabolism	no	transcription
BARD1	cancer	metabolism	no	no
BARHL1	no	no	no	transcription
BARHL2	no	no	no	transcription
BARX1	no	no	no	transcription
BARX2	cancer	no	no	transcription
BASP1	cancer	no	no	transcription
BATF	no	no	no	transcription
BATF2	cancer	no	no	transcription
BATF3	no	no	no	transcription
BAX	cancer	no	signalling	transcription
BAZ1A	cancer	no	no	transcription
BAZ1B	cancer	no	no	transcription
BAZ2A	cancer	no	no	transcription
BAZ2B	no	no	no	transcription
BBC3	cancer	metabolism	no	transcription
BBS1	no	no	no	transcription
BBS10	no	no	no	transcription
BBS2	no	no	no	transcription
BBS4	no	no	no	transcription
BBS5	no	no	no	transcription
BBS7	no	no	no	transcription
BBX	no	no	no	transcription
BCAM	cancer	no	no	no
BCAP29	cancer	no	no	no
BCAP31	cancer	metabolism	no	no
BCAR1	cancer	no	no	transcription
BCAR1P1	cancer	no	no	no
BCAR1P2	cancer	no	no	no
BCAR3	cancer	no	no	no
BCAR4	cancer	no	no	transcription
BCAS1	cancer	no	no	no
BCAS2	cancer	no	signalling	no
BCAS3	cancer	no	no	transcription
BCAS4	cancer	no	no	no
BCAT1	cancer	metabolism	no	transcription
BCAT2	cancer	metabolism	no	no
BCCIP	cancer	no	no	no
BCDIN3D	cancer	no	no	no
BCHE	cancer	metabolism	no	no
BCL10	cancer	no	no	transcription
BCL11A	cancer	no	no	transcription
BCL11B	no	no	no	transcription
BCL2	cancer	metabolism	signalling	transcription
BCL2A1	cancer	no	no	transcription
BCL2L1	cancer	no	signalling	transcription
BCL2L10	cancer	no	no	no
BCL2L11	cancer	no	signalling	transcription
BCL2L12	cancer	no	no	transcription
BCL2L14	cancer	no	no	transcription
BCL2L15	cancer	no	no	no
BCL2L2	cancer	no	signalling	transcription
BCL2L2-PABPN1	no	no	no	transcription
BCL3	cancer	metabolism	signalling	transcription
BCL6	cancer	no	signalling	transcription
BCL6B	cancer	no	no	transcription
BCL7A	cancer	no	no	transcription
BCL9	cancer	no	signalling	transcription
BCL9L	cancer	no	signalling	transcription
BCLAF1	cancer	metabolism	no	transcription
BCLAF1P1	no	no	no	transcription
BCLAF1P2	no	no	no	transcription
BCO1	cancer	metabolism	no	no
BCO2	cancer	metabolism	no	no
BCOR	no	no	no	transcription
BCORL1	cancer	no	no	transcription
BCR	cancer	metabolism	signalling	transcription
BCRP1	cancer	no	no	no
BCS1L	no	metabolism	no	no
BCYRN1	cancer	no	no	transcription
BDKRB1	cancer	no	no	no
BDKRB2	cancer	no	no	no
BDNF	cancer	metabolism	signalling	transcription
BDNF-AS	cancer	no	no	no
BDP1	no	no	no	transcription
BDP1P	no	no	no	transcription
BECN1	cancer	metabolism	signalling	transcription
BEND2	no	no	no	transcription
BEND3	no	no	no	transcription
BEND4	cancer	no	no	transcription
BEND5	no	no	no	transcription
BEND6	no	no	no	transcription
BEST1	no	no	no	transcription
BEX1	cancer	no	no	transcription
BEX2	cancer	no	no	transcription
BEX4	no	no	no	transcription
BFSP1	no	metabolism	no	no
BGLAP	cancer	metabolism	no	transcription
BGN	cancer	metabolism	signalling	transcription
BHLHA15	cancer	no	no	transcription
BHLHA9	no	no	no	transcription
BHLHB9	no	no	no	transcription
BHLHE22	no	no	no	transcription
BHLHE23	no	no	no	transcription
BHLHE40	cancer	no	no	transcription
BHLHE41	cancer	no	no	transcription
BHMG1	no	no	no	transcription
BHMT	cancer	metabolism	no	transcription
BHMT2	no	metabolism	no	no
BICC1	cancer	no	no	transcription
BICD1	cancer	no	no	no
BICDL1	no	no	no	transcription
BICRA	cancer	no	no	transcription
BID	cancer	metabolism	no	no
BIK	cancer	no	no	no
BIN1	cancer	metabolism	no	no
BIN2	cancer	no	no	no
BIRC2	cancer	no	signalling	transcription
BIRC3	cancer	no	signalling	transcription
BIRC5	cancer	metabolism	signalling	transcription
BIRC6	cancer	no	no	no
BIRC7	cancer	no	no	no
BIRC8	cancer	no	no	no
BIVM-ERCC5	no	no	no	transcription
BLACAT1	cancer	no	no	no
BLCAP	cancer	no	no	no
BLID	cancer	no	no	no
BLK	no	no	no	transcription
BLM	cancer	no	no	transcription
BLMH	cancer	metabolism	no	no
BLOC1S1	cancer	no	no	no
BLOC1S1-RDH5	no	no	no	transcription
BLOC1S5	no	no	no	transcription
BLOC1S5-TXNDC5	no	no	no	transcription
BLVRA	no	metabolism	no	transcription
BLVRB	cancer	metabolism	no	no
BLZF1	no	no	no	transcription
BMF	cancer	no	no	transcription
BMI1	cancer	no	no	transcription
BMP1	cancer	no	signalling	no
BMP10	cancer	no	no	transcription
BMP15	no	metabolism	signalling	transcription
BMP2	cancer	no	signalling	transcription
BMP3	cancer	no	no	transcription
BMP4	cancer	metabolism	signalling	transcription
BMP5	cancer	no	no	transcription
BMP6	cancer	metabolism	signalling	transcription
BMP7	cancer	no	signalling	transcription
BMP8A	no	no	no	transcription
BMP8B	cancer	no	no	transcription
BMPR1A	cancer	no	signalling	transcription
BMPR1B	cancer	no	signalling	transcription
BMPR2	cancer	metabolism	signalling	transcription
BMS1P2-AGAP9	no	no	no	transcription
BMS1P4-AGAP5	no	no	no	transcription
BMT2	no	metabolism	no	no
BMX	cancer	no	no	transcription
BNC1	no	no	no	transcription
BNC2	cancer	no	no	transcription
BNC2-AS1	cancer	no	no	no
BNIP3	cancer	metabolism	signalling	transcription
BNIP3L	cancer	no	no	no
BOC	cancer	no	no	no
BOD1	cancer	no	no	no
BOK	cancer	no	no	no
BOK-AS1	cancer	no	no	no
BOLA1	no	no	no	transcription
BOLA2-SMG1P6	no	no	no	transcription
BOLL	no	no	no	transcription
BORCS7	cancer	metabolism	no	no
BORCS7-ASMT	no	metabolism	no	transcription
BORCS8-MEF2B	no	no	no	transcription
BPHL	no	metabolism	no	no
BPI	no	metabolism	no	no
BPIFA1	cancer	no	no	transcription
BPIFA4P	cancer	no	no	no
BPIFB1	no	no	signalling	no
BPIFB4	no	no	signalling	no
BPNT1	no	metabolism	no	no
BPTF	cancer	no	no	transcription
BPTFP1	no	no	no	transcription
BRAF	cancer	metabolism	signalling	transcription
BRAP	cancer	no	no	no
BRAT1	cancer	no	signalling	no
BRCA1	cancer	metabolism	signalling	transcription
BRCA2	cancer	no	signalling	transcription
BRCA3	cancer	no	no	no
BRCATA	cancer	no	no	no
BRCC3	cancer	no	no	no
BRCD1	cancer	no	no	no
BRD1	no	no	no	transcription
BRD2	cancer	no	signalling	transcription
BRD3	cancer	no	no	transcription
BRD4	cancer	metabolism	signalling	transcription
BRD7	cancer	no	no	transcription
BRD8	no	no	no	transcription
BRD9	cancer	no	no	no
BRDT	cancer	no	no	transcription
BRF1	cancer	no	no	transcription
BRF2	cancer	no	no	transcription
BRI3	cancer	no	no	no
BRI3BP	cancer	no	no	no
BRICD5	cancer	no	no	no
BRINP1	cancer	no	no	transcription
BRINP3	cancer	no	no	no
BRIP1	cancer	no	no	transcription
BRK1	cancer	no	no	no
BRMS1	cancer	no	no	transcription
BRMS1L	cancer	no	no	transcription
BRPF1	no	no	no	transcription
BRPF3	no	no	no	transcription
BRS3	cancer	metabolism	no	no
BRSK1	cancer	no	no	no
BRSK2	cancer	no	no	no
BRWD1	no	no	no	transcription
BRWD3	cancer	no	no	transcription
BSCL2	no	metabolism	no	transcription
BSG	cancer	metabolism	signalling	transcription
BST1	cancer	no	signalling	no
BST2	cancer	no	signalling	no
BSX	no	no	no	transcription
BTAF1	no	no	no	transcription
BTBD10	no	metabolism	signalling	no
BTBD18	no	no	no	transcription
BTBD7	cancer	no	no	no
BTC	cancer	no	no	no
BTD	cancer	no	no	no
BTF3	cancer	no	no	transcription
BTF3L4	no	no	no	transcription
BTF3L4P1	no	no	no	transcription
BTF3L4P2	no	no	no	transcription
BTF3L4P3	no	no	no	transcription
BTF3L4P4	no	no	no	transcription
BTF3P1	no	no	no	transcription
BTF3P10	no	no	no	transcription
BTF3P11	no	no	no	transcription
BTF3P12	no	no	no	transcription
BTF3P13	no	no	no	transcription
BTF3P14	no	no	no	transcription
BTF3P15	no	no	no	transcription
BTF3P16	no	no	no	transcription
BTF3P2	no	no	no	transcription
BTF3P3	no	no	no	transcription
BTF3P4	no	no	no	transcription
BTF3P5	no	no	no	transcription
BTF3P6	no	no	no	transcription
BTF3P7	no	no	no	transcription
BTF3P8	no	no	no	transcription
BTF3P9	no	no	no	transcription
BTG1	cancer	no	no	transcription
BTG2	cancer	no	no	transcription
BTG3	cancer	no	no	no
BTG4	cancer	no	no	no
BTK	cancer	no	signalling	transcription
BTLA	cancer	no	no	no
BTN2A1	no	metabolism	no	no
BTN2A2	no	metabolism	no	transcription
BTNL2	cancer	no	no	no
BTNL9	no	no	no	transcription
BTRC	cancer	no	no	transcription
BUB1	cancer	no	signalling	transcription
BUB1B	cancer	no	signalling	transcription
BUB1B-PAK6	no	no	no	transcription
BUB3	cancer	no	no	no
BUD13	no	metabolism	no	no
BUD23	cancer	no	no	no
BUD31	no	no	no	transcription
BVES	cancer	no	no	no
BZW1	no	no	no	transcription
C10orf113	cancer	no	no	no
C10orf90	cancer	no	no	no
C10orf95	cancer	no	no	no
C11orf71	cancer	no	no	no
C11orf95	no	no	no	transcription
C12orf40	no	no	no	transcription
C12orf50	no	no	no	transcription
C12orf75	no	no	no	transcription
C14orf39	no	no	no	transcription
C14orf93	cancer	no	no	no
C16orf74	cancer	no	no	no
C16orf78	cancer	no	no	no
C16orf89	no	no	no	transcription
C16orf91	cancer	no	no	no
C17orf113	no	no	no	transcription
C17orf49	cancer	no	no	no
C17orf78	cancer	no	no	no
C17orf80	cancer	no	no	no
C1D	no	no	no	transcription
C1GALT1	cancer	no	no	transcription
C1GALT1C1	cancer	no	no	transcription
C1orf109	cancer	no	no	no
C1orf43	no	no	no	transcription
C1orf61	no	no	no	transcription
C1orf74	cancer	no	no	no
C1QA	cancer	no	signalling	transcription
C1QB	no	no	no	transcription
C1QBP	cancer	metabolism	no	transcription
C1QC	no	metabolism	no	transcription
C1QTNF1	no	metabolism	no	no
C1QTNF12	no	metabolism	no	no
C1QTNF3	cancer	metabolism	signalling	no
C1QTNF3-AMACR	no	no	no	transcription
C1QTNF5	no	metabolism	no	no
C1QTNF6	cancer	metabolism	no	no
C1QTNF9	no	no	no	transcription
C2	cancer	no	no	no
C20orf85	cancer	no	no	no
C22orf31	cancer	no	no	no
C2orf50	cancer	no	no	no
C2orf68	cancer	no	no	no
C3	cancer	metabolism	no	transcription
C3orf33	no	no	no	transcription
C3orf35	no	no	no	transcription
C3orf56	cancer	no	no	no
C3orf85	cancer	no	no	no
C4A	cancer	no	no	no
C4B	cancer	no	no	no
C4BPA	cancer	no	no	no
C4orf46	cancer	no	no	no
C5	cancer	no	no	transcription
C5AR1	cancer	no	signalling	transcription
C5AR2	no	no	signalling	no
C5orf66	cancer	no	no	no
C5orf66-AS1	cancer	no	no	no
C6	no	metabolism	no	no
C6orf89	no	no	signalling	transcription
C7	cancer	metabolism	no	transcription
C7orf66	cancer	no	no	no
C8A	no	metabolism	no	no
C8orf17	cancer	no	no	no
C8orf34	cancer	no	no	no
C8orf37-AS1	cancer	no	no	no
C8orf44-SGK3	no	no	no	transcription
C9	cancer	metabolism	no	no
C9orf72	cancer	metabolism	no	no
CA1	cancer	no	no	no
CA10	cancer	no	no	no
CA11	cancer	no	no	no
CA12	cancer	no	no	no
CA2	cancer	no	no	no
CA3-AS1	cancer	no	no	no
CA4	cancer	no	signalling	no
CA5BP1-CA5B	no	no	no	transcription
CA8	cancer	no	no	transcription
CA9	cancer	no	no	transcription
CAB39L	cancer	no	no	no
CABCOCO1	cancer	no	no	no
CABLES1	cancer	no	no	transcription
CABLES2	cancer	no	no	transcription
CABYR	cancer	no	no	no
CACNA1A	no	no	no	transcription
CACNA1C	cancer	no	no	transcription
CACNA1D	cancer	no	no	no
CACNA1G	cancer	no	no	no
CACNA1H	cancer	no	signalling	no
CACNA1I	cancer	no	no	no
CACNA1S	no	metabolism	signalling	no
CACNA2D1	cancer	no	no	transcription
CACNA2D2	cancer	no	no	no
CACNA2D3	cancer	no	no	no
CACNB3	no	no	no	transcription
CACNB4	cancer	no	no	no
CACTIN	no	no	no	transcription
CACUL1	cancer	no	no	no
CACYBP	cancer	no	no	transcription
CAD	cancer	no	no	no
CADM1	cancer	no	no	transcription
CADM3	cancer	no	no	no
CADM4	cancer	no	no	no
CADPS	cancer	no	no	no
CADPS2	no	no	no	transcription
CAGE1	cancer	no	no	no
CAHM	cancer	no	no	no
CALB1	cancer	no	no	no
CALB2	cancer	no	no	no
CALCA	cancer	metabolism	no	transcription
CALCOCO1	no	no	no	transcription
CALCOCO2	no	no	signalling	transcription
CALCR	cancer	metabolism	no	no
CALCRL	no	no	signalling	no
CALD1	cancer	no	no	no
CALM1	cancer	no	no	transcription
CALM2P1	cancer	no	no	no
CALM3	no	no	signalling	no
CALML3	cancer	no	no	transcription
CALML3-AS1	cancer	no	no	no
CALML4	cancer	no	no	no
CALML5	cancer	no	no	no
CALR	cancer	metabolism	signalling	transcription
CALR3	cancer	no	no	no
CALU	cancer	no	no	transcription
CAMK1	no	no	no	transcription
CAMK1D	cancer	no	no	transcription
CAMK1G	no	no	no	transcription
CAMK2A	cancer	no	no	transcription
CAMK2B	cancer	metabolism	no	transcription
CAMK2D	cancer	no	signalling	transcription
CAMK2G	cancer	no	signalling	no
CAMK2N1	cancer	no	no	no
CAMK4	cancer	metabolism	signalling	transcription
CAMKK1	cancer	no	no	no
CAMKK2	cancer	no	signalling	transcription
CAMKMT	cancer	no	no	transcription
CAMLG	cancer	no	no	transcription
CAMP	cancer	no	signalling	transcription
CAMTA1	cancer	no	no	transcription
CAMTA1-DT	cancer	no	no	no
CAMTA2	no	no	no	transcription
CAND1	cancer	metabolism	no	transcription
CAND2	no	no	no	transcription
CANT1	no	metabolism	no	no
CANX	cancer	no	no	no
CAP1	cancer	no	no	no
CAP2	cancer	no	no	no
CAPG	cancer	no	no	no
CAPN1	cancer	no	no	transcription
CAPN10	cancer	metabolism	no	no
CAPN15	no	no	no	transcription
CAPN2	cancer	no	no	no
CAPN3	no	no	no	transcription
CAPN5	cancer	no	no	no
CAPN6	cancer	no	no	no
CAPN9	cancer	no	no	no
CAPNS1	cancer	no	no	no
CAPRIN1	cancer	no	no	transcription
CAPRIN2	cancer	no	no	transcription
CAPZA1	cancer	no	no	no
CARD10	cancer	no	no	no
CARD11	cancer	no	signalling	transcription
CARD14	no	no	no	transcription
CARD16	no	no	no	transcription
CARD18	cancer	no	no	no
CARD6	no	no	no	transcription
CARD8	cancer	no	no	transcription
CARF	cancer	no	no	transcription
CARHSP1	no	no	no	transcription
CARM1	cancer	metabolism	signalling	transcription
CARMIL2	no	no	signalling	no
CARS1	cancer	no	no	no
CARTPT	no	no	no	transcription
CASC1	cancer	no	no	no
CASC11	cancer	no	no	no
CASC15	cancer	no	no	no
CASC16	cancer	no	no	no
CASC17	cancer	no	no	no
CASC18	cancer	no	no	no
CASC19	cancer	no	no	no
CASC2	cancer	no	no	no
CASC20	cancer	no	no	no
CASC21	cancer	no	no	no
CASC22	cancer	no	no	no
CASC23	cancer	no	no	no
CASC3	cancer	no	no	no
CASC4	cancer	no	no	no
CASC4P1	cancer	no	no	no
CASC6	cancer	no	no	no
CASC8	cancer	no	no	no
CASC9	cancer	metabolism	no	transcription
CASK	no	no	no	transcription
CASP1	cancer	no	no	transcription
CASP10	cancer	no	signalling	no
CASP14	cancer	no	no	no
CASP2	cancer	no	signalling	transcription
CASP3	cancer	metabolism	signalling	transcription
CASP4	cancer	no	no	no
CASP5	cancer	no	no	transcription
CASP6	cancer	no	signalling	no
CASP7	cancer	no	no	transcription
CASP8	cancer	no	signalling	transcription
CASP8AP2	cancer	no	no	transcription
CASP9	cancer	no	no	transcription
CASR	cancer	metabolism	signalling	transcription
CASS4	cancer	no	no	no
CAST	cancer	no	no	transcription
CASTOR3	no	no	no	transcription
CASZ1	no	no	no	transcription
CAT	cancer	no	no	transcription
CATSPER1	no	no	signalling	transcription
CATSPER2	no	no	no	transcription
CATSPER3	cancer	no	no	no
CAV1	cancer	metabolism	signalling	transcription
CAV2	cancer	metabolism	no	no
CAV3	no	metabolism	no	no
CAVIN1	cancer	metabolism	signalling	transcription
CAVIN2	cancer	no	no	no
CAVIN3	cancer	no	no	transcription
CAVIN4	no	no	no	transcription
CBFA2T2	cancer	no	no	transcription
CBFA2T3	cancer	metabolism	no	transcription
CBFB	cancer	no	no	transcription
CBL	cancer	metabolism	signalling	no
CBLB	cancer	no	no	no
CBLC	cancer	metabolism	no	no
CBLL1	cancer	no	no	no
CBLN4	cancer	no	signalling	no
CBR1	cancer	metabolism	no	no
CBR3	cancer	no	no	no
CBR3-AS1	cancer	no	no	no
CBS	cancer	metabolism	no	no
CBX1	cancer	no	signalling	transcription
CBX2	cancer	no	no	transcription
CBX3	cancer	no	no	transcription
CBX4	cancer	no	no	transcription
CBX5	cancer	no	signalling	transcription
CBX6	cancer	no	no	transcription
CBX7	cancer	no	no	transcription
CBX8	cancer	no	no	transcription
CBY1	cancer	metabolism	no	transcription
CBY2	no	no	no	transcription
CC2D1A	cancer	no	no	transcription
CC2D1B	no	no	no	transcription
CCAR1	cancer	no	no	transcription
CCAR2	cancer	metabolism	no	transcription
CCAT1	cancer	no	no	no
CCAT2	cancer	metabolism	no	no
CCBE1	cancer	no	no	no
CCDC106	cancer	no	no	no
CCDC110	cancer	no	no	no
CCDC112	cancer	no	no	no
CCDC115	cancer	no	no	no
CCDC117	cancer	no	no	no
CCDC12	cancer	no	no	no
CCDC134	cancer	no	no	no
CCDC136	no	metabolism	no	no
CCDC141	no	no	no	transcription
CCDC148	no	metabolism	no	no
CCDC169-SOHLH2	no	no	no	transcription
CCDC170	cancer	no	no	no
CCDC178	cancer	no	no	no
CCDC181	cancer	no	no	no
CCDC188	no	no	no	transcription
CCDC22	no	metabolism	no	no
CCDC26	cancer	no	no	no
CCDC33	cancer	no	no	no
CCDC34	cancer	no	no	no
CCDC36	cancer	no	no	no
CCDC43	cancer	no	no	no
CCDC54	cancer	no	no	no
CCDC59	no	no	no	transcription
CCDC6	cancer	no	no	no
CCDC62	cancer	no	no	transcription
CCDC66	cancer	no	no	no
CCDC69	cancer	no	no	no
CCDC7	cancer	no	no	no
CCDC8	cancer	no	signalling	no
CCDC83	cancer	no	no	no
CCDC85B	cancer	no	no	transcription
CCDC88A	cancer	no	signalling	no
CCDC88C	cancer	no	signalling	no
CCEPR	cancer	no	no	no
CCHCR1	cancer	metabolism	no	no
CCK	cancer	no	signalling	transcription
CCKAR	cancer	no	no	no
CCKBR	cancer	metabolism	no	no
CCL1	cancer	no	no	no
CCL11	cancer	no	no	transcription
CCL13	no	no	no	transcription
CCL14	cancer	no	no	no
CCL15	cancer	no	no	transcription
CCL17	cancer	no	signalling	no
CCL18	cancer	no	signalling	transcription
CCL19	cancer	no	no	transcription
CCL2	cancer	metabolism	signalling	transcription
CCL20	cancer	no	no	transcription
CCL21	cancer	no	no	no
CCL22	cancer	no	no	no
CCL23	cancer	no	no	transcription
CCL25	cancer	no	no	transcription
CCL26	cancer	no	no	transcription
CCL27	no	no	signalling	no
CCL28	cancer	no	no	no
CCL3	cancer	no	signalling	transcription
CCL3L1	no	metabolism	signalling	no
CCL4	cancer	no	signalling	transcription
CCL5	cancer	no	signalling	transcription
CCL7	cancer	no	no	no
CCL8	cancer	no	no	no
CCN1	cancer	no	no	transcription
CCN2	cancer	metabolism	signalling	transcription
CCN3	cancer	no	signalling	transcription
CCN4	cancer	metabolism	signalling	no
CCN5	cancer	no	signalling	no
CCN6	cancer	no	no	no
CCNA1	cancer	no	no	transcription
CCNA2	cancer	no	no	transcription
CCNB1	cancer	no	no	transcription
CCNB2	cancer	no	no	no
CCNC	cancer	no	no	transcription
CCND1	cancer	metabolism	signalling	transcription
CCND2	cancer	no	no	transcription
CCND3	cancer	no	no	transcription
CCNDBP1	cancer	no	no	transcription
CCNE1	cancer	metabolism	no	transcription
CCNE2	cancer	no	no	transcription
CCNF	cancer	metabolism	no	no
CCNG1	cancer	no	no	transcription
CCNG2	cancer	no	no	transcription
CCNH	cancer	no	no	transcription
CCNI	cancer	no	no	transcription
CCNJ	cancer	no	no	transcription
CCNJL	no	no	no	transcription
CCNK	cancer	no	no	transcription
CCNL1	cancer	metabolism	no	transcription
CCNL2	no	no	no	transcription
CCNQ	no	no	no	transcription
CCNT1	no	no	no	transcription
CCNT2	no	no	no	transcription
CCNY	cancer	no	no	no
CCP110	cancer	no	no	no
CCPG1	no	no	no	transcription
CCR1	cancer	no	signalling	transcription
CCR10	cancer	no	no	no
CCR2	cancer	no	no	no
CCR3	cancer	no	no	transcription
CCR4	cancer	no	no	no
CCR5	cancer	no	signalling	transcription
CCR6	cancer	no	no	no
CCR7	cancer	no	signalling	transcription
CCR8	cancer	no	no	no
CCR9	cancer	no	no	transcription
CCRL2	cancer	no	no	no
CCSER1	cancer	no	no	no
CCT2	cancer	no	no	no
CCT6A	cancer	no	no	no
CCZ1P-OR7E38P	no	no	no	transcription
CD101	cancer	no	no	no
CD109	cancer	no	signalling	no
CD14	cancer	metabolism	signalling	transcription
CD151	cancer	no	signalling	transcription
CD163	cancer	no	no	no
CD164	cancer	no	no	no
CD177	no	no	no	transcription
CD180	cancer	no	no	transcription
CD19	cancer	no	no	transcription
CD1A	cancer	no	no	transcription
CD1D	cancer	no	signalling	transcription
CD2	cancer	no	no	no
CD200	cancer	no	no	transcription
CD200R1	cancer	no	no	no
CD200R1L	cancer	no	no	no
CD209	cancer	no	signalling	transcription
CD22	cancer	no	no	no
CD226	cancer	no	no	no
CD24	cancer	no	no	transcription
CD244	no	no	signalling	no
CD247	cancer	no	no	transcription
CD248	cancer	no	no	no
CD27	cancer	no	signalling	no
CD274	cancer	metabolism	signalling	transcription
CD276	cancer	metabolism	signalling	no
CD28	cancer	no	signalling	transcription
CD300A	no	no	signalling	no
CD300LF	no	no	signalling	no
CD300LG	cancer	no	no	no
CD302	cancer	no	no	no
CD320	cancer	metabolism	no	no
CD34	cancer	no	no	transcription
CD36	cancer	metabolism	no	transcription
CD37	cancer	no	no	no
CD38	cancer	metabolism	signalling	transcription
CD3D	cancer	no	no	transcription
CD3EAP	cancer	no	no	transcription
CD3G	cancer	no	no	transcription
CD4	cancer	no	signalling	transcription
CD40	cancer	metabolism	signalling	transcription
CD40LG	cancer	no	signalling	transcription
CD44	cancer	metabolism	signalling	transcription
CD46	cancer	no	no	no
CD47	cancer	metabolism	no	transcription
CD48	no	no	signalling	no
CD5	cancer	no	no	transcription
CD55	cancer	no	no	no
CD59	cancer	no	no	no
CD5L	cancer	no	no	no
CD6	no	no	no	transcription
CD63	cancer	no	no	transcription
CD68	cancer	metabolism	no	no
CD69	no	no	signalling	transcription
CD70	cancer	no	signalling	no
CD74	cancer	no	no	transcription
CD79A	cancer	no	no	no
CD79B	no	no	no	transcription
CD80	cancer	no	signalling	transcription
CD81	cancer	no	signalling	transcription
CD82	cancer	no	signalling	transcription
CD83	cancer	no	no	transcription
CD86	cancer	no	signalling	transcription
CD8A	cancer	no	no	transcription
CD8B	no	no	no	transcription
CD9	cancer	no	no	no
CD93	cancer	no	signalling	no
CD99	cancer	no	no	transcription
CDA	cancer	no	no	transcription
CDC14A	cancer	no	no	transcription
CDC14B	cancer	no	no	transcription
CDC16	cancer	no	no	no
CDC20	cancer	no	signalling	no
CDC23	cancer	no	no	no
CDC25A	cancer	no	no	transcription
CDC25B	cancer	no	no	no
CDC25C	cancer	no	no	transcription
CDC27	cancer	no	no	no
CDC37	cancer	no	no	no
CDC40	cancer	no	no	no
CDC42	cancer	no	signalling	transcription
CDC42BPA	cancer	no	signalling	no
CDC42BPB	cancer	no	no	no
CDC42EP1	no	no	signalling	no
CDC42EP2	no	no	signalling	no
CDC42EP3	cancer	no	signalling	no
CDC42EP4	no	no	signalling	no
CDC42EP5	no	no	signalling	no
CDC42SE1	cancer	no	no	no
CDC45	cancer	no	no	transcription
CDC5L	no	no	no	transcription
CDC6	cancer	no	no	transcription
CDC7	cancer	no	no	no
CDC73	cancer	no	no	transcription
CDCA2	cancer	no	no	no
CDCA3	cancer	no	no	transcription
CDCA4	cancer	no	no	transcription
CDCA5	cancer	no	signalling	no
CDCA7	cancer	no	no	transcription
CDCA7L	cancer	no	no	transcription
CDCA8	cancer	no	no	transcription
CDCP1	cancer	no	no	transcription
CDH1	cancer	metabolism	signalling	transcription
CDH10	cancer	no	no	no
CDH11	cancer	no	no	no
CDH12	cancer	no	no	no
CDH13	cancer	metabolism	signalling	transcription
CDH17	cancer	no	signalling	no
CDH19	cancer	no	no	no
CDH2	cancer	no	signalling	transcription
CDH22	cancer	no	no	no
CDH23	cancer	no	no	no
CDH3	cancer	metabolism	no	no
CDH4	cancer	no	no	no
CDH5	cancer	no	signalling	transcription
CDH6	cancer	no	no	transcription
CDH7	cancer	no	no	no
CDH8	cancer	no	no	no
CDH9	cancer	no	no	no
CDHR5	cancer	no	no	transcription
CDIP1	cancer	no	no	no
CDIPT	cancer	metabolism	no	no
CDK1	cancer	no	signalling	transcription
CDK10	cancer	no	no	no
CDK11A	no	no	signalling	transcription
CDK11B	cancer	no	no	transcription
CDK12	cancer	no	no	transcription
CDK13	cancer	no	no	transcription
CDK14	cancer	no	no	no
CDK15	cancer	no	no	no
CDK16	cancer	no	no	no
CDK18	no	no	signalling	no
CDK19	cancer	no	no	transcription
CDK2	cancer	no	signalling	transcription
CDK20	cancer	no	signalling	no
CDK2AP1	cancer	no	no	no
CDK2AP2	cancer	no	no	no
CDK3	cancer	no	no	transcription
CDK4	cancer	metabolism	signalling	transcription
CDK5	cancer	no	signalling	transcription
CDK5R1	cancer	no	no	transcription
CDK5RAP1	cancer	no	no	no
CDK5RAP2	cancer	no	no	transcription
CDK5RAP3	cancer	no	no	transcription
CDK6	cancer	no	signalling	transcription
CDK7	cancer	no	no	transcription
CDK8	cancer	no	no	transcription
CDK9	cancer	no	no	transcription
CDKAL1	cancer	metabolism	no	transcription
CDKL1	cancer	no	no	no
CDKL2	cancer	no	no	no
CDKL5	no	no	signalling	no
CDKN1A	cancer	metabolism	signalling	transcription
CDKN1B	cancer	metabolism	signalling	transcription
CDKN1C	cancer	no	no	transcription
CDKN2A	cancer	no	signalling	transcription
CDKN2AIP	cancer	no	no	no
CDKN2B	cancer	no	no	transcription
CDKN2B-AS1	cancer	metabolism	signalling	transcription
CDKN2C	cancer	no	no	transcription
CDKN2D	cancer	no	no	transcription
CDKN3	cancer	no	no	transcription
CDO1	cancer	no	no	transcription
CDON	cancer	no	no	transcription
CDR1-AS	cancer	no	no	no
CDS1	no	metabolism	no	no
CDS2	no	metabolism	no	no
CDT1	cancer	no	no	transcription
CDV3	no	no	no	transcription
CDX1	cancer	no	no	transcription
CDX2	cancer	no	signalling	transcription
CDX4	no	no	no	transcription
CDY1	no	no	no	transcription
CDY1B	no	no	no	transcription
CDY2A	no	no	no	transcription
CDY2B	no	no	no	transcription
CDYL	no	no	no	transcription
CDYL2	cancer	no	no	transcription
CEACAM1	cancer	metabolism	signalling	transcription
CEACAM19	cancer	no	no	no
CEACAM21	cancer	no	no	no
CEACAM3	cancer	no	signalling	no
CEACAM5	cancer	no	no	no
CEACAM6	cancer	no	no	no
CEACAM7	cancer	no	no	no
CEBPA	cancer	metabolism	no	transcription
CEBPB	cancer	metabolism	signalling	transcription
CEBPD	cancer	no	no	transcription
CEBPE	no	no	no	transcription
CEBPG	no	no	no	transcription
CEBPZ	no	no	no	transcription
CECR2	no	no	no	transcription
CECR7	cancer	no	no	transcription
CEL	cancer	no	no	no
CELA1	cancer	no	no	transcription
CELA2A	cancer	no	no	no
CELA3A	no	metabolism	no	no
CELA3B	cancer	metabolism	no	no
CELF1	cancer	metabolism	no	transcription
CELF2	cancer	no	no	no
CELF3	cancer	no	no	transcription
CELSR2	cancer	no	no	transcription
CEMIP	cancer	metabolism	signalling	no
CEMIP2	cancer	no	no	transcription
CENPA	cancer	no	no	no
CENPB	cancer	no	no	no
CENPC	cancer	no	no	no
CENPE	cancer	no	no	transcription
CENPF	cancer	metabolism	no	transcription
CENPH	cancer	no	no	transcription
CENPI	cancer	no	no	no
CENPJ	no	no	no	transcription
CENPM	no	metabolism	no	no
CENPS	no	no	no	transcription
CENPS-CORT	no	no	no	transcription
CENPT	cancer	no	no	transcription
CENPU	cancer	no	no	no
CENPW	cancer	no	no	transcription
CEP131	no	no	no	transcription
CEP135	cancer	no	no	no
CEP152	cancer	no	no	no
CEP164	no	no	signalling	no
CEP170	no	no	signalling	no
CEP170B	no	no	signalling	no
CEP192	cancer	no	no	no
CEP250	no	no	no	transcription
CEP290	cancer	no	no	transcription
CEP350	cancer	no	no	no
CEP55	cancer	no	no	no
CEP57	cancer	no	no	no
CEP57L1	cancer	no	no	no
CEP63	no	no	no	transcription
CEP70	cancer	no	no	no
CEP72	cancer	no	no	transcription
CEP78	cancer	no	no	no
CEP85L	cancer	no	no	no
CEP89	no	metabolism	no	no
CER1	no	metabolism	no	no
CERK	cancer	no	no	no
CERKL	no	metabolism	no	no
CERNA2	cancer	no	no	no
CERS1	cancer	metabolism	no	no
CERS2	cancer	no	no	transcription
CERS3	no	metabolism	no	transcription
CERS5	cancer	no	no	no
CERS6	cancer	no	no	transcription
CERT1	cancer	no	signalling	no
CES1	cancer	metabolism	no	no
CES1P1	no	metabolism	no	no
CES2	cancer	metabolism	no	no
CES3	no	metabolism	no	no
CES4A	no	metabolism	no	no
CES5A	no	metabolism	no	no
CETN1	cancer	no	no	no
CETN2	no	no	no	transcription
CETN3	no	no	no	transcription
CETP	cancer	metabolism	no	no
CFAP20	no	no	no	transcription
CFAP298	cancer	no	no	transcription
CFAP298-TCP10L	no	no	no	transcription
CFAP45	cancer	no	no	no
CFAP57	cancer	no	no	no
CFAP58	cancer	no	no	no
CFAP74	no	no	no	transcription
CFB	cancer	no	no	no
CFC1	no	no	signalling	no
CFDP1	cancer	no	no	no
CFH	cancer	metabolism	no	no
CFHR4	no	metabolism	no	no
CFI	cancer	metabolism	no	no
CFL1	cancer	no	signalling	no
CFL2	cancer	no	no	no
CFLAR	cancer	metabolism	signalling	transcription
CFTR	cancer	metabolism	signalling	transcription
CGA	cancer	metabolism	no	transcription
CGAS	cancer	no	no	transcription
CGB1	cancer	no	no	transcription
CGB2	cancer	no	no	transcription
CGB3	cancer	no	no	transcription
CGB5	cancer	no	no	transcription
CGGBP1	cancer	no	no	transcription
CGRRF1	cancer	no	no	transcription
CH25H	no	metabolism	no	no
CHAC1	cancer	no	no	transcription
CHAD	no	no	no	transcription
CHAF1A	cancer	no	no	transcription
CHAF1B	cancer	no	no	no
CHAT	no	no	no	transcription
CHCHD10	no	no	no	transcription
CHCHD2	cancer	no	no	transcription
CHCHD3	no	no	no	transcription
CHCHD5	cancer	metabolism	no	no
CHD1	cancer	no	no	transcription
CHD1L	cancer	no	no	no
CHD2	cancer	no	no	transcription
CHD3	cancer	no	no	transcription
CHD4	cancer	no	no	transcription
CHD5	cancer	no	no	transcription
CHD6	no	no	no	transcription
CHD7	cancer	no	no	transcription
CHD8	cancer	no	no	transcription
CHD9	no	no	no	transcription
CHDH	cancer	no	no	no
CHEK1	cancer	no	signalling	transcription
CHEK2	cancer	metabolism	signalling	transcription
CHFR	cancer	no	signalling	no
CHGA	cancer	metabolism	no	transcription
CHGB	no	metabolism	no	transcription
CHI3L1	cancer	metabolism	signalling	no
CHI3L2	cancer	no	no	no
CHID1	cancer	no	no	no
CHIT1	cancer	no	no	no
CHKA	cancer	metabolism	no	transcription
CHKB-CPT1B	no	no	no	transcription
CHL1	cancer	no	no	no
CHM	cancer	no	no	no
CHMP1A	no	no	no	transcription
CHMP1B	no	no	no	transcription
CHMP3	no	no	no	transcription
CHMP4C	cancer	no	no	no
CHMP5	cancer	no	no	no
CHN1	cancer	no	no	no
CHN2	cancer	no	no	no
CHORDC1	cancer	no	no	transcription
CHP1	no	metabolism	no	transcription
CHP2	cancer	no	no	transcription
CHPF	cancer	no	no	no
CHPF2	cancer	no	no	no
CHPT1	cancer	no	no	no
CHRAC1	cancer	no	no	transcription
CHRD	cancer	no	no	no
CHRDL1	cancer	no	no	no
CHRDL2	cancer	no	no	no
CHRFAM7A	no	no	no	transcription
CHRM1	cancer	no	signalling	no
CHRM2	cancer	no	signalling	no
CHRM3	cancer	no	signalling	transcription
CHRNA1	cancer	no	no	transcription
CHRNA2	no	metabolism	no	no
CHRNA3	cancer	no	no	no
CHRNA4	cancer	no	no	transcription
CHRNA5	cancer	no	no	no
CHRNA6	cancer	no	no	no
CHRNA7	cancer	no	no	transcription
CHRNA9	cancer	no	no	no
CHRNB2	no	no	no	transcription
CHRNB3	cancer	no	no	no
CHRNB4	cancer	no	no	transcription
CHROMR	no	metabolism	no	no
CHST11	cancer	no	no	no
CHST2	cancer	no	no	no
CHST4	cancer	no	no	no
CHST5	cancer	no	no	no
CHST6	cancer	metabolism	no	transcription
CHST9	cancer	no	no	no
CHSY1	cancer	no	no	no
CHSY3	cancer	no	no	no
CHTF8	cancer	no	no	no
CHTOP	cancer	no	no	transcription
CHUK	cancer	metabolism	signalling	transcription
CHURC1	no	no	no	transcription
CHURC1-FNTB	no	no	no	transcription
CIAO1	no	no	no	transcription
CIAO2B	no	no	no	transcription
CIAPIN1	cancer	no	no	no
CIART	no	no	no	transcription
CIB1	cancer	no	signalling	transcription
CIB2	cancer	no	no	no
CIBAR1	cancer	no	no	no
CIC	cancer	no	signalling	transcription
CIDEA	cancer	no	no	no
CIDEB	no	no	no	transcription
CIDEC	no	metabolism	no	transcription
CIITA	cancer	no	no	transcription
CILK1	cancer	no	signalling	no
CILP	no	metabolism	no	no
CIP2A	cancer	metabolism	no	transcription
CIPC	no	no	no	transcription
CIR1	cancer	no	no	transcription
CIRBP	cancer	no	no	transcription
CISD1	cancer	no	no	no
CISD2	cancer	no	no	no
CISH	cancer	no	signalling	no
CIT	cancer	no	no	no
CITED1	cancer	no	no	transcription
CITED2	cancer	no	no	transcription
CITED4	cancer	no	no	transcription
CIZ1	cancer	no	no	no
CKAP2	cancer	no	no	transcription
CKAP4	cancer	no	signalling	no
CKAP5	cancer	no	no	no
CKB	cancer	metabolism	no	no
CKLF	no	no	no	transcription
CKLF-CMTM1	no	no	no	transcription
CKMT1A	cancer	no	no	no
CKMT1B	cancer	no	no	no
CKS1B	cancer	no	no	transcription
CKS1BP7	cancer	no	no	no
CKS2	cancer	no	no	transcription
CLASP2	cancer	no	no	no
CLCA1	cancer	no	no	no
CLCA2	cancer	no	no	no
CLCC1	no	metabolism	no	no
CLCF1	cancer	no	signalling	no
CLCN3	cancer	no	no	no
CLCN4	cancer	no	no	no
CLDN1	cancer	no	no	transcription
CLDN10	cancer	no	no	no
CLDN11	cancer	no	no	transcription
CLDN12	cancer	no	no	no
CLDN14	cancer	no	no	no
CLDN16	cancer	no	no	no
CLDN17	cancer	no	no	no
CLDN18	cancer	no	no	no
CLDN2	cancer	no	no	no
CLDN23	cancer	no	no	no
CLDN3	cancer	no	no	transcription
CLDN4	cancer	no	no	transcription
CLDN5	cancer	no	signalling	transcription
CLDN6	cancer	no	no	no
CLDN7	cancer	no	no	no
CLDN8	cancer	no	no	no
CLDND1	cancer	no	no	transcription
CLEC10A	no	no	signalling	no
CLEC12A	cancer	no	no	no
CLEC14A	no	no	signalling	no
CLEC17A	cancer	no	no	no
CLEC1B	cancer	no	no	no
CLEC2B	no	no	signalling	no
CLEC2D	cancer	no	signalling	no
CLEC3B	cancer	no	no	no
CLEC4A	no	no	signalling	no
CLEC4C	no	no	signalling	no
CLEC4D	no	no	signalling	no
CLEC4E	no	no	signalling	no
CLEC4G	no	no	no	transcription
CLEC4M	cancer	no	no	no
CLEC5A	no	no	signalling	no
CLEC6A	cancer	no	signalling	no
CLEC7A	no	metabolism	signalling	no
CLIC1	cancer	no	no	no
CLIC3	cancer	no	no	no
CLIC4	cancer	no	no	transcription
CLIP1	cancer	no	no	no
CLIP3	no	metabolism	no	no
CLK1	no	metabolism	signalling	no
CLK2	cancer	no	no	no
CLK3	cancer	no	no	no
CLMN	cancer	no	no	no
CLMP	cancer	no	no	no
CLN3	no	no	signalling	no
[truncated: 11,008 more rows]

## Sheet: Cancer-associated genes
tax_id	Org_name	GeneID	CurrentID	Status	Symbol	Aliases	Description	other_designations	map_location	chromosome	genomic_nucleotide_accession.version	start_position_on_the_genomic_accession	end_position_on_the_genomic_accession	orientation	exon_count	OMIM
9606	Homo sapiens	672	0	live	BRCA1	BRCAI, BRCC1, BROVCA1, FANCS, IRIS, PNCA4, PPP1R53, PSCP, RNF53	BRCA1 DNA repair associated	breast cancer type 1 susceptibility protein|BRCA1/BRCA2-containing complex, subunit 1|Fanconi anemia, complementation group S|RING finger protein 53|breast and ovarian cancer susceptibility protein 1|breast cancer 1, early onset|early onset breast cancer 1|protein phosphatase 1, regulatory subunit 53	17q21.31	17	NC_000017.11	43044295	43125364	minus	24	113705
9606	Homo sapiens	675	0	live	BRCA2	BRCC2, BROVCA2, FACD, FAD, FAD1, FANCD, FANCD1, GLM3, PNCA2, XRCC11	BRCA2 DNA repair associated	breast cancer type 2 susceptibility protein|BRCA1/BRCA2-containing complex, subunit 2|Fanconi anemia group D1 protein|breast and ovarian cancer susceptibility gene, early onset|breast and ovarian cancer susceptibility protein 2|breast cancer 2 tumor suppressor|breast cancer 2, early onset|mutant BRCA2|truncated breast cancer 2	13q13.1	13	NC_000013.11	32315480	32399672	plus	27	600185
9606	Homo sapiens	100048912	0	live	CDKN2B-AS1	ANRIL, CDKN2B-AS, CDKN2BAS, NCRNA00089, PCAT12, p15AS	CDKN2B antisense RNA 1	CDKN2B antisense RNA 1 (non-protein coding)|antisense noncoding RNA in the INK4 locus|p15 antisense RNA|prostate cancer associated transcript 12	9p21.3	9	NC_000009.12	21994791	22121097	plus	21	613149
9606	Homo sapiens	101805488	0	live	CCAT2	LINC00873, NCCP1	colon cancer associated transcript 2	colon cancer associated transcript 2 (non-protein coding)|long intergenic non-protein coding RNA 873|non-coding RNA involved in cancer predisposition 1	8q24.21	8	NC_000008.11	127400399	127402150	plus	1
9606	Homo sapiens	2099	0	live	ESR1	ER, ESR, ESRA, ESTRR, Era, NR3A1	estrogen receptor 1	estrogen receptor|E2 receptor alpha|ER-alpha|estradiol receptor|estrogen nuclear receptor alpha|estrogen receptor alpha E1-E2-1-2|estrogen receptor alpha E1-N2-E2-1-2|nuclear receptor subfamily 3 group A member 1|oestrogen receptor alpha	6q25.1-q25.2	6	NC_000006.12	151654148	152129619	plus	23	133430
9606	Homo sapiens	3845	0	live	KRAS	'C-K-RAS, C-K-RAS, CFC2, K-RAS2A, K-RAS2B, K-RAS4A, K-RAS4B, K-Ras, K-Ras 2, KI-RAS1, KRAS2, NS, NS3, OES, RALD, RASK2, c-Ki-ras, c-Ki-ras2, KRAS	KRAS proto-oncogene, GTPase	GTPase KRas|K-ras p21 protein|Kirsten rat sarcoma viral oncogene homolog|Kirsten rat sarcoma viral proto-oncogene|PR310 c-K-ras oncogene|c-Kirsten-ras protein|cellular c-Ki-ras2 proto-oncogene|cellular transforming proto-oncogene|oncogene KRAS2|transforming protein p21|v-Ki-ras2 Kirsten rat sarcoma 2 viral oncogene homolog	12p12.1	12	NC_000012.12	25205246	25250929	minus	6	190070
9606	Homo sapiens	1029	0	live	CDKN2A	ARF, CDK4I, CDKN2, CMM2, INK4, INK4A, MLM, MTS-1, MTS1, P14, P14ARF, P16, P16-INK4A, P16INK4, P16INK4A, P19, P19ARF, TP16	cyclin dependent kinase inhibitor 2A	cyclin-dependent kinase inhibitor 2A|CDK4 inhibitor p16-INK4|alternative reading frame|cell cycle negative regulator beta|cyclin-dependent kinase 4 inhibitor A|cyclin-dependent kinase inhibitor 2A (melanoma, p16, inhibits CDK4)|multiple tumor suppressor 1	9p21.3	9	NC_000009.12	21967752	21995324	minus	8	600160
9606	Homo sapiens	7015	0	live	TERT	CMM9, DKCA2, DKCB4, EST2, PFBMFT1, TCS1, TP2, TRT, hEST2, hTRT	telomerase reverse transcriptase	telomerase reverse transcriptase|telomerase catalytic subunit|telomerase-associated protein 2	5p15.33	5	NC_000005.10	1253148	1295068	minus	16	187270
9606	Homo sapiens	999	0	live	CDH1	Arc-1, BCDS1, CD324, CDHE, ECAD, LCAM, UVO	cadherin 1	cadherin-1|CAM 120/80|E-cadherin 1|cadherin 1, E-cadherin (epithelial)|cadherin 1, type 1, E-cadherin (epithelial)|calcium-dependent adhesion protein, epithelial|cell-CAM 120/80|epididymis secretory sperm binding protein|epithelial cadherin|uvomorulin	16q22.1	16	NC_000016.10	68737292	68835537	plus	16	192090
9606	Homo sapiens	4609	0	live	MYC	MRTLC, bHLHe39, c-Myc, MYC	MYC proto-oncogene, bHLH transcription factor	myc proto-oncogene protein|avian myelocytomatosis viral oncogene homolog|class E basic helix-loop-helix protein 39|myc-related translation/localization regulatory factor|proto-oncogene c-Myc|transcription factor p64|v-myc avian myelocytomatosis viral oncogene homolog|v-myc myelocytomatosis viral oncogene homolog	8q24.21	8	NC_000008.11	127735434	127742951	plus	3	190080
9606	Homo sapiens	7157	0	live	TP53	BCC7, BMFS5, LFS1, P53, TRP53	tumor protein p53	cellular tumor antigen p53|antigen NY-CO-13|mutant tumor protein 53|p53 tumor suppressor|phosphoprotein p53|transformation-related protein 53|tumor protein 53|tumor supressor p53	17p13.1	17	NC_000017.11	7668402	7687550	minus	12	191170
9606	Homo sapiens	595	0	live	CCND1	BCL1, D11S287E, PRAD1, U21B31	cyclin D1	G1/S-specific cyclin-D1|B-cell CLL/lymphoma 1|B-cell lymphoma 1 protein|BCL-1 oncogene|PRAD1 oncogene	11q13.3	11	NC_000011.10	69641156	69654474	plus	5	168461
9606	Homo sapiens	4292	0	live	MLH1	COCA2, FCC2, HNPCC, HNPCC2, hMLH1	mutL homolog 1	DNA mismatch repair protein Mlh1|mutL homolog 1, colon cancer, nonpolyposis type 2	3p22.2	3	NC_000003.12	36993350	37050846	plus	21	120436
9606	Homo sapiens	6648	0	live	SOD2	GClnc1, IPO-B, IPOB, MNSOD, MVCD6, Mn-SOD	superoxide dismutase 2	superoxide dismutase [Mn], mitochondrial|Mn superoxide dismutase|epididymis secretory sperm binding protein|gastric cancer-associated lncRNA 1|indophenoloxidase B|manganese-containing superoxide dismutase|mangano-superoxide dismutase|superoxide dismutase 2, mitochondrial	6q25.3	6	NC_000006.12	159669069	159762281	minus	10	147460
9606	Homo sapiens	4582	0	live	MUC1	ADMCKD, ADMCKD1, CA 15-3, CD227, EMA, H23AG, KL-6, MAM6, MCD, MCKD, MCKD1, MUC-1, MUC-1/SEC, MUC-1/X/ZD, PEM, PEMT, PUM, MUC1	mucin 1, cell surface associated	mucin-1|H23 antigen|breast carcinoma-associated antigen DF3|cancer antigen 15-3|carcinoma-associated mucin|episialin|krebs von den Lungen-6|mucin 1, transmembrane|peanut-reactive urinary mucin|polymorphic epithelial mucin|tumor associated epithelial mucin|tumor-associated epithelial membrane antigen	1q22	1	NC_000001.11	155185824	155192915	minus	11	158340
9606	Homo sapiens	9429	0	live	ABCG2	ABC15, ABCP, BCRP, BCRP1, BMDP, CD338, CDw338, EST157481, GOUT1, MRX, MXR, MXR-1, MXR1, UAQTL1	ATP binding cassette subfamily G member 2 (Junior blood group)	broad substrate specificity ATP-binding cassette transporter ABCG2|ABC transporter|ATP-binding cassette transporter G2|ATP-binding cassette, sub-family G (WHITE), member 2 (Junior blood group)|breast cancer resistance protein|mitoxantrone resistance-associated protein|multi drug resistance efflux transport ATP-binding cassette sub-family G (WHITE) member 2|placenta specific MDR protein|placenta-s…	4q22.1	4	NC_000004.12	88090264	88231626	minus	21	603756
9606	Homo sapiens	8626	0	live	TP63	AIS, B(p51A), B(p51B), EEC3, KET, LMS, NBP, OFC8, RHS, SHFM4, TP53CP, TP53L, TP73L, p40, p51, p53CP, p63, p73H, p73L	tumor protein p63	tumor protein 63|amplified in squamous cell carcinoma|chronic ulcerative stomatitis protein|keratinocyte transcription factor KET|transformation-related protein 63|tumor protein p53-competing protein	3q28	3	NC_000003.12	189596746	189897279	plus	17	603273
9606	Homo sapiens	6934	0	live	TCF7L2	TCF-4, TCF4	transcription factor 7 like 2	transcription factor 7-like 2|HMG box transcription factor 4|T-cell factor 4|T-cell-specific transcription factor 4|hTCF-4|transcription factor 7-like 2 (T-cell specific, HMG-box)	10q25.2-q25.3	10	NC_000010.11	112950247	113167678	plus	20	602228
9606	Homo sapiens	101867536	0	live	PRNCR1	CARLo-3, PCAT8	prostate cancer associated non-coding RNA 1	prostate cancer associated transcript 8 (non-protein coding)|prostate cancer non-coding RNA 1	8q24.21	8	NC_000008.11	127079874	127092595	plus	1	615452
9606	Homo sapiens	4436	0	live	MSH2	COCA1, FCC1, HNPCC, HNPCC1, LCFS2, hMSH2	mutS homolog 2	DNA mismatch repair protein Msh2|DNA mismatch repair protein Msh2 transcript|mutS homolog 2, colon cancer, nonpolyposis type 1	2p21-p16.3	2	NC_000002.12	47403067	47634501	plus	22	609309
9606	Homo sapiens	2263	0	live	FGFR2	BBDS, BEK, BFR-1, CD332, CEK3, CFD1, ECT1, JWS, K-SAM, KGFR, TK14, TK25	fibroblast growth factor receptor 2	fibroblast growth factor receptor 2|BEK fibroblast growth factor receptor|bacteria-expressed kinase|keratinocyte growth factor receptor|protein tyrosine kinase, receptor like 14	10q26.13	10	NC_000010.11	121478330	121598458	minus	24	176943
9606	Homo sapiens	2261	0	live	FGFR3	ACH, CD333, CEK2, HSFGFR3EX, JTK4	fibroblast growth factor receptor 3	fibroblast growth factor receptor 3|FGFR-3|fibroblast growth factor receptor 3 variant 4|fibroblast growth factor receptor 3-S|hydroxyaryl-protein kinase|tyrosine kinase JTK4	4p16.3	4	NC_000004.12	1793293	1808872	plus	19	134934
9606	Homo sapiens	7031	0	live	TFF1	BCEI, D21S21, HP1.A, HPS2, pNR-2, pS2	trefoil factor 1	trefoil factor 1|breast cancer estrogen-inducible protein|breast cancer estrogen-inducible sequence|gastrointestinal trefoil protein pS2|polypeptide P1.A|protein pS2	21q22.3	21	NC_000021.9	42362282	42366535	minus	3	113710
9606	Homo sapiens	11200	0	live	CHEK2	CDS1, CHK2, HuCds1, LFS2, PP1425, RAD53, hCds1	checkpoint kinase 2	serine/threonine-protein kinase Chk2|CHK2 checkpoint homolog|cds1 homolog|checkpoint-like protein CHK2	22q12.1	22	NC_000022.11	28687743	28741866	minus	22	604373
9606	Homo sapiens	3123	0	live	HLA-DRB1	DRB1, HLA-DR1B, HLA-DRB, SS1	major histocompatibility complex, class II, DR beta 1	major histocompatibility complex, class II, DR beta 1|major histocompatibility complex, class II, DR beta 1 precursor|HLA class II histocompatibility antigen, DR-1 beta chain|MHC class II HLA-DR beta 1 chain|human leucocyte antigen DRB1|lymphocyte antigen DRB1	6p21.32	6	NC_000006.12	32578769	32589836	minus	6	142857
9606	Homo sapiens	354	0	live	KLK3	APS, KLK2A1, PSA, hK3	kallikrein related peptidase 3	prostate-specific antigen|P-30 antigen|gamma-seminoprotein|kallikrein-3|semenogelase|seminin	19q13.33	19	NC_000019.10	50854915	50860764	plus	5	176820
9606	Homo sapiens	1630	0	live	DCC	CRC18, CRCR1, HGPPS2, IGDCC1, MRMV1, NTN1R1	DCC netrin 1 receptor	netrin receptor DCC|colorectal cancer suppressor|deleted in colorectal carcinoma|immunoglobulin superfamily DCC subclass member 1|putative colorectal tumor suppressor|tumor suppressor protein DCC	18q21.2	18	NC_000018.10	52340172	53535899	plus	32	120470
9606	Homo sapiens	174	0	live	AFP	AFPD, FETA, HPAFP	alpha fetoprotein	alpha-fetoprotein|alpha-1-fetoprotein|alpha-fetoglobulin	4q13.3	4	NC_000004.12	73436221	73456174	plus	15	104150
9606	Homo sapiens	727677	0	live	CASC8	CARLO1, CARLo-1, LINC00860	cancer susceptibility 8	cancer susceptibility 8 (non-protein coding)|cancer susceptibility candidate 8 (non-protein coding)|long intergenic non-protein coding RNA 860	8q24.21	8	NC_000008.11	127289676	127482139	minus	7	617701
9606	Homo sapiens	1326	0	live	MAP3K8	AURA2, COT, EST, ESTF, MEKK8, TPL2, Tpl-2, c-COT	mitogen-activated protein kinase kinase kinase 8	mitogen-activated protein kinase kinase kinase 8|Ewing sarcoma transformant|augmented in rheumatoid arthritis 2|cot (cancer Osaka thyroid) oncogene|proto-oncogene c-Cot|proto-oncogene serine/threoine protein kinase|tumor progression locus 2	10p11.23	10	NC_000010.11	30434021	30461833	plus	12	191195
9606	Homo sapiens	643714	0	live	CASC16	LINC00918	cancer susceptibility 16	cancer susceptibility 16 (non-protein coding)|cancer susceptibility candidate 16 (non-protein coding)|long intergenic non-protein coding RNA 918	16q12.1-q12.2	16	NC_000016.10	52552087	52606975	minus	4
9606	Homo sapiens	94025	0	live	MUC16	CA125	mucin 16, cell surface associated	mucin-16|CA125 ovarian cancer antigen|mucin-16 long isoform|mucin-16 short isoform|ovarian cancer-related tumor marker CA125|ovarian carcinoma antigen CA125	19p13.2	19	NC_000019.10	8848840	9010390	minus	88	606154
9606	Homo sapiens	399948	0	live	COLCA1	C11orf92, CASC12, LOH11CR1F	colorectal cancer associated 1	colorectal cancer-associated protein 1|cancer susceptibility candidate 12	11q23.1	11	NC_000011.10	111293389	111305048	minus	6	615693
9606	Homo sapiens	28	0	live	ABO	A3GALNT, A3GALT1, GTB, NAGAT	ABO, alpha 1-3-N-acetylgalactosaminyltransferase and alpha 1-3-galactosyltransferase	histo-blood group ABO system transferase|ABO blood group (transferase A, alpha 1-3-N-acetylgalactosaminyltransferase; transferase B, alpha 1-3-galactosyltransferase)|B(A) alpha-1,3-galactosyltransferase|histo-blood group A2 transferase	9q34.2	9	NC_000009.12	133250401	133275201	minus	7	110300
9606	Homo sapiens	8202	0	live	NCOA3	ACTR, AIB-1, AIB1, CAGH16, CTG26, KAT13B, RAC3, SRC-3, SRC3, TNRC14, TNRC16, TRAM-1, bHLHe42, pCIP	nuclear receptor coactivator 3	nuclear receptor coactivator 3|CBP-interacting protein|amplified in breast cancer 1 protein|class E basic helix-loop-helix protein 42|receptor-associated coactivator 3|steroid receptor coactivator protein 3|thyroid hormone receptor activator molecule 1	20q13.12	20	NC_000020.11	47501887	47656872	plus	23	601937
9606	Homo sapiens	5290	0	live	PIK3CA	CLAPO, CLOVE, CWS5, MCAP, MCM, MCMTC, PI3K, PI3K-alpha, p110-alpha	phosphatidylinositol-4,5-bisphosphate 3-kinase catalytic subunit alpha	phosphatidylinositol 4,5-bisphosphate 3-kinase catalytic subunit alpha isoform|PI3-kinase p110 subunit alpha|phosphatidylinositol 3-kinase, catalytic, 110-KD, alpha|phosphatidylinositol 3-kinase, catalytic, alpha polypeptide|phosphatidylinositol-4,5-bisphosphate 3-kinase 110 kDa catalytic subunit alpha|phosphatidylinositol-4,5-bisphosphate 3-kinase catalytic subunit, alpha isoform|phosphoinositid…	3q26.32	3	NC_000003.12	179148114	179240093	plus	23	171834
9606	Homo sapiens	6928	0	live	HNF1B	FJHN, HNF-1-beta, HNF-1B, HNF1beta, HNF2, HPC11, LF-B3, LFB3, MODY5, TCF-2, TCF2, VHNF1	HNF1 homeobox B	hepatocyte nuclear factor 1-beta|HNF1 beta A|homeoprotein LFB3|transcription factor 2, hepatic	17q12	17	NC_000017.11	37686431	37745059	minus	11	189907
9606	Homo sapiens	27161	0	live	AGO2	CASC7, EIF2C2, LINC00980, PPD, Q10	argonaute RISC catalytic component 2	protein argonaute-2|PAZ Piwi domain protein|argonaute 2, RISC catalytic component|cancer susceptibility candidate 7|cancer susceptibility candidate 7 (non-protein coding)|eukaryotic translation initiation factor 2C, 2|long intergenic non-protein coding RNA 980|protein slicer	8q24.3	8	NC_000008.11	140520156	140642406	minus	22	606229
9606	Homo sapiens	10273	0	live	STUB1	CHIP, HSPABP2, NY-CO-7, SCA48, SCAR16, SDCCAG7, UBOX1	STIP1 homology and U-box containing protein 1	E3 ubiquitin-protein ligase CHIP|CLL-associated antigen KW-8|RING-type E3 ubiquitin transferase CHIP|STIP1 homology and U-box containing protein 1, E3 ubiquitin protein ligase|antigen NY-CO-7|carboxy terminus of Hsp70-interacting protein|heat shock protein A binding protein 2 (c-terminal)|serologically defined colon cancer antigen 7	16p13.3	16	NC_000016.10	680410	682801	plus	7	607207
9606	Homo sapiens	5744	0	live	PTHLH	BDE2, HHM, PLP, PTHR, PTHRP	parathyroid hormone like hormone	parathyroid hormone-related protein|PTH-rP|PTH-related protein|osteostatin|parathyroid hormone-like hormone preproprotein|parathyroid hormone-like related protein	12p11.22	12	NC_000012.12	27958084	27972864	minus	8	168470
9606	Homo sapiens	4092	0	live	SMAD7	CRCS3, MADH7, MADH8	SMAD family member 7	mothers against decapentaplegic homolog 7|MAD (mothers against decapentaplegic, Drosophila) homolog 7|MAD homolog 8|Mothers against decapentaplegic, drosophila, homolog of, 7|SMAD, mothers against DPP homolog 7|hSMAD7|mothers against DPP homolog 8	18q21.1	18	NC_000018.10	48919853	48950711	minus	5	602932
9606	Homo sapiens	10399	0	live	RACK1	GNB2L1, Gnb2-rs1, H12.3, HLC-7, PIG21	receptor for activated C kinase 1	receptor of activated protein C kinase 1|cell proliferation-inducing gene 21 protein|guanine nucleotide binding protein (G protein), beta polypeptide 2-like 1|guanine nucleotide binding protein beta polypeptide 2-like 1|guanine nucleotide-binding protein subunit beta-2-like 1|guanine nucleotide-binding protein subunit beta-like protein 12.3|human lung cancer oncogene 7 protein|lung cancer oncogen…	5q35.3	5	NC_000005.10	181236897	181243906	minus	8	176981
9606	Homo sapiens	10643	0	live	IGF2BP3	CT98, IMP-3, IMP3, KOC, KOC1, VICKZ3	insulin like growth factor 2 mRNA binding protein 3	insulin-like growth factor 2 mRNA-binding protein 3|IGF-II mRNA-binding protein 3|IGF2 mRNA-binding protein 3|KH domain containing protein overexpressed in cancer|VICKZ family member 3|cancer/testis antigen 98	7p15.3	7	NC_000007.14	23310209	23470674	minus	18	608259
9606	Homo sapiens	120376	0	live	COLCA2	C11orf93, CASC13, LOH11CR1G	colorectal cancer associated 2	colorectal cancer-associated protein 2|cancer susceptibility candidate 13|cancer susceptibility candidate protein 13|colorectal cancer associated two	11q23.1	11	NC_000011.10	111298349	111308735	plus	10	615694
9606	Homo sapiens	4254	0	live	KITLG	DCUA, DFNA69, FPH2, FPHH, KL-1, Kitl, MGF, SCF, SF, SHEP7, SLF	KIT ligand	kit ligand|c-Kit ligand|familial progressive hyperpigmentation 2|mast cell growth factor|steel factor|stem cell factor	12q21.32	12	NC_000012.12	88492793	88580473	minus	10	184745
9606	Homo sapiens	5925	0	live	RB1	OSRC, PPP1R130, RB, p105-Rb, p110-RB1, pRb, pp110	RB transcriptional corepressor 1	retinoblastoma-associated protein|GOS563 exon 17 substitution mutation causes premature stop|exon 17 tumor GOS561 substitution mutation causes premature stop|prepro-retinoblastoma-associated protein|protein phosphatase 1, regulatory subunit 130|retinoblastoma 1|retinoblastoma suspectibility protein	13q14.2	13	NC_000013.11	48303747	48481890	plus	28	614041
9606	Homo sapiens	60528	0	live	ELAC2	COXPD17, ELC2, HPC2	elaC ribonuclease Z 2	zinc phosphodiesterase ELAC protein 2|RNase Z 2|elaC homolog 2|elaC homolog protein 2|elaC-like protein 2|heredity prostate cancer protein 2|putative prostate cancer susceptibility protein HPC2/ELAC2|ribonuclease Z 2|tRNA 3 endonuclease 2|tRNase Z (long form)|tRNase Z 2	17p12	17	NC_000017.11	12991612	13018064	minus	25	605367
9606	Homo sapiens	4194	0	live	MDM4	HDMX, MDMX, MRP1	MDM4 regulator of p53	protein Mdm4|MDM4 protein variant G|MDM4 protein variant Y|MDM4, p53 regulator|MDM4-related protein 1|Mdm4 p53 binding protein homolog|double minute 4, human homolog of; p53-binding protein|mdm2-like p53-binding protein|protein Mdmx	1q32.1	1	NC_000001.11	204516377	204558120	plus	13	602704
9606	Homo sapiens	79728	0	live	PALB2	FANCN, PNCA3	partner and localizer of BRCA2	partner and localizer of BRCA2|mutant partner and localizer of BRCA2|truncated partner and localizer of BRCA2	16p12.2	16	NC_000016.10	23603162	23641337	minus	14	610355
9606	Homo sapiens	1138	0	live	CHRNA5	LNCR2	cholinergic receptor nicotinic alpha 5 subunit	neuronal acetylcholine receptor subunit alpha-5|Cholinergic receptor, neuronal nicotinic, alpha polypeptide-5|acetylcholine receptor, nicotinic, alpha 5 (neuronal)|cholinergic receptor, nicotinic alpha 5|cholinergic receptor, nicotinic, alpha 5 (neuronal)|neuronal nicotinic acetylcholine receptor, alpha5 subunit	15q25.1	15	NC_000015.10	78565520	78595269	plus	6	118505
9606	Homo sapiens	1956	0	live	EGFR	ERBB, ERBB1, HER1, NISBD2, PIG61, mENA	epidermal growth factor receptor	epidermal growth factor receptor|avian erythroblastic leukemia viral (v-erb-b) oncogene homolog|cell growth inhibiting protein 40|cell proliferation-inducing protein 61|epidermal growth factor receptor tyrosine kinase domain|erb-b2 receptor tyrosine kinase 1|proto-oncogene c-ErbB-1|receptor tyrosine-protein kinase erbB-1	7p11.2	7	NC_000007.14	55019017	55211628	plus	31	131550
9606	Homo sapiens	79068	0	live	FTO	ALKBH9, BMIQ14, GDFD	FTO alpha-ketoglutarate dependent dioxygenase	alpha-ketoglutarate-dependent dioxygenase FTO|AlkB homolog 9|U6 small nuclear RNA (2'-O-methyladenosine-N(6)-)-demethylase FTO|U6 small nuclear RNA N(6)-methyladenosine-demethylase FTO|fat mass and obesity associated|fat mass and obesity-associated protein|m6A(m)-demethylase FTO|mRNA (2'-O-methyladenosine-N(6)-)-demethylase FTO|mRNA N(6)-methyladenosine demethylase FTO|tRNA N1-methyl adenine deme…	16q12.2	16	NC_000016.10	53703963	54121941	plus	16	610966
9606	Homo sapiens	23705	0	live	CADM1	BL2, IGSF4, IGSF4A, NECL2, Necl-2, RA175, ST17, SYNCAM, TSLC1, sTSLC-1, sgIGSF, synCAM1	cell adhesion molecule 1	cell adhesion molecule 1|TSLC-1|TSLC1/Nectin-like 2/IGSF4|immunoglobulin superfamily member 4|immunoglobulin superfamily, member 4D variant 1|immunoglobulin superfamily, member 4D variant 2|nectin-like 2|nectin-like protein 2|spermatogenic immunoglobulin superfamily|synaptic cell adhesion molecule|truncated CADM1 protein|tumor suppressor in lung cancer 1	11q23.3	11	NC_000011.10	115169236	115504428	minus	13	605686
9606	Homo sapiens	55107	0	live	ANO1	DOG1, ORAOV2, TAOS2, TMEM16A	anoctamin 1	anoctamin-1|Ca2+-activated Cl- channel|anoctamin 1, calcium activated chloride channel|calcium activated chloride channel|discovered on gastrointestinal stromal tumors protein 1|oral cancer overexpressed 2|transmembrane protein 16A (eight membrane-spanning domains)|tumor-amplified and overexpressed sequence 2	11q13.3	11	NC_000011.10	70078540	70189530	plus	28	610108
9606	Homo sapiens	1915	0	live	EEF1A1	CCS-3, CCS3, EE1A1, EEF-1, EEF1A, EF-Tu, EF1A, GRAF-1EF, HNGC:16303, LENG7, PTI1, eEF1A-1	eukaryotic translation elongation factor 1 alpha 1	elongation factor 1-alpha 1|CTCL tumor antigen|EF-1-alpha-1|EF1a-like protein|cervical cancer suppressor 3|elongation factor 1 alpha subunit|elongation factor Tu|epididymis secretory sperm binding protein|eukaryotic elongation factor 1 A-1|eukaryotic translation elongation factor 1 alpha 1-like 14|glucocorticoid receptor AF-1 specific elongation factor|leukocyte receptor cluster (LRC) member 7|le…	6q13	6	NC_000006.12	73515750	73521032	minus	8	130590
9606	Homo sapiens	1136	0	live	CHRNA3	LNCR2, NACHRA3, PAOD2	cholinergic receptor nicotinic alpha 3 subunit	neuronal acetylcholine receptor subunit alpha-3|cholinergic receptor, nicotinic alpha 3|cholinergic receptor, nicotinic, alpha 3 (neuronal)|cholinergic receptor, nicotinic, alpha polypeptide 3|neuronal nicotinic acetylcholine receptor, alpha3 subunit	15q25.1	15	NC_000015.10	78593052	78620996	minus	9	118503
9606	Homo sapiens	5071	0	live	PRKN	AR-JP, LPRS2, PARK2, PDJ	parkin RBR E3 ubiquitin protein ligase	E3 ubiquitin-protein ligase parkin|Parkinson disease (autosomal recessive, juvenile) 2, parkin|parkinson juvenile disease protein 2|parkinson protein 2 E3 ubiquitin protein ligase|parkinson protein 2, E3 ubiquitin protein ligase (parkin)	6q26	6	NC_000006.12	161347417	162727802	minus	14	602544
9606	Homo sapiens	1277	0	live	COL1A1	EDSARTH1, EDSC, OI1, OI2, OI3, OI4	collagen type I alpha 1 chain	collagen alpha-1(I) chain|alpha-1 type I collagen|alpha1(I) procollagen|collagen alpha 1 chain type I|collagen alpha-1(I) chain preproprotein|collagen of skin, tendon and bone, alpha-1 chain|collagen, type I, alpha 1|pro-alpha-1 collagen type 1|type I proalpha 1|type I procollagen alpha 1 chain	17q21.33	17	NC_000017.11	50184096	50201649	minus	51	120150
9606	Homo sapiens	652995	0	live	UCA1	CUDR, LINC00178, NCRNA00178, UCAT1, onco-lncRNA-36	urothelial cancer associated 1	cancer up-regulated drug resistant|long intergenic non-protein coding RNA 178|urothelial cancer associated 1 (non-protein coding)	19p13.12	19	NC_000019.10	15828947	15836321	plus	3	617500
9606	Homo sapiens	10	0	live	NAT2	AAC2, NAT-2, PNAT	N-acetyltransferase 2	arylamine N-acetyltransferase 2|N-acetyltransferase 2 (arylamine N-acetyltransferase)|N-acetyltransferase type 2|arylamide acetylase 2	8p22	8	NC_000008.11	18386585	18401219	plus	3	612182
9606	Homo sapiens	841	0	live	CASP8	ALPS2B, CAP4, Casp-8, FLICE, MACH, MCH5	caspase 8	caspase-8|FADD-homologous ICE/CED-3-like protease|FADD-like ICE|ICE-like apoptotic protease 5|MACH-alpha-1/2/3 protein|MACH-beta-1/2/3/4 protein|MORT1-associated ced-3 homolog|apoptotic cysteine protease|apoptotic protease Mch-5|caspase 8, apoptosis-related cysteine peptidase|caspase 8, apoptosis-related cysteine protease	2q33.1	2	NC_000002.12	201233443	201287711	plus	15	601763
9606	Homo sapiens	10395	0	live	DLC1	ARHGAP7, HP, STARD12, p122-RhoGAP	DLC1 Rho GTPase activating protein	rho GTPase-activating protein 7|Rho-GTPase-activating protein 7|START domain-containing protein 12|StAR-related lipid transfer (START) domain containing 12|deleted in liver cancer 1 protein|deleted in liver cancer 1 variant 2|deleted in liver cancer variant 4|epididymis secretory sperm binding protein|rho-type GTPase-activating protein 7	8p22	8	NC_000008.11	13083361	13604620	minus	24	604258
9606	Homo sapiens	8000	0	live	PSCA	PRO232	prostate stem cell antigen	prostate stem cell antigen	8q24.3	8	NC_000008.11	142670297	142682725	plus	4	602470
9606	Homo sapiens	7040	0	live	TGFB1	CED, DPD1, IBDIMDE, LAP, TGF-beta1, TGFB, TGFbeta	transforming growth factor beta 1	transforming growth factor beta-1 proprotein|TGF-beta-1|latency-associated peptide|prepro-transforming growth factor beta-1|transforming growth factor beta1	19q13.2	19	NC_000019.10	41330323	41353922	minus	7	190180
9606	Homo sapiens	5820	0	live	PVT1	LINC00079, MIR1204HG, NCRNA00079, onco-lncRNA-100	Pvt1 oncogene	CXCR4/PVT1 fusion|HIST1H2BD/PVT1 fusion|MIR1204, MIR1205, MIR1206 and MIR1207 host|Oncogene PVT-1 (MYC activator)|PVT1/CASC8 fusion|PVT1/CCDC26 fusion|PVT1/IFRD1 fusion|PVT1/IRF2BP2 fusion|PVT1/LINC00824 fusion|PVT1/MYC fusion|PVT1/NFIL3 fusion|PVT1/NSMCE2 fusion|PVT1/SPRY2 fusion|PVT1/UBB fusion|Pvt1 oncogene (non-protein coding)|RP11-89K10/PVT1 fusion|long intergenic non-protein coding RNA 79|p…	8q24.21	8	NC_000008.11	127794533	128101253	plus	9	165140
9606	Homo sapiens	7272	0	live	TTK	CT96, ESK, MPH1, MPS1, MPS1L1, PYT	TTK protein kinase	dual specificity protein kinase TTK|cancer/testis antigen 96|monopolar spindle 1 kinase|monopolar spindle 1-like 1|phosphotyrosine picked threonine kinase|phosphotyrosine picked threonine-protein kinase	6q14.1	6	NC_000006.12	80004147	80042651	plus	23	604092
9606	Homo sapiens	346389	0	live	MACC1	7A5, SH3BP4L	MET transcriptional regulator MACC1	metastasis-associated in colon cancer protein 1|MACC1, MET transcriptional regulator|SH3 domain-containing protein 7a5|metastasis associated in colon cancer 1|putative binding protein 7a5	7p21.1	7	NC_000007.14	20134655	20217384	minus	7	612646
9606	Homo sapiens	3117	0	live	HLA-DQA1	CELIAC1, DQ-A1, DQA1, HLA-DQA	major histocompatibility complex, class II, DQ alpha 1	HLA class II histocompatibility antigen, DQ alpha 1 chain|DC-1 alpha chain|DC-alpha|HLA-DCA|MHC HLA-DQ alpha|MHC class II DQ alpha chain|MHC class II DQA1|MHC class II HLA-DQ-alpha-1|MHC class II antigen DQA1|truncated MHC class II antigen	6p21.32	6	NC_000006.12	32637406	32654846	plus	6	146880
9606	Homo sapiens	10481	0	live	HOXB13	HPC9, PSGD	homeobox B13	homeobox protein Hox-B13	17q21.32	17	NC_000017.11	48724763	48728750	minus	2	604607
9606	Homo sapiens	4925	0	live	NUCB2	HEL-S-109, NEFA	nucleobindin 2	nucleobindin-2|DNA-binding protein NEFA|epididymis secretory protein Li 109|gastric cancer antigen Zg4|nesfatin 1|novel DNA binding/EF-hand/leucine zipper protein|nucleobinding 2|prepronesfatin	11p15.1	11	NC_000011.10	17260337	17349980	plus	23	608020
9606	Homo sapiens	2249	0	live	FGF4	FGF-4, HBGF-4, HST, HST-1, HSTF-1, HSTF1, K-FGF, KFGF	fibroblast growth factor 4	fibroblast growth factor 4|fibroblast growth factor 4 splice isoform|heparin secretory transforming protein 1|heparin-binding growth factor 4|human stomach cancer, transforming factor from FGF-related oncogene|kaposi sarcoma oncogene|oncogene HST|transforming protein KS3	11q13.3	11	NC_000011.10	69771022	69775341	minus	3	164980
9606	Homo sapiens	6623	0	live	SNCG	BCSG1, SR	synuclein gamma	gamma-synuclein|-synuclein|E pound-synuclein|breast cancer-specific gene 1 protein|persyn|synoretin|synuclein, gamma (breast cancer-specific protein 1)	10q23.2	10	NC_000010.11	86955759	86963260	plus	7	602998
9606	Homo sapiens	2064	0	live	ERBB2	CD340, HER-2, HER-2/neu, HER2, MLN 19, NEU, NGL, TKR1	erb-b2 receptor tyrosine kinase 2	receptor tyrosine-protein kinase erbB-2|c-erb B2/neu protein|herstatin|human epidermal growth factor receptor 2|metastatic lymph node gene 19 protein|neuro/glioblastoma derived oncogene homolog|neuroblastoma/glioblastoma derived oncogene homolog|p185erbB2|proto-oncogene Neu|proto-oncogene c-ErbB-2|tyrosine kinase-type cell surface receptor HER2|v-erb-b2 avian erythroblastic leukemia viral oncogen…	17q12	17	NC_000017.11	39688084	39728662	plus	32	164870
9606	Homo sapiens	1485	0	live	CTAG1B	CT6.1, CTAG, CTAG1, ESO1, LAGE-2, LAGE2B, NY-ESO-1	cancer/testis antigen 1B	cancer/testis antigen 1|New York esophageal squamous cell carcinoma 1|autoimmunogenic cancer/testis antigen NY-ESO-1|cancer antigen 3|cancer/testis antigen 6.1|l antigen family member 2	Xq28	X	NC_000023.11	154617609	154619271	minus	3	300156
9606	Homo sapiens	2304	0	live	FOXE1	FKHL15, FOXE2, HFKH4, HFKL5, NMTC4, TITF2, TTF-2, TTF2	forkhead box E1	forkhead box protein E1|HNF-3/fork head-like protein 5|forkhead box protein E2|forkhead, drosophila, homolog-like 15|forkhead-related protein FKHL15|thyroid transcription factor 2	9q22.33	9	NC_000009.12	97853226	97856717	plus	1	602617
9606	Homo sapiens	7048	0	live	TGFBR2	AAT3, FAA3, LDS1B, LDS2, LDS2B, MFS2, RIIC, TAAD2, TBR-ii, TBRII, TGFR-2, TGFbeta-RII	transforming growth factor beta receptor 2	TGF-beta receptor type-2|TGF-beta receptor type IIB|TGF-beta type II receptor|tbetaR-II|transforming growth factor beta receptor II|transforming growth factor beta receptor type IIC|transforming growth factor, beta receptor II (70/80kDa)|transforming growth factor, beta receptor II alpha|transforming growth factor, beta receptor II beta|transforming growth factor, beta receptor II delta|transform…	3p24.1	3	NC_000003.12	30606472	30694142	plus	11	190182
9606	Homo sapiens	9166	0	live	EBAG9	EB9, PDAF	estrogen receptor binding site associated antigen 9	receptor-binding cancer antigen expressed on SiSo cells|cancer-associated surface antigen RCAS1|estrogen receptor-binding fragment-associated gene 9 protein	8q23.2	8	NC_000008.11	109539700	109565996	plus	8	605772
9606	Homo sapiens	57591	0	live	MRTFA	BSAC, MAL, MKL, MKL1, MRTF-A	myocardin related transcription factor A	myocardin-related transcription factor A|MKL/myocardin-like protein 1|basic, SAP and coiled-coil domain|megakaryoblastic leukemia (translocation) 1|megakaryoblastic leukemia 1 protein|megakaryocytic acute leukemia protein	22q13.1-q13.2	22	NC_000022.11	40410289	40636719	minus	16	606078
9606	Homo sapiens	4214	0	live	MAP3K1	MAPKKK1, MEKK, MEKK 1, MEKK1, SRXY6	mitogen-activated protein kinase kinase kinase 1	mitogen-activated protein kinase kinase kinase 1|MAP/ERK kinase kinase 1|MAPK/ERK kinase kinase 1|MEK kinase 1|mitogen-activated protein kinase kinase kinase 1, E3 ubiquitin protein ligase	5q11.2	5	NC_000005.10	56815543	56896152	plus	22	600982
9606	Homo sapiens	25855	0	live	BRMS1		BRMS1 transcriptional repressor and anoikis regulator	breast cancer metastasis-suppressor 1|breast cancer metastasis suppressor 1	11q13.2	11	NC_000011.10	66337333	66345125	minus	9	606259
9606	Homo sapiens	50652	0	live	PCA3	DD3, NCRNA00019, PCAT3, PRUNE2-AS1	prostate cancer associated 3	PRUNE2 antisense RNA 1|prostate cancer antigen 3 (non-protein coding)|prostate cancer associated 3 (non-protein coding)|prostate cancer associated transcript 3 (non-protein coding)|prostate-specific gene DD3	9q21.2	9	NC_000009.12	76764436	76787569	plus	4	604845
9606	Homo sapiens	22974	0	live	TPX2	C20orf1, C20orf2, DIL-2, DIL2, FLS353, GD:C20orf1, HCA519, HCTP4, REPP86, p100	TPX2 microtubule nucleation factor	targeting protein for Xklp2|TPX2, microtubule-associated protein homolog|TPX2, microtubule-associated, homolog|differentially expressed in cancerous and non-cancerous lung cells 2|differentially expressed in lung cells|hepatocellular carcinoma-associated antigen 519|hepatocellular carcinoma-associated antigen 90|preferentially expressed in colorectal cancer|protein fls353|restricted expression pr…	20q11.21	20	NC_000020.11	31739248	31801802	plus	18	605917
9606	Homo sapiens	367	0	live	AR	AIS8, DHTR, HUMARA, HYSP1, KD, NR3C4, SBMA, SMAX1, TFM, AR	androgen receptor	androgen receptor|dihydrotestosterone receptor|nuclear receptor subfamily 3 group C member 4	Xq12	X	NC_000023.11	67544021	67730619	plus	11	313700
9606	Homo sapiens	1401	0	live	CRP	PTX1	C-reactive protein	C-reactive protein|C-reactive protein, pentraxin-related|pentraxin 1	1q23.2	1	NC_000001.11	159712289	159714589	minus	4	123260
9606	Homo sapiens	207	0	live	AKT1	AKT, CWS6, PKB, PKB-ALPHA, PRKBA, RAC, RAC-ALPHA	AKT serine/threonine kinase 1	RAC-alpha serine/threonine-protein kinase|AKT1m|PKB alpha|RAC-PK-alpha|protein kinase B alpha|proto-oncogene c-Akt|rac protein kinase alpha|serine-threonine protein kinase|v-akt murine thymoma viral oncogene homolog 1|v-akt murine thymoma viral oncogene-like protein 1	14q32.33	14	NC_000014.9	104769349	104795748	minus	14	164730
9606	Homo sapiens	2524	0	live	FUT2	B12QTL1, SE, SEC2, Se2, sej	fucosyltransferase 2	galactoside 2-alpha-L-fucosyltransferase 2|GDP-L-fucose:beta-D-galactoside 2-alpha-L-fucosyltransferase 2|alpha (1,2) fucosyltransferase|alpha(1,2)FT 2|alpha(1,2)FT2|fucosyltransferase 2 (secretor status included)|galactoside 2-L-fucosyltransferase|secretor blood group alpha-2-fucosyltransferase|secretor factor	19q13.33	19	NC_000019.10	48695971	48705951	plus	2	182100
9606	Homo sapiens	1143	0	live	CHRNB4		cholinergic receptor nicotinic beta 4 subunit	neuronal acetylcholine receptor subunit beta-4|acetylcholine receptor, nicotinic, beta 4 (neuronal)|cholinergic receptor, nicotinic, beta 4 (neuronal)|cholinergic receptor, nicotinic, beta polypeptide 4|neuronal nicotinic receptor beta 4 subunit	15q25.1	15	NC_000015.10	78623282	78655586	minus	15	118509
9606	Homo sapiens	673	0	live	BRAF	B-RAF1, B-raf1, NS7, RAFB1, BRAF	B-Raf proto-oncogene, serine/threonine kinase	serine/threonine-protein kinase B-raf|94 kDa B-raf protein|B-Raf proto-oncogene serine/threonine-protein kinase (p94)|B-Raf serine/threonine-protein|murine sarcoma viral (v-raf) oncogene homolog B1|proto-oncogene B-Raf|v-raf murine sarcoma viral oncogene homolog B|v-raf murine sarcoma viral oncogene homolog B1	7q34	7	NC_000007.14	140719331	140924929	minus	21	164757
9606	Homo sapiens	10765	0	live	KDM5B	CT31, JARID1B, MRT65, PLU-1, PLU1, PPP1R98, PUT1, RBBP2H1A, RBP2-H1	lysine demethylase 5B	lysine-specific demethylase 5B|cancer/testis antigen 31|histone demethylase JARID1B|jumonji, AT rich interactive domain 1B|jumonji/ARID domain-containing protein 1B|lysine (K)-specific demethylase 5B|protein phosphatase 1, regulatory subunit 98|putative DNA/chromatin binding motif|retinoblastoma-binding protein 2 homolog 1|retinoblastoma-binding protein 2, homolog 1A	1q32.1	1	NC_000001.11	202724495	202809470	minus	30	605393
9606	Homo sapiens	55937	0	live	APOM	G3a, HSPC336, NG20, apo-M	apolipoprotein M	apolipoprotein M|NG20-like protein|alternative name: G3a, NG20|protein G3a	6p21.33	6	NC_000006.12	31652404	31658210	plus	7	606907
9606	Homo sapiens	4477	0	live	MSMB	HPC13, IGBF, MSP, MSPB, PN44, PRPS, PSP, PSP-94, PSP57, PSP94	microseminoprotein beta	beta-microseminoprotein|immunoglobulin binding factor|prostate secreted seminal plasma protein|prostate secretory protein of 94 amino acids|seminal plasma beta-inhibin	10q11.22	10	NC_000010.11	46033305	46046269	minus	4	157145
9606	Homo sapiens	10403	0	live	NDC80	HEC, HEC1, HsHec1, KNTC2, TID3, hsNDC80	NDC80 kinetochore complex component	kinetochore protein NDC80 homolog|NDC80 homolog, kinetochore complex component|NDC80 kinetochore complex component homolog|highly expressed in cancer protein|highly expressed in cancer, rich in leucine heptad repeats|kinetochore associated 2|kinetochore protein Hec1|kinetochore-associated protein 2|retinoblastoma-associated protein HEC	18p11.32	18	NC_000018.10	2571557	2616635	plus	17	607272
9606	Homo sapiens	3553	0	live	IL1B	IL-1, IL1-BETA, IL1F2, IL1beta	interleukin 1 beta	interleukin-1 beta|IL-1 beta|catabolin|interleukin 1beta|preinterleukin 1 beta|pro-interleukin-1-beta	2q14.1	2	NC_000002.12	112829751	112836843	minus	7	147720
9606	Homo sapiens	226	0	live	ALDOA	ALDA, GSD12, HEL-S-87p	aldolase, fructose-bisphosphate A	fructose-bisphosphate aldolase A|aldolase A, fructose-bisphosphate|epididymis secretory sperm binding protein Li 87p|fructose-1,6-bisphosphate triosephosphate-lyase|lung cancer antigen NY-LU-1|muscle-type aldolase	16p11.2	16	NC_000016.10	30064279	30072207	plus	11	103850
9606	Homo sapiens	3598	0	live	IL13RA2	CD213A2, CT19, IL-13R, IL13BP	interleukin 13 receptor subunit alpha 2	interleukin-13 receptor subunit alpha-2|IL-13 receptor subunit alpha-2|IL-13R subunit alpha-2|IL-13R-alpha-2|IL-13RA2|cancer/testis antigen 19|interleukin 13 binding protein|interleukin 13 receptor alpha 2 chain|interleukin 13 receptor, alpha 2	Xq23	X	NC_000023.11	115003982	115017616	minus	10	300130
9606	Homo sapiens	9314	0	live	KLF4	EZF, GKLF	Kruppel like factor 4	Krueppel-like factor 4|Kruppel-like factor 4 (gut)|endothelial Kruppel-like zinc finger protein|epithelial zinc finger protein EZF|gut Kruppel-like factor|gut-enriched krueppel-like factor	9q31.2	9	NC_000009.12	107484852	107489769	minus	4	602253
9606	Homo sapiens	2625	0	live	GATA3	HDR, HDRS	GATA binding protein 3	trans-acting T-cell-specific transcription factor GATA-3|GATA-binding factor 3	10p14	10	NC_000010.11	8045420	8075198	plus	8	131320
9606	Homo sapiens	57805	0	live	CCAR2	DBC-1, DBC1, KIAA1967, NET35, p30 DBC, p30DBC	cell cycle and apoptosis regulator 2	cell cycle and apoptosis regulator protein 2|cell division cycle and apoptosis regulator protein 2|deleted in breast cancer 1|p30 DBC protein	8p21.3	8	NC_000008.11	22604740	22621514	plus	22	607359
9606	Homo sapiens	23532	0	live	PRAME	CT130, MAPE, OIP-4, OIP4	preferentially expressed antigen in melanoma	melanoma antigen preferentially expressed in tumors|Opa-interacting protein OIP4|cancer/testis antigen 130|opa-interacting protein 4|preferentially expressed antigen of melanoma	22q11.22	22	NC_000022.11	22547696	22559361	minus	7	606021
9606	Homo sapiens	100507056	0	live	CCAT1	CARLO5, CARLo-5, onco-lncRNA-40	colon cancer associated transcript 1	colon cancer associated transcript 1 (non-protein coding)	8q24.21	8	NC_000008.11	127207382	127219268	minus	2	617705
9606	Homo sapiens	1080	0	live	CFTR	ABC35, ABCC7, CF/MRP, MRP7, TNR-CFTR, dJ760C5.1, CFTR	CF transmembrane conductance regulator	cystic fibrosis transmembrane conductance regulator|cAMP-dependent chloride channel|channel conductance-controlling ATPase|cystic fibrosis transmembrane conductance regulating|cystic fibrosis transmembrane conductance regulator (ATP-binding cassette sub-family C, member 7)	7q31.2	7	NC_000007.14	117480025	117668665	plus	27	602421
9606	Homo sapiens	81037	0	live	CLPTM1L	CRR9	CLPTM1 like	cleft lip and palate transmembrane protein 1-like protein|CLPTM1-like protein|cisplatin resistance related protein CRR9p|cisplatin resistance-related protein 9	5p15.33	5	NC_000005.10	1317752	1345099	minus	17	612585
9606	Homo sapiens	10460	0	live	TACC3	ERIC-1, ERIC1, Tacc4, maskin	transforming acidic coiled-coil containing protein 3	transforming acidic coiled-coil-containing protein 3	4p16.3	4	NC_000004.12	1721497	1745171	plus	18	605303
9606	Homo sapiens	898	0	live	CCNE1	CCNE, pCCNE1	cyclin E1	G1/S-specific cyclin-E1	19q12	19	NC_000019.10	29811991	29824312	plus	12	123837
9606	Homo sapiens	4102	0	live	MAGEA3	CT1.3, HIP8, HYPD, MAGE3, MAGEA6	MAGE family member A3	melanoma-associated antigen 3|MAGE-3 antigen|antigen MZ2-D|cancer/testis antigen 1.3|cancer/testis antigen family 1, member 3|melanoma antigen family A, 3|melanoma antigen family A3	Xq28	X	NC_000023.11	152698742	152702347	plus	6	300174
9606	Homo sapiens	728655	0	live	HULC	HCCAT1, LINC00078, NCRNA00078	hepatocellular carcinoma up-regulated long non-coding RNA	hepatocellular carcinoma associated transcript 1 (non-protein coding)|highly up-regulated in liver cancer (non-protein coding)|highly up-regulated in liver cancer long non-coding RNA|long intergenic non-protein coding RNA 78	6p24.3	6	NC_000006.12	8652209	8653846	plus	2	612210
9606	Homo sapiens	101928165	0	live	CASC17	LINC00600	cancer susceptibility 17	cancer susceptibility 17 (non-protein coding)|cancer susceptibility candidate 17 (non-protein coding)|long intergenic non-protein coding RNA 600	17q24.3	17	NC_000017.11	71097774	71202179	minus	4
9606	Homo sapiens	3479	0	live	IGF1	IGF, IGF-I, IGFI, MGF	insulin like growth factor 1	insulin-like growth factor I|insulin-like growth factor 1 (somatomedin C)|insulin-like growth factor IB|mechano growth factor|somatomedin-C	12q23.2	12	NC_000012.12	102395860	102481839	minus	7	147440
9606	Homo sapiens	1030	0	live	CDKN2B	CDK4I, INK4B, MTS2, P15, TP15, p15INK4b	cyclin dependent kinase inhibitor 2B	cyclin-dependent kinase 4 inhibitor B|CDK inhibitory protein|CDK4B inhibitor|MTS-2|cyclin-dependent kinase inhibitor 2B (p15, inhibits CDK4)|cyclin-dependent kinases 4 and 6 binding protein|multiple tumor suppressor 2|p14-INK4b|p14_CDK inhibitor|p14_INK4B|p15 CDK inhibitor|p15-INK4b|p15_INK4B	9p21.3	9	NC_000009.12	22002903	22009313	minus	2	600431
9606	Homo sapiens	55872	0	live	PBK	CT84, HEL164, Nori-3, SPK, TOPK	PDZ binding kinase	lymphokine-activated killer T-cell-originated protein kinase|MAPKK-like protein kinase|T-LAK cell-originated protein kinase|cancer/testis antigen 84|epididymis luminal protein 164|serine/threonine protein kinase|spermatogenesis-related protein kinase	8p21.1	8	NC_000008.11	27809624	27837817	minus	8	611210
9606	Homo sapiens	1452	0	live	CSNK1A1	CK1, CK1a, CKIa, HEL-S-77p, HLCDGP1, PRO2975	casein kinase 1 alpha 1	casein kinase I isoform alpha|CKI-alpha|clock regulator kinase|down-regulated in lung cancer|epididymis secretory sperm binding protein Li 77p	5q32	5	NC_000005.10	149492982	149551439	minus	11	600505
9606	Homo sapiens	2066	0	live	ERBB4	ALS19, HER4, p180erbB4	erb-b2 receptor tyrosine kinase 4	receptor tyrosine-protein kinase erbB-4|avian erythroblastic leukemia viral (v-erb-b2) oncogene homolog 4|human epidermal growth factor receptor 4|proto-oncogene-like protein c-ErbB-4|tyrosine kinase-type cell surface receptor HER4|v-erb-a erythroblastic leukemia viral oncogene homolog 4|v-erb-b2 avian erythroblastic leukemia viral oncogene homolog 4	2q34	2	NC_000002.12	211375717	212538802	minus	31	600543
9606	Homo sapiens	6926	0	live	TBX3	TBX3-ISO, UMS, XHL	T-box transcription factor 3	T-box transcription factor TBX3|T-box 3|T-box protein 3|bladder cancer related protein XHL	12q24.21	12	NC_000012.12	114670255	114684175	minus	8	601621
9606	Homo sapiens	3911	0	live	LAMA5		laminin subunit alpha 5	laminin subunit alpha-5|laminin alpha-5 chain|laminin-10 subunit alpha|laminin-11 subunit alpha|laminin-15 subunit alpha	20q13.33	20	NC_000020.11	62309060	62367318	minus	81	601033
9606	Homo sapiens	140690	0	live	CTCFL	BORIS, CT27, CTCF-T, HMGB1L1, dJ579F20.2	CCCTC-binding factor like	transcriptional repressor CTCFL|BORIS-like protein|brother of the regulator of imprinted sites|cancer/testis antigen 27	20q13.31	20	NC_000020.11	57495965	57525652	minus	16	607022
9606	Homo sapiens	85414	0	live	SLC45A3	IPCA-2, IPCA-6, IPCA-8, IPCA6, PCANAP2, PCANAP6, PCANAP8, PRST	solute carrier family 45 member 3	solute carrier family 45 member 3|prostate cancer associated protein 2|prostate cancer associated protein 6|prostate cancer associated protein 8|prostate cancer-associated gene 2|prostate cancer-associated gene 6|prostate cancer-associated gene 8|prostein	1q32.1	1	NC_000001.11	205657851	205680509	minus	5	605097
9606	Homo sapiens	7917	0	live	BAG6	BAG-6, BAT3, D6S52E, G3	BAG cochaperone 6	large proline-rich protein BAG6|BAG family molecular chaperone regulator 6|BCL2 associated athanogene 6|HLA-B-associated transcript 3|large proline-rich protein BAT3|protein G3|protein Scythe|scythe	6p21.33	6	NC_000006.12	31639028	31660900	minus	31	142590
9606	Homo sapiens	54790	0	live	TET2	KIAA1546, MDS	tet methylcytosine dioxygenase 2	methylcytosine dioxygenase TET2|probable methylcytosine dioxygenase TET2|tet oncogene family member 2	4q24	4	NC_000004.12	105145875	105279803	plus	15	612839
9606	Homo sapiens	27324	0	live	TOX3	CAGF9, TNRC9	TOX high mobility group box family member 3	TOX high mobility group box family member 3|CAG trinucleotide repeat-containing gene F9 protein|trinucleotide repeat-containing gene 9 protein	16q12.1	16	NC_000016.10	52436415	52547802	minus	10	611416
9606	Homo sapiens	3090	0	live	HIC1	ZBTB29, ZNF901, hic-1	HIC ZBTB transcriptional repressor 1	hypermethylated in cancer 1 protein|hypermethylated in cancer 1|zinc finger and BTB domain-containing protein 29	17p13.3	17	NC_000017.11	2055103	2063241	plus	3	603825
9606	Homo sapiens	5795	0	live	PTPRJ	CD148, DEP1, HPTPeta, R-PTP-ETA, SCC1	protein tyrosine phosphatase receptor type J	receptor-type tyrosine-protein phosphatase eta|CD148 antigen|DEP-1|HPTP eta|R-PTP-J|density-enhanced phosphatase 1|human density enhanced phosphatase-1|protein tyrosine phosphatase, receptor type, J polypeptide|protein-tyrosine phosphatase eta|susceptibility to colon cancer 1, mouse, homolog of	11p11.2	11	NC_000011.10	47980504	48170839	plus	27	600925
9606	Homo sapiens	84417	0	live	ECRG4	C2orf40	ECRG4 augurin precursor	augurin|esophageal cancer related gene 4 protein	2q12.2	2	NC_000002.12	106063290	106078155	plus	7	611752
9606	Homo sapiens	5890	0	live	RAD51B	R51H2, RAD51L1, REC2	RAD51 paralog B	DNA repair protein RAD51 homolog 2|RAD51 homolog B|RecA-like protein|recombination repair protein	14q24.1	14	NC_000014.9	67819779	68683118	plus	19	602948
9606	Homo sapiens	3074	0	live	HEXB	ENC-1AS, HEL-248, HEL-S-111	hexosaminidase subunit beta	beta-hexosaminidase subunit beta|HCC-7|N-acetyl-beta-glucosaminidase subunit beta|beta-N-acetylhexosaminidase subunit beta|beta-hexosaminidase beta-subunit|cervical cancer proto-oncogene 7 protein|epididymis luminal protein 248|epididymis secretory protein Li 111|epididymis secretory sperm binding protein|hexosaminidase B (beta polypeptide)|hexosaminidase subunit B	5q13.3	5	NC_000005.10	74640023	74721288	plus	15	606873
9606	Homo sapiens	4100	0	live	MAGEA1	CT1.1, MAGE1	MAGE family member A1	melanoma-associated antigen 1|MAGE-1 antigen|antigen MZ2-E|cancer/testis antigen 1.1|cancer/testis antigen family 1, member 1|melanoma antigen MAGE-1|melanoma antigen family A 1|melanoma antigen family A, 1 (directs expression of antigen MZ2-E)|melanoma antigen family A1|melanoma-associated antigen MZ2-E	Xq28	X	NC_000023.11	153179284	153183880	plus	3	300016
9606	Homo sapiens	55165	0	live	CEP55	C10orf3, CT111, MARCH, URCC6	centrosomal protein 55	centrosomal protein of 55 kDa|cancer/testis antigen 111|centrosomal protein 55kDa|up-regulated in colon cancer 6	10q23.33	10	NC_000010.11	93496612	93529094	plus	9	610000
9606	Homo sapiens	9043	0	live	SPAG9	CT89, HLC-6, HLC4, HLC6, JIP-4, JIP4, JLP, PHET, PIG6	sperm associated antigen 9	C-Jun-amino-terminal kinase-interacting protein 4|JNK interacting protein|JNK/SAPK-associated protein|Max-binding protein|c-Jun NH2-terminal kinase-associated leucine zipper protein|cancer/testis antigen 89|human lung cancer oncogene 6 protein|lung cancer oncogene 4|mitogen-activated protein kinase 8-interacting protein 4|proliferation-inducing gene 6|protein highly expressed in testis|sperm asso…	17q21.33	17	NC_000017.11	50962174	51120868	minus	34	605430
9606	Homo sapiens	1026	0	live	CDKN1A	CAP20, CDKN1, CIP1, MDA-6, P21, SDI1, WAF1, p21CIP1	cyclin dependent kinase inhibitor 1A	cyclin-dependent kinase inhibitor 1|CDK-interacting protein 1|CDK-interaction protein 1|DNA synthesis inhibitor|cyclin-dependent kinase inhibitor 1A (p21, Cip1)|melanoma differentiation associated protein 6|wild-type p53-activated fragment 1	6p21.2	6	NC_000006.12	36676463	36687332	plus	6	116899
9606	Homo sapiens	4172	0	live	MCM3	HCC5, P1-MCM3, P1.h, RLFB	minichromosome maintenance complex component 3	DNA replication licensing factor MCM3|DNA polymerase alpha holoenzyme-associated protein P1|DNA replication factor MCM3|MCM3 minichromosome maintenance deficient 3|RLF subunit beta|cervical cancer proto-oncogene 5|hRlf beta subunit|minichromosome maintenance deficient 3|p102|replication licensing factor, beta subunit	6p12.2	6	NC_000006.12	52264015	52284742	minus	20	602693
9606	Homo sapiens	23671	0	live	TMEFF2	CT120.2, HPP1, TENB2, TPEF, TR, TR-2	transmembrane protein with EGF like and two follistatin like domains 2	tomoregulin-2|cancer/testis antigen family 120, member 2|hyperplastic polyposis protein 1|transmembrane protein TENB2|transmembrane protein with EGF-like and two follistatin-like domains	2q32.3	2	NC_000002.12	191948300	192194933	minus	11	605734
9606	Homo sapiens	26121	0	live	PRPF31	NY-BR-99, PRP31, RP11, SNRNP61	pre-mRNA processing factor 31	U4/U6 small nuclear ribonucleoprotein Prp31|PRP31 pre-mRNA processing factor 31 homolog|U4/U6 snRNP 61 kDa protein|hPrp31|protein 61K|serologically defined breast cancer antigen NY-BR-99	19q13.42	19	NC_000019.10	54115706	54131719	plus	13	606419
9606	Homo sapiens	168400	0	live	DDX53	CAGE, CT26	DEAD-box helicase 53	DEAD box protein 53|DEAD (Asp-Glu-Ala-Asp) box polypeptide 53|DEAD-box protein CAGE|cancer-associated gene protein|cancer/testis antigen 26|probable ATP-dependent RNA helicase DDX53	Xp22.11	X	NC_000023.11	22999960	23003589	plus	1
9606	Homo sapiens	91074	0	live	ANKRD30A	NY-BR-1	ankyrin repeat domain 30A	ankyrin repeat domain-containing protein 30A|serologically defined breast cancer antigen NY-BR-1	10p11.21	10	NC_000010.11	37125754	37309298	plus	59	610856
9606	Homo sapiens	3119	0	live	HLA-DQB1	CELIAC1, HLA-DQB, IDDM1	major histocompatibility complex, class II, DQ beta 1	HLA class II histocompatibility antigen, DQ beta 1 chain|MHC class II DQ beta chain|MHC class II HLA-DQ beta glycoprotein|MHC class II antigen DQB1|MHC class II antigen HLA-DQ-beta-1	6p21.32	6	NC_000006.12	32659467	32666657	minus	6	604305
9606	Homo sapiens	55124	0	live	PIWIL2	CT80, HILI, PIWIL1L, mili	piwi like RNA-mediated gene silencing 2	piwi-like protein 2|80kDa PIWIL2 short isoform|cancer/testis antigen 80|piwi-like 2|piwil2-like protein|testicular tissue protein Li 141	8p21.3	8	NC_000008.11	22275314	22357568	plus	25	610312
9606	Homo sapiens	472	0	live	ATM	AT1, ATA, ATC, ATD, ATDC, ATE, TEL1, TELO1	ATM serine/threonine kinase	serine-protein kinase ATM|A-T mutated|AT mutated|TEL1, telomere maintenance 1, homolog|ataxia telangiectasia mutated	11q22.3	11	NC_000011.10	108222484	108369102	plus	69	607585
9606	Homo sapiens	220064	0	live	LTO1	CIAB1, ORAOV1, TAOS1	LTO1 maturation factor of ABCE1	protein LTO1 homolog|LTO1, ABCE1 maturation factor|oral cancer overexpressed 1|oral cancer overexpressed protein 1-A|oral cancer-overexpressed protein 1|tumor-amplified and overexpressed sequence 1	11q13.3	11	NC_000011.10	69665563	69675354	minus	5	607224
9606	Homo sapiens	4103	0	live	MAGEA4	CT1.4, MAGE-41, MAGE-X2, MAGE4, MAGE4A, MAGE4B	MAGE family member A4	melanoma-associated antigen 4|MAGE-4 antigen|MAGE-41 antigen|MAGE-X2 antigen|cancer/testis antigen 1.4|cancer/testis antigen family 1, member 4|melanoma antigen family A, 4|melanoma antigen family A4	Xq28	X	NC_000023.11	151912889	151925170	plus	8	300175
9606	Homo sapiens	6563	0	live	SLC14A1	HUT11, HsT1341, JK, Jk(b), RACH1, RACH2, UT-B1, UT1, UTE	solute carrier family 14 member 1 (Kidd blood group)	urea transporter 1|Kidd blood group|Kidd blood group antigen|SLC14A1 JK|solute carrier family 14 (urea transporter), member 1 (Kidd blood group)|urea transporter JK glycoprotein|urea transporter, erythrocyte|urea transporter-B1	18q12.3	18	NC_000018.10	45724127	45752520	plus	13	613868
9606	Homo sapiens	5245	0	live	PHB	HEL-215, HEL-S-54e1, PHB	prohibitin	prohibitin|epididymis luminal protein 215|epididymis secretory sperm binding protein Li 54e	17q21.33	17	NC_000017.11	49404048	49414905	minus	8	176705
9606	Homo sapiens	57214	0	live	CEMIP	CCSP1, HYBID, KIAA1199, TMEM2L	cell migration inducing hyaluronidase 1	cell migration-inducing and hyaluronan-binding protein|cell migration inducing hyaluronan binding protein|cell migration inducing protein, hyaluronan binding|colon cancer secreted protein 1|hyaluronan-binding protein involved in hyaluronan depolymerization	15q25.1	15	NC_000015.10	80779370	80951771	plus	30	608366
9606	Homo sapiens	7012	0	live	TERC	DKCA1, PFBMFT2, SCARNA19, TR, TRC3, hTR	telomerase RNA component	small Cajal body-specific RNA 19	3q26.2	3	NC_000003.12	169764610	169765060	minus	1	602322
9606	Homo sapiens	84525	0	live	HOPX	CAMEO, HOD, HOP, LAGY, NECC1, OB1, SMAP31, TOTO	HOP homeobox	homeodomain-only protein|lung cancer-associated Y protein|not expressed in choriocarcinoma clone 1|odd homeobox protein 1	4q12	4	NC_000004.12	56647988	56681866	minus	9	607275
9606	Homo sapiens	6863	0	live	TAC1	Hs.2563, NK2, NKNA, NPK, TAC2	tachykinin precursor 1	protachykinin-1|PPT|neurokinin 1|neurokinin 2|neurokinin A|neurokinin alpha|neuromedin L|neuropeptide K|neuropeptide gamma|preprotachykinin|protachykinin|substance K|substance P|tachykinin 2|tachykinin, precursor 1 (substance K, substance P, neurokinin 1, neurokinin 2, neuromedin L, neurokinin alpha, neuropeptide K, neuropeptide gamma)	7q21.3	7	NC_000007.14	97732086	97740472	plus	7	162320
9606	Homo sapiens	220296	0	live	HEPACAM	GlialCAM, HEPN1, MLC2A, MLC2B	hepatic and glial cell adhesion molecule	hepatocyte cell adhesion molecule|Putative cancer susceptibility gene HEPN1 protein|protein hepaCAM	11q24.2	11	NC_000011.10	124919205	124936412	minus	7	611642
9606	Homo sapiens	170302	0	live	ARX	CT121, EIEE1, ISSX, MRX29, MRX32, MRX33, MRX36, MRX38, MRX43, MRX54, MRX76, MRX87, MRXS1, PRTS	aristaless related homeobox	homeobox protein ARX|aristaless-related homeobox, X-linked|cancer/testis antigen 121	Xp21.3	X	NC_000023.11	25003694	25015965	minus	5	300382
9606	Homo sapiens	4046	0	live	LSP1	WP34, pp52	lymphocyte specific protein 1	lymphocyte-specific protein 1|47 kDa actin binding protein|52 kDa phosphoprotein|F-actin binding and cytoskeleton associated protein|leufactin (leukocyte F-actin binding protein)|leukocyte-specific protein 1|lymphocyte-specific antigen WP34	11p15.5	11	NC_000011.10	1853084	1892263	plus	16	153432
9606	Homo sapiens	10761	0	live	PLAC1	CT92, OOSP2B, OOSP2L	placenta enriched 1	placenta-specific protein 1|cancer/testis antigen 92|placenta specific 1	Xq26.3	X	NC_000023.11	134565838	134764322	minus	6	300296
9606	Homo sapiens	5307	0	live	PITX1	BFT, CCF, LBNBG, POTX, PTX1	paired like homeodomain 1	pituitary homeobox 1|hindlimb expressed homeobox protein backfoot|homeobox protein PITX1|paired-like homeodomain transcription factor 1|pituitary homeo box 1|pituitary otx-related factor	5q31.1	5	NC_000005.10	135027734	135034228	minus	3	602149
9606	Homo sapiens	10257	0	live	ABCC4	MOAT-B, MOATB, MRP4	ATP binding cassette subfamily C member 4	multidrug resistance-associated protein 4|MRP/cMOAT-related ABC transporter|bA464I2.1 (ATP-binding cassette, sub-family C (CFTR/MRP), member 4)|canalicular multispecific organic anion transporter (ABC superfamily)|multi-specific organic anion transporter B	13q32.1	13	NC_000013.11	95019829	95301451	minus	36	605250
9606	Homo sapiens	7258	0	live	TSPY1	CT78, DYS14, TSPY, pJA923	testis specific protein Y-linked 1	testis-specific Y-encoded protein 1|cancer/testis antigen 78|testis specific protein, Y-linked	Yp11.2	Y	NC_000024.10	9466955	9469756	plus	6	480100
9606	Homo sapiens	80184	0	live	CEP290	3H11Ag, BBS14, CT87, JBTS5, LCA10, MKS4, NPHP6, POC3, SLSN6, rd16	centrosomal protein 290	centrosomal protein of 290 kDa|Bardet-Biedl syndrome 14 protein|CTCL tumor antigen se2-2|Meckel syndrome, type 4|POC3 centriolar protein homolog|cancer/testis antigen 87|centrosomal protein 290kDa|monoclonal antibody 3H11 antigen|nephrocytsin-6|prostate cancer antigen T21|tumor antigen se2-2	12q21.32	12	NC_000012.12	88049013	88142216	minus	60	610142
9606	Homo sapiens	50636	0	live	ANO7	D-TMPP, DTMPP, IPCA-5, IPCA5, NGEP, PCANAP5, PCANAP5L, TMEM16G	anoctamin 7	anoctamin-7|Dresden-transmembrane protein of the prostate|prostate cancer associated protein 5|transmembrane protein 16G	2q37.3	2	NC_000002.12	241188514	241239602	plus	27	605096
9606	Homo sapiens	177	0	live	AGER	RAGE, SCARJ1	advanced glycosylation end-product specific receptor	advanced glycosylation end product-specific receptor|RAGE isoform NtRAGE-delta|RAGE isoform sRAGE-delta|receptor for advanced glycation end-products variant 20	6p21.32	6	NC_000006.12	32180968	32184380	minus	11	600214
9606	Homo sapiens	374	0	live	AREG	ARB, CRDGF, SDGF, AREG	amphiregulin	amphiregulin|amphiregulin B|colorectum cell-derived growth factor|schwannoma-derived growth factor	4q13.3	4	NC_000004.12	74445136	74455005	plus	6	104640
9606	Homo sapiens	29028	0	live	ATAD2	ANCCA, CT137, PRO2000	ATPase family AAA domain containing 2	ATPase family AAA domain-containing protein 2|AAA nuclear coregulator cancer-associated protein	8q24.13	8	NC_000008.11	123319850	123396447	minus	28	611941
9606	Homo sapiens	7991	0	live	TUSC3	D8S1992, M33, MRT22, MRT7, MagT2, N33, OST3A, SLC58A2	tumor suppressor candidate 3	tumor suppressor candidate 3|dolichyl-diphosphooligosaccharide--protein glycosyltransferase subunit TUSC3|magnesium uptake/transporter TUSC3|mental retardation, non-syndromic, autosomal recessive, 22|oligosaccharyl transferase subunit TUSC3|oligosaccharyltransferase 3 homolog A|putative prostate cancer tumor suppressor	8p22	8	NC_000008.11	15540087	15766649	plus	12	601385
9606	Homo sapiens	4610	0	live	MYCL	L-Myc, LMYC1, bHLHe38, MYCL	MYCL proto-oncogene, bHLH transcription factor	protein L-Myc|class E basic helix-loop-helix protein 38|l-myc-1 proto-oncogene|myc-related gene from lung cancer|protein L-Myc-1|v-myc avian myelocytomatosis viral oncogene lung carcinoma derived homolog|v-myc myelocytomatosis viral oncogene homolog 1, lung carcinoma derived	1p34.2	1	NC_000001.11	39895428	39901917	minus	2	164850
9606	Homo sapiens	8667	0	live	EIF3H	EIF3S3, eIF3-gamma, eIF3-p40	eukaryotic translation initiation factor 3 subunit H	eukaryotic translation initiation factor 3 subunit H|eIF-3-gamma|eIF3 p40 subunit|eukaryotic translation initiation factor 3 subunit 3|eukaryotic translation initiation factor 3, subunit 2 (beta, 36kD)|eukaryotic translation initiation factor 3, subunit 3 (gamma, 40kD)|eukaryotic translation initiation factor 3, subunit 3 gamma, 40kDa	8q23.3-q24.11	8	NC_000008.11	116642130	116755823	minus	8	603912
9606	Homo sapiens	3630	0	live	INS	IDDM, IDDM1, IDDM2, ILPR, IRDN, MODY10	insulin	insulin|preproinsulin|proinsulin	11p15.5	11	NC_000011.10	2159779	2161209	minus	3	176730
9606	Homo sapiens	101928292	0	live	LINC01488	BRCAT8	long intergenic non-protein coding RNA 1488	breast cancer-associated transcript 8	11q13.3	11	NC_000011.10	69485561	69493543	plus	6	617696
9606	Homo sapiens	51438	0	live	MAGEC2	CT10, HCA587, MAGEE1	MAGE family member C2	melanoma-associated antigen C2|MAGE-C2 antigen|MAGE-E1 antigen|cancer/testis antigen 10|hepatocellular cancer antigen 587|hepatocellular carcinoma-associated antigen 587|melanoma antigen family C, 2|melanoma antigen family C2|melanoma antigen, family E, 1, cancer/testis specific	Xq27.2	X	NC_000023.11	142202342	142205290	minus	3	300468
9606	Homo sapiens	6757	0	live	SSX2	CT5.2, CT5.2A, HD21, HOM-MEL-40, SSX	SSX family member 2	protein SSX2|cancer/testis antigen 5.2|cancer/testis antigen family 5, member 2a|sarcoma, synovial, X-chromosome-related 2|synovial sarcoma, X breakpoint 2|synovial sarcoma, X breakpoint 2B|tumor antigen HOM-MEL-40	Xp11.22	X	NC_000023.11	52696896	52707227	minus	9	300192
9606	Homo sapiens	688	0	live	KLF5	BTEB2, CKLF, IKLF	Kruppel like factor 5	Krueppel-like factor 5|(intestinal Kruppel-like factor|BTE-binding protein 2|GC box binding protein 2|Klf5C isoform|Kruppel-like factor 5 (intestinal)|basic transcription element binding protein 2|colon krueppel-like factor|colon kruppel-like factor|epididymis secretory sperm binding protein|intestinal-enriched krueppel-like factor|intestinal-enriched kruppel-like factor|transcription factor BTEB2	13q22.1	13	NC_000013.11	73054976	73077542	plus	5	602903
9606	Homo sapiens	894	0	live	CCND2	KIAK0002, MPPH3	cyclin D2	G1/S-specific cyclin-D2	12p13.32	12	NC_000012.12	4273762	4305353	plus	5	123833
9606	Homo sapiens	9687	0	live	GREB1		growth regulating estrogen receptor binding 1	protein GREB1|gene regulated by estrogen in breast cancer|gene regulated in breast cancer 1 protein|growth regulation by estrogen in breast cancer 1	2p25.1	2	NC_000002.12	11481675	11642788	plus	43	611736
9606	Homo sapiens	219541	0	live	MED19	DT2P1G7, LCMR1AS, MED19	mediator complex subunit 19	mediator of RNA polymerase II transcription subunit 19|lung cancer metastasis-related protein 1|mediator of RNA polymerase II transcription, subunit 19 homolog|putative mediator subunit MED19AS protein	11q12.1	11	NC_000011.10	57703709	57712323	minus	5	612385
9606	Homo sapiens	6406	0	live	SEMG1	CT103, SEMG, SGI, dJ172H20.2	semenogelin 1	semenogelin-1|SgI-29|cancer/testis antigen 103|semen coagulating protein|semenogelin I	20q13.12	20	NC_000020.11	45207033	45209768	plus	3	182140
9606	Homo sapiens	100750225	0	live	PCAT1	PCA1, PCAT-1	prostate cancer associated transcript 1	prostate cancer associated transcript 1 (non-protein coding)	8q24.21	8	NC_000008.11	127013154	127021014	plus	2	616043
9606	Homo sapiens	3557	0	live	IL1RN	DIRA, ICIL-1RA, IL-1RN, IL-1ra, IL-1ra3, IL1F3, IL1RA, IRAP, MVCD4	interleukin 1 receptor antagonist	interleukin-1 receptor antagonist protein|IL1 inhibitor|intracellular IL-1 receptor antagonist type II|intracellular interleukin-1 receptor antagonist (icIL-1ra)|type II interleukin-1 receptor antagonist	2q14.1	2	NC_000002.12	113099365	113134016	plus	11	147679
9606	Homo sapiens	255082	0	live	CASC2	C10orf5	cancer susceptibility 2	cancer susceptibility 2 (non-protein coding)|cancer susceptibility candidate 2 (non-protein coding)	10q26.11	10	NC_000010.11	118046821	118210153	plus	6	608598
9606	Homo sapiens	338	0	live	APOB	FCHL2, FLDB, LDLCQ4, apoB-100, apoB-48	apolipoprotein B	apolipoprotein B-100|apolipoprotein B (including Ag(x) antigen)|apolipoprotein B48	2p24.1	2	NC_000002.12	21001429	21044073	minus	29	107730
9606	Homo sapiens	8412	0	live	BCAR3	AND-34, NSP2, SH2D3B	BCAR3 adaptor protein, NSP family member	breast cancer anti-estrogen resistance protein 3|BCAR3, NSP family adaptor protein|SH2 domain-containing protein 3B|breast cancer anti-estrogen resistance 3|breast cancer antiestrogen resistance 3 protein|dJ1033H22.2 (breast cancer anti-estrogen resistance 3)|epididymis secretory sperm binding protein|novel SH2-containing protein 2	1p22.1	1	NC_000001.11	93561741	93847219	minus	19	604704
9606	Homo sapiens	23037	0	live	PDZD2	AIPC, PAPIN, PDZK3, PIN1	PDZ domain containing 2	PDZ domain-containing protein 2|PDZ domain-containing protein 3|activated in prostate cancer protein|plakophilin-related armadillo repeat protein-interactive PDZ protein	5p13.3	5	NC_000005.10	31639131	32110932	plus	30	610697
9606	Homo sapiens	8111	0	live	GPR68	AI2A6, GPR12A, OGR1	G protein-coupled receptor 68	ovarian cancer G-protein coupled receptor 1|ovarian cancer G protein-coupled receptor, 1|sphingosylphosphorylcholine receptor	14q32.11	14	NC_000014.9	91232532	91264581	minus	10	601404
9606	Homo sapiens	2736	0	live	GLI2	CJS, HPE9, PHS2, THP1, THP2	GLI family zinc finger 2	zinc finger protein GLI2|GLI family zinc finger protein 2|GLI-Kruppel family member GLI2|glioma-associated oncogene family zinc finger 2|oncogene GLI2|tax helper protein 1|tax helper protein 2|tax-responsive element-2 holding protein|tax-responsive element-25-bp sequence binding protein	2q14.2	2	NC_000002.12	120735868	120992653	plus	19	165230
9606	Homo sapiens	5685	0	live	PSMA4	HC9, HsT17706, PSC9	proteasome 20S subunit alpha 4	proteasome subunit alpha type-4|macropain subunit C9|multicatalytic endopeptidase complex subunit C9|proteasome (prosome, macropain) subunit, alpha type, 4|proteasome component C9|proteasome subunit HC9|proteasome subunit L|proteasome subunit alpha 4|proteasome subunit alpha3	15q25.1	15	NC_000015.10	78540405	78552417	plus	10	176846
9606	Homo sapiens	23221	0	live	RHOBTB2	DBC2, EIEE64, p83	Rho related BTB domain containing 2	rho-related BTB domain-containing protein 2|deleted in breast cancer 2 gene protein	8p21.3	8	NC_000008.11	22987251	23020199	plus	15	607352
9606	Homo sapiens	22950	0	live	SLC4A1AP	HLC3	solute carrier family 4 member 1 adaptor protein	kanadaptin|HLC-3|human lung cancer oncogene 3 protein|kidney anion exchanger adapter protein|kidney anion exchanger adaptor protein|lung cancer oncogene 3|solute carrier family 4 (anion exchanger), member 1, adapter protein|solute carrier family 4 (anion exchanger), member 1, adaptor protein|solute carrier family 4 anion exchanger member 1 adapter protein	2p23.3	2	NC_000002.12	27663471	27694980	plus	14	602655
9606	Homo sapiens	57402	0	live	S100A14	BCMP84, S100A15	S100 calcium binding protein A14	protein S100-A14|S114|breast cancer membrane protein 84	1q21.3	1	NC_000001.11	153614255	153616917	minus	6	607986
9606	Homo sapiens	57082	0	live	KNL1	AF15Q14, CASC5, CT29, D40, MCPH4, PPP1R55, Spc7, hKNL-1, hSpc105	kinetochore scaffold 1	kinetochore scaffold 1|ALL1-fused gene from chromosome 15q14 protein|blinkin, bub-linking kinetochore protein|cancer susceptibility candidate 5|cancer susceptibility candidate gene 5 protein|cancer/testis antigen 29|kinetochore null 1 homolog|kinetochore-null protein 1|microcephaly, primary autosomal recessive 4|protein phosphatase 1, regulatory subunit 55	15q15.1	15	NC_000015.10	40594012	40664342	plus	27	609173
9606	Homo sapiens	2494	0	live	NR5A2	B1F, B1F2, CPF, FTF, FTZ-F1, FTZ-F1beta, LRH-1, LRH1, hB1F-2	nuclear receptor subfamily 5 group A member 2	nuclear receptor subfamily 5 group A member 2|CYP7A promoter-binding factor|b1-binding factor, hepatocyte transcription factor which activates enhancer II of hepatitis B virus|fetoprotein-alpha 1 (AFP) transcription factor|hepatocytic transcription factor hB1F-3|liver nuclear receptor homolog-1 variant 2	1q32.1	1	NC_000001.11	200027710	200177424	plus	13	604453
9606	Homo sapiens	8099	0	live	CDK2AP1	DOC1, DORC1, ST19, doc-1, p12DOC-1	cyclin dependent kinase 2 associated protein 1	cyclin-dependent kinase 2-associated protein 1|CDK2-associated protein 1|Deleted in oral cancer-1|deleted in oral cancer 1|putative oral cancer suppressor	12q24.31	12	NC_000012.12	123260970	123272240	minus	8	602198
9606	Homo sapiens	2068	0	live	ERCC2	COFS2, EM9, TFIIH, TTD, TTD1, XPD	ERCC excision repair 2, TFIIH core complex helicase subunit	general transcription and DNA repair factor IIH helicase subunit XPD|BTF2 p80|CXPD|DNA excision repair protein ERCC-2|DNA repair protein complementing XP-D cells|TFIIH 80 kDa subunit|TFIIH basal transcription factor complex 80 kDa subunit|TFIIH basal transcription factor complex helicase XPB subunit|TFIIH basal transcription factor complex helicase XPD subunit|TFIIH basal transcription factor com…	19q13.32	19	NC_000019.10	45349837	45370647	minus	25	126340
9606	Homo sapiens	11214	0	live	AKAP13	AKAP-13, AKAP-Lbc, ARHGEF13, BRX, HA-3, Ht31, LBC, PRKA13, PROTO-LB, PROTO-LBC, c-lbc, p47	A-kinase anchoring protein 13	A-kinase anchor protein 13|A kinase (PRKA) anchor protein 13|LBC oncogene|breast cancer nuclear receptor-binding auxiliary protein|guanine nucleotide exchange factor Lbc|human thyroid-anchoring protein 31|lymphoid blast crisis oncogene|non-oncogenic Rho GTPase-specific GTP exchange factor|protein kinase A-anchoring protein 13	15q25.3	15	NC_000015.10	85380603	85749358	plus	39	604686
9606	Homo sapiens	2048	0	live	EPHB2	BDPLT22, CAPB, DRT, EK5, EPHT3, ERK, Hek5, PCBC, Tyro5	EPH receptor B2	ephrin type-B receptor 2|EPH-like kinase 5|developmentally-regulated Eph-related tyrosine kinase|elk-related tyrosine kinase|eph tyrosine kinase 3|protein-tyrosine kinase HEK5|renal carcinoma antigen NY-REN-47|tyrosine-protein kinase TYRO5|tyrosine-protein kinase receptor EPH-3	1p36.12	1	NC_000001.11	22710770	22921500	plus	17	600997
9606	Homo sapiens	10904	0	live	BLCAP	BC10	BLCAP apoptosis inducing factor	bladder cancer-associated protein|bladder cancer associated protein|bladder cancer related protein (10kD)	20q11.23	20	NC_000020.11	37517417	37527931	minus	7	613110
9606	Homo sapiens	9497	0	live	SLC4A7	NBC2, NBC3, NBCN1, SBC2, SLC4A6	solute carrier family 4 member 7	sodium bicarbonate cotransporter 3|bicarbonate transporter|electroneutral Na/HCO(3) cotransporter|sodium bicarbonate cotransporter 2|sodium bicarbonate cotransporter 2b|solute carrier family 4, sodium bicarbonate cotransporter, member 7	3p24.1	3	NC_000003.12	27372721	27484420	minus	28	603353
9606	Homo sapiens	2528	0	live	FUT6	FCT3A, FT1A, Fuc-TVI, FucT-VI	fucosyltransferase 6	alpha-(1,3)-fucosyltransferase 6|fucosyltransferase 6 (alpha (1,3) fucosyltransferase)|fucosyltransferase VI|galactoside 3-L-fucosyltransferase	19p13.3	19	NC_000019.10	5830408	5840019	minus	5	136836
9606	Homo sapiens	79695	0	live	GALNT12	CRCS1, GalNAc-T12	polypeptide N-acetylgalactosaminyltransferase 12	polypeptide N-acetylgalactosaminyltransferase 12|UDP-GalNAc:polypeptide N-acetylgalactosaminyltransferase 12|UDP-N-acetyl-alpha-D-galactosamine:polypeptide N-acetylgalactosaminyltransferase 12 (GalNAc-T12)|colorectal cancer, susceptibility to 1|polypeptide GalNAc transferase 12|pp-GaNTase 12|protein-UDP acetylgalactosaminyltransferase 12	9q22.33	9	NC_000009.12	98807670	98850081	plus	13	610290
9606	Homo sapiens	10413	0	live	YAP1	COB1, YAP, YAP2, YAP65, YKI	Yes1 associated transcriptional regulator	transcriptional coactivator YAP1|65 kDa Yes-associated protein|Yes associated protein 1|protein yorkie homolog|yes-associated protein 1|yes-associated protein 2|yes-associated protein YAP65 homolog|yorkie homolog	11q22.1	11	NC_000011.10	102109957	102233424	plus	10	606608
9606	Homo sapiens	3597	0	live	IL13RA1	CD213A1, CT19, IL-13Ra, NR4	interleukin 13 receptor subunit alpha 1	interleukin-13 receptor subunit alpha-1|CD213a1 antigen|IL-13 receptor subunit alpha-1|IL-13R subunit alpha-1|IL13 receptor alpha-1 chain|cancer/testis antigen 19|interleukin 13 receptor, alpha 1	Xq24	X	NC_000023.11	118726954	118794533	plus	12	300119
9606	Homo sapiens	9557	0	live	CHD1L	ALC1, CHDL	chromodomain helicase DNA binding protein 1 like	chromodomain-helicase-DNA-binding protein 1-like|amplified in liver cancer 1|amplified in liver cancer protein 1	1q21.1	1	NC_000001.11	147172747	147295766	plus	27	613039
9606	Homo sapiens	83990	0	live	BRIP1	BACH1, FANCJ, OF	BRCA1 interacting protein C-terminal helicase 1	Fanconi anemia group J protein|ATP-dependent RNA helicase BRIP1|BRCA1-associated C-terminal helicase 1|BRCA1-binding helicase-like protein BACH1|BRCA1/BRCA2-associated helicase 1	17q23.2	17	NC_000017.11	61679139	61864120	minus	25	605882
9606	Homo sapiens	273	0	live	AMPH	AMPH1	amphiphysin	amphiphysin|amphiphysin (Stiff-Mann syndrome with breast cancer 128kD autoantigen)|amphiphysin I	7p14.1	7	NC_000007.14	38383694	38631567	minus	23	600418
9606	Homo sapiens	26057	0	live	ANKRD17	GTAR, MASK2, NY-BR-16	ankyrin repeat domain 17	ankyrin repeat domain-containing protein 17|gene trap ankyrin repeat protein|serologically defined breast cancer antigen NY-BR-16	4q13.3	4	NC_000004.12	73073376	73259766	minus	37	615929
9606	Homo sapiens	3265	0	live	HRAS	C-BAS/HAS, C-H-RAS, C-HA-RAS1, CTLO, H-RASIDX, HAMSV1, KRAS, KRAS2, Ki-Ras, RASH1, RASK2, c-K-ras, c-Ki-ras, p21ras, HRAS	HRas proto-oncogene, GTPase	GTPase HRas|GTP- and GDP-binding peptide B|GTPase KRas|Ha-Ras1 proto-oncoprotein|Harvey rat sarcoma viral oncogene homolog|Harvey rat sarcoma viral oncoprotein|K-Ras 2|Ras family small GTP binding protein H-Ras|c-has/bas p21 protein|c-ras-Ki-2 activated oncogene|p19 H-RasIDX protein|transformation gene: oncogene HAMSV|transforming protein p21|v-Ha-ras Harvey rat sarcoma viral oncogene homolog	11p15.5	11	NC_000011.10	532242	535576	minus	7	190020
9606	Homo sapiens	2130	0	live	EWSR1	EWS, EWS-FLI1, bK984G1.4	EWS RNA binding protein 1	RNA-binding protein EWS|EWS RNA-binding protein variant 6|Ewing sarcoma breakpoint region 1|Ewings sarcoma EWS-Fli1 (type 1) oncogene	22q12.2	22	NC_000022.11	29268254	29300523	plus	19	133450
9606	Homo sapiens	90627	0	live	STARD13	ARHGAP37, DLC2, GT650, LINC00464	StAR related lipid transfer domain containing 13	stAR-related lipid transfer protein 13|Rho GTPase activating protein on chromosome 13q12|StAR-related lipid transfer (START) domain containing 13|deleted in liver cancer 2 protein|long intergenic non-protein coding RNA 464	13q13.1-q13.2	13	NC_000013.11	33103137	33676829	minus	23	609866
9606	Homo sapiens	213	0	live	ALB	HSA, PRO0883, PRO0903, PRO1341	albumin	serum albumin	4q13.3	4	NC_000004.12	73404287	73421482	plus	15	103600
9606	Homo sapiens	217	0	live	ALDH2	ALDH-E2, ALDHI, ALDM	aldehyde dehydrogenase 2 family member	aldehyde dehydrogenase, mitochondrial|ALDH class 2|acetaldehyde dehydrogenase 2|aldehyde dehydrogenase 2 family (mitochondrial)|epididymis secretory sperm binding protein|liver mitochondrial ALDH|nucleus-encoded mitochondrial aldehyde dehydrogenase 2	12q24.12	12	NC_000012.12	111766933	111817532	plus	13	100650
9606	Homo sapiens	7054	0	live	TH	DYT14, DYT5b, TYH	tyrosine hydroxylase	tyrosine 3-monooxygenase|dystonia 14|tyrosine 3-hydroxylase	11p15.5	11	NC_000011.10	2163929	2174081	minus	14	191290
9606	Homo sapiens	26585	0	live	GREM1	C15DUPq, CKTSF1B1, CRAC1, CRCS4, DAND2, DRM, DUP15q, GREMLIN, HMPS, HMPS1, IHG-2, MPSH, PIG2	gremlin 1, DAN family BMP antagonist	gremlin-1|DAN domain family member 2|cell proliferation-inducing gene 2 protein|colorectal adenoma and carcinoma 1|cysteine knot superfamily 1, BMP antagonist 1|down-regulated in Mos-transformed cells protein|gremlin 1, cysteine knot superfamily, homolog|gremlin 1-like protein|hereditary mixed polyposis syndrome|increased in high glucose-2	15q13.3	15	NC_000015.10	32718004	32745106	plus	3	603054
9606	Homo sapiens	84651	0	live	SPINK7	ECG2, ECRG2	serine peptidase inhibitor Kazal type 7	serine protease inhibitor Kazal-type 7|ECRG-2|esophagus cancer-related gene 2 protein|esophagus cancer-related gene-2|serine peptidase inhibitor, Kazal type 7 (putative)	5q32	5	NC_000005.10	148312423	148315919	plus	4	617288
9606	Homo sapiens	56892	0	live	TCIM	C8orf4, TC-1, TC1	transcriptional and immune response regulator	transcriptional and immune response regulator|human thyroid cancer 1|protein C8orf4|thyroid cancer protein 1	8p11.21	8	NC_000008.11	40153482	40155310	plus	1	607702
9606	Homo sapiens	7124	0	live	TNF	DIF-alpha, TNFA, TNFSF2, TNLG1F, TNF	tumor necrosis factor	tumor necrosis factor|APC1 protein|TNF, macrophage-derived|TNF, monocyte-derived|TNF-a|cachectin|tumor necrosis factor ligand 1F|tumor necrosis factor ligand superfamily member 2|tumor necrosis factor-alpha	6p21.33	6	NC_000006.12	31575565	31578336	plus	4	191160
9606	Homo sapiens	348	0	live	APOE	AD2, APO-E, ApoE4, LDLCQ5, LPG	apolipoprotein E	apolipoprotein E|apolipoprotein E3	19q13.32	19	NC_000019.10	44905796	44909395	plus	6	107741
9606	Homo sapiens	83540	0	live	NUF2	CDCA1, CT106R, NUF2	NUF2 component of NDC80 kinetochore complex	kinetochore protein Nuf2|NDC80 kinetochore complex component NUF2|NUF2, NDC80 kinetochore complex component, homolog|cancer/testis antigen 106|cell division cycle associated 1|cell division cycle-associated protein 1|hNuf2|hNuf2R|hsNuf2	1q23.3	1	NC_000001.11	163321948	163355764	plus	15	611772
9606	Homo sapiens	3481	0	live	IGF2	C11orf43, GRDF, IGF-II, PP9974	insulin like growth factor 2	insulin-like growth factor II|T3M-11-derived growth factor|insulin-like growth factor 2 (somatomedin A)|insulin-like growth factor type 2|preptin	11p15.5	11	NC_000011.10	2129112	2149603	minus	9	147470
9606	Homo sapiens	56667	0	live	MUC13	DRCC1, MUC-13	mucin 13, cell surface associated	mucin-13|down-regulated in colon cancer 1|mucin 13, epithelial transmembrane	3q21.2	3	NC_000003.12	124905442	124934751	minus	12	612181
9606	Homo sapiens	54828	0	live	BCAS3	GAOB1, MAAB	BCAS3 microtubule associated cell migration factor	breast carcinoma-amplified sequence 3|BCAS4/BCAS3 fusion|Rudhira|breast carcinoma amplified sequence 4/3 fusion protein|metastasis associated antigen of breast cancer|protein Maab1	17q23.2	17	NC_000017.11	60677851	61392831	plus	40	607470
9606	Homo sapiens	53340	0	live	SPA17	CT22, SP17, SP17-1	sperm autoantigenic protein 17	sperm surface protein Sp17|cancer/testis antigen 22|sperm protein 17	11q24.2	11	NC_000011.10	124673844	124694794	plus	6	608621
9606	Homo sapiens	7132	0	live	TNFRSF1A	CD120a, FPF, TBP1, TNF-R, TNF-R-I, TNF-R55, TNFAR, TNFR1, TNFR55, TNFR60, p55, p55-R, p60	TNF receptor superfamily member 1A	tumor necrosis factor receptor superfamily member 1A|TNF-R1|TNF-RI|TNFR-I|tumor necrosis factor binding protein 1|tumor necrosis factor receptor 1A isoform beta|tumor necrosis factor receptor type 1|tumor necrosis factor-alpha receptor	12p13.31	12	NC_000012.12	6328771	6342076	minus	11	191190
9606	Homo sapiens	650	0	live	BMP2	BDA2A, SSFSC, BMP2	bone morphogenetic protein 2	bone morphogenetic protein 2|bone morphogenetic protein 2A	20p12.3	20	NC_000020.11	6767686	6780246	plus	3	112261
9606	Homo sapiens	729873	0	live	TBC1D3	PRC17A, TBC1D3C, TBC1D3D, TBC1D3F, TBC1D3L, TBC1D3	TBC1 domain family member 3	TBC1 domain family member 3|Rab GTPase-activating protein PRC17|TBC1 domain family member 3C|TBC1 domain family member 3L|TBC1 domain family, member 3F|prostate cancer gene 17 protein|protein TRE17-alpha	17q12	17	NC_000017.11	38181476	38192555	minus	14	607741
9606	Homo sapiens	22891	0	live	ZNF365	Su48, UAND, ZNF365	zinc finger protein 365	protein ZNF365|DISC1-binding zinc-finger protein|protein su48|talanin	10q21.2	10	NC_000010.11	62374157	62672011	plus	18	607818
9606	Homo sapiens	653220	0	live	XAGE1A	CT12.1, CT12.1A, CT12.1B, CTP9, GAGED2, XAGE-1, XAGE1, XAGE1B	X antigen family member 1A	X antigen family member 1|G antigen family D member 2|G antigen, family D, 2|X antigen family member 1B|cancer/testis antigen 12.1|cancer/testis antigen family 12, member 1a|cancer/testis antigen family 12, member 1b|cancer/testis associated protein|protein XAGE-1	Xp11.22	X	NC_000023.11	52495668	52500815	plus	4	300742
9606	Homo sapiens	356	0	live	FASLG	ALPS1B, APT1LG1, APTL, CD178, CD95-L, CD95L, FASL, TNFSF6, TNLG1A	Fas ligand	tumor necrosis factor ligand superfamily member 6|CD95 ligand|Fas ligand (TNF superfamily, member 6)|apoptosis (APO-1) antigen ligand 1|apoptosis antigen ligand|fas antigen ligand|mutant tumor necrosis factor family member 6|tumor necrosis factor ligand 1A	1q24.3	1	NC_000001.11	172659008	172666876	plus	4	134638
9606	Homo sapiens	221120	0	live	ALKBH3	ABH3, DEPC-1, DEPC1, PCA1, hABH3	alkB homolog 3, alpha-ketoglutaratedependent dioxygenase	alpha-ketoglutarate-dependent dioxygenase alkB homolog 3|alkB homolog 3, alpha-ketoglutarate-dependent dioxygenase|alkB, alkylation repair homolog 3|alkylated DNA repair protein alkB homolog 3|prostate cancer antigen-1	11p11.2	11	NC_000011.10	43880831	43920274	plus	10	610603
9606	Homo sapiens	5888	0	live	RAD51	BRCC5, FANCR, HRAD51, HsRad51, HsT16930, MRMV2A, RECA, RAD51	RAD51 recombinase	DNA repair protein RAD51 homolog 1|BRCA1/BRCA2-containing complex, subunit 5|RAD51 homolog A|RecA, E. coli, homolog of|RecA-like protein|recombination protein A	15q15.1	15	NC_000015.10	40694774	40732340	plus	13	179617
9606	Homo sapiens	9798	0	live	IST1	CHMP8, OLC1	IST1 factor associated with ESCRT-III	IST1 homolog|IST1, ESCRT-III associated factor|IST1, endosomal sorting complex required for transport-III component|increased sodium tolerance 1 homolog|overexpressed in lung cancer 1|putative MAPK-activating protein PM28	16q22.2	16	NC_000016.10	71894408	71931199	plus	12	616434
9606	Homo sapiens	7027	0	live	TFDP1	DILC, DP1, DRTF1, Dp-1	transcription factor Dp-1	transcription factor Dp-1|DRTF1-polypeptide 1|E2F dimerization partner 1|E2F-related transcription factor|down-regulated in liver cancer stem cells	13q34	13	NC_000013.11	113584688	113641473	plus	14	189902
9606	Homo sapiens	8852	0	live	AKAP4	AKAP 82, AKAP-4, AKAP82, CT99, FSC1, HI, PRKA4, hAKAP82, p82	A-kinase anchoring protein 4	A-kinase anchor protein 4|A kinase (PRKA) anchor protein 4|A-kinase anchor protein 82 kDa|cancer/testis antigen 99|epididymis secretory sperm binding protein|major sperm fibrous sheath protein|protein kinase A anchoring protein 4|testis-specific gene HI	Xp11.22	X	NC_000023.11	50190777	50201007	minus	7	300185
9606	Homo sapiens	9940	0	live	DLEC1	CFAP81, DLC-1, DLC1, F56	DLEC1 cilia and flagella associated protein	deleted in lung and esophageal cancer protein 1|DLEC, cilia and flagella associated protein|cilia and flagella associated protein 81|deleted in lung and esophageal cancer 1	3p22.2	3	NC_000003.12	38038595	38124025	plus	38	604050
9606	Homo sapiens	4088	0	live	SMAD3	HSPC193, HsT17436, JV15-2, LDS1C, LDS3, MADH3	SMAD family member 3	mothers against decapentaplegic homolog 3|MAD homolog 3|MAD, mothers against decapentaplegic homolog 3|SMA- and MAD-related protein 3|SMAD, mothers against DPP homolog 3|hMAD-3|hSMAD3|mad homolog JV15-2|mad protein homolog|mad3|mothers against DPP homolog 3	15q22.33	15	NC_000015.10	67065602	67195195	plus	13	603109
9606	Homo sapiens	7422	0	live	VEGFA	MVCD1, VEGF, VPF	vascular endothelial growth factor A	vascular endothelial growth factor A|vascular endothelial growth factor A121|vascular endothelial growth factor A165|vascular permeability factor	6p21.1	6	NC_000006.12	43770209	43786487	plus	9	192240
9606	Homo sapiens	151648	0	live	SGO1	CAID, NY-BR-85, SGO, SGOL1	shugoshin 1	shugoshin 1|serologically defined breast cancer antigen NY-BR-85|shugoshin 1AB protein|shugoshin 1CD protein|shugoshin 1EF protein|shugoshin 1GH protein|shugoshin 1KL protein	3p24.3	3	NC_000003.12	20160593	20188143	minus	11	609168
9606	Homo sapiens	29086	0	live	BABAM1	C19orf62, HSPC142, MERIT40, NBA1	BRISC and BRCA1 A complex member 1	BRISC and BRCA1-A complex member 1|BRCA1-A complex subunit MERIT40|mediator of RAP80 interactions and targeting subunit of 40 kDa|mediator of Rap80 interactions and targeting 40 kDa|new component of the BRCA1-A complex|new component of the BRCAA1 A complex	19p13.11	19	NC_000019.10	17267376	17279353	plus	9	612766
9606	Homo sapiens	1586	0	live	CYP17A1	CPT7, CYP17, P450C17, S17AH	cytochrome P450 family 17 subfamily A member 1	steroid 17-alpha-hydroxylase/17,20 lyase|17-alpha-hydroxyprogesterone aldolase|CYPXVII|cytochrome P450 17A1|cytochrome P450, family 17, subfamily A, polypeptide 1|cytochrome P450, subfamily XVII (steroid 17-alpha-hydroxylase), adrenal hyperplasia|cytochrome P450-C17|cytochrome P450c17|cytochrome p450 XVIIA1|steroid 17-alpha-monooxygenase	10q24.32	10	NC_000010.11	102830531	102837413	minus	8	609300
9606	Homo sapiens	2309	0	live	FOXO3	AF6q21, FKHRL1, FKHRL1P2, FOXO2A, FOXO3	forkhead box O3	forkhead box protein O3|forkhead box O3A|forkhead homolog (rhabdomyosarcoma) like 1|forkhead in rhabdomyosarcoma-like 1|forkhead, Drosophila, homolog of, in rhabdomyosarcoma-like 1	6q21	6	NC_000006.12	108559825	108684774	plus	9	602681
9606	Homo sapiens	2322	0	live	FLT3	CD135, FLK-2, FLK2, STK1	fms related receptor tyrosine kinase 3	receptor-type tyrosine-protein kinase FLT3|CD135 antigen|FL cytokine receptor|fetal liver kinase 2|fms related tyrosine kinase 3|fms-like tyrosine kinase 3|growth factor receptor tyrosine kinase type III|stem cell tyrosine kinase 1	13q12.2	13	NC_000013.11	28003274	28100587	minus	27	136351
9606	Homo sapiens	100507436	0	live	MICA	MIC-A, PERB11.1	MHC class I polypeptide-related sequence A	MHC class I polypeptide-related sequence A|HLA class I antigen|MHC class I chain-related protein A|MHC class I related chain A|MHC class I related sequence A|major histocompatibility complex class I chain-related protein A|stress inducible class I homolog|truncated MHC class I polypeptide-related sequence A|truncated MICA	6p21.33	6	NC_000006.12	31400711	31415315	plus	7	600169
9606	Homo sapiens	3569	0	live	IL6	BSF-2, BSF2, CDF, HGF, HSF, IFN-beta-2, IFNB2, IL-6	interleukin 6	interleukin-6|B-cell differentiation factor|B-cell stimulatory factor 2|CTL differentiation factor|hybridoma growth factor|interferon beta-2|interleukin BSF-2	7p15.3	7	NC_000007.14	22725889	22732002	plus	6	147620
9606	Homo sapiens	10806	0	live	SDCCAG8	BBS16, CCCAP, CCCAP SLSN7, HSPC085, NPHP10, NY-CO-8, SLSN7, hCCCAP	serologically defined colon cancer antigen 8	serologically defined colon cancer antigen 8|Bardet-Biedl syndrome 16|antigen NY-CO-8|centrosomal colon cancer autoantigen protein|nephrocystin 10	1q43-q44	1	NC_000001.11	243255418	243503683	plus	27	613524
9606	Homo sapiens	653067	0	live	XAGE1B	CT12.1, CT12.1C, CT12.1D, CT12.1E, CT12.1b, CTP9, GAGED2, XAGE-1, XAGE1, XAGE1C, XAGE1D, XAGE1E	X antigen family member 1B	X antigen family member 1|G antigen family D member 2|X antigen family member 1E|X antigen family, member 1C|X antigen family, member 1D|cancer/testis antigen 12.1|cancer/testis antigen family 12, member 1b|cancer/testis antigen family 12, member 1c|cancer/testis antigen family 12, member 1d|cancer/testis antigen family 12, member 1e|cancer/testis associated protein|protein XAGE-1	Xp11.22	X	NC_000023.11	52512074	52517221	minus	4	300289,300744,300745
9606	Homo sapiens	3084	0	live	NRG1	ARIA, GGF, GGF2, HGL, HRG, HRG1, HRGA, MST131, MSTP131, NDF-IT2, SMDF, NRG1	neuregulin 1	pro-neuregulin-1, membrane-bound isoform|acetylcholine receptor-inducing activity|glial growth factor 2|heregulin, alpha (45kD, ERBB2 p185-activator)|neu differentiation factor|pro-NRG1|sensory and motor neuron derived factor	8p12	8	NC_000008.11	31639245	32774046	plus	19	142445
9606	Homo sapiens	64002	0	live	PCGEM1	LINC00071, NCRNA00071, PCAT9	PCGEM1 prostate-specific transcript	PCGEM1, prostate-specific transcript (non-protein coding)|long intergenic non-protein coding RNA 71|prostate cancer associated transcript 9|prostate cancer gene expression marker 1|prostate-specific transcript 1 (non-protein coding)	2q32.3	2	NC_000002.12	192749845	192776899	plus	4	605443
9606	Homo sapiens	5619	0	live	PRM1	CT94.1, P1	protamine 1	sperm protamine P1|cancer/testis antigen family 94, member 1|cysteine-rich protamine|testicular tissue protein Li 91|testis specific protamine 1	16p13.13	16	NC_000016.10	11280841	11281330	minus	2	182880
9606	Homo sapiens	23641	0	live	LDOC1	BCUR1, Mar7, Mart7, RTL7, SIRH7	LDOC1 regulator of NFKB signaling	protein LDOC1|Sushi-Ichi retrotransposon homolog 7|breast cancer, up-regulated 1|leucine zipper down-regulated in cancer 1|leucine zipper downregulated in cancer|leucine zipper protein down-regulated in cancer cells|mammalian retrotransposon-derived 7|retrotransposon Gag like 7	Xq27.1	X	NC_000023.11	141173235	141177129	minus	1	300402
9606	Homo sapiens	6756	0	live	SSX1	CT5.1, SSRC	SSX family member 1	protein SSX1|cancer/testis antigen 5.1|cancer/testis antigen family 5, member 1|sarcoma, synovial, X-chromosome-related 1|synovial sarcoma, X breakpoint 1	Xp11.23	X	NC_000023.11	48255392	48267444	plus	9	312820
9606	Homo sapiens	4824	0	live	NKX3-1	BAPX2, NKX3, NKX3.1, NKX3A	NK3 homeobox 1	homeobox protein Nkx-3.1|NK homeobox, family 3, A|NK3 transcription factor homolog A|NK3 transcription factor related, locus 1|homeobox protein NK-3 homolog A	8p21.2	8	NC_000008.11	23678693	23682938	minus	4	602041
9606	Homo sapiens	1620	0	live	BRINP1	DBC1, DBCCR1, FAM5A	BMP/retinoic acid inducible neural specific 1	BMP/retinoic acid-inducible neural-specific protein 1|bA574M5.1 (deleted in bladder cancer chromosome region candidate 1 (IB3089A))|bone morphogenetic protein/retinoic acid inducible neural-specific 1|bone morphogenic protein/retinoic acid inducible neural-specific 1|deleted in bladder cancer 1|deleted in bladder cancer chromosome region candidate 1|deleted in bladder cancer protein 1	9q33.1	9	NC_000009.12	119166629	119369435	minus	8	602865
9606	Homo sapiens	6785	0	live	ELOVL4	ADMD, CT118, ISQMR, SCA34, STGD2, STGD3	ELOVL fatty acid elongase 4	elongation of very long chain fatty acids protein 4|3-keto acyl-CoA synthase ELOVL4|ELOVL FA elongase 4|cancer/testis antigen 118|elongation of very long chain fatty acids (FEN1/Elo2, SUR4/Elo3, yeast)-like 4|very long chain 3-ketoacyl-CoA synthase 4|very long chain 3-oxoacyl-CoA synthase 4	6q14.1	6	NC_000006.12	79914814	79947553	minus	6	605512
9606	Homo sapiens	6531	0	live	SLC6A3	DAT, DAT1, PKDYS, PKDYS1	solute carrier family 6 member 3	sodium-dependent dopamine transporter|DA transporter|dopamine transporter 1|solute carrier family 6 (neurotransmitter transporter), member 3|solute carrier family 6 (neurotransmitter transporter, dopamine), member 3	5p15.33	5	NC_000005.10	1392794	1445440	minus	15	126455
9606	Homo sapiens	9947	0	live	MAGEC1	CT7, CT7.1	MAGE family member C1	melanoma-associated antigen C1|MAGE-C1 antigen|cancer/testis antigen 7.1|cancer/testis antigen family 7, member 1|melanoma antigen family C, 1|melanoma antigen family C1	Xq27.2	X	NC_000023.11	141903877	141909401	plus	4	300223
9606	Homo sapiens	5620	0	live	PRM2	CT94.2	protamine 2	protamine-2|cancer/testis antigen family 94, member 2|sperm histone P2|sperm protamine P2|testicular secretory protein Li 40	16p13.13	16	NC_000016.10	11275639	11276480	minus	2	182890
9606	Homo sapiens	4524	0	live	MTHFR		methylenetetrahydrofolate reductase	methylenetetrahydrofolate reductase|5,10-methylenetetrahydrofolate reductase (NADPH)|methylenetetrahydrofolate reductase (NAD(P)H)	1p36.22	1	NC_000001.11	11785723	11806103	minus	12	607093
9606	Homo sapiens	5889	0	live	RAD51C	BROVCA3, FANCO, R51H3, RAD51L2	RAD51 paralog C	DNA repair protein RAD51 homolog 3|RAD51-like protein 2|yeast RAD51 homolog 3	17q22	17	NC_000017.11	58692140	58735611	plus	12	602774
9606	Homo sapiens	200504	0	live	GKN2	BRICD1B, GDDR, PRO813, TFIZ1, VLTI465	gastrokine 2	gastrokine-2|BRICHOS domain containing 1B|blottin|down-regulated in gastric cancer GDDR|trefoil factor interactions(z) 1	2p13.3	2	NC_000002.12	68945232	68952893	minus	6	618589
9606	Homo sapiens	3593	0	live	IL12B	CLMF, CLMF2, IL-12B, IMD28, IMD29, NKSF, NKSF2	interleukin 12B	interleukin-12 subunit beta|CLMF p40|IL-12 subunit p40|IL12, subunit p40|NK cell stimulatory factor chain 2|cytotoxic lymphocyte maturation factor 40 kDa subunit|interleukin 12, p40|interleukin 12B (natural killer cell stimulatory factor 2, cytotoxic lymphocyte maturation factor 2, p40)|interleukin-12 beta chain|natural killer cell stimulatory factor, 40 kD subunit	5q33.3	5	NC_000005.10	159314780	159330487	minus	8	161561
9606	Homo sapiens	29789	0	live	OLA1	DOC45, GBP45, GTBP9, GTPBP9, PTD004	Obg like ATPase 1	obg-like ATPase 1|DNA damage-regulated overexpressed in cancer 45 protein|GTP-binding protein 9 (putative)|GTP-binding protein PTD004|homologous yeast-44.2 protein	2q31.1	2	NC_000002.12	174072447	174248532	minus	11	611175
9606	Homo sapiens	10927	0	live	SPIN1	SPIN, TDRD24	spindlin 1	spindlin-1|ovarian cancer-related protein|spindlin1	9q22.1	9	NC_000009.12	88388444	88478694	plus	6	609936
9606	Homo sapiens	23405	0	live	DICER1	DCR1, Dicer, Dicer1e, GLOW, HERNA, K12H4.8-LIKE, MNG1, RMSE2	dicer 1, ribonuclease III	endoribonuclease Dicer|Dicer1, Dcr-1 homolog|dicer 1, double-stranded RNA-specific endoribonuclease|dicer 1, ribonuclease type III|helicase MOI|helicase with RNAse motif	14q32.13	14	NC_000014.9	95086228	95158263	minus	35	606241
9606	Homo sapiens	30848	0	live	CTAG2	CAMEL, CT2, CT6.2, CT6.2a, CT6.2b, ESO2, LAGE-1, LAGE2B	cancer/testis antigen 2	cancer/testis antigen 2|CTL-recognized antigen on melanoma|LAGE-1a protein|autoimmunogenic cancer/testis antigen NY-ESO-2|cancer/testis antigen 6.2|cancer/testis antigen family 6, member 2a|cancer/testis antigen family 6, member 2b|l antigen family member 1	Xq28	X	NC_000023.11	154651972	154653579	minus	3	300396
9606	Homo sapiens	23054	0	live	NCOA6	AIB3, ASC2, NRC, PRIP, RAP250, TRBP	nuclear receptor coactivator 6	nuclear receptor coactivator 6|NRC RAP250|PPAR-interacting protein|activating signal cointegrator-2|amplified in breast cancer protein 3|amplified in breast cancer-3 protein|cancer-amplified transcriptional coactivator ASC-2|nuclear receptor coactivator RAP250|nuclear receptor-activating protein, 250 kDa|peroxisome proliferator-activated receptor interacting protein|thyroid hormone receptor bindi…	20q11.22	20	NC_000020.11	34714774	34825651	minus	20	605299
9606	Homo sapiens	1544	0	live	CYP1A2	CP12, CYPIA2, P3-450, P450(PA)	cytochrome P450 family 1 subfamily A member 2	cytochrome P450 1A2|P450 form 4|aryl hydrocarbon hydroxylase|cholesterol 25-hydroxylase|cytochrome P(3)450|cytochrome P450 4|cytochrome P450, family 1, subfamily A, polypeptide 2|cytochrome P450, subfamily I (aromatic compound-inducible), polypeptide 2|cytochrome P450-P3|dioxin-inducible P3-450|flavoprotein-linked monooxygenase|hydroperoxy icosatetraenoate dehydratase|microsomal monooxygenase|xen…	15q24.1	15	NC_000015.10	74748845	74756607	plus	7	124060
9606	Homo sapiens	3948	0	live	LDHC	CT32, LDH3, LDHX	lactate dehydrogenase C	L-lactate dehydrogenase C chain|LDH testis subunit|LDH-C|LDH-X|cancer/testis antigen 32|lactate dehydrogenase C4|lactate dehydrogenase c variant 1|lactate dehydrogenase c variant 3|lactate dehydrogenase c variant 4|lactate dehydrogenase c variant 5|testis secretory sperm-binding protein Li 234P	11p15.1	11	NC_000011.10	18412298	18452063	plus	8	150150
9606	Homo sapiens	7430	0	live	EZR	CVIL, CVL, HEL-S-105, VIL2	ezrin	ezrin|cytovillin 2|epididymis secretory protein Li 105|p81|villin 2 (ezrin)	6q25.3	6	NC_000006.12	158765744	158819368	minus	14	123900
9606	Homo sapiens	6850	0	live	SYK	p72-Syk	spleen associated tyrosine kinase	tyrosine-protein kinase SYK|spleen tyrosine kinase	9q22.2	9	NC_000009.12	90801600	90898549	plus	16	600085
9606	Homo sapiens	51776	0	live	MAP3K20	AZK, CNM6, MLK7, MLT, MLTK, MLTKalpha, MLTKbeta, MRK, SFMMP, ZAK, mlklak, pk	mitogen-activated protein kinase kinase kinase 20	mitogen-activated protein kinase kinase kinase 20|HCCS-4|MLK-like mitogen-activated protein triple kinase|ZAK1 homolog, leucine zipper and sterile-alpha motif kinase|human cervical cancer suppressor gene 4 protein|mitogen-activated protein kinase kinase kinase MLT|mixed lineage kinase 7|mixed lineage kinase with a leucine zipper and a sterile alpha motif|mixed lineage kinase-related kinase MRK-be…	2q31.1	2	NC_000002.12	173075435	173268015	plus	23	609479
9606	Homo sapiens	200315	0	live	APOBEC3A	A3A, ARP3, PHRBN, bK150C2.1	apolipoprotein B mRNA editing enzyme catalytic subunit 3A	DNA dC->dU-editing enzyme APOBEC-3A|apolipoprotein B mRNA editing enzyme, catalytic polypeptide-like 3A|phorbolin-1|probable DNA dC->dU-editing enzyme APOBEC-3A	22q13.1	22	NC_000022.11	38957609	38963184	plus	5	607109
9606	Homo sapiens	29122	0	live	PRSS50	CT20, TSP50	serine protease 50	probable threonine protease PRSS50|cancer/testis antigen 20|protease, serine 50|testes-specific protease 50|testicular tissue protein Li 210|testis-specific protease-like protein 50	3p21.31	3	NC_000003.12	46712117	46717869	minus	6	607950
9606	Homo sapiens	4110	0	live	MAGEA11	CT1.11, MAGE-11, MAGE11, MAGEA-11	MAGE family member A11	melanoma-associated antigen 11|MAGE-11 antigen|cancer/testis antigen 1.11|cancer/testis antigen family 1, member 11|melanoma antigen family A, 11|melanoma antigen family A11	Xq28	X	NC_000023.11	149688193	149717268	plus	9	300344
9606	Homo sapiens	4316	0	live	MMP7	MMP-7, MPSL1, PUMP-1	matrix metallopeptidase 7	matrilysin|matrin|matrix metallopeptidase 7 (matrilysin, uterine)|matrix metalloproteinase 7 (matrilysin, uterine)|matrix metalloproteinase-7|pump-1 protease|uterine matrilysin|uterine metalloproteinase	11q22.2	11	NC_000011.10	102520508	102530747	minus	6	178990
9606	Homo sapiens	25875	0	live	LETMD1	1110019O13Rik, HCCR, HCCR-1, HCCR-2, HCCR1, HCCR2, HCRR-2, SLC55A3	LETM1 domain containing 1	LETM1 domain-containing protein 1|cervical cancer 1 proto-oncogene protein p40|cervical cancer proto-oncogene 2 protein|epididymis secretory sperm binding protein|human cervical cancer oncogene|regulator of TP53	12q13.12	12	NC_000012.12	51048220	51068958	plus	11
9606	Homo sapiens	11339	0	live	OIP5	5730547N13Rik, CT86, LINT-25, MIS18B, MIS18beta, hMIS18beta	Opa interacting protein 5	protein Mis18-beta|LAP2alpha interactor-25|MIS18 kinetochore protein homolog B|cancer/testis antigen 86|opa-interacting protein 5	15q15.1	15	NC_000015.10	41309268	41332621	minus	5	606020
9606	Homo sapiens	23112	0	live	TNRC6B		trinucleotide repeat containing adaptor 6B	trinucleotide repeat-containing gene 6B protein|trinucleotide repeat containing 6B	22q13.1	22	NC_000022.11	40044817	40335808	plus	27	610740
9606	Homo sapiens	6738	0	live	RO60	RORNP, SSA2, TROVE2	Ro60, Y RNA binding protein	60 kDa SS-A/Ro ribonucleoprotein|60 kDa ribonucleoprotein Ro|Ro/SSA 60kDa|Sjogren syndrome antigen A2 (60kD, ribonucleoprotein autoantigen SS-A/Ro)|TROVE domain family member 2|gastric cancer multi-drug resistance protein|ro60 autoantigen|sjoegren syndrome type A antigen	1q31.2	1	NC_000001.11	193059454	193091777	plus	12	600063
9606	Homo sapiens	7517	0	live	XRCC3	CMM6	X-ray repair cross complementing 3	DNA repair protein XRCC3|X-ray repair complementing defective repair in Chinese hamster cells 3|X-ray repair cross-complementing protein 3	14q32.33	14	NC_000014.9	103697611	103715486	minus	10	600675
9606	Homo sapiens	400500	0	live	BCAR4		breast cancer anti-estrogen resistance 4	breast cancer anti-estrogen resistance 4 (non-protein coding)|breast cancer antiestrogen resistance 4 protein	16p13.13	16	NC_000016.10	11819830	11828832	minus	5	613746
9606	Homo sapiens	11086	0	live	ADAM29	CT73, svph1	ADAM metallopeptidase domain 29	disintegrin and metalloproteinase domain-containing protein 29|a disintegrin and metalloproteinase domain 29|cancer/testis antigen 73|epididymis secretory sperm binding protein|metallaproteinase-disintegrin (ADAM29)|testis secretory sperm-binding protein Li 207a	4q34.1	4	NC_000004.12	174918358	174978180	plus	9	604778
9606	Homo sapiens	23201	0	live	FAM168A	KIAA0280, TCRP1	family with sequence similarity 168 member A	protein FAM168A|tongue cancer chemotherapy resistance-associated protein 1	11q13.4	11	NC_000011.10	73400487	73598112	minus	9	616316
9606	Homo sapiens	7046	0	live	TGFBR1	AAT5, ACVRLK4, ALK-5, ALK5, ESS1, LDS1, LDS1A, LDS2A, MSSE, SKR4, TBR-i, TBRI, TGFR-1, tbetaR-I	transforming growth factor beta receptor 1	TGF-beta receptor type-1|activin A receptor type II-like kinase, 53kDa|activin A receptor type II-like protein kinase of 53kD|activin receptor-like kinase 5|mutant transforming growth factor beta receptor I|serine/threonine-protein kinase receptor R4|transforming growth factor beta receptor I|transforming growth factor-beta receptor type I	9q22.33	9	NC_000009.12	99104038	99154192	plus	11	190181
9606	Homo sapiens	60500	0	live	BRCA3	BRCAX	breast cancer 3	Breast cancer, type 3	13q21	13						605365
9606	Homo sapiens	545	0	live	ATR	FCTCS, FRP1, MEC1, SCKL, SCKL1	ATR serine/threonine kinase	serine/threonine-protein kinase ATR|FRAP-related protein-1|MEC1, mitosis entry checkpoint 1, homolog|ataxia telangiectasia and Rad3-related protein	3q23	3	NC_000003.12	142449235	142578793	minus	49	601215
9606	Homo sapiens	57178	0	live	ZMIZ1	MIZ, NEDDFSA, RAI17, TRAFIP10, ZIMP10	zinc finger MIZ-type containing 1	zinc finger MIZ domain-containing protein 1|retinoic acid induced 17|zinc finger-containing, Miz1, PIAS-like protein on chromosome 10	10q22.3	10	NC_000010.11	79068966	79316519	plus	30	607159
9606	Homo sapiens	4157	0	live	MC1R	CMM5, MSH-R, SHEP2	melanocortin 1 receptor	melanocyte-stimulating hormone receptor|MC1-R|alpha melanocyte stimulating hormone receptor|melanotropin receptor	16q24.3	16	NC_000016.10	89917879	89920977	plus	1	155555
9606	Homo sapiens	5268	0	live	SERPINB5	PI5, maspin	serpin family B member 5	serpin B5|PI-5|peptidase inhibitor 5|protease inhibitor 5 (maspin)|serine (or cysteine) proteinase inhibitor, clade B (ovalbumin), member 5|serpin peptidase inhibitor, clade B (ovalbumin), member 5	18q21.33	18	NC_000018.10	63476958	63505085	plus	8	154790
9606	Homo sapiens	5562	0	live	PRKAA1	AMPK, AMPKa1	protein kinase AMP-activated catalytic subunit alpha 1	5'-AMP-activated protein kinase catalytic subunit alpha-1|5'-AMP-activated protein kinase, catalytic alpha-1 chain|ACACA kinase|AMP -activate kinase alpha 1 subunit|AMP-activated protein kinase, catalytic, alpha-1|AMPK alpha 1|AMPK subunit alpha-1|HMGCR kinase|acetyl-CoA carboxylase kinase|hydroxymethylglutaryl-CoA reductase kinase|protein kinase, AMP-activated, alpha 1 catalytic subunit|tau-prot…	5p13.1	5	NC_000005.10	40759379	40798195	minus	12	602739
9606	Homo sapiens	55355	0	live	HJURP	FAKTS, URLC9, hFLEG1	Holliday junction recognition protein	Holliday junction recognition protein|14-3-3-associated AKT substrate|fetal liver expressing gene 1|fetal liver-expressing gene 1 protein|up-regulated in lung cancer 9	2q37.1	2	NC_000002.12	233836701	233854566	minus	9	612667
9606	Homo sapiens	652	0	live	BMP4	BMP2B, BMP2B1, MCOPS6, OFC11, ZYME	bone morphogenetic protein 4	bone morphogenetic protein 4|bone morphogenetic protein 2B	14q22.2	14	NC_000014.9	53949736	53956891	minus	6	112262
9606	Homo sapiens	9861	0	live	PSMD6	Rpn7, S10, SGA-113M, p42A, p44S10	proteasome 26S subunit, non-ATPase 6	26S proteasome non-ATPase regulatory subunit 6|breast cancer-associated protein SGA-113M|phosphonoformate immuno-associated protein 4|proteasome (prosome, macropain) 26S subunit, non-ATPase, 6|proteasome regulatory particle subunit p44S10	3p14.1	3	NC_000003.12	64010549	64024010	minus	11	617857
9606	Homo sapiens	11178	0	live	LZTS1	F37, FEZ1	leucine zipper tumor suppressor 1	leucine zipper putative tumor suppressor 1|F37/Esophageal cancer-related gene-coding leucine-zipper motif|leucine zipper, putative tumor suppressor 1	8p21.3	8	NC_000008.11	20246165	20303963	minus	8	606551
9606	Homo sapiens	3586	0	live	IL10	CSIF, GVHDS, IL-10A, TGIF, IL10	interleukin 10	interleukin-10|T-cell growth inhibitory factor|cytokine synthesis inhibitory factor	1q32.1	1	NC_000001.11	206767602	206772494	minus	5	124092
9606	Homo sapiens	2272	0	live	FHIT	AP3Aase, FRA3B	fragile histidine triad diadenosine triphosphatase	bis(5'-adenosyl)-triphosphatase|AP3A hydrolase|diadenosine 5',5'''-P1,P3-triphosphate hydrolase|dinucleosidetriphosphatase	3p14.2	3	NC_000003.12	59747277	61251461	minus	17	601153
9606	Homo sapiens	3091	0	live	HIF1A	HIF-1-alpha, HIF-1A, HIF-1alpha, HIF1, HIF1-ALPHA, MOP1, PASD8, bHLHe78	hypoxia inducible factor 1 subunit alpha	hypoxia-inducible factor 1-alpha|ARNT interacting protein|PAS domain-containing protein 8|basic-helix-loop-helix-PAS protein MOP1|class E basic helix-loop-helix protein 78|hypoxia inducible factor 1 alpha subunit|hypoxia inducible factor 1, alpha subunit (basic helix-loop-helix transcription factor)|hypoxia-inducible factor 1 alpha isoform I.3|hypoxia-inducible factor1alpha|member of PAS protein …	14q23.2	14	NC_000014.9	61695513	61748259	plus	16	603348
9606	Homo sapiens	6662	0	live	SOX9	CMD1, CMPD1, SRA1, SRXX2, SRXY10	SRY-box transcription factor 9	transcription factor SOX-9|SRY (sex determining region Y)-box9|SRY (sex-determining region Y)-box 9 protein|SRY-box 9|SRY-related HMG-box, gene 9	17q24.3	17	NC_000017.11	72121020	72126416	plus	3	608160
9606	Homo sapiens	1636	0	live	ACE	ACE1, CD143, DCP, DCP1	angiotensin I converting enzyme	angiotensin-converting enzyme|CD143 antigen|angiotensin I converting enzyme (peptidyl-dipeptidase A) 1|angiotensin converting enzyme, somatic isoform|carboxycathepsin|dipeptidyl carboxypeptidase 1|dipeptidyl carboxypeptidase I|kininase II|peptidase P	17q23.3	17	NC_000017.11	63477061	63498373	plus	26	106180
9606	Homo sapiens	5957	0	live	RCVRN	RCV1	recoverin	recoverin|cancer associated retinopathy antigen|cancer-associated retinopathy protein	17p13.1	17	NC_000017.11	9896320	9905271	minus	3	179618
9606	Homo sapiens	6581	0	live	SLC22A3	EMT, EMTH, OCT3	solute carrier family 22 member 3	solute carrier family 22 member 3|EMT organic cation transporter 3|extraneuronal monoamine transporter|organic cation transporter 3|solute carrier family 22 (extraneuronal monoamine transporter), member 3|solute carrier family 22 (organic cation transporter), member 3	6q25.3	6	NC_000006.12	160348378	160454982	plus	15	604842
9606	Homo sapiens	57119	0	live	EPPIN	CT71, CT72, SPINLW1, WAP7, WFDC7, dJ461P17.2	epididymal peptidase inhibitor	eppin|WAP four-disulfide core domain protein 7|cancer/testis antigen 71|cancer/testis antigen 72|epididymal protease inhibitor|epididymis secretory sperm binding protein|protease inhibitor WAP7|serine peptidase inhibitor-like, with Kunitz and WAP domains 1 (eppin)	20q13.12	20	NC_000020.11	45540626	45547401	minus	4	609031
9606	Homo sapiens	351	0	live	APP	AAA, ABETA, ABPP, AD1I, CTFgamma, CVAP, PN-II, PN2, preA4, APP	amyloid beta precursor protein	amyloid-beta precursor protein|alzheimer disease amyloid protein|amyloid beta (A4) precursor protein|amyloid beta A4 protein|amyloid precursor protein|beta-amyloid peptide|beta-amyloid peptide(1-40)|beta-amyloid peptide(1-42)|beta-amyloid precursor protein|cerebral vascular amyloid peptide|peptidase nexin-II|protease nexin-II|testicular tissue protein Li 2	21q21.3	21	NC_000021.9	25880550	26171128	minus	20	104760
9606	Homo sapiens	8715	0	live	NOL4	CT125, HRIHFB2255, NOLP	nucleolar protein 4	nucleolar protein 4|cancer/testis antigen 125|nucleolar localized protein	18q12.1	18	NC_000018.10	33851100	34224957	minus	22	603577
9606	Homo sapiens	27257	0	live	LSM1	CASM, YJL124C	LSM1 homolog, mRNA degradation associated	U6 snRNA-associated Sm-like protein LSm1|LSM1 homolog, U6 small nuclear RNA associated|LSM1 mRNA degradation associated|LSM1, U6 small nuclear RNA associated|LSM1-like protein U6 small nuclear RNA associated|cancer-associated Sm protein|cancer-associated Sm-like protein|small nuclear ribonuclear CaSm	8p11.23	8	NC_000008.11	38163321	38176730	minus	4	607281
9606	Homo sapiens	6464	0	live	SHC1	SHC, SHCA	SHC adaptor protein 1	SHC-transforming protein 1|SH2 domain protein C1|SHC (Src homology 2 domain containing) transforming protein 1|SHC-transforming protein 3|SHC-transforming protein A	1q21.3	1	NC_000001.11	154962298	154974492	minus	14	600560
9606	Homo sapiens	4101	0	live	MAGEA2	CT1.2, MAGE2A, MAGEA2	MAGE family member A2	melanoma-associated antigen 2|MAGE-2 antigen|cancer/testis antigen 1.2|cancer/testis antigen family 1, member 2|melanoma antigen 2|melanoma antigen family A, 2|melanoma antigen family A2	Xq28	X	NC_000023.11	152749863	152753942	minus	7	300173
9606	Homo sapiens	10916	0	live	MAGED2	11B6, BARTS5, BCG-1, BCG1, HCA10, MAGE-D2	MAGE family member D2	melanoma-associated antigen D2|MAGE-D2 antigen|breast cancer-associated gene 1 protein|hepatocellular carcinoma-associated protein JCL-1|melanoma antigen family D, 2|melanoma antigen family D2	Xp11.21	X	NC_000023.11	54807745	54816015	plus	15	300470
9606	Homo sapiens	2492	0	live	FSHR	FSHR1O, LGR1, ODG1, FSHR	follicle stimulating hormone receptor	follicle-stimulating hormone receptor|FSH receptor|follitropin receptor	2p16.3	2	NC_000002.12	48953161	49154527	minus	14	136435
9606	Homo sapiens	2690	0	live	GHR	GHBP, GHIP	growth hormone receptor	growth hormone receptor|GH receptor|growth hormone binding protein|serum binding protein|somatotropin receptor	5p13.1-p12	5	NC_000005.10	42423439	42721878	plus	18	600946
9606	Homo sapiens	4072	0	live	EPCAM	DIAR5, EGP-2, EGP314, EGP40, ESA, HNPCC8, KS1/4, KSA, M4S1, MIC18, MK-1, TACSTD1, TROP1	epithelial cell adhesion molecule	epithelial cell adhesion molecule|adenocarcinoma-associated antigen|cell surface glycoprotein Trop-1|epithelial glycoprotein 314|human epithelial glycoprotein-2|major gastrointestinal tumor-associated protein GA733-2|membrane component, chromosome 4, surface marker (35kD glycoprotein)|trophoblast cell surface antigen 1|tumor-associated calcium signal transducer 1	2p21	2	NC_000002.12	47369311	47387020	plus	9	185535
9606	Homo sapiens	11093	0	live	ADAMTS13	ADAM-TS13, ADAMTS-13, C9orf8, VWFCP, vWF-CP	ADAM metallopeptidase with thrombospondin type 1 motif 13	A disintegrin and metalloproteinase with thrombospondin motifs 13|a disintegrin-like and metalloprotease (reprolysin type) with thrombospondin type 1 motif, 13|vWF-cleaving protease|von Willebrand factor-cleaving protease	9q34.2	9	NC_000009.12	133414339	133459403	plus	31	604134
9606	Homo sapiens	56155	0	live	TEX14	CT113, SPGF23	testis expressed 14, intercellular bridge forming factor	inactive serine/threonine-protein kinase TEX14|cancer/testis antigen 113|protein kinase-like protein SgK307|sugen kinase 307|testis-expressed protein 14|testis-expressed sequence 14 protein	17q22	17	NC_000017.11	58556677	58692055	minus	35	605792
9606	Homo sapiens	387103	0	live	CENPW	C6orf173, CENP-W, CUG2	centromere protein W	centromere protein W|cancer-up-regulated gene 2 protein|cancer-upregulated gene 2	6q22.32	6	NC_000006.12	126339696	126483320	plus	5	611264
9606	Homo sapiens	4318	0	live	MMP9	CLG4B, GELB, MANDP2, MMP-9	matrix metallopeptidase 9	matrix metalloproteinase-9|macrophage gelatinase|matrix metallopeptidase 9 (gelatinase B, 92kDa gelatinase, 92kDa type IV collagenase)|matrix metalloproteinase 9 (gelatinase B, 92kDa gelatinase, 92kDa type IV collagenase)|type V collagenase	20q13.12	20	NC_000020.11	46008908	46016561	plus	13	120361
9606	Homo sapiens	1045	0	live	CDX2	CDX-3/AS, CDX3, CDX2	caudal type homeobox 2	homeobox protein CDX-2|caudal type homeobox transcription factor 2|caudal-type homeobox protein 2|homeobox protein miniCDX2	13q12.2	13	NC_000013.11	27960918	27969368	minus	4	600297
9606	Homo sapiens	125	0	live	ADH1B	ADH2, HEL-S-117	alcohol dehydrogenase 1B (class I), beta polypeptide	all-trans-retinol dehydrogenase [NAD(+)] ADH1B|ADH, beta subunit|alcohol dehydrogenase 2 (class I), beta polypeptide|alcohol dehydrogenase subunit beta|aldehyde reductase|epididymis secretory protein Li 117	4q23	4	NC_000004.12	99304971	99321401	minus	10	103720
9606	Homo sapiens	9370	0	live	ADIPOQ	ACDC, ACRP30, ADIPQTL1, ADPN, APM-1, APM1, GBP28	adiponectin, C1Q and collagen domain containing	adiponectin|30 kDa adipocyte complement-related protein|adipocyte complement-related 30 kDa protein|adipose most abundant gene transcript 1 protein|adipose specific collagen-like factor|gelatin-binding protein 28	3q27.3	3	NC_000003.12	186842710	186858463	plus	4	605441
9606	Homo sapiens	5243	0	live	ABCB1	ABC20, CD243, CLCS, GP170, MDR1, P-GP, PGY1	ATP binding cassette subfamily B member 1	ATP-dependent translocase ABCB1|ATP-binding cassette, sub-family B (MDR/TAP), member 1|P glycoprotein|P-glycoprotein 1|colchicin sensitivity|doxorubicin resistance|multidrug resistance protein 1|phospholipid transporter ABCB1	7q21.12	7	NC_000007.14	87503017	87713323	minus	32	171050
9606	Homo sapiens	5887	0	live	RAD23B	HHR23B, HR23B, P58	RAD23 homolog B, nucleotide excision repair protein	UV excision repair protein RAD23 homolog B|RAD23, yeast homolog of, B|XP-C repair complementing complex 58 kDa|XP-C repair complementing protein|XP-C repair-complementing complex 58 kDa protein	9q31.2	9	NC_000009.12	107283279	107332194	plus	12	600062
9606	Homo sapiens	51742	0	live	ARID4B	BCAA, BRCAA1, RBBP1L1, RBP1L1, SAP180	AT-rich interaction domain 4B	AT-rich interactive domain-containing protein 4B|180 kDa Sin3-associated polypeptide|ARID domain-containing protein 4B|AT rich interactive domain 4B (RBP1-like)|Rb-binding protein homolog|SIN3A-associated protein 180|breast cancer-associated antigen 1|breast cancer-associated antigen BRCAA1|breast carcinoma-associated antigen|histone deacetylase complex subunit SAP180|retinoblastoma-binding prote…	1q42.3	1	NC_000001.11	235166895	235328224	minus	28	609696
9606	Homo sapiens	100874054	0	live	FALEC	FAL1, LINC00568, ncRNA-a1	focally amplified long non-coding RNA in epithelial cancer	focally amplified lncRNA on chromosome 1|long intergenic non-protein coding RNA 568|noncoding RNA-activating 1	1q21.2	1	NC_000001.11	150515757	150518032	plus	2	616092
9606	Homo sapiens	1548	0	live	CYP2A6	CPA6, CYP2A, CYP2A3, CYPIIA6, P450C2A, P450PB	cytochrome P450 family 2 subfamily A member 6	cytochrome P450 2A6|1,4-cineole 2-exo-monooxygenase|coumarin 7-hydroxylase|cytochrome P450 IIA3|cytochrome P450(I)|cytochrome P450, family 2, subfamily A, polypeptide 6|cytochrome P450, subfamily IIA (phenobarbital-inducible), polypeptide 6|flavoprotein-linked monooxygenase|xenobiotic monooxygenase	19q13.2	19	NC_000019.10	40843541	40850447	minus	9	122720
9606	Homo sapiens	4790	0	live	NFKB1	CVID12, EBP-1, KBF1, NF-kB, NF-kB1, NF-kappa-B1, NF-kappaB, NFKB-p105, NFKB-p50, NFkappaB, p105, p50	nuclear factor kappa B subunit 1	nuclear factor NF-kappa-B p105 subunit|DNA-binding factor KBF1|NF-kappabeta|nuclear factor NF-kappa-B p50 subunit|nuclear factor kappa-B DNA binding subunit|nuclear factor of kappa light polypeptide gene enhancer in B-cells 1	4q24	4	NC_000004.12	102501266	102617302	plus	27	164011
9606	Homo sapiens	10286	0	live	BCAS2	DAM1, SPF27, Snt309	BCAS2 pre-mRNA processing factor	pre-mRNA-splicing factor SPF27|DNA amplified in mammary carcinoma 1 protein|breast carcinoma amplified sequence 2|spliceosome associated protein, amplified in breast cancer|spliceosome-associated protein SPF 27	1p13.2	1	NC_000001.11	114567557	114581615	minus	7	605783
9606	Homo sapiens	203413	0	live	CT83	CXorf61, KK-LC-1, KKLC1	cancer/testis antigen 83	kita-kyushu lung cancer antigen 1	Xq23	X	NC_000023.11	116461686	116462976	minus	2	300625
9606	Homo sapiens	627	0	live	BDNF	ANON2, BULN2	brain derived neurotrophic factor	brain-derived neurotrophic factor|abrineurin|neurotrophin	11p14.1	11	NC_000011.10	27654893	27722030	minus	12	113505
9606	Homo sapiens	101805492	0	live	CASC9	ESCCAL-1, ESSCAL1, LINC00981, linc-JPH1	cancer susceptibility 9	ESCC-associated lncRNA|cancer susceptibility 9 (non-protein coding)|cancer susceptibility candidate 9 (non-protein coding)|esophageal squamous cell carcinoma associated lncRNA-1|esophageal squamous cell carcinoma sssociated lncRNA-1|long intergenic non-protein coding RNA 981	8q21.13	8	NC_000008.11	75223117	75278889	minus	4
9606	Homo sapiens	6774	0	live	STAT3	ADMIO, ADMIO1, APRF, HIES	signal transducer and activator of transcription 3	signal transducer and activator of transcription 3|DNA-binding protein APRF|acute-phase response factor	17q21.2	17	NC_000017.11	42313324	42388502	minus	24	102582
9606	Homo sapiens	7037	0	live	TFRC	CD71, IMD46, T9, TFR, TFR1, TR, TRFR, p90	transferrin receptor	transferrin receptor protein 1	3q29	3	NC_000003.12	196018694	196082123	minus	24	190010
9606	Homo sapiens	6867	0	live	TACC1	Ga55	transforming acidic coiled-coil containing protein 1	transforming acidic coiled-coil-containing protein 1|gastric cancer antigen Ga55|taxin-1	8p11.22	8	NC_000008.11	38728205	38853028	plus	23	605301
9606	Homo sapiens	8074	0	live	FGF23	ADHR, FGFN, HFTC2, HPDR2, HYPF, PHPTC	fibroblast growth factor 23	fibroblast growth factor 23|phosphatonin|tumor-derived hypophosphatemia inducing factor	12p13.32	12	NC_000012.12	4368227	4379712	minus	3	605380
9606	Homo sapiens	7421	0	live	VDR	NR1I1, PPP1R163	vitamin D receptor	vitamin D3 receptor|1,25-dihydroxyvitamin D3 receptor|nuclear receptor subfamily 1 group I member 1|protein phosphatase 1, regulatory subunit 163|vitamin D (1,25- dihydroxyvitamin D3) receptor|vitamin D nuclear receptor variant 1	12q13.11	12	NC_000012.12	47841537	47905022	minus	12	601769
9606	Homo sapiens	5195	0	live	PEX14	NAPP2, PBD13A, Pex14p, dJ734G22.2	peroxisomal biogenesis factor 14	peroxisomal membrane protein PEX14|NF-E2 associated polypeptide 2|PTS1 receptor docking protein|peroxin-14|peroxisomal membrane anchor protein PEX14|peroxisomal membrane anchor protein Pex14p	1p36.22	1	NC_000001.11	10474946	10630758	plus	14	601791
9606	Homo sapiens	7080	0	live	NKX2-1	BCH, BHC, NK-2, NKX2.1, NKX2A, NMTC1, T/EBP, TEBP, TITF1, TTF-1, TTF1	NK2 homeobox 1	homeobox protein Nkx-2.1|NK-2 homolog A|homeobox protein NK-2 homolog A|thyroid nuclear factor 1|thyroid transcription factor 1|thyroid-specific enhancer-binding protein	14q13.3	14	NC_000014.9	36516397	36520232	minus	3	600635
9606	Homo sapiens	5743	0	live	PTGS2	COX-2, COX2, GRIPGHS, PGG/HS, PGHS-2, PHS-2, hCox-2	prostaglandin-endoperoxide synthase 2	prostaglandin G/H synthase 2|PGH synthase 2|PHS II|cyclooxygenase 2|cyclooxygenase 2b|prostaglandin H2 synthase 2|prostaglandin-endoperoxide synthase 2 (prostaglandin G/H synthase and cyclooxygenase)	1q31.1	1	NC_000001.11	186671791	186680423	minus	10	600262
9606	Homo sapiens	22794	0	live	CASC3	BTZ, MLN51	CASC3 exon junction complex subunit	protein CASC3|MLN 51|barentsz|cancer susceptibility 3|cancer susceptibility candidate 3|cancer susceptibility candidate gene 3 protein|metastatic lymph node 51|metastatic lymph node gene 51 protein|protein barentsz	17q21.1	17	NC_000017.11	40140506	40172172	plus	14	606504
9606	Homo sapiens	83259	0	live	PCDH11Y	PCDH-PC, PCDH22, PCDHX, PCDHY	protocadherin 11 Y-linked	protocadherin-11 Y-linked|protocadherin 22|protocadherin on the Y chromosome|protocadherin prostate cancer|protocadherin-PC	Yp11.2	Y	NC_000024.10	5000044	5742228	plus	12	400022
9606	Homo sapiens	103	0	live	ADAR	ADAR1, AGS6, DRADA, DSH, DSRAD, G1P1, IFI-4, IFI4, K88DSRBP, P136	adenosine deaminase RNA specific	double-stranded RNA-specific adenosine deaminase|136 kDa double-stranded RNA-binding protein|adenosine deaminase acting on RNA 1-A|dsRNA adenosine deaminase|dsRNA adeonosine deaminase|interferon-induced protein 4|interferon-inducible protein 4	1q21.3	1	NC_000001.11	154582057	154631560	minus	21	146920
9606	Homo sapiens	4804	0	live	NGFR	CD271, Gp80-LNGFR, TNFRSF16, p75(NTR), p75NTR	nerve growth factor receptor	tumor necrosis factor receptor superfamily member 16|NGF receptor|TNFR superfamily, member 16|low affinity neurotrophin receptor p75NTR|low-affinity nerve growth factor receptor|p75 ICD	17q21.33	17	NC_000017.11	49495293	49515008	plus	6	162010
9606	Homo sapiens	2956	0	live	MSH6	GTBP, GTMBP, HNPCC5, HSAP, p160	mutS homolog 6	DNA mismatch repair protein Msh6|G/T mismatch-binding protein|mutS protein homolog 6|mutS-alpha 160 kDa subunit|sperm-associated protein	2p16.3	2	NC_000002.12	47783082	47806954	plus	12	600678
9606	Homo sapiens	4846	0	live	NOS3	ECNOS, eNOS	nitric oxide synthase 3	nitric oxide synthase, endothelial|EC-NOS|NOS type III|NOSIII|cNOS|constitutive NOS|endothelial NOS|nitric oxide synthase 3 (endothelial cell)|nitric oxide synthase 3 transcript variant eNOS-delta20|nitric oxide synthase 3 transcript variant eNOS-delta20-21|nitric oxide synthase 3 transcript variant eNOS-delta21	7q36.1	7	NC_000007.14	150991017	151014588	plus	28	163729
9606	Homo sapiens	27136	0	live	MORC1	CT33, MORC, ZCW6	MORC family CW-type zinc finger 1	MORC family CW-type zinc finger protein 1|cancer/testis antigen 33|microrchidia, mouse, homolog of	3q13.13	3	NC_000003.12	108958248	109118134	minus	32	603205
9606	Homo sapiens	94234	0	live	FOXQ1	HFH1	forkhead box Q1	forkhead box protein Q1|HFH-1|HNF-3/forkhead-like protein 1|hepatocyte nuclear factor 3 forkhead homolog 1|winged helix/forkhead transcription factor	6p25.3	6	NC_000006.12	1312098	1314758	plus	1	612788
9606	Homo sapiens	7099	0	live	TLR4	ARMD10, CD284, TLR-4, TOLL	toll like receptor 4	toll-like receptor 4|hToll|homolog of Drosophila toll|toll like receptor 4 protein	9q33.1	9	NC_000009.12	117704403	117724735	plus	4	603030
9606	Homo sapiens	100505495	0	live	PCAT19	LINC01190	prostate cancer associated transcript 19	long intergenic non-protein coding RNA 1190|prostate cancer associated transcript 19 (non-protein coding)	19q13.2	19	NC_000019.10	41454169	41500649	minus	4	618192
9606	Homo sapiens	1244	0	live	ABCC2	ABC30, CMOAT, DJS, MRP2, cMRP	ATP binding cassette subfamily C member 2	canalicular multispecific organic anion transporter 1|ATP-binding cassette, sub-family C (CFTR/MRP), member 2|canalicular multidrug resistance protein|multidrug resistance-associated protein 2	10q24.2	10	NC_000010.11	99782602	99853741	plus	34	601107
9606	Homo sapiens	1499	0	live	CTNNB1	CTNNB, EVR7, MRD19, NEDSDV, armadillo	catenin beta 1	catenin beta-1|catenin (cadherin-associated protein), beta 1, 88kDa	3p22.1	3	NC_000003.12	41199422	41240445	plus	19	116806
9606	Homo sapiens	5728	0	live	PTEN	10q23del, BZS, CWS1, DEC, GLM2, MHAM, MMAC11, PTENbeta, TEP1, PTEN	phosphatase and tensin homolog	phosphatidylinositol 3,4,5-trisphosphate 3-phosphatase and dual-specificity protein phosphatase PTEN|MMAC1 phosphatase and tensin homolog deleted on chromosome 10|mitochondrial PTENalpha|mitochondrial phosphatase and tensin protein alpha|mutated in multiple advanced cancers 1|phosphatase and tensin-like protein|phosphatidylinositol-3,4,5-trisphosphate 3-phosphatase and dual-specificity protein ph…	10q23.31	10	NC_000010.11	87863625	87971930	plus	10	601728
9606	Homo sapiens	80129	0	live	CCDC170	C6orf97, bA282P11.1	coiled-coil domain containing 170	coiled-coil domain-containing protein 170	6q25.1	6	NC_000006.12	151494017	151621193	plus	12
9606	Homo sapiens	1312	0	live	COMT	HEL-S-98n	catechol-O-methyltransferase	catechol O-methyltransferase|catechol-O-methyltransferase isoform|epididymis secretory sperm binding protein Li 98n|testicular tissue protein Li 42	22q11.21	22	NC_000022.11	19941772	19969975	plus	8	116790
9606	Homo sapiens	84218	0	live	TBC1D3F	TBC1D3, TBC1D3G	TBC1 domain family member 3F	TBC1 domain family member 3F|TBC1 domain family member 3|TBC1 domain family member 3G|prostate cancer gene 17 protein|protein TRE17-alpha	17q12	17	NC_000017.11	36428612	36439521	minus	14	610809
9606	Homo sapiens	2167	0	live	FABP4	A-FABP, AFABP, ALBP, HEL-S-104, aP2	fatty acid binding protein 4	fatty acid-binding protein, adipocyte|adipocyte fatty acid binding protein|adipocyte lipid-binding protein|adipocyte-type fatty acid-binding protein|epididymis secretory protein Li 104|fatty acid binding protein 4, adipocyte	8q21.13	8	NC_000008.11	81478419	81483233	minus	4	600434
9606	Homo sapiens	26512	0	live	INTS6	DBI-1, DDX26, DDX26A, DICE1, HDB, INT6, Notchl2	integrator complex subunit 6	integrator complex subunit 6|DEAD box protein|DEAD/H (Asp-Glu-Ala-Asp/His) box polypeptide 26|RNA helicase HDB|protein deleted in cancer 1	13q14.3	13	NC_000013.11	51353171	51453333	minus	22	604331
9606	Homo sapiens	3576	0	live	CXCL8	GCP-1, GCP1, IL8, LECT, LUCT, LYNAP, MDNCF, MONAP, NAF, NAP-1, NAP1	C-X-C motif chemokine ligand 8	interleukin-8|T-cell chemotactic factor|alveolar macrophage chemotactic factor I|beta endothelial cell-derived neutrophil activating peptide|beta-thromboglobulin-like protein|chemokine (C-X-C motif) ligand 8|emoctakin|granulocyte chemotactic protein 1|interleukin 8|lung giant cell carcinoma-derived chemotactic protein|lymphocyte derived neutrophil activating peptide|monocyte-derived neutrophil ch…	4q13.3	4	NC_000004.12	73740569	73743716	plus	4	146930
9606	Homo sapiens	401237	0	live	CASC15	CANT, LINC00340, lnc-SOX4-1	cancer susceptibility 15	cancer susceptibility 15 (non-protein coding)|cancer susceptibility candidate 15 (non-protein coding)|long intergenic non-protein coding RNA 340	6p22.3	6	NC_000006.12	21666413	22195820	plus	12	616610
9606	Homo sapiens	5468	0	live	PPARG	CIMT1, GLM1, NR1C31, PPARG2, PPARgamma, PPARG	peroxisome proliferator activated receptor gamma	peroxisome proliferator-activated receptor gamma|PPAR-gamma|nuclear receptor subfamily 1 group C member 3|peroxisome proliferator-activated nuclear receptor gamma variant 1	3p25.2	3	NC_000003.12	12287485	12434344	plus	14	601487
9606	Homo sapiens	3371	0	live	TNC	150-225, DFNA56, GMEM, GP, HXB, JI, TN, TN-C	tenascin C	tenascin|GP 150-225|cytotactin|deafness, autosomal dominant 56|glioma-associated-extracellular matrix antigen|hexabrachion (tenascin)|myotendinous antigen|neuronectin|tenascin-C additional domain 1|tenascin-C isoform 14/AD1/16	9q33.1	9	NC_000009.12	115019575	115118244	minus	31	187380
9606	Homo sapiens	79791	0	live	FBXO31	FBX14, FBXO14, Fbx31, MRT45, pp2386	F-box protein 31	F-box only protein 31|SCF ubiquitin ligase specificity factor|putative breast cancer tumor-suppressor	16q24.2	16	NC_000016.10	87326987	87392121	minus	11	609102
9606	Homo sapiens	56992	0	live	KIF15	HKLP2, KLP2, KNSL7, NY-BR-62	kinesin family member 15	kinesin-like protein KIF15|kinesin-like 7|kinesin-like protein 2|kinesin-like protein 7|serologically defined breast cancer antigen NY-BR-62	3p21.31	3	NC_000003.12	44761740	44853274	plus	40	617569
9606	Homo sapiens	6532	0	live	SLC6A4	5-HTT, 5-HTTLPR, 5HTT, HTT, OCD1, SERT, SERT1, hSERT	solute carrier family 6 member 4	sodium-dependent serotonin transporter|5-hydroxytryptamine (serotonin) transporter|5HT transporter|Na+/Cl- dependent serotonin transporter|serotonin transporter 1|solute carrier family 6 (neurotransmitter transporter), member 4|solute carrier family 6 (neurotransmitter transporter, serotonin), member 4	17q11.2	17	NC_000017.11	30194319	30235697	minus	15	182138
9606	Homo sapiens	3659	0	live	IRF1	IRF-1, MAR	interferon regulatory factor 1	interferon regulatory factor 1|interferon regulatory factor 1 isoform +I9|interferon regulatory factor 1 isoform d78|interferon regulatory factor 1 isoform d9,10+|interferon regulatory factor 1 isoform delta4|interferon regulatory factor 1 isoform delta7	5q31.1	5	NC_000005.10	132481609	132490789	minus	10	147575
9606	Homo sapiens	182	0	live	JAG1	AGS, AGS1, AHD, AWS, CD339, DCHE, HJ1, JAGL1	jagged canonical Notch ligand 1	protein jagged-1	20p12.2	20	NC_000020.11	10637684	10673999	minus	26	601920
9606	Homo sapiens	6622	0	live	SNCA	NACP, PARK1, PARK4, PD1	synuclein alpha	alpha-synuclein|I+/--synuclein|non A-beta component of AD amyloid|synuclein alpha-140|synuclein, alpha (non A4 component of amyloid precursor)|truncated alpha synuclein	4q22.1	4	NC_000004.12	89724099	89838324	minus	13	163890
9606	Homo sapiens	4105	0	live	MAGEA6	CT1.6, MAGE-3b, MAGE3B, MAGE6	MAGE family member A6	melanoma-associated antigen 6|MAGE-6 antigen|MAGE3B antigen|cancer/testis antigen 1.6|cancer/testis antigen family 1, member 6|melanoma antigen family A, 6|melanoma antigen family A6	Xq28	X	NC_000023.11	152766136	152769729	minus	3	300176
9606	Homo sapiens	3106	0	live	HLA-B	AS, B-4901, HLAB	major histocompatibility complex, class I, B	; major histocompatibility complex, class I, B|HLA class I antigen HLA-B|HLA class I histocompatibility antigen, B alpha chain|MHC HLA-B cell surface glycoprotein|MHC HLA-B transmembrane glycoprotein|MHC class 1 antigen|MHC class I antigen HLA-B alpha chain|MHC class I antigen HLA-B heavy chain|MHC class I antigen SHCHA|MHC class I molecule|leukocyte antigen class I-B	6p21.33	6	NC_000006.12	31353875	31357179	minus	8	142830
9606	Homo sapiens	80155	0	live	NAA15	Ga19, MRD50, NARG1, NAT1P, NATH, TBDN, TBDN100	N-alpha-acetyltransferase 15, NatA auxiliary subunit	N-alpha-acetyltransferase 15, NatA auxiliary subunit|N-terminal acetyltransferase|NMDA receptor regulated 1|NMDA receptor-regulated protein 1|gastric cancer antigen Ga19|protein tubedown-1|transcriptional coactivator tubedown-100|tubedown-1	4q31.1	4	NC_000004.12	139301499	139391384	plus	20	608000
9606	Homo sapiens	1496	0	live	CTNNA2	CAP-R, CAPR, CDCBM9, CT114, CTNR	catenin alpha 2	catenin alpha-2|alpha-N-catenin|alpha-catenin-related protein|cadherin-associated protein, related|cancer/testis antigen 114|catenin (cadherin-associated protein), alpha 2	2p12	2	NC_000002.12	79505054	80648868	plus	29	114025
9606	Homo sapiens	2543	0	live	GAGE1	CT4.1, CT4.4, GAGE-1, GAGE-4, GAGE4	G antigen 1	G antigen 1|Cancer/testis antigen 4.4|G antigen 4|MZ2-F antigen|cancer/testis antigen 4.1|cancer/testis antigen family 4, member 1	Xp11.23	X	NC_000023.11	49598992	49608536	plus	7	300594
9606	Homo sapiens	246100	0	live	CTAG1A	CT6.1, ESO1, LAGE-2, LAGE2A, NY-ESO-1	cancer/testis antigen 1A	cancer/testis antigen 1|New York Esophageal Squamous Cell Carcinoma 1|autoimmunogenic cancer/testis antigen NY-ESO-1|cancer/testis antigen 1-A|cancer/testis antigen 6.1|l antigen family member 2	Xq28	X	NC_000023.11	154585133	154586816	plus	3	300657
9606	Homo sapiens	55616	0	live	ASAP3	ACAP4, CENTB6, DDEFL1, UPLC1	ArfGAP with SH3 domain, ankyrin repeat and PH domain 3	arf-GAP with SH3 domain, ANK repeat and PH domain-containing protein 3|ARF6 GTPase-activating protein|ArfGAP with SH3 domain, ankyrin repeat and PH domain 3 1|centaurin, beta 6|development and differentiation enhancing factor-like 1|protein up-regulated in liver cancer 1|up-regulated in liver cancer 1 (UPLC1)	1p36.12	1	NC_000001.11	23428563	23484631	minus	26	616594
9606	Homo sapiens	55510	0	live	DDX43	CT13, HAGE	DEAD-box helicase 43	probable ATP-dependent RNA helicase DDX43|DEAD (Asp-Glu-Ala-Asp) box polypeptide 43|DEAD box protein HAGE|DEAD-box protein 43|cancer/testis antigen 13|helical antigen	6q13	6	NC_000006.12	73394828	73417566	plus	17	606286
9606	Homo sapiens	407021	0	live	MIR29A	MIRN29, MIRN29A, hsa-mir-29, hsa-mir-29a, miRNA29A, mir-29a	microRNA 29a	microRNA 29	7q32.3	7	NC_000007.14	130876747	130876810	minus	1	610782
9606	Homo sapiens	123688	0	live	HYKK	AGPHD1	hydroxylysine kinase	hydroxylysine kinase|5-hydroxy-L-lysine kinase|5-hydroxylysine kinase|aminoglycoside phosphotransferase domain-containing protein 1	15q25.1	15	NC_000015.10	78507564	78537373	plus	6	614681
9606	Homo sapiens	26256	0	live	CABYR	CABYRac, CABYRc/d, CABYRe, CBP86, CT88, FSP-2, FSP2, CABYR	calcium binding tyrosine phosphorylation regulated	calcium-binding tyrosine phosphorylation-regulated protein|calcium binding tyrosine-(Y)-phosphorylation regulated (fibrousheathin 2)|calcium-binding protein 86|cancer/testis antigen 88|fibrousheathin II|fibrousheathin-2|testis tissue sperm-binding protein Li 84P|testis-specific calcium-binding protein CBP86	18q11.2	18	NC_000018.10	24138956	24161600	plus	9	612135
9606	Homo sapiens	9564	0	live	BCAR1	CAS, CAS1, CASS1, CRKAS, P130Cas	BCAR1 scaffold protein, Cas family member	breast cancer anti-estrogen resistance protein 1|BCAR1, Cas family scaffold protein|BCAR1, Cas family scaffolding protein|Cas scaffolding protein family member 1|Crk-associated substrate p130Cas	16q23.1	16	NC_000016.10	75228181	75268007	minus	14	602941
9606	Homo sapiens	11259	0	live	FILIP1L	DOC-1, DOC1, GIP130, GIP90	filamin A interacting protein 1 like	filamin A-interacting protein 1-like|130 kDa GPBP-interacting protein|90 kDa GPBP-interacting protein|protein down-regulated in ovarian cancer 1	3q12.1	3	NC_000003.12	99833144	100114513	minus	10	612993
9606	Homo sapiens	170626	0	live	XAGE3	CT12.3a, CT12.3b, GAGED4, PLAC6, XAGE-3, pp9012	X antigen family member 3	X antigen family member 3|CT12.3|G antigen, family D, 4|cancer/testis antigen 12.3|cancer/testis antigen family 12, member 3a|cancer/testis antigen family 12, member 3b|g antigen family D member 4|placenta-specific 6|placenta-specific gene 6 protein|protein XAGE-3	Xp11.22	X	NC_000023.11	52862528	52868140	minus	7	300740
9606	Homo sapiens	100506428	0	live	CBR3-AS1	PlncRNA-1, PlncRNA1	CBR3 antisense RNA 1	CBR3 antisense RNA 1 (non-protein coding)|prostate cancer-up-regulated long noncoding RNA 1	21q22.12	21	NC_000021.9	36131767	36156308	minus	5
9606	Homo sapiens	261729	0	live	STEAP2	IPCA1, PCANAP1, PUMPCn, STAMP1, STMP	STEAP2 metalloreductase	metalloreductase STEAP2|STEAP family member 2, metalloreductase|SixTransMembrane Protein of Prostate 1|prostate cancer-associated protein 1|protein up-regulated in metastatic prostate cancer|protein upregulated in metastatic prostate cancer|six transmembrane epithelial antigen of the prostate 2|six-transmembrane epithelial antigen of prostate 2	7q21.13	7	NC_000007.14	90211740	90243408	plus	9	605094
9606	Homo sapiens	7515	0	live	XRCC1	RCC, SCAR26	X-ray repair cross complementing 1	DNA repair protein XRCC1|X-ray repair complementing defective repair in Chinese hamster cells 1|X-ray repair cross-complementing protein 1	19q13.31	19	NC_000019.10	43543311	43575527	minus	17	194360
9606	Homo sapiens	3624	0	live	INHBA	EDF, FRP	inhibin subunit beta A	inhibin beta A chain|FSH-releasing protein|Inhibin, beta-1|activin beta-A chain|erythroid differentiation factor|erythroid differentiation protein|follicle-stimulating hormone-releasing protein|inhibin beta A subunit|inhibin, beta A (activin A, activin AB alpha polypeptide)	7p14.1	7	NC_000007.14	41685101	41710532	minus	7	147290
9606	Homo sapiens	2475	0	live	MTOR	FRAP, FRAP1, FRAP2, RAFT1, RAPT1, SKS	mechanistic target of rapamycin kinase	serine/threonine-protein kinase mTOR|FK506 binding protein 12-rapamycin associated protein 2|FK506-binding protein 12-rapamycin complex-associated protein 1|FKBP-rapamycin associated protein|FKBP12-rapamycin complex-associated protein 1|mammalian target of rapamycin|mechanistic target of rapamycin (serine/threonine kinase)|rapamycin and FKBP12 target 1|rapamycin associated protein FRAP2|rapamycin…	1p36.22	1	NC_000001.11	11106535	11273497	minus	60	601231
9606	Homo sapiens	414899	0	live	BLID	BRCC2	BH3-like motif containing, cell death inducer	BH3-like motif-containing cell death inducer|breast cancer cell 2|breast cancer cell protein 2	11q24.1	11	NC_000011.10	122115340	122116215	minus	1	608853
9606	Homo sapiens	580	0	live	BARD1		BRCA1 associated RING domain 1	BRCA1-associated RING domain protein 1|BRCA1-associated RING domain gene 1|RING-type E3 ubiquitin transferase BARD1	2q35	2	NC_000002.12	214725645	214809683	minus	13	601593
9606	Homo sapiens	596	0	live	BCL2	Bcl-2, PPP1R50	BCL2 apoptosis regulator	apoptosis regulator Bcl-2|B-cell CLL/lymphoma 2|protein phosphatase 1, regulatory subunit 50	18q21.33	18	NC_000018.10	63123346	63320280	minus	6	151430
9606	Homo sapiens	9566	0	live	HPCX		hereditary prostate cancer, X-linked	Prostate cancer, hereditary, X-linked	Xq27-q28	X						300147
9606	Homo sapiens	4137	0	live	MAPT	DDPAC, FTDP-17L, MSTD, MTBT1, MTBT2, PPND, PPP1R103, TAU, MAPT	microtubule associated protein tau	microtubule-associated protein tau|G protein beta1/gamma2 subunit-interacting factor 1|PHF-tau|neurofibrillary tangle protein|paired helical filament-tau|protein phosphatase 1, regulatory subunit 103	17q21.31	17	NC_000017.11	45894382	46028334	plus	15	157140
9606	Homo sapiens	578	0	live	BAK1	BAK, BAK-LIKE, BCL2L7, CDN1	BCL2 antagonist/killer 1	bcl-2 homologous antagonist/killer|BCL2-like 7 protein|apoptosis regulator BAK|bcl-2-like protein 7|bcl2-L-7|pro-apoptotic protein BAK	6p21.31	6	NC_000006.12	33572552	33580296	minus	7	600516
9606	Homo sapiens	101669767	0	live	SCHLAP1	LINC00913, PCAT11, PCAT114	SWI/SNF complex antagonist associated with prostate cancer 1	SWI/SNF complex antagonist associated with prostate cancer 1 (non-protein coding)|Second Chromosome Locus Associated with Prostate 1|long intergenic non-protein coding RNA 913|prostate cancer associated transcript 11	2q31.3	2	NC_000002.12	180692104	180916939	plus	7	615568
9606	Homo sapiens	7494	0	live	XBP1	TREB-5, TREB5, XBP-1, XBP2	X-box binding protein 1	X-box-binding protein 1|tax-responsive element-binding protein 5	22q12	22	NC_000022.11	28794560	28800572	minus	6	194355
9606	Homo sapiens	4111	0	live	MAGEA12	CT1.12, MAGE12	MAGE family member A12	melanoma-associated antigen 12|MAGE12F antigen|cancer/testis antigen 1.12|cancer/testis antigen family 1, member 12|melanoma antigen family A, 12|melanoma antigen family A12	Xq28	X	NC_000023.11	152733757	152737669	plus	4	300177
9606	Homo sapiens	3952	0	live	LEP	LEPD, OB, OBS	leptin	leptin|leptin (murine obesity homolog)|leptin (obesity homolog, mouse)|obese protein|obese, mouse, homolog of|obesity factor	7q32.1	7	NC_000007.14	128241201	128257629	plus	3	164160
9606	Homo sapiens	2944	0	live	GSTM1	GST1-1, GSTM1a-1a, GSTM1b-1b, GTH4, GTM1, H-B, MU, MU-1, GSTM1	glutathione S-transferase mu 1	glutathione S-transferase Mu 1|GST HB subunit 4|GST class-mu 1|HB subunit 4|S-(hydroxyalkyl)glutathione lyase|glutathione S-alkyltransferase|glutathione S-aralkyltransferase|glutathione S-aryltransferase|glutathione S-transferase M1	1p13.3	1	NC_000001.11	109687817	109693745	plus	8	138350
9606	Homo sapiens	1801	0	live	DPH1	DEDSSH, DPH2L, DPH2L1, OVCA1	diphthamide biosynthesis 1	2-(3-amino-3-carboxypropyl)histidine synthase subunit 1|DPH-like 1|DPH1 homolog|DPH2-like 1|S-adenosyl-L-methionine:L-histidine 3-amino-3-carboxypropyltransferase 1|candidate tumor suppressor in ovarian cancer 1|diphthamide biosynthesis protein 1|diphthamide biosynthesis protein 2 homolog-like 1|diphtheria toxin resistance protein 1|diptheria toxin resistance protein required for diphthamide bios…	17p13.3	17	NC_000017.11	2030112	2044967	plus	13	603527
9606	Homo sapiens	81848	0	live	SPRY4	HH17	sprouty RTK signaling antagonist 4	protein sprouty homolog 4|sprouty homolog 4	5q31.3	5	NC_000005.10	142310435	142325021	minus	5	607984
9606	Homo sapiens	7852	0	live	CXCR4	CD184, D2S201E, FB22, HM89, HSY3RR, LAP-3, LAP3, LCR1, LESTR, NPY3R, NPYR, NPYRL, NPYY3R, WHIM, WHIMS	C-X-C motif chemokine receptor 4	C-X-C chemokine receptor type 4|CD184 antigen|LPS-associated protein 3|SDF-1 receptor|chemokine (C-X-C motif) receptor 4|chemokine receptor|fusin|leukocyte-derived seven transmembrane domain receptor|lipopolysaccharide-associated protein 3|neuropeptide Y receptor Y3|neuropeptide Y3 receptor|seven transmembrane helix receptor|seven-transmembrane-segment receptor, spleen|stromal cell-derived factor…	2q22.1	2	NC_000002.12	136114349	136118149	minus	4	162643
9606	Homo sapiens	51270	0	live	TFDP3	CT30, DP4, HCA661	transcription factor Dp family member 3	transcription factor Dp family member 3|E2F-like protein|cancer/testis antigen 30|hepatocellular carcinoma-associated antigen 661	Xq26.2	X	NC_000023.11	133216662	133218354	minus	1	300772
9606	Homo sapiens	54097	0	live	FAM3B	2-21, C21orf11, C21orf76, ORF9, PANDER, PRED44	FAM3 metabolism regulating signaling molecule B	protein FAM3B|D21M16SJHU19e|cytokine-like protein 2-21|family with sequence similarity 3 member B|pancreatic derived factor	21q22.3	21	NC_000021.9	41304229	41357727	plus	11	608617
9606	Homo sapiens	3458	0	live	IFNG	IFG, IFI	interferon gamma	interferon gamma|IFN-gamma|immune interferon	12q15	12	NC_000012.12	68154768	68159740	minus	4	147570
9606	Homo sapiens	64852	0	live	TUT1	PAPD2, RBM21, STARPAP, TENT1, TUTase, URLC6	terminal uridylyl transferase 1, U6 snRNA-specific	speckle targeted PIP5K1A-regulated poly(A) polymerase|PAP-associated domain-containing 2|RNA uridylyltransferase|RNA-binding motif protein 21|RNA-binding protein 21|TUTase 6|U6 snRNA-specific terminal uridylyltransferase 1|U6-TUTase|nuclear speckle targeted phosphatidylinositol 4-phosphate 5-kinase type I-alpha regulated-poly(A) polymerase|nuclear speckle-targeted PIPK1A-regulated-poly(A) polymer…	11q12.3	11	NC_000011.10	62575052	62591523	minus	9	610641
9606	Homo sapiens	9125	0	live	CNOT9	CAF40, CT129, RCD-1, RCD1, RQCD1	CCR4-NOT transcription complex subunit 9	CCR4-NOT transcription complex subunit 9|RCD1 required for cell differentiation1 homolog|cancer/testis antigen 129|cell differentiation protein RCD1 homolog|cell differentiation protein RQCD1 homolog|protein involved in sexual development	2q35	2	NC_000002.12	218568578	218597080	plus	12	612054
9606	Homo sapiens	27328	0	live	PCDH11X	PCDH-X, PCDH-Y, PCDH11, PCDH11Y, PCDH22, PCDHX, PPP1R119	protocadherin 11 X-linked	protocadherin-11 X-linked|Protocadherin on the Y chromosome|Protocadherin prostate cancer|Protocadherin-11 Y-linked|Protocadherin-22|Protocadherin-PC|protein phosphatase 1, regulatory subunit 119|protocadherin 11X|protocadherin on the X chromosome|protocadherin-S	Xq21.31	X	NC_000023.11	91779310	92623230	plus	15	300246
9606	Homo sapiens	10811	0	live	NOXA1	NY-CO-31, SDCCAG31, p51NOX	NADPH oxidase activator 1	NADPH oxidase activator 1|NCF2-like protein|Nox activator 1|antigen NY-CO-31|inhibitory NADPH oxidase activator 1|p51-nox|p67phox-like factor|serologically defined colon cancer antigen 31	9q34.3	9	NC_000009.12	137423372	137434406	plus	15	611255
9606	Homo sapiens	3655	0	live	ITGA6	CD49fB, VLA-6, ITGA6	integrin subunit alpha 6	integrin alpha-6|CD49 antigen-like family member F|integrin alpha6B|integrin, alpha 6	2q31.1	2	NC_000002.12	172427336	172506459	plus	28	147556
9606	Homo sapiens	55729	0	live	ATF7IP	AM, ATF-IP, MCAF, MCAF1, p621	activating transcription factor 7 interacting protein	activating transcription factor 7-interacting protein 1|ATF-interacting protein|ATF7-interacting protein|ATFa-associated modulator|MBD1-containing chromatin-associated factor 1	12p13.1	12	NC_000012.12	14365632	14502935	plus	22	613644
9606	Homo sapiens	54843	0	live	SYTL2	CHR11SYT, EXO4, PPP1R151, SGA72M, SLP2, SLP2A	synaptotagmin like 2	synaptotagmin-like protein 2|breast cancer-associated antigen SGA-72M|chromosome 11 synaptotagmin|exophilin-4|protein phosphatase 1, regulatory subunit 151	11q14.1	11	NC_000011.10	85694221	85811182	minus	22	612880
9606	Homo sapiens	2200	0	live	FBN1	ACMICD, ECTOL1, FBN, GPHYSD2, MASS, MFLS, MFS1, OCTD, SGS, SSKS, WMS, WMS2	fibrillin 1	fibrillin-1|asprosin|epididymis secretory sperm binding protein|fibrillin 15|fibrillin-1 preproprotein	15q21.1	15	NC_000015.10	48408313	48645709	minus	66	134797
9606	Homo sapiens	7361	0	live	UGT1A	GNT1, UGT, UGT1@, UGT1A	UDP glucuronosyltransferase family 1 member A complex locus	UDP glucuronosyltransferase 1 family, polypeptide A cluster|UDP glucuronosyltransferase 1 family, polypeptide A complex locus|UDP glycosyltransferase 1 family, polypeptide A cluster	2q37.1	2	NC_000002.12	233585439	233773299	plus	0
9606	Homo sapiens	100505994	0	live	LUCAT1	SCAL1, SCAT5	lung cancer associated transcript 1	S-phase cancer-associated transcript 7|lung cancer associated transcript 1 (non-protein coding)|smoke and cancer associated lncRNA 1	5q14.3	5	NC_000005.10	91302986	91314402	minus	6	618190
9606	Homo sapiens	8038	0	live	ADAM12	ADAM12-OT1, CAR10, MCMP, MCMPMltna, MLTN, MLTNA	ADAM metallopeptidase domain 12	disintegrin and metalloproteinase domain-containing protein 12|meltrin-alpha|metalloprotease-disintegrin 12 transmembrane	10q26.2	10	NC_000010.11	126012391	126388477	minus	27	602714
9606	Homo sapiens	4193	0	live	MDM2	ACTFS, HDMX, LSKB, hdm2	MDM2 proto-oncogene	E3 ubiquitin-protein ligase Mdm2|MDM2 oncogene, E3 ubiquitin protein ligase|MDM2 proto-oncogene, E3 ubiquitin protein ligase|Mdm2, p53 E3 ubiquitin protein ligase homolog|Mdm2, transformed 3T3 cell double minute 2, p53 binding protein|double minute 2, human homolog of; p53-binding protein|oncoprotein Mdm2	12q15	12	NC_000012.12	68808149	68850686	plus	13	164785
9606	Homo sapiens	1612	0	live	DAPK1	DAPK, ROCO3	death associated protein kinase 1	death-associated protein kinase 1|DAP kinase 1	9q21.33	9	NC_000009.12	87497228	87708634	plus	31	600831
9606	Homo sapiens	23236	0	live	PLCB1	EIEE12, PI-PLC, PLC-154, PLC-I, PLC-beta-1, PLC154A, PLCB1B, PLCB1	phospholipase C beta 1	1-phosphatidylinositol 4,5-bisphosphate phosphodiesterase beta-1|1-phosphatidyl-D-myo-inositol-4,5-bisphosphate|inositoltrisphosphohydrolase|monophosphatidylinositol phosphodiesterase|phosphoinositidase C|phosphoinositide phospholipase C|phospholipase C, beta 1 (phosphoinositide-specific)|phospholipase C-I|triphosphoinositide phosphodiesterase	20p12.3	20	NC_000020.11	8132266	8884900	plus	33	607120
9606	Homo sapiens	3717	0	live	JAK2	JTK10, THCYT3	Janus kinase 2	tyrosine-protein kinase JAK2|JAK-2|Janus kinase 2 (a protein tyrosine kinase)	9p24.1	9	NC_000009.12	4985086	5129948	plus	26	147796
9606	Homo sapiens	101669762	0	live	BLACAT1	LINC00912, linc-UBC1, onco-lncRNA-30	bladder cancer associated transcript 1	bladder cancer associated transcript 1 (non-protein coding)|long intergenic non-protein coding RNA 912|long intergenic noncoding RNA up-regulated in bladder cancer	1q32.1	1	NC_000001.11	205434886	205456086	minus	2	615480
9606	Homo sapiens	4313	0	live	MMP2	CLG4, CLG4A, MMP-2, MMP-II, MONA, TBE-1	matrix metallopeptidase 2	72 kDa type IV collagenase|collagenase type IV-A|matrix metallopeptidase 2 (gelatinase A, 72kDa gelatinase, 72kDa type IV collagenase)|matrix metalloproteinase-2|matrix metalloproteinase-II|neutrophil gelatinase	16q12.2	16	NC_000016.10	55478830	55506691	plus	17	120360
9606	Homo sapiens	920	0	live	CD4	CD4mut	CD4 molecule	T-cell surface glycoprotein CD4|CD4 antigen (p55)|CD4 receptor|T-cell surface antigen T4/Leu-3	12p13.31	12	NC_000012.12	6789528	6820810	plus	10	186940
9606	Homo sapiens	51316	0	live	PLAC8	C15, DGIC, PNAS-144, onzin	placenta associated 8	placenta-specific gene 8 protein|down-regulated in gastrointestinal cancer protein|placenta specific 8	4q21.22	4	NC_000004.12	83090048	83114729	minus	6	607515
9606	Homo sapiens	26191	0	live	PTPN22	LYP, LYP1, LYP2, PEP.5, PTPN22.6, PTPN8, PTPN22	protein tyrosine phosphatase non-receptor type 22	tyrosine-protein phosphatase non-receptor type 22|PEST-domain phosphatase|hematopoietic cell protein-tyrosine phosphatase 70Z-PEP|lymphoid-specific protein tyrosine phosphatase|protein tyrosine phosphatase, non-receptor type 22 (lymphoid)|protein tyrosine phosphatase, non-receptor type 8	1p13.2	1	NC_000001.11	113813811	113871761	minus	24	600716
9606	Homo sapiens	4108	0	live	MAGEA9	CT1.9, MAGE9	MAGE family member A9	melanoma-associated antigen 9|MAGE-9 antigen|cancer/testis antigen 1.9|cancer/testis antigen family 1, member 9|melanoma antigen family A, 9|melanoma antigen family A9	Xq28	X	NC_000023.11	149781876	149787737	plus	5	300342
9606	Homo sapiens	378805	0	live	LINC-PINT	LincRNA-Pint, MKLN1-AS1, PINT	long intergenic non-protein coding RNA, p53 induced transcript	MKLN1 antisense RNA 1 (head to head)|p53 induced noncoding transcript	7q32.3	7	NC_000007.14	130877562	131109916	minus	17	618212
9606	Homo sapiens	4317	0	live	MMP8	CLG1, HNC, MMP-8, PMNL-CL	matrix metallopeptidase 8	neutrophil collagenase|PMN leukocyte collagenase|PMNL collagenase|collagenase 2|matrix metalloproteinase 8 (neutrophil collagenase)|matrix metalloproteinase-8	11q22.2	11	NC_000011.10	102711796	102724967	minus	12	120355
9606	Homo sapiens	1072	0	live	CFL1	CFL, HEL-S-15, cofilin	cofilin 1	cofilin-1|18 kDa phosphoprotein|cofilin 1 (non-muscle)|cofilin, non-muscle isoform|epididymis secretory protein Li 15|p18	11q13.1	11	NC_000011.10	65854673	65858180	minus	4	601442
9606	Homo sapiens	55257	0	live	MRGBP	C20orf20, Eaf7, MRG15BP, URCC4	MRG domain binding protein	MRG/MORF4L-binding protein|MRG-binding protein|MRG/MORF4L binding protein|up-regulated in colon cancer 4	20q13.33	20	NC_000020.11	62796473	62801729	plus	5	611157
9606	Homo sapiens	9066	0	live	SYT7	IPCA-7, IPCA7, PCANAP7, SYT-VII, SYTVII	synaptotagmin 7	synaptotagmin-7|prostate cancer-associated protein 7|synaptotagmin VII	11q12.2	11	NC_000011.10	61513714	61588404	minus	18	604146
9606	Homo sapiens	5594	0	live	MAPK1	ERK, ERK-2, ERK2, ERT1, MAPK2, P42MAPK, PRKM1, PRKM2, p38, p40, p41, p41mapk, p42-MAPK	mitogen-activated protein kinase 1	mitogen-activated protein kinase 1|MAP kinase 1|MAP kinase 2|MAP kinase isoform p42|MAPK 2|extracellular signal-regulated kinase 2|mitogen-activated protein kinase 2|protein tyrosine kinase ERK2	22q11.22	22	NC_000022.11	21759657	21867680	minus	9	176948
9606	Homo sapiens	9839	0	live	ZEB2	HSPC082, SIP-1, SIP1, SMADIP1, ZFHX1B	zinc finger E-box binding homeobox 2	zinc finger E-box-binding homeobox 2|SMAD interacting protein 1|Smad-interacting protein 1|zinc finger homeobox 1b	2q22.3	2	NC_000002.12	144384081	144520119	minus	11	605802
9606	Homo sapiens	84284	0	live	NTPCR	C1orf57, HCR-NTPase, THEP1	nucleoside-triphosphatase, cancer-related	cancer-related nucleoside-triphosphatase|human cancer-related NTPase|nucleoside triphosphate phosphohydrolase|nucleoside-triphosphatase C1orf57	1q42.2	1	NC_000001.11	232950611	232983882	plus	6
9606	Homo sapiens	64663	0	live	SPANXC	CT11.3, CTp11, SPANX-C, SPANX-E, SPANXE	SPANX family member C	sperm protein associated with the nucleus on the X chromosome C|Nuclear-associated protein SPAN-Xe|SPAN-Xc protein|Sperm protein associated with the nucleus on the X chromosome E|cancer-testis-associated protein CTp11|cancer/testis antigen 11.3|cancer/testis antigen family 11, member 3|cancer/testis-associated protein of 11 kD|nuclear-associated protein SPAN-Xc|sperm protein associated with the n…	Xq27.2	X	NC_000023.11	141241463	141242517	minus	2	300330
9606	Homo sapiens	466	0	live	ATF1	EWS-ATF1, FUS/ATF-1, TREB36	activating transcription factor 1	cyclic AMP-dependent transcription factor ATF-1|cAMP-dependent transcription factor ATF-1	12q13.12	12	NC_000012.12	50763682	50821162	plus	13	123803
9606	Homo sapiens	928	0	live	CD9	BTCC-1, DRAP-27, MIC3, MRP-1, TSPAN-29, TSPAN29	CD9 molecule	CD9 antigen|5H9 antigen|BA-2/p24 antigen|CD9 antigen (p24)|antigen CD9|cell growth-inhibiting gene 2 protein|leukocyte antigen MIC3|motility related protein-1|tetraspanin-29	12p13.31	12	NC_000012.12	6199946	6238266	plus	9	143030
9606	Homo sapiens	50514	0	live	DELEC1	CTS9, DEC1	deleted in esophageal cancer 1	candidate tumor suppressor 9|candidate tumor suppressor CTS9	9q33.1	9	NC_000009.12	115141818	115402644	plus	8	604767
9606	Homo sapiens	4957	0	live	ODF2	CT134/1, ODF2/2, ODF84, ODF2	outer dense fiber of sperm tails 2	outer dense fiber protein 2|cancer/testis antigen 134|cenexin 1|outer dense fiber of sperm tails, 84-kD|sperm tail structural protein|testis tissue sperm-binding protein Li 51e	9q34.11	9	NC_000009.12	128455155	128501292	plus	26	602015
9606	Homo sapiens	54940	0	live	OCIAD1	ASRIJ, OCIA, TPA018	OCIA domain containing 1	OCIA domain-containing protein 1|ovarian cancer immunoreactive antigen domain containing 1|ovarian cancer immunoreactive antigen domain containing 1A|ovarian carcinoma immunoreactive antigen	4p11	4	NC_000004.12	48830924	48861817	plus	10
9606	Homo sapiens	5054	0	live	SERPINE1	PAI, PAI-1, PAI1, PLANH1	serpin family E member 1	plasminogen activator inhibitor 1|endothelial plasminogen activator inhibitor|serine (or cysteine) proteinase inhibitor, clade E (nexin, plasminogen activator inhibitor type 1), member 1|serpin E1|serpin peptidase inhibitor, clade E (nexin, plasminogen activator inhibitor type 1), member 1	7q22.1	7	NC_000007.14	101127104	101139247	plus	9	173360
9606	Homo sapiens	29126	0	live	CD274	B7-H, B7H1, PD-L1, PDCD1L1, PDCD1LG1, PDL1, hPD-L1	CD274 molecule	programmed cell death 1 ligand 1|B7 homolog 1|CD274 antigen|PDCD1 ligand 1	9p24.1	9	NC_000009.12	5450503	5470567	plus	7	605402
9606	Homo sapiens	56154	0	live	TEX15	CT42, SPGF25	testis expressed 15, meiosis and synapsis associated	testis-expressed protein 15|cancer/testis antigen 42|testis-expressed sequence 15 protein	8p12	8	NC_000008.11	30831544	30913008	minus	12	605795
9606	Homo sapiens	7834	0	live	PCAP	HPC2, HPC8	predisposing for prostate cancer		1q42.2-q43	1						602759
9606	Homo sapiens	1234	0	live	CCR5	CC-CKR-5, CCCKR5, CCR-5, CD195, CKR-5, CKR5, CMKBR5, IDDM22	C-C motif chemokine receptor 5 (gene/pseudogene)	C-C chemokine receptor type 5|C-C motif chemokine receptor 5 A159A|HIV-1 fusion coreceptor|chemokine (C-C motif) receptor 5|chemokine receptor CCR5|chemokine recptor CCR5 Delta32|chemr13	3p21.31	3	NC_000003.12	46370142	46376206	plus	3	601373
9606	Homo sapiens	286205	0	live	SCAI	C9orf126, NET40	suppressor of cancer cell invasion	protein SCAI|suppressor of cancer cell invasion protein	9q33.3	9	NC_000009.12	124942608	125143528	minus	21
9606	Homo sapiens	54742	0	live	LY6K	CT97, HSJ001348, URLC10, ly-6K	lymphocyte antigen 6 family member K	lymphocyte antigen 6K|cancer/testis antigen 97|lymphocyte antigen 6 complex, locus K|up-regulated in lung cancer 10	8q24.3	8	NC_000008.11	142700081	142705127	plus	3	615093
9606	Homo sapiens	1910	0	live	EDNRB	ABCDS, ET-B, ET-BR, ETB, ETB1, ETBR, ETRB, HSCR, HSCR2, WS4A	endothelin receptor type B	endothelin receptor type B|Hirschsprung disease 2|endothelin receptor non-selective type|endothelin receptor subtype B1	13q22.3	13	NC_000013.11	77895481	77975527	minus	9	131244
9606	Homo sapiens	5444	0	live	PON1	ESA, MVCD5, PON	paraoxonase 1	serum paraoxonase/arylesterase 1|A-esterase 1|K-45|PON 1|aromatic esterase 1|arylesterase 1|arylesterase B-type|esterase A|paraoxonase B-type|serum aryldiakylphosphatase|serum aryldialkylphosphatase 1	7q21.3	7	NC_000007.14	95297676	95324532	minus	9	168820
9606	Homo sapiens	6347	0	live	CCL2	GDCF-2, HC11, HSMCR30, MCAF, MCP-1, MCP1, SCYA2, SMC-CF	C-C motif chemokine ligand 2	C-C motif chemokine 2|chemokine (C-C motif) ligand 2|monocyte chemoattractant protein-1|monocyte chemotactic and activating factor|monocyte chemotactic protein 1|monocyte secretory protein JE|small inducible cytokine A2 (monocyte chemotactic protein 1, homologous to mouse Sig-je)|small inducible cytokine subfamily A (Cys-Cys), member 2|small-inducible cytokine A2	17q12	17	NC_000017.11	34255285	34257203	plus	3	158105
9606	Homo sapiens	4956	0	live	ODF1	CT133, HSPB10, ODF, ODF2, ODF27, ODFP, ODFPG, ODFPGA, ODFPGB, RT7, SODF	outer dense fiber of sperm tails 1	outer dense fiber protein 1|cancer/testis antigen 133|heat shock protein beta-10|outer dense fiber of sperm tails, 27-kD	8q22.3	8	NC_000008.11	102551589	102561018	plus	2	182878
9606	Homo sapiens	2952	0	live	GSTT1		glutathione S-transferase theta 1	glutathione S-transferase theta-1|GST class-theta-1|glutathione transferase T1-1	22q11.23	22						600436
9606	Homo sapiens	10566	0	live	AKAP3	AKAP 110, AKAP110, CT82, FSP95, HEL159, PRKA3, SOB1	A-kinase anchoring protein 3	A-kinase anchor protein 3|A kinase (PRKA) anchor protein 3|A-kinase anchor protein, 110kDa|Fibrous Sheath Protein of 95 kDa|cancer/testis antigen 82|epididymis luminal protein 159|epididymis secretory sperm binding protein|fibrousheathin I|fibrousheathin-1|protein kinase A binding protein AKAP 110|protein kinase A-anchoring protein 3|sperm oocyte-binding protein 1	12p13.32	12	NC_000012.12	4615508	4649051	minus	6	604689
9606	Homo sapiens	5144	0	live	PDE4D	ACRDYS2, DPDE3, HSPDE4D, PDE43N2, STRK1, PDE4D	phosphodiesterase 4D	cAMP-specific 3',5'-cyclic phosphodiesterase 4D|cAMP-specific phosphodiesterase PDE4D6|phosphodiesterase 4D, cAMP-specific (phosphodiesterase E3 dunce homolog, Drosophila)|testicular tissue protein Li 136	5q11.2-q12.1	5	NC_000005.10	58969038	60524329	minus	39	600129
9606	Homo sapiens	55687	0	live	TRMU	LCAL3, MTO2, MTU1, TRMT, TRMT1	tRNA 5-methylaminomethyl-2-thiouridylate methyltransferase	mitochondrial tRNA-specific 2-thiouridylase 1|MTO2 homolog|lung cancer associated lncRNA 3|mitochondrial 5-methylaminomethyl-2-thiouridylate-methyltransferase	22q13.31	22	NC_000022.11	46335714	46357340	plus	12	610230
9606	Homo sapiens	65268	0	live	WNK2	NY-CO-43, P/OKcl.13, PRKWNK2, SDCCAG43	WNK lysine deficient protein kinase 2	serine/threonine-protein kinase WNK2|antigen NY-CO-43|mitogen-activated protein kinase kinase kinase|protein kinase lysine-deficient 2|protein kinase with no lysine 2|serologically defined colon cancer antigen 43	9q22.31	9	NC_000009.12	93184156	93327581	plus	38	606249
9606	Homo sapiens	332	0	live	BIRC5	API4, EPR-1	baculoviral IAP repeat containing 5	baculoviral IAP repeat-containing protein 5|apoptosis inhibitor 4|apoptosis inhibitor survivin|survivin variant 3 alpha	17q25.3	17	NC_000017.11	78214253	78225635	plus	6	603352
9606	Homo sapiens	157638	0	live	LRATD2	BCMP101, FAM84B, NSE2	LRAT domain containing 2	protein LRATD2|breast cancer membrane protein 101|breast cancer membrane-associated protein 101|family with sequence similarity 84 member B|neurological/sensory 2|protein FAM84B	8q24.21	8	NC_000008.11	126552443	126558498	minus	3	609483
9606	Homo sapiens	22858	0	live	CILK1	ECO, EJM10, ICK, LCK2, MRK, hICK	ciliogenesis associated kinase 1	serine/threonine-protein kinase ICK|MAK-related kinase|iciliogenesis associated kinase 1|intestinal cell (MAK-like) kinase|intestinal cell kinase|laryngeal cancer kinase 2|serine/threonine protein kinase	6p12.1	6	NC_000006.12	53001299	53061824	minus	18	612325
9606	Homo sapiens	85415	0	live	RHPN2	P76RBE, RHOBP	rhophilin Rho GTPase binding protein 2	rhophilin-2|76 kDa RhoB effector protein|GTP-Rho-binding protein 2|rhophilin-like Rho-GTPase binding protein	19q13.11	19	NC_000019.10	32978592	33064888	minus	15	617932
9606	Homo sapiens	84519	0	live	ACRBP	CT23, OY-TES-1, SP32	acrosin binding protein	acrosin-binding protein|cancer/testis antigen 23|cancer/testis antigen OY-TES-1|proacrosin binding protein sp32|testicular tissue protein Li 10	12p13.31	12	NC_000012.12	6638075	6647432	minus	10	608352
9606	Homo sapiens	112744	0	live	IL17F	CANDF6, IL-17F, ML-1, ML1	interleukin 17F	interleukin-17F|cytokine ML-1	6p12.2	6	NC_000006.12	52236681	52245689	minus	4	606496
9606	Homo sapiens	541466	0	live	CT45A1	CT45, CT45-1, CT45.1	cancer/testis antigen family 45 member A1	cancer/testis antigen family 45 member A1|cancer/testis antigen 45-1|cancer/testis antigen 45A1|cancer/testis antigen CT45-1	Xq26.3	X	NC_000023.11	135708398	135723318	plus	6	300648
9606	Homo sapiens	124359	0	live	CDYL2	PCCP1	chromodomain Y like 2	chromodomain Y-like protein 2|CDY-like 2|chromodomain protein, Y-like 2|prostate cancer candidate protein 1, PCCP1	16q23.2	16	NC_000016.10	80597899	80805043	minus	10
9606	Homo sapiens	2147	0	live	F2	PT, RPRGL2, THPH1	coagulation factor II, thrombin	prothrombin|prepro-coagulation factor II|prothrombin B-chain|serine protease|thrombin factor II	11p11.2	11	NC_000011.10	46719201	46739506	plus	14	176930
9606	Homo sapiens	2950	0	live	GSTP1	DFN7, FAEES3, GST3, GSTP, HEL-S-22, PI	glutathione S-transferase pi 1	glutathione S-transferase P|GST class-pi|GSTP1-1|deafness, X-linked 7|epididymis secretory protein Li 22|fatty acid ethyl ester synthase III	11q13.2	11	NC_000011.10	67583812	67586653	plus	7	134660
9606	Homo sapiens	3605	0	live	IL17A	CTLA-8, CTLA8, IL-17, IL-17A, IL17	interleukin 17A	interleukin-17A|cytotoxic T-lymphocyte-associated antigen 8|cytotoxic T-lymphocyte-associated protein 8|interleukin 17 (cytotoxic T-lymphocyte-associated serine esterase 8)	6p12.2	6	NC_000006.12	52186375	52190638	plus	3	603149
9606	Homo sapiens	6647	0	live	SOD1	ALS, ALS1, HEL-S-44, IPOA, SOD, STAHP, hSod1, homodimer	superoxide dismutase 1	superoxide dismutase [Cu-Zn]|Cu/Zn superoxide dismutase|SOD, soluble|epididymis secretory protein Li 44|indophenoloxidase A|superoxide dismutase 1, soluble|superoxide dismutase, cystolic	21q22.11	21	NC_000021.9	31659693	31668931	plus	5	147450
9606	Homo sapiens	78986	0	live	DUSP26	DSP-4, DUSP24, LDP-4, LDP4, MKP-8, MKP8, NATA1, NEAP, SKRP3	dual specificity phosphatase 26	dual specificity protein phosphatase 26|MAP kinase phosphatase 8|Novel amplified gene in thyroid anaplastic cancer|dual specificity phosphatase 26 (putative)|dual specificity phosphatase SKRP3|low-molecular-mass dual-specificity phosphatase 4|mitogen-activated protein kinase phosphatase 8|neuroendocrine-associated phosphatase	8p12	8	NC_000008.11	33591330	33600106	minus	4	618368
9606	Homo sapiens	10813	0	live	UTP14A	NYCO16, SDCCAG16, Utp14, dJ537K23.3	UTP14A small subunit processome component	U3 small nucleolar RNA-associated protein 14 homolog A|UTP14, U3 small nucleolar ribonucleoprotein, homolog A|UTP14A small subunit (SSU) processome component|antigen NY-CO-16|serologically defined colon cancer antigen 16	Xq26.1	X	NC_000023.11	129906121	129929762	plus	17	300508
9606	Homo sapiens	285782	0	live	CAGE1	CT3, CT95, CTAG3, bA69L16.7	cancer antigen 1	cancer-associated gene 1 protein|cancer/testis antigen 3|cancer/testis antigen 95|cancer/testis antigen gene 1	6p24.3	6	NC_000006.12	7326659	7389742	minus	15	608304
9606	Homo sapiens	330	0	live	BIRC3	AIP1, API2, CIAP2, HAIP1, HIAP1, IAP-1, MALT2, MIHC, RNF49, c-IAP2	baculoviral IAP repeat containing 3	baculoviral IAP repeat-containing protein 3|IAP homolog C|RING finger protein 49|RING-type E3 ubiquitin transferase BIRC3|TNFR2-TRAF signaling complex protein|TNFR2-TRAF-signaling complex protein 1|apoptosis inhibitor 2|cellular inhibitor of apoptosis 2|inhibitor of apoptosis protein 1|mammalian IAP homolog C	11q22.2	11	NC_000011.10	102317373	102339403	plus	9	601721
9606	Homo sapiens	80705	0	live	TSGA10	CEP4L, CT79, SPGF26	testis specific 10	testis-specific gene 10 protein|cancer/testis antigen 79|testis development protein NYD-SP7|testis-specific 10 protein	2q11.2	2	NC_000002.12	98997261	99154966	minus	32	607166
9606	Homo sapiens	7097	0	live	TLR2	CD282, TIL4	toll like receptor 2	toll-like receptor 2|toll/interleukin-1 receptor-like protein 4	4q31.3	4	NC_000004.12	153684080	153710643	plus	5	603028
9606	Homo sapiens	2237	0	live	FEN1	FEN-1, MF1, RAD2	flap structure-specific endonuclease 1	flap endonuclease 1|DNase IV|maturation factor-1	11q12.2	11	NC_000011.10	61792911	61797238	plus	2	600393
9606	Homo sapiens	80762	0	live	NDFIP1	N4WBP5	Nedd4 family interacting protein 1	NEDD4 family-interacting protein 1|Nedd4 WW domain-binding protein 5|breast cancer-associated protein SGA-1M|putative MAPK-activating protein PM13|putative NF-kappa-B-activating protein 164|putative NFKB and MAPK-activating protein	5q31.3	5	NC_000005.10	142108779	142154440	plus	8	612050
9606	Homo sapiens	1493	0	live	CTLA4	ALPS5, CD, CD152, CELIAC3, CTLA-4, GRD4, GSE, IDDM12	cytotoxic T-lymphocyte associated protein 4	cytotoxic T-lymphocyte protein 4|CD152 isoform|celiac disease 3|cytotoxic T lymphocyte associated antigen 4 short spliced form|cytotoxic T-lymphocyte-associated serine esterase-4|insulin-dependent diabetes mellitus 12|ligand and transmembrane spliced cytotoxic T lymphocyte associated antigen 4	2q33.2	2	NC_000002.12	203867771	203873965	plus	4	123890
9606	Homo sapiens	6847	0	live	SYCP1	CT8, HOM-TES-14, SCP-1, SCP1	synaptonemal complex protein 1	synaptonemal complex protein 1|cancer/testis antigen 8|testicular tissue protein Li 191	1p13.2	1	NC_000001.11	114854268	114995370	plus	38	602162
9606	Homo sapiens	2074	0	live	ERCC6	ARMD5, CKN2, COFS, COFS1, CSB, CSB-PGBD3, POF11, RAD26, UVSS1	ERCC excision repair 6, chromatin remodeling factor	DNA excision repair protein ERCC-6|ERCC6-PGBD3 fusion protein|ATP-dependent helicase ERCC6|Chimeric CSB-PGBD3 protein|Chimeric ERCC6-PGBD3 protein|Cockayne syndrome group B protein|cockayne syndrome protein CSB|excision repair cross-complementation group 6|excision repair cross-complementing rodent repair deficiency, complementation group 6	10q11.23	10	NC_000010.11	49454470	49539538	minus	23	609413
9606	Homo sapiens	408259	0	live	HPC3	HPC20	Prostate cancer, hereditary, 3		20q13	20						608656
9606	Homo sapiens	9887	0	live	SMG7	C1orf16, EST1C, SGA56M	SMG7 nonsense mediated mRNA decay factor	protein SMG7|EST1 telomerase component homolog C|EST1-like protein C|breast cancer-associated antigen SGA-56M|ever shorter telomeres 1C|smg-7 homolog, nonsense mediated mRNA decay factor	1q25.3	1	NC_000001.11	183471993	183554193	plus	27	610964
9606	Homo sapiens	1012	0	live	CDH13	CDHH, P105	cadherin 13	cadherin-13|H-cadherin (heart)|T-cad|T-cadherin|cadherin 13, H-cadherin (heart)|heart cadherin	16q23.3	16	NC_000016.10	82626823	83800640	plus	20	601364
9606	Homo sapiens	1731	0	live	SEPTIN1	DIFF6, LARP, PNUTL3, SEP1, SEPT1	septin 1	septin-1|differentiation 6 (deoxyguanosine triphosphate triphosphohydrolase)|peanut-like protein 3|serologically defined breast cancer antigen NY-BR-24	16p11.2	16	NC_000016.10	30378135	30382830	minus	10	612897
9606	Homo sapiens	2153	0	live	F5	FVL, PCCF, RPRGL1, THPH2	coagulation factor V	coagulation factor V|activated protein c cofactor|coagulation factor V (proaccelerin, labile factor)|coagulation factor V jinjiang A2 domain|factor V Leiden	1q24.2	1	NC_000001.11	169511951	169586630	minus	25	612309
9606	Homo sapiens	4109	0	live	MAGEA10	CT1.10, MAGE10	MAGE family member A10	melanoma-associated antigen 10|MAGE-10 antigen|cancer/testis antigen 1.10|cancer/testis antigen family 1, member 10|melanoma antigen family A, 10|melanoma antigen family A10	Xq28	X	NC_000023.11	152133310	152138578	minus	5	300343
9606	Homo sapiens	3105	0	live	HLA-A	HLAA	major histocompatibility complex, class I, A	HLA class I histocompatibility antigen, A alpha chain|HLA class I histocompatibility antigen, A-1 alpha chain|MHC class I antigen HLA-A heavy chain|leukocyte antigen class I-A	6p22.1	6	NC_000006.12	29942532	29945870	plus	8	142800
9606	Homo sapiens	4780	0	live	NFE2L2	HEBP1, IMDDHH, NRF2, Nrf-2	nuclear factor, erythroid 2 like 2	nuclear factor erythroid 2-related factor 2|nuclear factor erythroid-derived 2-like 2	2q31.2	2	NC_000002.12	177230303	177265131	minus	6	600492
9606	Homo sapiens	84944	0	live	MAEL	CT128, SPATA35	maelstrom spermatogenic transposon silencer	protein maelstrom homolog|cancer/testis antigen 128|maelstrom homolog|spermatogenesis associated 35|testicular tissue protein Li 116	1q24.1	1	NC_000001.11	166921121	167022214	plus	17	611368
9606	Homo sapiens	84725	0	live	PLEKHA8	FAPP2	pleckstrin homology domain containing A8	pleckstrin homology domain-containing family A member 8|PH domain-containing family A member 8|phosphatidylinositol 4-phosphate adaptor protein-2|phosphatidylinositol-four-phosphate adapter protein 2|phosphoinositol 4-phosphate adapter protein 2|pleckstrin homology domain containing, family A (phosphoinositide binding specific) member 8|serologically defined breast cancer antigen NY-BR-86	7p14.3	7	NC_000007.14	30028361	30130483	plus	19	608639
9606	Homo sapiens	960	0	live	CD44	CDW44, CSPG8, ECMR-III, HCELL, HUTCH-I, IN, LHR, MC56, MDU2, MDU3, MIC4, Pgp1	CD44 molecule (Indian blood group)	CD44 antigen|GP90 lymphocyte homing/adhesion receptor|Hermes antigen|Indian blood group antigen|cell surface glycoprotein CD44|chondroitin sulfate proteoglycan 8|epican|extracellular matrix receptor III|hematopoietic cell E- and L-selectin ligand|heparan sulfate proteoglycan|homing function and Indian blood group system|hyaluronate receptor|phagocytic glycoprotein 1|soluble CD44	11p13	11	NC_000011.10	35139168	35232402	plus	21	107269
9606	Homo sapiens	155465	0	live	AGR3	AG-3, AG3, BCMP11, HAG3, PDIA18, hAG-3	anterior gradient 3, protein disulphide isomerase family member	anterior gradient protein 3|anterior gradient homolog 3|anterior gradient protein 3 homolog|breast cancer membrane protein 11|protein disulfide isomerase family A, member 18	7p21.1	7	NC_000007.14	16854711	16881983	minus	10	609482
9606	Homo sapiens	4851	0	live	NOTCH1	AOS5, AOVD1, TAN1, hN1	notch receptor 1	neurogenic locus notch homolog protein 1|Notch homolog 1, translocation-associated|notch 1|translocation-associated notch protein TAN-1	9q34.3	9	NC_000009.12	136494433	136546048	minus	34	190198
9606	Homo sapiens	6387	0	live	CXCL12	IRH, PBSF, SCYB12, SDF1, TLSF, TPAR1	C-X-C motif chemokine ligand 12	stromal cell-derived factor 1|chemokine (C-X-C motif) ligand 12|intercrine reduced in hepatomas|pre-B cell growth-stimulating factor	10q11.21	10	NC_000010.11	44292088	44385097	minus	9	600835
9606	Homo sapiens	329	0	live	BIRC2	API1, HIAP2, Hiap-2, MIHB, RNF48, c-IAP1, cIAP1	baculoviral IAP repeat containing 2	baculoviral IAP repeat-containing protein 2|IAP homolog B|IAP-2|NFR2-TRAF signalling complex protein|RING finger protein 48|RING-type E3 ubiquitin transferase BIRC2|TNFR2-TRAF-signaling complex protein 2|apoptosis inhibitor 1|cellular inhibitor of apoptosis 1|inhibitor of apoptosis protein 2	11q22.2	11	NC_000011.10	102347182	102378670	plus	9	601712
9606	Homo sapiens	54894	0	live	RNF43	RNF124, SSPCS, URCC	ring finger protein 43	E3 ubiquitin-protein ligase RNF43|RING-type E3 ubiquitin transferase RNF43	17q22	17	NC_000017.11	58352500	58418894	minus	11	612482
9606	Homo sapiens	4233	0	live	MET	AUTS9, DFNB97, HGFR, RCCP2, c-Met	MET proto-oncogene, receptor tyrosine kinase	hepatocyte growth factor receptor|HGF receptor|HGF/SF receptor|SF receptor|proto-oncogene c-Met|scatter factor receptor|tyrosine-protein kinase Met	7q31.2	7	NC_000007.14	116672196	116798386	plus	24	164860
9606	Homo sapiens	406991	0	live	MIR21	MIRN21, hsa-mir-21, miR-21, miRNA21	microRNA 21		17q23.1	17	NC_000017.11	59841266	59841337	plus	1	611020
9606	Homo sapiens	941	0	live	CD80	B7, B7-1, B7.1, BB1, CD28LG, CD28LG1, LAB7	CD80 molecule	T-lymphocyte activation antigen CD80|B-lymphocyte activation antigen B7|CD80 antigen (CD28 antigen ligand 1, B7-1 antigen)|CTLA-4 counter-receptor B7.1|activation B7-1 antigen|costimulatory factor CD80|costimulatory molecule variant IgV-CD80	3q13.33	3	NC_000003.12	119524293	119559614	minus	7	112203
9606	Homo sapiens	3077	0	live	HFE	HFE1, HH, HLA-H, MVCD7, TFQTL2	homeostatic iron regulator	hereditary hemochromatosis protein|MHC class I-like protein HFE|hereditary hemochromatosis protein HLA-H|high Fe	6p22.2	6	NC_000006.12	26087281	26098343	plus	7	613609
9606	Homo sapiens	676	0	live	BRDT	BRD6, CT9, SPGF21	bromodomain testis associated	bromodomain testis-specific protein|RING3-like protein|bromodomain, testis-specific|cancer/testis antigen 9	1p22.1	1	NC_000001.11	91949371	92014428	plus	21	602144
9606	Homo sapiens	102723547	0	live	CSAG2	CSAG3, CSAG3B, CT24.2, TRAG-3, TRAG3	CSAG family member 2	chondrosarcoma-associated gene 2/3 protein|CSAG family, member 3B|cancer/testis antigen 24.2|cancer/testis antigen family 24, member 2|chondrosarcoma-associated gene 2/3 protein-like|taxol resistance associated gene 3|taxol-resistant-associated gene 3 protein	Xq28	X	NC_000023.11	152708261	152713861	minus	5
9606	Homo sapiens	79697	0	live	RIOX1	C14orf169, JMJD9, MAPJD, NO66, ROX, URLC2, hsNO66	ribosomal oxygenase 1	ribosomal oxygenase 1|60S ribosomal protein L8 histidine hydroxylase|MYC-associated protein with JmjC domain|bifunctional lysine-specific demethylase and histidyl-hydroxylase NO66|histone lysine demethylase NO66|lysine-specific demethylase NO66|nucleolar protein 66|ribosomal oxygenase NO66|up-regulated in lung cancer 2	14q24.3	14	NC_000014.9	73490933	73493394	plus	1	611919
9606	Homo sapiens	10296	0	live	MAEA	EMLP, EMP, GID9, HLC-10, P44EMLP, PIG5	macrophage erythroblast attacher	E3 ubiquitin-protein transferase MAEA|GID complex subunit 9, FYV10 homolog|cell proliferation-inducing gene 5 protein|erythroblast macrophage protein|human lung cancer oncogene 10 protein|lung cancer-related protein 10	4p16.3	4	NC_000004.12	1289890	1340148	plus	13	606801
9606	Homo sapiens	56672	0	live	AKIP1	BCA3, C11orf17	A-kinase interacting protein 1	A-kinase-interacting protein 1|A kinase (PRKA) interacting protein 1|breast cancer associated gene 3|koyt binding protein 1|koyt binding protein 2|koyt binding protein 3|proline-rich protein BCA3	11p15.4	11	NC_000011.10	8911117	8920079	plus	6	609191
9606	Homo sapiens	100126794	0	live	GAEC1		gene amplified in esophageal cancer 1		7q22.1	7						612130
9606	Homo sapiens	59351	0	live	PBOV1	UC28, UROC28, dJ171N11.2	prostate and breast cancer overexpressed 1	prostate and breast cancer overexpressed gene 1 protein	6q23.3	6	NC_000006.12	138215986	138218490	minus	1	605669
9606	Homo sapiens	30014	0	live	SPANXA1	CT11.1, CT11.3, NAP-X, SPAN-X, SPAN-Xa, SPAN-Xb, SPANX, SPANX-A	sperm protein associated with the nucleus, X-linked, family member A1	sperm protein associated with the nucleus on the X chromosome A|Cancer/testis antigen 11.3|Cancer/testis-associated protein CTp11|Nuclear-associated protein SPAN-Xc|SPANX family member A|SPANX family, member A1|Sperm protein associated with the nucleus on the X chromosome C|cancer/testis antigen 11.1|cancer/testis antigen family 11, member 1|nuclear-associated protein SPAN-Xa|sperm protein associ…	Xq27.2	X	NC_000023.11	141583674	141584738	minus	2	300305
9606	Homo sapiens	10807	0	live	ENTR1	NY-CO-3, SDCCAG3, SDDAG3	endosome associated trafficking regulator 1	endosome-associated-trafficking regulator 1|antigen NY-CO-3|serologically defined colon cancer antigen 3	9q34.3	9	NC_000009.12	136401922	136410614	minus	10	618289
9606	Homo sapiens	3856	0	live	KRT8	CARD2, CK-8, CK8, CYK8, K2C8, K8, KO	keratin 8	keratin, type II cytoskeletal 8|cytokeratin-8|keratin 8, type II|type-II keratin Kb8	12q13.13	12	NC_000012.12	52897191	52949860	minus	10	148060
9606	Homo sapiens	23411	0	live	SIRT1	SIR2, SIR2L1, SIR2alpha	sirtuin 1	NAD-dependent protein deacetylase sirtuin-1|SIR2-like protein 1|regulatory protein SIR2 homolog 1|sirtuin type 1	10q21.3	10	NC_000010.11	67884656	67918390	plus	11	604479
9606	Homo sapiens	3651	0	live	PDX1	GSF, IDX-1, IPF1, IUF1, MODY4, PAGEN1, PDX-1, STF-1	pancreatic and duodenal homeobox 1	pancreas/duodenum homeobox protein 1|IPF-1|IUF-1|glucose-sensitive factor|insulin promoter factor 1, homeodomain transcription factor|insulin upstream factor 1|islet/duodenum homeobox-1|pancreatic-duodenal homeobox factor 1|somatostatin transcription factor 1|somatostatin-transactivating factor 1	13q12.2	13	NC_000013.11	27919982	27926313	plus	2	600733
9606	Homo sapiens	84072	0	live	HORMAD1	CT46, NOHMA	HORMA domain containing 1	HORMA domain-containing protein 1|cancer/testis antigen 46|newborn ovary HORMA protein|testis tissue sperm-binding protein Li 86P	1q21.3	1	NC_000001.11	150698060	150720910	minus	16	609824
9606	Homo sapiens	3815	0	live	KIT	C-Kit, CD117, MASTC, PBT, SCFR	KIT proto-oncogene, receptor tyrosine kinase	mast/stem cell growth factor receptor Kit|c-Kit protooncogene|p145 c-kit|piebald trait protein|proto-oncogene c-Kit|proto-oncogene tyrosine-protein kinase Kit|soluble KIT variant 1|tyrosine-protein kinase Kit|v-kit Hardy-Zuckerman 4 feline sarcoma viral oncogene homolog|v-kit Hardy-Zuckerman 4 feline sarcoma viral oncogene-like protein	4q12	4	NC_000004.12	54657928	54740715	plus	21	164920
9606	Homo sapiens	2908	0	live	NR3C1	GCCR, GCR, GCRST, GR, GRL	nuclear receptor subfamily 3 group C member 1	glucocorticoid receptor|glucocorticoid nuclear receptor variant 1|nuclear receptor subfamily 3 group C member 1 variant hGR-B(54)|nuclear receptor subfamily 3 group C member 1 variant hGR-B(77)|nuclear receptor subfamily 3 group C member 1 variant hGR-B(93)|nuclear receptor subfamily 3, group C, member 1 (glucocorticoid receptor)	5q31.3	5	NC_000005.10	143277931	143435512	minus	16	138040
9606	Homo sapiens	1565	0	live	CYP2D6	CPD6, CYP2D, CYP2D7AP, CYP2D7BP, CYP2D7P2, CYP2D8P2, CYP2DL1, CYPIID6, P450-DB1, P450C2D, P450DB1	cytochrome P450 family 2 subfamily D member 6	cytochrome P450 2D6|cholesterol 25-hydroxylase|cytochrome P450, family 2, subfamily D, polypeptide 6|cytochrome P450, family 2, subfamily D, polypeptide 7 pseudogene 2|cytochrome P450, family 2, subfamily D, polypeptide 8 pseudogene 2|cytochrome P450, subfamily II (debrisoquine, sparteine, etc., -metabolising), polypeptide 7 pseudogene 2|cytochrome P450, subfamily IID (debrisoquine, sparteine, et…	22q13.2	22	NC_000022.11	42126499	42130810	minus	9	124030
9606	Homo sapiens	3146	0	live	HMGB1	HMG-1, HMG1, HMG3, SBP-1	high mobility group box 1	high mobility group protein B1|Amphoterin|Sulfoglucuronyl carbohydrate binding protein|high-mobility group (nonhistone chromosomal) protein 1	13q12.3	13	NC_000013.11	30456704	30617597	minus	9	163905
9606	Homo sapiens	5395	0	live	PMS2	HNPCC4, MLH4CL, PMSL2, PMS2	PMS1 homolog 2, mismatch repair system component	mismatch repair endonuclease PMS2|DNA mismatch repair protein PMS2|PMS1 homolog 2, mismatch repair protein|PMS1 protein homolog 2|PMS2 postmeiotic segregation increased 2|postmeiotic segregation increased 2 nirs variant 6	7p22.1	7	NC_000007.14	5970925	6009106	minus	16	600259
9606	Homo sapiens	1557	0	live	CYP2C19	CPCJ, CYP2C, CYPIIC17, CYPIIC19, P450C2C, P450IIC19	cytochrome P450 family 2 subfamily C member 19	cytochrome P450 2C19|(R)-limonene 6-monooxygenase|(S)-limonene 6-monooxygenase|(S)-limonene 7-monooxygenase|S-mephenytoin 4-hydroxylase|cytochrome P-450 II C|cytochrome P450, family 2, subfamily C, polypeptide 19|cytochrome P450, subfamily IIC (mephenytoin 4-hydroxylase), polypeptide 19|cytochrome P450-11A|cytochrome P450-254C|fenbendazole monooxygenase (4'-hydroxylating)|flavoprotein-linked mono…	10q23.33	10	NC_000010.11	94762681	94855547	plus	9	124020
9606	Homo sapiens	6759	0	live	SSX4	CT5.4	SSX family member 4	protein SSX4|cancer/testis antigen 5.4|synovial sarcoma, X breakpoint 4	Xp11.23	X	NC_000023.11	48383527	48393347	plus	9	300326
9606	Homo sapiens	23301	0	live	EHBP1	HPC12, NACSIN	EH domain binding protein 1	EH domain-binding protein 1|NPF calponin-like protein|testis tissue sperm-binding protein Li 50e	2p15	2	NC_000002.12	62673878	63046487	plus	30	609922
9606	Homo sapiens	154	0	live	ADRB2	ADRB2R, ADRBR, B2AR, BAR, BETA2AR	adrenoceptor beta 2	beta-2 adrenergic receptor|adrenergic, beta-2-, receptor, surface|adrenoceptor beta 2 surface|beta-2 adrenoceptor|beta-2 adrenoreceptor|catecholamine receptor	5q32	5	NC_000005.10	148826593	148828634	plus	1	109690
9606	Homo sapiens	339967	0	live	TMPRSS11A	ECRG1	transmembrane serine protease 11A	transmembrane protease serine 11A|airway trypsin-like protease 1|epidermal type-II transmembrane serine protease|esophageal cancer-susceptibility gene 1 protein|transmembrane protease, serine 11A	4q13.2	4	NC_000004.12	67909395	67963493	minus	10	611704
9606	Homo sapiens	355	0	live	FAS	ALPS1A, APO-1, APT1, CD951, FASTM, TNFRSF6, FAS	Fas cell surface death receptor	tumor necrosis factor receptor superfamily member 6|APO-1 cell surface antigen|CD95 antigen|FASLG receptor|Fas (TNF receptor superfamily, member 6)|Fas AMA|TNF receptor superfamily member 6|apoptosis antigen 1|apoptosis signaling receptor FAS|apoptosis-mediating surface antigen FAS|mutant tumor necrosis receptor superfamily member 6|tumor necrosis factor receptor superfamily, member 6	10q23.31	10	NC_000010.11	88968429	89017059	plus	15	134637
9606	Homo sapiens	7180	0	live	CRISP2	CRISP-2, CT36, GAPDL5, TPX1, TSP1	cysteine rich secretory protein 2	cysteine-rich secretory protein 2|cancer/testis antigen 36|glyceraldehyde-3-phosphate dehydrogenase-like 5|testicular tissue protein Li 43|testis specific protein 1 (probe H4-1 p3-1)|testis-specific protein TPX-1	6p12.3	6	NC_000006.12	49676665	49714198	minus	14	187430
9606	Homo sapiens	3162	0	live	HMOX1	HMOX1D, HO-1, HSP32, bK286B10	heme oxygenase 1	heme oxygenase 1|heat shock protein, 32-kD|heme oxygenase (decycling) 1	22q12.3	22	NC_000022.11	35381096	35394207	plus	5	141250
9606	Homo sapiens	3383	0	live	ICAM1	BB2, CD54, P3.58	intercellular adhesion molecule 1	intercellular adhesion molecule 1|ICAM-1|cell surface glycoprotein P3.58|epididymis secretory sperm binding protein|intercellular adhesion molecule 1 (CD54), human rhinovirus receptor|major group rhinovirus receptor	19p13.2	19	NC_000019.10	10271120	10286615	plus	7	147840
9606	Homo sapiens	1589	0	live	CYP21A2	CA21H, CAH1, CPS1, CYP21, CYP21B, P450c21B	cytochrome P450 family 21 subfamily A member 2	steroid 21-hydroxylase|21-OHase|cytochrome P450 XXI|cytochrome P450, family 21, subfamily A, polypeptide 2|cytochrome P450, subfamily XXIA (steroid 21-hydroxylase, congenital adrenal hyperplasia), polypeptide 2|cytochrome P450-C21B|steroid 21 hydroxylase|steroid 21-monooxygenase	6p21.33	6	NC_000006.12	32038306	32041670	plus	10	613815
9606	Homo sapiens	10499	0	live	NCOA2	GRIP1, KAT13C, NCoA-2, SRC2, TIF2, bHLHe75	nuclear receptor coactivator 2	nuclear receptor coactivator 2|class E basic helix-loop-helix protein 75|glucocorticoid receptor-interacting protein-1|p160 steroid receptor coactivator 2|transcriptional intermediary factor 2	8q13.3	8	NC_000008.11	70109770	70405390	minus	31	601993
9606	Homo sapiens	5970	0	live	RELA	CMCU, NFKB3, p65	RELA proto-oncogene, NF-kB subunit	transcription factor p65|NF-kappa-B p65delta3|NF-kappa-B transcription factor p65|nuclear factor NF-kappa-B p65 subunit|nuclear factor of kappa light polypeptide gene enhancer in B-cells 3|v-rel avian reticuloendotheliosis viral oncogene homolog A|v-rel reticuloendotheliosis viral oncogene homolog A	11q13.1	11	NC_000011.10	65653596	65662972	minus	12	164014
9606	Homo sapiens	9703	0	live	KIAA0100	BCOX, BCOX1, CT101, FMP27	KIAA0100	protein KIAA0100|U937-associated antigen|antigen MLAA-22|breast cancer overexpressed gene 1|breast cancer-overexpressed gene 1 protein|cancer/testis antigen 101	17q11.2	17	NC_000017.11	28614440	28645159	minus	40	610664
9606	Homo sapiens	2100	0	live	ESR2	ER-BETA, ESR-BETA, ESRB, ESTRB, Erb, NR3A2, ODG8	estrogen receptor 2	estrogen receptor beta|estrogen receptor beta 4|estrogen receptor beta splice variant, ERbeta2delta7|estrogen receptor beta splice variant, ERbeta4delta7|estrogen receptor beta splice variant, ERbeta6|estrogen receptor beta splice variant, ERbeta6delta7|estrogen receptor beta splice variant, ERbeta7|estrogen receptor beta splice variant, ERbeta7delta7|estrogen receptor beta splice variant, ERbeta…	14q23.2-q23.3	14	NC_000014.9	64226707	64338631	minus	18	601663
9606	Homo sapiens	27248	0	live	ERLEC1	C2orf30, CIM, CL24936, CL25084, HEL117, XTP3-B, XTP3TPB	endoplasmic reticulum lectin 1	endoplasmic reticulum lectin 1|ER lectin|XTP3-transactivated gene B protein|XTP3-transactivated protein B|cancer invasion and metastasis-related|epididymis luminal protein 117|erlectin 1	2p16.2	2	NC_000002.12	53786931	53834524	plus	16	611229
9606	Homo sapiens	6696	0	live	SPP1	BNSP, BSPI, ETA-1, OPN	secreted phosphoprotein 1	osteopontin|SPP1/CALPHA1 fusion|early T-lymphocyte activation 1|nephropontin|osteopontin/immunoglobulin alpha 1 heavy chain constant region fusion protein|secreted phosphoprotein 1 (osteopontin, bone sialoprotein I, early T-lymphocyte activation 1)|secreted phosphoprotein 1 variant 6|urinary stone protein|uropontin	4q22.1	4	NC_000004.12	87975650	87983411	plus	8	166490
9606	Homo sapiens	11236	0	live	RNF139	HRCA1, RCA1, TRC8	ring finger protein 139	E3 ubiquitin-protein ligase RNF139|RING-type E3 ubiquitin transferase RNF139|multiple membrane spanning receptor TRC8|patched related protein translocated in renal cancer|translocation in renal carcinoma on chromosome 8 protein|translocation in renal carcinoma, chromosome 8	8q24.13	8	NC_000008.11	124474880	124488618	plus	2	603046
9606	Homo sapiens	147945	0	live	NLRP4	CLR19.5, CT58, NALP4, PAN2, PYPAF4, RNH2	NLR family pyrin domain containing 4	NACHT, LRR and PYD domains-containing protein 4|NACHT, leucine rich repeat and PYD containing 4|PAAD and NACHT-containing protein 2|PYRIN and NACHT-containing protein 2|PYRIN-containing APAF1-like protein 4|cancer/testis antigen 58|nucleotide-binding oligomerization domain, leucine rich repeat and pyrin domain containing 4|ribonuclease inhibitor 2	19q13.43	19	NC_000019.10	55836540	55881855	plus	10	609645
9606	Homo sapiens	50943	0	live	FOXP3	AIID, DIETER, IPEX, JM2, PIDX, XPID	forkhead box P3	forkhead box protein P3|FOXP3delta7|immune dysregulation, polyendocrinopathy, enteropathy, X-linked|immunodeficiency, polyendocrinopathy, enteropathy, X-linked|scurfin	Xp11.23	X	NC_000023.11	49250436	49264932	minus	12	300292
9606	Homo sapiens	3606	0	live	IL18	IGIF, IL-18, IL-1g, IL1F4	interleukin 18	interleukin-18|IFN-gamma-inducing factor|IL-1 gamma|iboctadekin|interleukin 18 (interferon-gamma-inducing factor)|interleukin-1 gamma	11q23.1	11	NC_000011.10	112143251	112164104	minus	6	600953
9606	Homo sapiens	139135	0	live	PASD1	CT63, CT64, OXTES1	PAS domain containing repressor 1	circadian clock protein PASD1|PAS domain containing 1|cancer/testis antigen 63	Xq28	X	NC_000023.11	151563184	151676739	plus	16	300993
9606	Homo sapiens	89885	0	live	FATE1	CT43, FATE	fetal and adult testis expressed 1	fetal and adult testis-expressed transcript protein|BJ-HCC-2 antigen|cancer/testis antigen 43|tumor antigen BJ-HCC-2	Xq28	X	NC_000023.11	151716035	151723194	plus	5	300450
9606	Homo sapiens	100270680	0	live	CASC11	CARLO7, CARLo-7, LINC00990, MYMLR, TCONS_00014535	cancer susceptibility 11	MYC-modulating lncRNA|cancer susceptibility 11 (non-protein coding)|cancer susceptibility candidate 11 (non-protein coding)|long intergenic non-protein coding RNA 990	8q24.21	8	NC_000008.11	127700608	127733967	minus	5	617704
9606	Homo sapiens	4855	0	live	NOTCH4	INT3	notch receptor 4	neurogenic locus notch homolog protein 4|Notch homolog 4|notch 4	6p21.32	6	NC_000006.12	32194843	32224067	minus	31	164951
9606	Homo sapiens	3135	0	live	HLA-G	MHC-G	major histocompatibility complex, class I, G	HLA class I histocompatibility antigen, alpha chain G|HLA G antigen|HLA-G histocompatibility antigen, class I, G|MHC class I antigen G|MHC class Ib antigen|b2 microglobulin|mutant MHC class I antigen|mutant MHC class Ib antigen	6p22.1	6	NC_000006.12	29826979	29831130	plus	9	142871
9606	Homo sapiens	6041	0	live	RNASEL	PRCA1, RNS4	ribonuclease L	2-5A-dependent ribonuclease|2',5'-oligoisoadenylate synthetase-dependent|2-5A-dependent RNase|RNase L|interferon-induced 2-5A-dependent RNase|ribonuclease 4	1q25.3	1	NC_000001.11	182573634	182589285	minus	8	180435
9606	Homo sapiens	51614	0	live	ERGIC3	C20orf47, C2orf47, CGI-54, Erv46, NY-BR-84, PRO0989, SDBCAG84, dJ477O4.2	ERGIC and golgi 3	endoplasmic reticulum-Golgi intermediate compartment protein 3|endoplasmic reticulum-localized protein ERp43|serologically defined breast cancer antigen 84|serologically defined breast cancer antigen NY-BR-84	20q11.22	20	NC_000020.11	35542078	35557634	plus	14	616971
9606	Homo sapiens	3565	0	live	IL4	BCGF-1, BCGF1, BSF-1, BSF1, IL-4	interleukin 4	interleukin-4|B cell growth factor 1|B_cell stimulatory factor 1|binetrakin|interleukin 4 variant 2|lymphocyte stimulatory factor 1|pitrakinra	5q31.1	5	NC_000005.10	132673986	132682678	plus	5	147780
9606	Homo sapiens	120892	0	live	LRRK2	AURA17, DARDARIN, PARK8, RIPK7, ROCO2	leucine rich repeat kinase 2	leucine-rich repeat serine/threonine-protein kinase 2|augmented in rheumatoid arthritis 17	12q12	12	NC_000012.12	40224890	40369285	plus	54	609007
9606	Homo sapiens	5794	0	live	PTPRH	R-PTP-H, SAP1	protein tyrosine phosphatase receptor type H	receptor-type tyrosine-protein phosphatase H|stomach cancer-associated protein tyrosine phosphatase 1|transmembrane-type protein-tyrosine phosphatase type H	19q13.42	19	NC_000019.10	55181247	55209506	minus	23	602510
9606	Homo sapiens	25976	0	live	TIPARP	ARTD14, PARP7, pART14	TCDD inducible poly(ADP-ribose) polymerase	protein mono-ADP-ribosyltransferase TIPARP|ADP-ribosyltransferase diphtheria toxin-like 14|poly [ADP-ribose] polymerase 7	3q25.31	3	NC_000003.12	156674590	156706770	plus	8	612480
9606	Homo sapiens	56001	0	live	NXF2	CT39, TAPL-2, TCP11X2	nuclear RNA export factor 2	nuclear RNA export factor 2|TAP-like protein 2|cancer/testis antigen 39|t-complex protein 11 homolog	Xq22.1	X	NC_000023.11	102247167	102326722	plus	23	300315
9606	Homo sapiens	92335	0	live	STRADA	LYK5, NY-BR-96, PMSE, STRAD, STRAD alpha, Stlk	STE20 related adaptor alpha	STE20-related kinase adapter protein alpha|STE20-like pseudokinase|STE20-related kinase adaptor alpha|protein kinase LYK5|serologically defined breast cancer antigen NY-BR-96	17q23.3	17	NC_000017.11	63702832	63741986	minus	14	608626
9606	Homo sapiens	1432	0	live	MAPK14	CSBP, CSBP1, CSBP2, CSPB1, EXIP, Mxi2, PRKM14, PRKM15, RK, SAPK2A, p38, p38ALPHA	mitogen-activated protein kinase 14	mitogen-activated protein kinase 14|CSAID-binding protein|MAP kinase 14|MAP kinase Mxi2|MAP kinase p38 alpha|MAX-interacting protein 2|cytokine suppressive anti-inflammatory drug binding protein|mitogen-activated protein kinase p38 alpha|p38 MAP kinase|p38 mitogen activated protein kinase|p38alpha Exip|stress-activated protein kinase 2A	6p21.31	6	NC_000006.12	36027677	36122964	plus	22	600289
9606	Homo sapiens	3992	0	live	FADS1	D5D, FADS6, FADSD5, LLCDL1, TU12	fatty acid desaturase 1	acyl-CoA (8-3)-desaturase|delta(5) desaturase|delta-5 fatty acid desaturase|linoleoyl-CoA desaturase (delta-6-desaturase)-like 1	11q12.2	11	NC_000011.10	61799627	61817003	minus	13	606148
9606	Homo sapiens	27122	0	live	DKK3	REIC, RIG	dickkopf WNT signaling pathway inhibitor 3	dickkopf-related protein 3|RIG-like 5-6|RIG-like 7-1|dickkopf 3 homolog|dickkopf homolog 3|dickkopf-3|dkk-3|hDkk-3|regulated in glioma	11p15.3	11	NC_000011.10	11962979	12009827	minus	12	605416
9606	Homo sapiens	1240	0	live	CMKLR1	CHEMERINR, ChemR23, DEZ, RVER1	chemerin chemokine-like receptor 1	chemokine-like receptor 1|G-protein coupled receptor ChemR23|G-protein coupled receptor DEZ|chemerin receptor|chemokine receptor-like 1|orphan G-protein coupled receptor, Dez|resolvin E1 receptor	12q23.3	12	NC_000012.12	108288044	108339347	minus	5	602351
9606	Homo sapiens	83639	0	live	TEX101	CT131, GTPR867, NYD-SP8, PRO1884, SGRG, SPATA44, TES101RP	testis expressed 101	testis-expressed protein 101|TES101-reactive protein|cancer/testis antigen 131|cell surface receptor NYD-SP8|scleroderma-associated autoantigen|spermatogenesis associated 44|spermatogenesis-related gene protein|testis expressed sequence 101|testis-expressed sequence 101 protein|testis-specific protein TES101RP	19q13.31	19	NC_000019.10	43388611	43418615	plus	10	612665
9606	Homo sapiens	6098	0	live	ROS1	MCF3, ROS, c-ros-1	ROS proto-oncogene 1, receptor tyrosine kinase	proto-oncogene tyrosine-protein kinase ROS|ROS proto-oncogene 1 , receptor tyrosine kinase|c-ros oncogene 1 , receptor tyrosine kinase|proto-oncogene c-Ros-1|transmembrane tyrosine-specific protein kinase|v-ros avian UR2 sarcoma virus oncogene homolog 1	6q22.1	6	NC_000006.12	117287918	117426065	minus	46	165020
9606	Homo sapiens	7450	0	live	VWF	F8VWF, VWD	von Willebrand factor	von Willebrand factor|coagulation factor VIII VWF	12p13.31	12	NC_000012.12	5948874	6124675	minus	52	613160
9606	Homo sapiens	2296	0	live	FOXC1	ARA, ASGD3, FKHL7, FREAC-3, FREAC3, IGDA, IHG1, IRID1, RIEG3	forkhead box C1	forkhead box protein C1|forkhead box C1 protein|forkhead, drosophila, homolog-like 7|forkhead-related activator 3|forkhead-related protein FKHL7|forkhead-related transcription factor 3|forkhead/winged helix-like transcription factor 7|myeloid factor-delta	6p25.3	6	NC_000006.12	1609915	1613897	plus	1	601090
9606	Homo sapiens	2932	0	live	GSK3B		glycogen synthase kinase 3 beta	glycogen synthase kinase-3 beta|GSK-3 beta|GSK3beta isoform|serine/threonine-protein kinase GSK3B	3q13.33	3	NC_000003.12	119821321	120095823	minus	13	605004
9606	Homo sapiens	183	0	live	AGT	ANHU, SERPINA8, hFLT1	angiotensinogen	angiotensinogen|alpha-1 antiproteinase, antitrypsin|angiotensin I|angiotensin II|fetal-liver predominant transporter 1|pre-angiotensinogen|serine (or cysteine) proteinase inhibitor|serpin A8|serpin peptidase inhibitor, clade A, member 8	1q42.2	1	NC_000001.11	230702523	230714122	minus	5	106150
9606	Homo sapiens	9699	0	live	RIMS2	OBOE, RAB3IP3, RIM2	regulating synaptic membrane exocytosis 2	regulating synaptic membrane exocytosis protein 2|RAB3 interacting protein 3|Rab3-interacting protein|non-small cell lung cancer RimL3a protein|non-small cell lung cancer RimL3c protein|nuclear protein|rab-3-interacting molecule 2|rab-3-interacting protein 3|rab3-interacting molecule 2	8q22.3	8	NC_000008.11	103499934	104256094	plus	42	606630
9606	Homo sapiens	5734	0	live	PTGER4	EP4, EP4R	prostaglandin E receptor 4	prostaglandin E2 receptor EP4 subtype|PGE receptor, EP4 subtype|PGE2 receptor EP4 subtype|prostaglandin E receptor 4 (subtype EP4)|prostanoid EP4 receptor	5p13.1	5	NC_000005.10	40679915	40740936	plus	7	601586
9606	Homo sapiens	335	0	live	APOA1	HPALP2, apo(a)	apolipoprotein A1	apolipoprotein A-I|apo-AI|epididymis secretory sperm binding protein	11q23.3	11	NC_000011.10	116835751	116837950	minus	4	107680
9606	Homo sapiens	6595	0	live	SMARCA2	BAF190, BRM, NCBRS, SNF2, SNF2L2, SNF2LA, SWI2, Sth1p, hBRM, hSNF2a	SWI/SNF related, matrix associated, actin dependent regulator of chromatin, subfamily a, member 2	probable global transcription activator SNF2L2|ATP-dependent helicase SMARCA2|BAF190B|BRG1-associated factor 190B|SNF2-alpha|SNF2/SWI2-like protein 2|SWI/SNF-related matrix-associated actin-dependent regulator of chromatin a2|brahma homolog|global transcription activator homologous sequence|protein brahma homolog|sucrose nonfermenting 2-like protein 2	9p24.3	9	NC_000009.12	2015347	2193624	plus	38	600014
9606	Homo sapiens	3480	0	live	IGF1R	CD221, IGFIR, IGFR, JTK13	insulin like growth factor 1 receptor	insulin-like growth factor 1 receptor|IGF-I receptor|soluble IGF1R variant 1|soluble IGF1R variant 2	15q26.3	15	NC_000015.10	98648539	98964530	plus	26	147370
9606	Homo sapiens	3662	0	live	IRF4	LSIRF, MUM1, NF-EM5, SHEP8	interferon regulatory factor 4	interferon regulatory factor 4|lymphocyte-specific interferon regulatory factor|multiple myeloma oncogene 1	6p25.3	6	NC_000006.12	391752	411443	plus	10	601900
9606	Homo sapiens	340706	0	live	VWA2	AMACO, CCSP-2, CCSP2, NET42	von Willebrand factor A domain containing 2	von Willebrand factor A domain-containing protein 2|a domain-containing protein similar to matrilin and collagen|colon cancer diagnostic marker|colon cancer secreted protein 2	10q25.3	10	NC_000010.11	114239254	114294500	plus	18	618281
9606	Homo sapiens	8105	0	live	BRCD1	BCDS1	cancer, familial, with in vitro radioresistance	Breast cancer, ductal, suppressor-1								114450
9606	Homo sapiens	2146	0	live	EZH2	ENX-1, ENX1b, KMT6, KMT6A, WVS, WVS2, EZH2	enhancer of zeste 2 polycomb repressive complex 2 subunit	histone-lysine N-methyltransferase EZH2|enhancer of zeste homolog 2|lysine N-methyltransferase 6	7q36.1	7	NC_000007.14	148807374	148884344	minus	25	601573
9606	Homo sapiens	6714	0	live	SRC	ASV1, THC6, c-SRC, p60-Src, SRC	SRC proto-oncogene, non-receptor tyrosine kinase	proto-oncogene tyrosine-protein kinase Src|proto-oncogene c-Src|protooncogene SRC, Rous sarcoma|tyrosine kinase pp60c-src|tyrosine-protein kinase SRC-1|v-src avian sarcoma (Schmidt-Ruppin A-2) viral oncogene homolog	20q11.23	20	NC_000020.11	37344685	37405432	plus	17	190090
9606	Homo sapiens	51738	0	live	GHRL	MTLRP	ghrelin and obestatin prepropeptide	appetite-regulating hormone|In2c-preproghrelin|ghrelin, growth hormone secretagogue receptor ligand|ghrelin/obestatin preprohormone|ghrelin/obestatin prepropeptide|growth hormone-releasing peptide|motilin-related peptide|prepro-appetite regulatory hormone|preproghrelin	3p25.3	3	NC_000003.12	10285666	10292947	minus	7	605353
9606	Homo sapiens	84312	0	live	BRMS1L	BRMS1	BRMS1 like transcriptional repressor	breast cancer metastasis-suppressor 1-like protein|BRMS1-homolog protein p40|BRMS1-like protein p40|breast cancer metastasis-suppressor 1|breast cancer metastasis-suppressor 1 like	14q13.2	14	NC_000014.9	35825596	35871963	plus	13	618514
9606	Homo sapiens	84528	0	live	RHOXF2	CT107, PEPP-2, PEPP2, THG1	Rhox homeobox family member 2	rhox homeobox family member 2|PEPP subfamily gene 2|cancer/testis antigen 107|homeobox protein from AL590526|paired-like homeobox protein PEPP-2|testis homeobox gene 1	Xq24	X	NC_000023.11	120158535	120165630	plus	4	300447
9606	Homo sapiens	9423	0	live	NTN1	MRMV4L, NTN1	netrin 1	netrin-1|epididymis tissue protein Li 131P|netrin 1, mouse, homolog of	17p13.1	17	NC_000017.11	9021510	9244000	plus	8	601614
9606	Homo sapiens	10809	0	live	STARD10	CGI-52, NY-CO-28, PCTP2, SDCCAG28	StAR related lipid transfer domain containing 10	START domain-containing protein 10|PCTP-L|PCTP-like protein|START domain containing 10|StAR-related lipid transfer (START) domain containing 10|antigen NY-CO-28|serologically defined colon cancer antigen 28|stAR-related lipid transfer protein 10	11q13.4	11	NC_000011.10	72754729	72793705	minus	7	617382
9606	Homo sapiens	151871	0	live	DPPA2	CT100, ECAT15-2, PESCRG1	developmental pluripotency associated 2	developmental pluripotency-associated protein 2|cancer/testis antigen 100|embryonic stem cell (ESC) associated transcript 15-2|pluripotent embryonic stem cell-related gene 1 protein	3q13.13	3	NC_000003.12	109293788	109316589	minus	11	614445
9606	Homo sapiens	51705	0	live	EMCN	EMCN2, MUC14	endomucin	endomucin|MUC-14|endomucin-2|gastric cancer antigen Ga34|mucin-14	4q24	4	NC_000004.12	100395341	100518052	minus	14	608350
9606	Homo sapiens	2706	0	live	GJB2	CX26, DFNA3, DFNA3A, DFNB1, DFNB1A, HID, KID, NSRD1, PPK	gap junction protein beta 2	gap junction beta-2 protein|connexin 26|gap junction beta 2 proteinc|gap junction protein, beta 2, 26kDa|mutant gap junction beta 2 protein|mutant gap junction protein beta 2	13q12.11	13	NC_000013.11	20187470	20192938	minus	3	121011
9606	Homo sapiens	5979	0	live	RET	CDHF12, CDHR16, HSCR1, MEN2A, MEN2B, MTC1, PTC-ELE1, RET	ret proto-oncogene	proto-oncogene tyrosine-protein kinase receptor Ret|RET receptor tyrosine kinase|cadherin family member 12|cadherin-related family member 16|proto-oncogene c-Ret|rearranged during transfection|ret proto-oncogene (multiple endocrine neoplasia and medullary thyroid carcinoma 1, Hirschsprung disease)	10q11.21	10	NC_000010.11	43077027	43130351	plus	20	164761
9606	Homo sapiens	10180	0	live	RBM6	3G2, DEF-3, DEF3, HLC-11, NY-LU-12, g16	RNA binding motif protein 6	RNA-binding protein 6|RNA-binding protein DEF-3|lung cancer antigen NY-LU-12|lung cancer protooncogene 11	3p21.31	3	NC_000003.12	49940041	50077249	plus	26	606886
9606	Homo sapiens	3690	0	live	ITGB3	BDPLT16, BDPLT2, CD61, GP3A, GPIIIa, GT	integrin subunit beta 3	integrin beta-3|antigen CD61|integrin beta 3|integrin beta chain, beta 3|integrin, beta 3 (platelet glycoprotein IIIa, antigen CD61)|platelet membrane glycoprotein IIIa	17q21.32	17	NC_000017.11	47253827	47313743	plus	15	173470
9606	Homo sapiens	642934	0	live	CERNA2	HOST2, lncRNA-HOST2	competing endogenous lncRNA 2 for microRNA let-7b	human ovarian cancer-specific transcript 2	10q23.1	10	NC_000010.11	84167228	84172076	minus	2	617434
9606	Homo sapiens	59	0	live	ACTA2	ACTSA	actin alpha 2, smooth muscle	actin, aortic smooth muscle|actin, alpha 2, smooth muscle, aorta|alpha-cardiac actin|cell growth-inhibiting gene 46 protein	10q23.31	10	NC_000010.11	88935074	88991397	minus	10	102620
9606	Homo sapiens	64127	0	live	NOD2	ACUG, BLAU, BLAUS, CARD15, CD, CLR16.3, IBD1, NLRC2B, PSORAS1, YAOS, NOD2	nucleotide binding oligomerization domain containing 2	nucleotide-binding oligomerization domain-containing protein 2|NLR family, CARD domain containing 2|NOD-like receptor C2|caspase recruitment domain family, member 15|caspase recruitment domain protein 15|caspase recruitment domain-containing protein 15|inflammatory bowel disease protein 1|nucleotide-binding oligomerization domain 2|nucleotide-binding oligomerization domain, leucine rich repeat an…	16q12.1	16	NC_000016.10	50693587	50733077	plus	18	605956
9606	Homo sapiens	3688	0	live	ITGB1	CD29, FNRB, GPIIA, MDF2, MSK12, VLA-BETA, VLAB	integrin subunit beta 1	integrin beta-1|glycoprotein IIa|integrin VLA-4 beta subunit|integrin beta 1|integrin, beta 1 (fibronectin receptor, beta polypeptide, antigen CD29 includes MDF2, MSK12)|very late activation protein, beta polypeptide	10p11.22	10	NC_000010.11	32900318	32958230	minus	18	135630
9606	Homo sapiens	9585	0	live	KIF20B	CT90, KRMP1, MPHOSPH1, MPP-1, MPP1	kinesin family member 20B	kinesin-like protein KIF20B|M-phase phosphoprotein 1|cancer/testis antigen 90|kinesin-related motor interacting with PIN1|mitotic kinesin-like protein|mitotic kinesin-related protein	10q23.31	10	NC_000010.11	89701590	89774943	plus	33	605498
9606	Homo sapiens	836	0	live	CASP3	CPP32, CPP32B, SCA-1	caspase 3	caspase-3|CASP-3|CPP-32|PARP cleavage protease|SREBP cleavage activity 1|apopain|caspase 3, apoptosis-related cysteine peptidase|caspase 3, apoptosis-related cysteine protease|cysteine protease CPP32|procaspase3|protein Yama	4q35.1	4	NC_000004.12	184627696	184649475	minus	9	600636
9606	Homo sapiens	142	0	live	PARP1	ADPRT, ADPRT 1, ADPRT1, ARTD1, PARP, PARP-1, PPOL, pADPRT-1	poly(ADP-ribose) polymerase 1	poly [ADP-ribose] polymerase 1|ADP-ribosyltransferase (NAD+; poly (ADP-ribose) polymerase)|ADP-ribosyltransferase NAD(+)|ADP-ribosyltransferase diphtheria toxin-like 1|DNA ADP-ribosyltransferase PARP1|NAD(+) ADP-ribosyltransferase 1|poly (ADP-ribose) polymerase family, member 1|poly(ADP-ribose) synthetase|poly(ADP-ribosyl)transferase|poly[ADP-ribose] synthase 1|protein poly-ADP-ribosyltransferase…	1q42.12	1	NC_000001.11	226360691	226408093	minus	23	173870
9606	Homo sapiens	126549	0	live	ANKLE1	ANKRD41, LEM3, LEMD6	ankyrin repeat and LEM domain containing 1	ankyrin repeat and LEM domain-containing protein 1|LEM domain containing 6|LEM-domain containing 3|ankyrin repeat domain-containing protein 41	19p13.11	19	NC_000019.10	17281901	17287646	plus	9
9606	Homo sapiens	1879	0	live	EBF1	COE1, EBF, O/E-1, OLF1	EBF transcription factor 1	transcription factor COE1|Collier, Olf and EBF transcription factor 1|early B cell factor 1|olfactory neuronal transcription factor 1	5q33.3	5	NC_000005.10	158695918	159099916	minus	22	164343
9606	Homo sapiens	1543	0	live	CYP1A1	AHH, AHRR, CP11, CYP1, CYPIA1, P1-450, P450-C, P450DX	cytochrome P450 family 1 subfamily A member 1	cytochrome P450 1A1|aryl hydrocarbon hydroxylase|cytochrome P1-450, dioxin-inducible|cytochrome P450 form 6|cytochrome P450, family 1, subfamily A, polypeptide 1|cytochrome P450, subfamily I (aromatic compound-inducible), polypeptide 1|cytochrome P450-C|cytochrome P450-P1|flavoprotein-linked monooxygenase|hydroperoxy icosatetraenoate dehydratase|xenobiotic monooxygenase	15q24.1	15	NC_000015.10	74719542	74725528	minus	7	108330
9606	Homo sapiens	8493	0	live	PPM1D	IDDGIP, JDVS, PP2C-DELTA, WIP1	protein phosphatase, Mg2+/Mn2+ dependent 1D	protein phosphatase 1D|protein phosphatase 1D magnesium-dependent, delta isoform|protein phosphatase 2C delta isoform|protein phosphatase Wip1|wild-type p53-induced phosphatase 1	17q23.2	17	NC_000017.11	60600187	60666280	plus	7	605100
9606	Homo sapiens	51535	0	live	PPHLN1	CR, HSPC206, HSPC232	periphilin 1	periphilin-1|CDC7 expression repressor|gastric cancer antigen Ga50	12q12	12	NC_000012.12	42326126	42448621	plus	16	608150
9606	Homo sapiens	407024	0	live	MIR29B1	MIRN29B1, miR-29b, miRNA29B1, mir-29b-1	microRNA 29b-1	hsa-mir-29b-1	7q32.3	7	NC_000007.14	130877459	130877539	minus	1	610783
9606	Homo sapiens	124912	0	live	SPACA3	ALLP17, CT54, LYC3, LYZC, LYZL3, SLLP1	sperm acrosome associated 3	sperm acrosome membrane-associated protein 3|cancer/testis antigen 54|lysozyme C|lysozyme-like acrosomal sperm-specific secretory protein ALLP-17|lysozyme-like protein 3|lysozyme-like sperm-specific secretory protein ALLP17|sperm lysozyme-like protein 1|sperm lyzozyme-like acrosomal protein 1|sperm protein reactive with ASA|sperm protein reactive with antisperm antibodies	17q11.2	17	NC_000017.11	32991847	32997877	plus	6	612749
9606	Homo sapiens	5002	0	live	SLC22A18	BWR1A, BWSCR1A, HET, IMPT1, ITM, ORCTL2, SLC22A1L, TSSC5, p45-BWR1A	solute carrier family 22 member 18	solute carrier family 22 member 18|beckwith-Wiedemann syndrome chromosomal region 1 candidate gene A protein|efflux transporter-like protein|imprinted multi-membrane-spanning polyspecific transporter-related protein 1|organic cation transporter-like protein 2|p45 Beckwith-Wiedemann region 1A|tumor-suppressing STF cDNA 5 protein|tumor-suppressing subchromosomal transferable fragment candidate gene…	11p15.4	11	NC_000011.10	2899691	2925246	plus	14	602631
9606	Homo sapiens	728695	0	live	SPANXB1	B1, CT11.2, SPANX-B, SPANXB, SPANXB2, SPANXF1, SPANXF2	SPANX family member B1	sperm protein associated with the nucleus on the X chromosome B1|SPANX family member B/F|SPANX family member F1|SPANX family, member B2|SPANX family, member F2|cancer/testis antigen 11.2|cancer/testis antigen family 11, member 2|nuclear-associated protein SPAN-Xb|nuclear-associated protein SPAN-Xf|sperm protein associated with the nucleus on the X chromosome B/F|sperm protein associated with the …	Xq27.1	X	NC_000023.11	141002594	141003706	plus	2	300669
9606	Homo sapiens	2515	0	live	ADAM2	CRYN1, CRYN2, CT15, FTNB, PH-30b, PH30, PH30-beta	ADAM metallopeptidase domain 2	disintegrin and metalloproteinase domain-containing protein 2|cancer/testis antigen 15|fertilin subunit beta	8p11.22	8	NC_000008.11	39743735	39838227	minus	21	601533
9606	Homo sapiens	5621	0	live	PRNP	ASCR, AltPrP, CD230, CJD, GSS, KURU, PRIP, PrP, PrP27-30, PrP33-35C, PrPc, p27-30	prion protein	major prion protein|alternative prion protein|CD230 antigen|prion-related protein	20p13	20	NC_000020.11	4686456	4701588	plus	2	176640
9606	Homo sapiens	857	0	live	CAV1	BSCL3, CGL3, LCCNS, MSTP085, PPH3, VIP21	caveolin 1	caveolin-1|caveolin 1, caveolae protein, 22kDa|cell growth-inhibiting protein 32	7q31.2	7	NC_000007.14	116525009	116561185	plus	4	601047
9606	Homo sapiens	55809	0	live	TRERF1	BCAR2, HSA277276, RAPA, TREP132, TReP-132, dJ139D8.5	transcriptional regulating factor 1	transcriptional-regulating factor 1|breast cancer anti-estrogen resistance 2|rapa-1|rapa-2|transcriptional regulating protein 132|zinc finger protein rapa|zinc finger transcription factor TReP-132	6p21.1	6	NC_000006.12	42224931	42452224	minus	26	610322
9606	Homo sapiens	54915	0	live	YTHDF1	C20orf21	YTH N6-methyladenosine RNA binding protein 1	YTH domain-containing family protein 1|DACA-1|YTH N(6)-methyladenosine RNA binding protein 1|YTH domain family 1|YTH domain family protein 1|YTH domain family, member 1|dermatomyositis associated with cancer putative autoantigen 1	20q13.33	20	NC_000020.11	63195429	63216131	minus	6	616529
9606	Homo sapiens	7864	0	live	SCLC1	SCCL, SCLC	small cell cancer of the lung		3p23-p21	3						182280
9606	Homo sapiens	4153	0	live	MBL2	COLEC1, HSMBPC, MBLD, MBP, MBP-C, MBP1, MBPD, MBL2	mannose binding lectin 2	mannose-binding protein C|collectin-1|mannan-binding lectin|mannose-binding lectin (protein C) 2, soluble (opsonic defect)|mannose-binding lectin 2, soluble (opsonic defect)	10q21.1	10	NC_000010.11	52764977	52772847	minus	5	154545
9606	Homo sapiens	1906	0	live	EDN1	ARCND3, ET1, HDLCQ7, PPET1, QME	endothelin 1	endothelin-1|preproendothelin-1	6p24.1	6	NC_000006.12	12256463	12297194	plus	9	131240
9606	Homo sapiens	5595	0	live	MAPK3	ERK-1, ERK1, ERT2, HS44KDAP, HUMKER1A, P44ERK1, P44MAPK, PRKM3, p44-ERK1, p44-MAPK	mitogen-activated protein kinase 3	mitogen-activated protein kinase 3|MAP kinase isoform p44|MAPK 1|extracellular signal-regulated kinase 1|extracellular signal-related kinase 1|insulin-stimulated MAP2 kinase|microtubule-associated protein 2 kinase	16p11.2	16	NC_000016.10	30114105	30123309	minus	10	601795
9606	Homo sapiens	4879	0	live	NPPB	BNP	natriuretic peptide B	natriuretic peptides B|brain type natriuretic peptide|gamma-brain natriuretic peptide|natriuretic peptide precursor B|natriuretic protein	1p36.22	1	NC_000001.11	11857464	11858945	minus	3	600295
9606	Homo sapiens	729177	0	live	NBAT1	CASC14, NBAT-1	neuroblastoma associated transcript 1	cancer susceptibility candidate 14 (non-protein coding)	6p22.3	6	NC_000006.12	22134602	22147193	minus	3	616206
9606	Homo sapiens	1559	0	live	CYP2C9	CPC9, CYP2C, CYP2C10, CYPIIC9, P450IIC9	cytochrome P450 family 2 subfamily C member 9	cytochrome P450 2C9|cytochrome P-450 S-mephenytoin 4-hydroxylase|cytochrome P-450MP|cytochrome P450 PB-1|cytochrome P450, family 2, subfamily C, polypeptide 9|flavoprotein-linked monooxygenase|microsomal monooxygenase|xenobiotic monooxygenase	10q23.33	10	NC_000010.11	94938658	94990091	plus	9	601130
9606	Homo sapiens	1027	0	live	CDKN1B	CDKN4, KIP1, MEN1B, MEN4, P27KIP1	cyclin dependent kinase inhibitor 1B	cyclin-dependent kinase inhibitor 1B|cyclin-dependent kinase inhibitor 1B (p27, Kip1)	12p13.1	12	NC_000012.12	12717270	12722383	plus	3	600778
9606	Homo sapiens	775	0	live	CACNA1C	CACH2, CACN2, CACNL1A1, CCHL1A1, CaV1.2, LQT8, TS, TS. LQT8	calcium voltage-gated channel subunit alpha1 C	voltage-dependent L-type calcium channel subunit alpha-1C|DHPR, alpha-1 subunit|calcium channel, L type, alpha-1 polypeptide, isoform 1, cardiac muscle|calcium channel, cardic dihydropyridine-sensitive, alpha-1 subunit|calcium channel, voltage-dependent, L type, alpha 1C subunit|voltage-dependent L-type Ca2+ channel alpha 1 subunit|voltage-gated L-type calcium channel Cav1.2 alpha 1 subunit, spli…	12p13.33	12	NC_000012.12	1969552	2697950	plus	56	114205
9606	Homo sapiens	7273	0	live	TTN	CMD1G, CMH9, CMPD4, EOMFC, HMERF, LGMD2J, LGMDR10, MYLK5, SALMY, TMD	titin	titin|connectin|rhabdomyosarcoma antigen MU-RMS-40.14	2q31.2	2	NC_000002.12	178525989	178807423	minus	365	188840
9606	Homo sapiens	4312	0	live	MMP1	CLG, CLGN	matrix metallopeptidase 1	interstitial collagenase|fibroblast collagenase|matrix metallopeptidase 1 (interstitial collagenase)|matrix metalloprotease 1|matrix metalloproteinase 1	11q22.2	11	NC_000011.10	102789919	102798160	minus	10	120353
9606	Homo sapiens	6667	0	live	SP1		Sp1 transcription factor	transcription factor Sp1|specificity protein 1	12q13.13	12	NC_000012.12	53380176	53416446	plus	7	189906
9606	Homo sapiens	55259	0	live	CASC1	LAS1, PPP1R54	cancer susceptibility 1	; protein CASC1|cancer susceptibility candidate 1|cancer susceptibility candidate gene 1 protein|lung adenoma susceptibility 1-like protein|protein phosphatase 1 regulatory subunit 54	12p12.1	12	NC_000012.12	25107057	25195160	minus	19	616906
9606	Homo sapiens	389903	0	live	CSAG3	CSAG3A, CT24.2	CSAG family member 3	chondrosarcoma-associated gene 2/3 protein|CSAG family, member 3A|cancer/testis antigen 24.2|taxol resistance associated gene 3|taxol-resistant-associated gene 3 protein	Xq28	X	NC_000023.11	152753921	152760222	plus	5
9606	Homo sapiens	185	0	live	AGTR1	AG2SB, AT1, AT1AR, AT1B, AT1BR, AT1R, AT2R1, HAT1R, AGTR1	angiotensin II receptor type 1	type-1 angiotensin II receptor|type-1B angiotensin II receptor	3q24	3	NC_000003.12	148697871	148743003	plus	5	106165
9606	Homo sapiens	5879	0	live	RAC1	MIG5, MRD48, Rac-1, TC-25, p21-Rac1	Rac family small GTPase 1	ras-related C3 botulinum toxin substrate 1|cell migration-inducing gene 5 protein|ras-like protein TC25|ras-related C3 botulinum toxin substrate 1 (rho family, small GTP binding protein Rac1)	7p22.1	7	NC_000007.14	6374527	6403967	plus	7	602048
9606	Homo sapiens	3725	0	live	JUN	AP-1, AP1, c-Jun, cJUN, p39	Jun proto-oncogene, AP-1 transcription factor subunit	transcription factor AP-1|Jun activation domain binding protein|activator protein 1|enhancer-binding protein AP1|jun oncogene|proto-oncogene c-Jun|proto-oncogene cJun|v-jun avian sarcoma virus 17 oncogene homolog|v-jun sarcoma virus 17 oncogene homolog	1p32.1	1	NC_000001.11	58780791	58784047	minus	1	165160
9606	Homo sapiens	54576	0	live	UGT1A8	GNT1, UDPGT, UDPGT 1-8, UGT-1A, UGT-1H, UGT1, UGT1-01, UGT1-08, UGT1.1, UGT1.8, UGT1A, UGT1A1S, UGT1H, hUG-BR1, UGT1A8	UDP glucuronosyltransferase family 1 member A8	UDP-glucuronosyltransferase 1-8|Bilirubin-specific UDPGT isozyme 1|UDP glucuronosyltransferase 1 family, polypeptide A8|UDP glycosyltransferase 1 family, polypeptide A8|UDP-glucuronosyltransferase 1 family polypeptide A8s|UDP-glucuronosyltransferase 1-1|UDP-glucuronosyltransferase 1-A|UDP-glucuronosyltransferase 1-H|UDP-glucuronosyltransferase 1A1|UDP-glucuronosyltransferase 1A8|UDPGT 1-1	2q37.1	2	NC_000002.12	233617645	233773299	plus	5	606433
9606	Homo sapiens	8743	0	live	TNFSF10	APO2L, Apo-2L, CD253, TL2, TNLG6A, TRAIL	TNF superfamily member 10	tumor necrosis factor ligand superfamily member 10|Apo-2 ligand|TNF-related apoptosis inducing ligand TRAIL|chemokine tumor necrosis factor ligand superfamily member 10|tumor necrosis factor (ligand) family, member 10|tumor necrosis factor (ligand) superfamily, member 10|tumor necrosis factor apoptosis-inducing ligand splice variant delta|tumor necrosis factor ligand 6A|tumor necrosis factor supe…	3q26.31	3	NC_000003.12	172505508	172523430	minus	6	603598
9606	Homo sapiens	7113	0	live	TMPRSS2	PP9284, PRSS10	transmembrane serine protease 2	transmembrane protease serine 2|epitheliasin|serine protease 10|transmembrane protease, serine 2	21q22.3	21	NC_000021.9	41464305	41508158	minus	15	602060
9606	Homo sapiens	4739	0	live	NEDD9	CAS-L, CAS2, CASL, CASS2, HEF1	neural precursor cell expressed, developmentally down-regulated 9	enhancer of filamentation 1|Cas scaffolding protein family member 2|Crk-associated substrate related protein Cas-L|Enhancer of filamentation 1 p55|cas-like docking|neural precursor cell expressed developmentally down-regulated protein 9|p130Cas-related protein|renal carcinoma antigen NY-REN-12	6p24.2	6	NC_000006.12	11183298	11382348	minus	11	602265
9606	Homo sapiens	5462	0	live	POU5F1B	OCT4-PG1, OCT4PG1, OTF3C, OTF3P1, POU5F1P1, POU5F1P4, POU5FLC20, POU5FLC8	POU class 5 homeobox 1B	putative POU domain, class 5, transcription factor 1B|POU 5 domain protein|POU class 5 homeobox 1 pseudogene 1|POU domain transcription factor OCT4-pg1|POU domain transcription factor Oct-4|POU domain, class 5, transcription factor 1 pseudogene 1|octamer binding protein 3_like sequence	8q24.21	8	NC_000008.11	127415825	127417210	plus	1	615739
9606	Homo sapiens	324	0	live	APC	BTPS2, DP2, DP2.5, DP3, GS, PPP1R46	APC regulator of WNT signaling pathway	adenomatous polyposis coli protein|APC, WNT signaling pathway regulator|WNT signaling pathway regulator|adenomatosis polyposis coli tumor suppressor|adenomatous polyposis coli (APC)|deleted in polyposis 2.5|epididymis secretory sperm binding protein|protein phosphatase 1, regulatory subunit 46|truncated adenomatosis polyposis coli	5q22.2	5	NC_000005.10	112707498	112846239	plus	20	611731
9606	Homo sapiens	5133	0	live	PDCD1	CD279, PD-1, PD1, SLEB2, hPD-1, hPD-l, hSLE1	programmed cell death 1	programmed cell death protein 1|programmed cell death 1 protein|protein PD-1|systemic lupus erythematosus susceptibility 2	2q37.3	2	NC_000002.12	241849881	241858908	minus	6	600244
9606	Homo sapiens	581	0	live	BAX	BCL2L4	BCL2 associated X, apoptosis regulator	apoptosis regulator BAX|BCL2 associated X protein|BCL2-associated X protein omega|Baxdelta2G9|Baxdelta2G9omega|Baxdelta2omega|bcl-2-like protein 4|bcl2-L-4	19q13.33	19	NC_000019.10	48954825	48961798	plus	7	600040
9606	Homo sapiens	4113	0	live	MAGEB2	CT3.2, DAM6, MAGE-XP-2	MAGE family member B2	melanoma-associated antigen B2|DSS/AHC critical interval MAGE superfamily 6|MAGE XP-2 antigen|MAGE-B2 antigen|cancer/testis antigen 3.2|cancer/testis antigen family 3, member 2|melanoma antigen family B, 2|melanoma antigen family B2	Xp21.2	X	NC_000023.11	30215563	30220089	plus	2	300098
9606	Homo sapiens	5426	0	live	POLE	CRCS12, FILS, IMAGEI1, POLE	DNA polymerase epsilon, catalytic subunit	DNA polymerase epsilon catalytic subunit A|DNA polymerase II subunit A|DNA polymerase epsilon catalytic subunit protein|polymerase (DNA directed), epsilon, catalytic subunit|polymerase (DNA) epsilon, catalytic subunit	12q24.33	12	NC_000012.12	132623758	132687519	minus	51	174762
9606	Homo sapiens	3791	0	live	KDR	CD309, FLK1, VEGFR, VEGFR2	kinase insert domain receptor	vascular endothelial growth factor receptor 2|fetal liver kinase-1|kinase insert domain receptor (a type III receptor tyrosine kinase)|protein-tyrosine kinase receptor Flk-1|soluble VEGFR2|tyrosine kinase growth factor receptor	4q12	4	NC_000004.12	55078481	55125595	minus	30	191306
9606	Homo sapiens	3958	0	live	LGALS3	CBP35, GAL3, GALBP, GALIG, L31, LGALS2, MAC2	galectin 3	galectin-3|35 kDa lectin|IgE-binding protein|MAC-2 antigen|advanced glycation end-product receptor 3|carbohydrate-binding protein 35|epididymis secretory sperm binding protein|galactose-specific lectin 3|laminin-binding protein|lectin L-29|lectin, galactoside-binding, soluble, 3	14q22.3	14	NC_000014.9	55129252	55145430	plus	6	153619
9606	Homo sapiens	59277	0	live	NTN4	PRO3091	netrin 4	netrin-4|beta-netrin|hepar-derived netrin-like protein	12q22	12	NC_000012.12	95657807	95791155	minus	12	610401
9606	Homo sapiens	54749	0	live	EPDR1	EPDR, MERP-1, MERP1, UCC1	ependymin related 1	mammalian ependymin-related protein 1|ependymin related protein 1|mammalian ependymin related protein 1|upregulated in colorectal cancer gene 1 protein	7p14.1	7	NC_000007.14	37920561	37951941	plus	4
9606	Homo sapiens	23626	0	live	SPO11	CT35, SPATA43, TOPVIA	SPO11 initiator of meiotic double stranded breaks	meiotic recombination protein SPO11|SPO11 meiotic protein covalently bound to DSB homolog|cancer/testis antigen 35|spermatogenesis associated 43	20q13.31	20	NC_000020.11	57329757	57343993	plus	15	605114
9606	Homo sapiens	84660	0	live	CCDC62	CT109, ERAP75, TSP-NY	coiled-coil domain containing 62	coiled-coil domain-containing protein 62|aaa-protein|cancer/testis antigen 109|coiled-coil domain-containing protein 60|testis-specific protein TSP-NY	12q24.31	12	NC_000012.12	122773621	122827528	plus	15	613481
9606	Homo sapiens	104797537	0	live	GACAT3	LINC01458, lncRNA-AC130710	gastric cancer associated transcript 3	gastric cancer associated transcript 3 (non-protein coding)|long intergenic non-protein coding RNA 1458	2p24.3	2	NC_000002.12	16050427	16085689	plus	4	616132
9606	Homo sapiens	5244	0	live	ABCB4	ABC21, GBD1, ICP3, MDR2, MDR2/3, MDR3, PFIC-3, PGY3	ATP binding cassette subfamily B member 4	phosphatidylcholine translocator ABCB4|ATP-binding cassette sub-family B member 4|ATP-binding cassette, sub-family B (MDR/TAP), member 4|P-glycoprotein 3|P-glycoprotein-3/multiple drug resistance-3|multidrug resistance protein 3|multiple drug resistance 3	7q21.12	7	NC_000007.14	87398988	87476722	minus	31	171060
9606	Homo sapiens	1576	0	live	CYP3A4	CP33, CP34, CYP3A, CYP3A3, CYPIIIA3, CYPIIIA4, HLP, NF-25, P450C3, P450PCN1	cytochrome P450 family 3 subfamily A member 4	cytochrome P450 3A4|1,4-cineole 2-exo-monooxygenase|1,8-cineole 2-exo-monooxygenase|P450-III, steroid inducible|albendazole monooxygenase|albendazole monooxygenase (sulfoxide-forming)|albendazole sulfoxidase|cholesterol 25-hydroxylase|cytochrome P450 3A3|cytochrome P450 HLp|cytochrome P450 NF-25|cytochrome P450, family 3, subfamily A, polypeptide 4|cytochrome P450, subfamily IIIA (niphedipine oxi…	7q22.1	7	NC_000007.14	99756967	99784184	minus	13	124010
9606	Homo sapiens	4000	0	live	LMNA	CDCD1, CDDC, CMD1A, CMT2B1, EMD2, FPL, FPLD, FPLD2, HGPS, IDC, LDP1, LFP, LGMD1B, LMN1, LMNC, LMNL1, MADA, PRO1	lamin A/C	lamin|70 kDa lamin|epididymis secretory sperm binding protein|lamin A/C-like 1|mandibuloacral dysplasia type A|prelamin-A/C|renal carcinoma antigen NY-REN-32	1q22	1	NC_000001.11	156082546	156140089	plus	17	150330
9606	Homo sapiens	54763	0	live	ROPN1	CT91, ODF6, RHPNAP1A, ropporin, ROPN1	rhophilin associated tail protein 1	ropporin-1A|cancer/testis antigen 91|outer dense fiber of sperm tails 6|rhophilin-associated protein 1A|ropporin, rhophilin associated protein 1|testis secretory sperm-binding protein Li 239w	3q21.1	3	NC_000003.12	123968521	123992170	minus	8	611757
9606	Homo sapiens	1813	0	live	DRD2	D2DR, D2R	dopamine receptor D2	D(2) dopamine receptor|dopamine D2 receptor|dopamine receptor D2 isoform|seven transmembrane helix receptor	11q23.2	11	NC_000011.10	113409595	113475398	minus	9	126450
9606	Homo sapiens	51201	0	live	ZDHHC2	DHHC2, ZNF372	zinc finger DHHC-type palmitoyltransferase 2	palmitoyltransferase ZDHHC2|DHHC-2|ream|rec|reduced expression associated with metastasis protein|reduced expression in cancer protein|testis tissue sperm-binding protein Li 56e|zinc finger DHHC domain-containing protein 2|zinc finger DHHC-type containing 2|zinc finger protein 372|zinc finger, DHHC domain containing 2	8p22	8	NC_000008.11	17156000	17230706	plus	17	618621
9606	Homo sapiens	5287	0	live	PIK3C2B	C2-PI3K	phosphatidylinositol-4-phosphate 3-kinase catalytic subunit type 2 beta	phosphatidylinositol 4-phosphate 3-kinase C2 domain-containing subunit beta|PI3K-C2-beta|PI3K-C2beta|PTDINS-3-kinase C2 beta|phosphatidylinositol 3-kinase C2 domain-containing beta polypeptide|phosphoinositide 3-kinase-C2-beta|phosphoinositide-3-kinase, class 2, beta polypeptide|ptdIns-3-kinase C2 subunit beta	1q32.1	1	NC_000001.11	204422630	204494815	minus	36	602838
9606	Homo sapiens	3934	0	live	LCN2	24p3, MSFI, NGAL, p25	lipocalin 2	neutrophil gelatinase-associated lipocalin|25 kDa alpha-2-microglobulin-related subunit of MMP-9|migration-stimulating factor inhibitor|oncogene 24p3|siderocalin LCN2	9q34.11	9	NC_000009.12	128149453	128153453	plus	7	600181
9606	Homo sapiens	100505633	0	live	LINC01133		long intergenic non-protein coding RNA 1133	lncRNA-PAGBC|prognosis-associated gallbladder cancer lncRNA	1q23.2	1	NC_000001.11	159961224	159979086	plus	3
9606	Homo sapiens	79987	0	live	SVEP1	C9orf13, CCP22, POLYDOM, SEL-OB, SELOB	sushi, von Willebrand factor type A, EGF and pentraxin domain containing 1	sushi, von Willebrand factor type A, EGF and pentraxin domain-containing protein 1|CCP module-containing protein 22|selectin-like osteoblast-derived protein|selectin-like protein|serologically defined breast cancer antigen NY-BR-38	9q31.3	9	NC_000009.12	110365248	110579741	minus	48	611691
9606	Homo sapiens	3783	0	live	KCNN4	DHS2, IK, IK1, IKCA1, KCA4, KCa3.1, SK4, hIKCa1, hKCa4, hSK4	potassium calcium-activated channel subfamily N member 4	intermediate conductance calcium-activated potassium channel protein 4|SKCa 4|SKCa4|potassium channel, calcium activated intermediate/small conductance subfamily N alpha, member 4|potassium intermediate/small conductance calcium-activated channel, subfamily N, member 4|putative Gardos channel|putative erythrocyte intermediate conductance calcium-activated potassium Gardos channel|small conductanc…	19q13.31	19	NC_000019.10	43766533	43782139	minus	10	602754
9606	Homo sapiens	1588	0	live	CYP19A1	ARO, ARO1, CPV1, CYAR, CYP19, CYPXIX, P-450AROM	cytochrome P450 family 19 subfamily A member 1	aromatase|cytochrome P-450AROM|cytochrome P450 19A1|cytochrome P450, family 19, subfamily A, polypeptide 1|cytochrome P450, subfamily XIX (aromatization of androgens)|estrogen synthase|estrogen synthetase|flavoprotein-linked monooxygenase|microsomal monooxygenase	15q21.2	15	NC_000015.10	51208057	51338596	minus	18	107910
9606	Homo sapiens	128553	0	live	TSHZ2	C20orf17, OVC10-2, TSH2, ZABC2, ZNF218	teashirt zinc finger homeobox 2	teashirt homolog 2|cell growth-inhibiting protein 7|ovarian cancer-related protein 10-2|serologically defined colon cancer antigen 33 like|teashirt family zinc finger 2|zinc finger protein 218	20q13.2	20	NC_000020.11	52972309	53495330	plus	5	614118
9606	Homo sapiens	54575	0	live	UGT1A10	GNT1, UDPGT, UGT-1A, UGT-1J, UGT1, UGT1-01, UGT1-10, UGT1.1, UGT1.10, UGT1A, UGT1A1, UGT1J, hUG-BR1	UDP glucuronosyltransferase family 1 member A10	UDP-glucuronosyltransferase 1-10|Bilirubin-specific UDPGT isozyme 1|UDP glucuronosyltransferase 1 family, polypeptide A10|UDP glycosyltransferase 1 family, polypeptide A10|UDP-glucuronosyltransferase 1-1|UDP-glucuronosyltransferase 1-A|UDP-glucuronosyltransferase 1-J|UDP-glucuronosyltransferase 1A1|UDP-glucuronosyltransferase 1A10|UDPGT 1-1|UDPGT 1-10	2q37.1	2	NC_000002.12	233636477	233773305	plus	5	606435
9606	Homo sapiens	5937	0	live	RBMS1	C2orf12, HCC-4, MSSP, MSSP-1, MSSP-2, MSSP-3, SCR2, YC1	RNA binding motif single stranded interacting protein 1	RNA-binding motif, single-stranded-interacting protein 1|c-myc gene single strand binding protein 2|cervical cancer oncogene 4|single-stranded DNA-binding protein MSSP-1|suppressor of CDC2 with RNA-binding motif 2|suppressor of cdc 2 (cdc13) with RNA binding motif 2	2q24.2	2	NC_000002.12	160272151	160493983	minus	16	602310
9606	Homo sapiens	5747	0	live	PTK2	FADK, FAK, FAK1, FRNK, PPP1R71, p125FAK, pp125FAK	protein tyrosine kinase 2	focal adhesion kinase 1|FADK 1|FAK-related non-kinase polypeptide|PTK2 protein tyrosine kinase 2|focal adhesion kinase isoform FAK-Del33|focal adhesion kinase-related nonkinase|protein phosphatase 1 regulatory subunit 71	8q24.3	8	NC_000008.11	140657900	141002079	minus	44	600758
9606	Homo sapiens	4282	0	live	MIF	GIF, GLIF, MMIF	macrophage migration inhibitory factor	macrophage migration inhibitory factor|L-dopachrome isomerase|L-dopachrome tautomerase|epididymis secretory sperm binding protein|macrophage migration inhibitory factor (glycosylation-inhibiting factor)|phenylpyruvate tautomerase	22q11.23	22	NC_000022.11	23894383	23895223	plus	3	153620
9606	Homo sapiens	64648	0	live	SPANXD	CT11.3, CT11.4, SPANX-C, SPANX-D, SPANX-E, SPANXC, SPANXE, dJ171K16.1	SPANX family member D	sperm protein associated with the nucleus on the X chromosome D|Cancer/testis antigen 11.3|Cancer/testis-associated protein CTp11|Nuclear-associated protein SPAN-Xc|SPANX family, member E|Sperm protein associated with the nucleus on the X chromosome C|cancer/testis antigen 11.4|cancer/testis antigen family 11, member 4|nuclear-associated protein SPAN-Xd|nuclear-associated protein SPAN-Xe|sperm pr…	Xq27.2	X	NC_000023.11	141697411	141698739	minus	2	300670
9606	Homo sapiens	8313	0	live	AXIN2	AXIL, ODCRCS	axin 2	axin-2|axin-like protein|axis inhibition protein 2|conductin	17q24.1	17	NC_000017.11	65528563	65561648	minus	15	604025
9606	Homo sapiens	4255	0	live	MGMT		O-6-methylguanine-DNA methyltransferase	methylated-DNA--protein-cysteine methyltransferase|6-O-methylguanine-DNA methyltransferase|O-6-methylguanine-DNA-alkyltransferase|O6-methylguanine-DNA methyltransferase|methylguanine-DNA methyltransferase	10q26.3	10	NC_000010.11	129467214	129770983	plus	6	156569
9606	Homo sapiens	3990	0	live	LIPC	HDLCQ12, HL, HTGL, LIPH	lipase C, hepatic type	hepatic triacylglycerol lipase|Triacylglycerol lipase|hepatic lipase|lipase member C|lipase, hepatic	15q21.3	15	NC_000015.10	58410457	58569844	plus	15	151670
9606	Homo sapiens	54658	0	live	UGT1A1	BILIQTL1, GNT1, HUG-BR1, UDPGT, UDPGT 1-1, UGT1, UGT1A	UDP glucuronosyltransferase family 1 member A1	UDP-glucuronosyltransferase 1-1|UDP glucuronosyltransferase 1 family, polypeptide A1|UDP glycosyltransferase 1 family, polypeptide A1|UDP-glucuronosyltransferase 1-A|UDP-glucuronosyltransferase 1A1|UGT-1A|UGT1*1|UGT1-01|UGT1.1|bilirubin UDP-glucuronosyltranserase|bilirubin UDP-glucuronosyltransferase 1-1|bilirubin UDP-glucuronosyltransferase isozyme 1|bilirubin-specific UDPGT isozyme 1	2q37.1	2	NC_000002.12	233760270	233773300	plus	5	191740
9606	Homo sapiens	10283	0	live	CWC27	NY-CO-10, RPSKA, SDCCAG-10, SDCCAG10	CWC27 spliceosome associated cyclophilin	spliceosome-associated protein CWC27 homolog|CWC27 spliceosome associated protein homolog|PPIase CWC27|PPIase SDCCAG10|antigen NY-CO-10|peptidyl-prolyl cis-trans isomerase CWC27 homolog|peptidyl-prolyl cis-trans isomerase SDCCAG10|probable inactive peptidyl-prolyl cis-trans isomerase CWC27 homolog|serologically defined colon cancer antigen 10	5q12.3	5	NC_000005.10	64768918	65018763	plus	19	617170
9606	Homo sapiens	387	0	live	RHOA	ARH12, ARHA, RHO12, RHOH12	ras homolog family member A	transforming protein RhoA|Aplysia ras-related homolog 12|epididymis secretory sperm binding protein|oncogene RHO H12|small GTP binding protein RhoA	3p21.31	3	NC_000003.12	49359145	49411976	minus	7	165390
9606	Homo sapiens	3082	0	live	HGF	DFNB39, F-TCFB, HPTA, SF, HGF	hepatocyte growth factor	hepatocyte growth factor|fibroblast-derived tumor cytotoxic factor|hepatocyte growth factor (hepapoietin A; scatter factor)|hepatopoietin-A|lung fibroblast-derived mitogen	7q21.11	7	NC_000007.14	81699006	81770438	minus	20	142409
9606	Homo sapiens	54920	0	live	DUS2	DUS2L, SMM1, URLC8	dihydrouridine synthase 2	tRNA-dihydrouridine(20) synthase [NAD(P)+]-like|SMM1 homolog|dihydrouridine synthase 2-like, SMM1 homolog|tRNA-dihydrouridine(20) synthase (NAD(P)(+))|up-regulated in lung cancer protein 8	16q22.1	16	NC_000016.10	68023284	68079320	plus	17	609707
9606	Homo sapiens	929	0	live	CD14		CD14 molecule	monocyte differentiation antigen CD14|myeloid cell-specific leucine-rich glycoprotein	5q31.3	5	NC_000005.10	140631728	140633701	minus	3	158120
9606	Homo sapiens	5893	0	live	RAD52		RAD52 homolog, DNA repair protein	DNA repair protein RAD52 homolog|recombination protein RAD52|rhabdomyosarcoma antigen MU-RMS-40.23	12p13.33	12	NC_000012.12	911028	991195	minus	18	600392
9606	Homo sapiens	7490	0	live	WT1	AWT1, GUD, NPHS4, WAGR, WIT-2, WT33	WT1 transcription factor	Wilms tumor protein|Wilms tumor 1	11p13	11	NC_000011.10	32387775	32435539	minus	12	607102
9606	Homo sapiens	121278	0	live	TPH2	ADHD7, NTPH	tryptophan hydroxylase 2	tryptophan 5-hydroxylase 2|neuronal tryptophan hydroxylase|tryptophan 5-monooxygenase 2	12q21.1	12	NC_000012.12	71938845	72032440	plus	13	607478
9606	Homo sapiens	11221	0	live	DUSP10	MKP-5, MKP5	dual specificity phosphatase 10	dual specificity protein phosphatase 10|dual specificity phosphatase MKP-5|map kinase phosphatase 5|mitogen-activated protein kinase phosphatase 5|serine/threonine specific protein phosphatase	1q41	1	NC_000001.11	221701420	221742176	minus	5	608867
9606	Homo sapiens	4982	0	live	TNFRSF11B	OCIF, OPG, PDB5, TR1	TNF receptor superfamily member 11b	tumor necrosis factor receptor superfamily member 11B|osteoclastogenesis inhibitory factor|osteoprotegerin|tumor necrosis factor receptor superfamily, member 11b	8q24.12	8	NC_000008.11	118923557	118951885	minus	5	602643
9606	Homo sapiens	770	0	live	CA11	CA-RP, CA-RP II, CA-XI, CARP-2, CARPX1	carbonic anhydrase 11	carbonic anhydrase-related protein 11|carbonic anhydrase XI|carbonic anhydrase-related protein 2|carbonic anhydrase-related protein XI	19q13.33	19	NC_000019.10	48637946	48646187	minus	6	604644
9606	Homo sapiens	445582	0	live	POTEE	A26C1, A26C1A, CT104.2, POTE-2, POTE2, POTE2gamma	POTE ankyrin domain family member E	POTE ankyrin domain family member E|ANKRD26-like family C member 1A|cancer/testis antigen family 104, member 2|prostate, ovary, testis-expressed protein on chromosome 2|protein expressed in prostate, ovary, testis, and placenta 2	2q21.1	2	NC_000002.12	131209581	131265278	plus	17	608914
9606	Homo sapiens	2033	0	live	EP300	KAT3B, MKHK2, RSTS2, p300	E1A binding protein p300	histone acetyltransferase p300|E1A-associated protein p300|E1A-binding protein, 300kD|histone butyryltransferase p300|histone crotonyltransferase p300|p300 HAT|protein 2-hydroxyisobutyryltransferase p300|protein propionyltransferase p300	22q13.2	22	NC_000022.11	41092592	41180077	plus	31	602700
9606	Homo sapiens	4288	0	live	MKI67	KIA, MIB-, MIB-1, PPP1R105	marker of proliferation Ki-67	proliferation marker protein Ki-67|antigen Ki67|antigen identified by monoclonal antibody Ki-67|proliferation-related Ki-67 antigen|protein phosphatase 1, regulatory subunit 105	10q26.2	10	NC_000010.11	128096659	128126423	minus	16	176741
9606	Homo sapiens	4843	0	live	NOS2	HEP-NOS, INOS, NOSA, NOS2	nitric oxide synthase 2	nitric oxide synthase, inducible|NOS, type II|hepatocyte NOS|inducible NO synthase|inducible NOS|nitric oxide synthase 2, inducible|nitric oxide synthase 2A (inducible, hepatocytes)|nitric oxide synthase, macrophage|peptidyl-cysteine S-nitrosylase NOS2	17q11.2	17	NC_000017.11	27756766	27800529	minus	27	163730
9606	Homo sapiens	389816	0	live	LRRC26	CAPC, bA350O14.10	leucine rich repeat containing 26	leucine-rich repeat-containing protein 26|BK channel auxiliary gamma subunit LRRC26|BK channel auxilliary gamma subunit LRRC26|cytokeratin associated protein|cytokeratin-associated protein in cancer	9q34.3	9	NC_000009.12	137168758	137170039	minus	2	613505
9606	Homo sapiens	4646	0	live	MYO6	DFNA22, DFNB37	myosin VI	unconventional myosin-VI|unconventional myosin-6	6q14.1	6	NC_000006.12	75749203	75919537	plus	40	600970
9606	Homo sapiens	238	0	live	ALK	CD246, NBLST3	ALK receptor tyrosine kinase	ALK tyrosine kinase receptor|CD246 antigen|anaplastic lymphoma receptor tyrosine kinase|mutant anaplastic lymphoma kinase	2p23.2-p23.1	2	NC_000002.12	29190992	29921589	minus	29	105590
9606	Homo sapiens	6495	0	live	SIX1	BOS3, DFNA23, TIP39	SIX homeobox 1	homeobox protein SIX1|sine oculis homeobox homolog 1	14q23.1	14	NC_000014.9	60643421	60649489	minus	2	601205
9606	Homo sapiens	56165	0	live	TDRD1	CT41.1	tudor domain containing 1	tudor domain-containing protein 1|cancer/testis antigen 41.1|testicular tissue protein Li 193	10q25.3	10	NC_000010.11	114174442	114232669	plus	30	605796
9606	Homo sapiens	2247	0	live	FGF2	BFGF, FGF-2, FGFB, HBGF-2	fibroblast growth factor 2	fibroblast growth factor 2|basic fibroblast growth factor bFGF|fibroblast growth factor 2 (basic)|heparin-binding growth factor 2|prostatropin	4q28.1	4	NC_000004.12	122826708	122898236	plus	3	134920
9606	Homo sapiens	3552	0	live	IL1A	IL-1 alpha, IL-1A, IL1, IL1-ALPHA, IL1F1	interleukin 1 alpha	interleukin-1 alpha|hematopoietin-1|preinterleukin 1 alpha|pro-interleukin-1-alpha	2q14.1	2	NC_000002.12	112773925	112784493	minus	8	147760
9606	Homo sapiens	11278	0	live	KLF12	AP-2rep, AP2REP, HSPC122	Kruppel like factor 12	Krueppel-like factor 12|AP-2 repressor|AP-2rep transcription factor|KLF12 zinc finger transcriptional repressor|transcriptional repressor AP-2rep	13q22.1	13	NC_000013.11	73686012	74168295	minus	16	607531
9606	Homo sapiens	8537	0	live	BCAS1	AIBC1, NABC1	breast carcinoma amplified sequence 1	breast carcinoma-amplified sequence 1|amplified and overexpressed in breast cancer|novel amplified in breast cancer 1	20q13.2	20	NC_000020.11	53943538	54070765	minus	14	602968
9606	Homo sapiens	7428	0	live	VHL	HRCA1, RCA11, pVHL, VHL	von Hippel-Lindau tumor suppressor	von Hippel-Lindau disease tumor suppressor|elongin binding protein|protein G7|von Hippel-Lindau tumor suppressor, E3 ubiquitin protein ligase	3p25.3	3	NC_000003.12	10141778	10153667	plus	4	608537
9606	Homo sapiens	3417	0	live	IDH1	HEL-216, HEL-S-26, IDCD, IDH, IDP, IDPC, PICD	isocitrate dehydrogenase (NADP(+)) 1	isocitrate dehydrogenase [NADP] cytoplasmic|NADP(+)-specific ICDH|NADP-dependent isocitrate dehydrogenase, cytosolic|NADP-dependent isocitrate dehydrogenase, peroxisomal|epididymis luminal protein 216|epididymis secretory protein Li 26|epididymis secretory sperm binding protein|isocitrate dehydrogenase (NADP(+)) 1, cytosolic|isocitrate dehydrogenase 1 (NADP+), soluble|oxalosuccinate decarboxylase	2q34	2	NC_000002.12	208236227	208255143	minus	12	147700
9606	Homo sapiens	406904	0	live	MIR1-1	MIRN1-1, hsa-mir-1-1, miRNA1-1, mir-1-1	microRNA 1-1		20q13.33	20	NC_000020.11	62554306	62554376	plus	1	609326
9606	Homo sapiens	118425	0	live	PCAT4	GDEP, PCA4, PCAN1	prostate cancer associated transcript 4	gene differentially expressed in prostate|prostate cancer associated transcript 4 (non-protein coding)|prostate cancer gene 1	4q21.21	4	NC_000004.12	79827471	79863247	plus	2	609717
9606	Homo sapiens	3026	0	live	HABP2	FSAP, HABP, HGFAL, NMTC5, PHBP	hyaluronan binding protein 2	hyaluronan-binding protein 2|factor VII activating protein|factor VII-activating protease|factor seven-activating protease|hepatocyte growth factor activator-like protein|hyaluronic acid binding protein 2|plasma hyaluronan binding protein	10q25.3	10	NC_000010.11	113550831	113589602	plus	14	603924
9606	Homo sapiens	6331	0	live	SCN5A	CDCD2, CMD1E, CMPD2, HB1, HB2, HBBD, HH1, ICCD, IVF, LQT3, Nav1.5, PFHB1, SSS1, VF1	sodium voltage-gated channel alpha subunit 5	sodium channel protein type 5 subunit alpha|cardiac tetrodotoxin-insensitive voltage-dependent sodium channel alpha subunit|sodium channel protein cardiac muscle subunit alpha|sodium channel, voltage-gated, type V, alpha subunit|voltage-gated sodium channel subunit alpha Nav1.5	3p22.2	3	NC_000003.12	38548061	38649687	minus	29	600163
9606	Homo sapiens	6772	0	live	STAT1	CANDF7, IMD31A, IMD31B, IMD31C, ISGF-3, STAT91	signal transducer and activator of transcription 1	signal transducer and activator of transcription 1-alpha/beta|signal transducer and activator of transcription 1, 91kD|signal transducer and activator of transcription 1, 91kDa|transcription factor ISGF-3 components p91/p84	2q32.2	2	NC_000002.12	190968989	191014250	minus	26	600555
9606	Homo sapiens	3757	0	live	KCNH2	ERG-1, ERG1, H-ERG, HERG, HERG1, Kv11.1, LQT2, SQT1	potassium voltage-gated channel subfamily H member 2	potassium voltage-gated channel subfamily H member 2|eag homolog|eag-related protein 1|ether-a-go-go-related gene potassium channel 1|ether-a-go-go-related potassium channel protein|ether-a-go-go-related protein 1|human ether-a-go-go-related|long QT syndrome type 2|potassium channel, voltage gated eag related subfamily H, member 2|potassium voltage-gated channel, subfamily H (eag-related), member…	7q36.1	7	NC_000007.14	150944956	150978321	minus	19	152427
9606	Homo sapiens	6676	0	live	SPAG4	CT127, SUN4	sperm associated antigen 4	sperm-associated antigen 4 protein|SUN domain-containing protein 4|Sad1 and UNC84 domain containing 4|acrosomal protein ACR55|cancer/testis antigen 127|outer dense fiber-associated protein SPAG4|sperm tail protein	20q11.22	20	NC_000020.11	35615829	35621094	plus	13	603038
9606	Homo sapiens	5241	0	live	PGR	NR3C3, PR	progesterone receptor	progesterone receptor|nuclear receptor subfamily 3 group C member 3	11q22.1	11	NC_000011.10	101029624	101130681	minus	10	607311
9606	Homo sapiens	143187	0	live	VTI1A	MMDS3, MVti1, VTI1RP2, Vti1-rp2	vesicle transport through interaction with t-SNAREs 1A	vesicle transport through interaction with t-SNAREs homolog 1A|SNARE Vti1a-beta protein|vesicle transport v-SNARE protein Vti1-like 2	10q25.2	10	NC_000010.11	112446988	112855368	plus	15	614316
9606	Homo sapiens	4204	0	live	MECP2	AUTSX3, MRX16, MRX79, MRXS13, MRXSL, PPMX, RS, RTS, RTT	methyl-CpG binding protein 2	methyl-CpG-binding protein 2|meCp-2 protein	Xq28	X	NC_000023.11	154021573	154097731	minus	10	300005
9606	Homo sapiens	1804	0	live	DPP6	DPL1, DPPX, MRD33, VF2	dipeptidyl peptidase like 6	dipeptidyl aminopeptidase-like protein 6|DPP VI|dipeptidyl aminopeptidase IV-related protein|dipeptidyl peptidase IV-related protein|dipeptidyl peptidase VI|dipeptidyl-peptidase 6	7q36.2	7	NC_000007.14	153748133	154894285	plus	32	126141
9606	Homo sapiens	9965	0	live	FGF19		fibroblast growth factor 19	fibroblast growth factor 19|FGF-19	11q13.3	11	NC_000011.10	69698238	69704022	minus	3	603891
9606	Homo sapiens	3320	0	live	HSP90AA1	EL52, HEL-S-65p, HSP86, HSP89A, HSP90A, HSP90N, HSPC1, HSPCA, HSPCAL1, HSPCAL4, HSPN, Hsp103, Hsp89, Hsp90, LAP-2, LAP2	heat shock protein 90 alpha family class A member 1	heat shock protein HSP 90-alpha|HSP 86|LPS-associated protein 2|epididymis luminal secretory protein 52|epididymis secretory sperm binding protein Li 65p|heat shock 86 kDa|heat shock 90kD protein 1, alpha|heat shock 90kD protein 1, alpha-like 4|heat shock 90kD protein, alpha-like 4|heat shock 90kDa protein 1, alpha|heat shock protein 90kDa alpha (cytosolic), class A member 1|heat shock protein 90…	14q32.31	14	NC_000014.9	102080742	102139749	minus	13	140571
9606	Homo sapiens	132299	0	live	OCIAD2		OCIA domain containing 2	OCIA domain-containing protein 2|ovarian cancer immunoreactive antigen domain containing 2|ovarian carcinoma immunoreactive antigen-like protein	4p11	4	NC_000004.12	48885019	48906828	minus	7
9606	Homo sapiens	5599	0	live	MAPK8	JNK, JNK-46, JNK1, JNK1A2, JNK21B1/2, PRKM8, SAPK1, SAPK1c	mitogen-activated protein kinase 8	mitogen-activated protein kinase 8|JUN N-terminal kinase|MAP kinase 8|c-Jun N-terminal kinase 1|mitogen-activated protein kinase 8 isoform JNK1 alpha1|mitogen-activated protein kinase 8 isoform JNK1 beta2|stress-activated protein kinase 1|stress-activated protein kinase 1c	10q11.22	10	NC_000010.11	48306639	48439360	plus	16	601158
9606	Homo sapiens	4869	0	live	NPM1	B23, NPM	nucleophosmin 1	nucleophosmin|nucleolar protein NO38|nucleophosmin (nucleolar phosphoprotein B23, numatrin)|nucleophosmin/nucleoplasmin family, member 1|testicular tissue protein Li 128	5q35.1	5	NC_000005.10	171387116	171410884	plus	13	164040
9606	Homo sapiens	406938	0	live	MIR146A	MIRN146, MIRN146A, miR-146a, miRNA146A	microRNA 146a	hsa-mir-146|hsa-mir-146a	5q33.3	5	NC_000005.10	160485352	160485450	plus	1	610566
9606	Homo sapiens	7179	0	live	TPTE	CT44, PTEN2	transmembrane phosphatase with tensin homology	putative tyrosine-protein phosphatase TPTE|PTEN-related tyrosine phosphatase|cancer/testis antigen 44|tensin, putative protein-tyrosine phosphatase|tumor antigen BJ-HCC-5	21p11.2	21	NC_000021.9	10521514	10606270	plus	24	604336
9606	Homo sapiens	56888	0	live	KCMF1	DEBT91, FIGC, PCMF, ZZZ1	potassium channel modulatory factor 1	E3 ubiquitin-protein ligase KCMF1|FGF-induced in gastric cancer|FGF-induced ubiquitin-protein ligase in gastric cancers|RING-type E3 ubiquitin transferase KCMF1|ZZ-type zinc finger-containing protein 1|differentially expressed in branching tubulogenesis 91|zinc finger, ZZ domain containing 1	2p11.2	2	NC_000002.12	84971161	85059472	plus	9	614719
9606	Homo sapiens	6241	0	live	RRM2	C2orf48, R2, RR2, RR2M	ribonucleotide reductase regulatory subunit M2	ribonucleoside-diphosphate reductase subunit M2|ribonucleotide reductase M2 polypeptide|ribonucleotide reductase small chain|ribonucleotide reductase small subunit|uncharacterized protein C2orf48	2p25.1	2	NC_000002.12	10122568	10211010	plus	14	180390
9606	Homo sapiens	5265	0	live	SERPINA1	A1A, A1AT, AAT, PI, PI1, PRO2275, alpha1AT, nNIF	serpin family A member 1	alpha-1-antitrypsin|alpha-1 antitrypsin|alpha-1 protease inhibitor|alpha-1-antiproteinase|alpha-1-antitrypsin null|alpha-1-antitrypsin short transcript variant 1C4|alpha-1-antitrypsin short transcript variant 1C5|epididymis secretory sperm binding protein|protease inhibitor 1 (anti-elastase), alpha-1-antitrypsin|serine (or cysteine) proteinase inhibitor, clade A, member 1|serpin A1|serpin peptida…	14q32.13	14	NC_000014.9	94376747	94390654	minus	7	107400
9606	Homo sapiens	84803	0	live	GPAT3	AGPAT 10, AGPAT10, AGPAT8, AGPAT9, HMFN0839, LPAAT-theta, MAG1	glycerol-3-phosphate acyltransferase 3	glycerol-3-phosphate acyltransferase 3|1-AGP acyltransferase 9|1-AGPAT 9|1-acyl-sn-glycerol-3-phosphate O-acyltransferase 10|1-acyl-sn-glycerol-3-phosphate O-acyltransferase 9|1-acylglycerol-3-phosphate O-acyltransferase 8|1-acylglycerol-3-phosphate O-acyltransferase 9|GPAT-3|MAG-1|acyl-CoA:glycerol-3-phosphate acyltransferase 3|endoplasmic reticulum associated GPAT|hGPAT3|lung cancer metastasis-…	4q21.23	4	NC_000004.12	83535634	83605875	plus	16	610958
9606	Homo sapiens	2335	0	live	FN1	CIG, ED-B, FINC, FN, FNZ, GFND, GFND2, LETS, MSF, SMDCF	fibronectin 1	fibronectin|cold-insoluble globulin|epididymis secretory sperm binding protein|migration-stimulating factor	2q35	2	NC_000002.12	215360440	215436167	minus	46	135600
9606	Homo sapiens	3708	0	live	ITPR1	ACV, CLA4, INSP3R1, IP3R, IP3R1, PPP1R94, SCA15, SCA16, SCA29	inositol 1,4,5-trisphosphate receptor type 1	inositol 1,4,5-trisphosphate receptor type 1|IP3 receptor|IP3R 1|inositol 1,4,5-triphosphate receptor, type 1|protein phosphatase 1, regulatory subunit 94|type 1 InsP3 receptor|type 1 inositol 1,4,5-trisphosphate receptor	3p26.1	3	NC_000003.12	4493348	4847840	plus	63	147265
9606	Homo sapiens	5578	0	live	PRKCA	AAG6, PKC-alpha, PKCA, PKCI+/-, PKCalpha, PRKACA	protein kinase C alpha	protein kinase C alpha type|PKC-A|aging-associated gene 6	17q24.2	17	NC_000017.11	66302613	66810743	plus	24	176960
9606	Homo sapiens	3558	0	live	IL2	IL-2, TCGF, lymphokine	interleukin 2	interleukin-2|T cell growth factor|aldesleukin|involved in regulation of T-cell clonal expansion	4q27	4	NC_000004.12	122449479	122456725	minus	5	147680
9606	Homo sapiens	54106	0	live	TLR9	CD289	toll like receptor 9	toll-like receptor 9	3p21.2	3	NC_000003.12	52221080	52226163	minus	2	605474
9606	Homo sapiens	25	0	live	ABL1	ABL, BCR-ABL, CHDSKM, JTK7, bcr/abl, c-ABL, c-ABL1, p150, v-abl	ABL proto-oncogene 1, non-receptor tyrosine kinase	tyrosine-protein kinase ABL1|ABL protooncogene 1 nonreceptor tyrosine kinase|Abelson tyrosine-protein kinase 1|bcr/c-abl oncogene protein|c-abl oncogene 1, receptor tyrosine kinase|proto-oncogene c-Abl|proto-oncogene tyrosine-protein kinase ABL1|truncated ABL protooncogene 1 nonreceptor tyrosine kinase|tyrosine-protein kinase|v-abl Abelson murine leukemia viral oncogene homolog 1	9q34.12	9	NC_000009.12	130713881	130887675	plus	12	189980
9606	Homo sapiens	114548	0	live	NLRP3	AGTAVPRL, AII, AVP, C1orf7, CIAS1, CLR1.1, DFNA34, FCAS, FCAS1, FCU, KEFH, MWS, NALP3, PYPAF1	NLR family pyrin domain containing 3	NACHT, LRR and PYD domains-containing protein 3|NACHT domain-, leucine-rich repeat-, and PYD-containing protein 3|NACHT, LRR and PYD containing protein 3|PYRIN-containing APAF1-like protein 1|caterpiller protein 1.1|cold autoinflammatory syndrome 1 protein|cold-induced autoinflammatory syndrome 1 protein|cryopyrin|cryopyrin, NACHT, LRR and PYD domains - containing protein 3|deafness, autosomal do…	1q44	1	NC_000001.11	247416156	247449108	plus	10	606416
9606	Homo sapiens	64949	0	live	MRPS26	C20orf193, GI008, MRP-S13, MRP-S26, MRPS13, NY-BR-87, RPMS13, dJ534B8.3	mitochondrial ribosomal protein S26	28S ribosomal protein S26, mitochondrial|28S ribosomal protein S13, mitochondrial|S13mt|S26mt|mitochondrial small ribosomal subunit protein mS26|serologically defined breast cancer antigen NY-BR-87	20p13	20	NC_000020.11	3046052	3048250	plus	4	611988
9606	Homo sapiens	374393	0	live	FAM111B	CANP, POIKTMP	family with sequence similarity 111 member B	protein FAM111B|cancer-associated nucleoprotein	11q12.1	11	NC_000011.10	59107185	59127415	plus	4	615584
9606	Homo sapiens	401022	0	live	HAGLR	HOXD-AS1, MIR7704HG, Mdgt	HOXD antisense growth-associated long non-coding RNA	HOXD cluster antisense RNA 1 (non-protein coding)|MIR7704 host	2q31.1	2	NC_000002.12	176173189	176188958	minus	7	618209
9606	Homo sapiens	2152	0	live	F3	CD142, TF, TFA	coagulation factor III, tissue factor	tissue factor|coagulation factor III (thromboplastin, tissue factor)	1p21.3	1	NC_000001.11	94529173	94541857	minus	6	134390
9606	Homo sapiens	7718	0	live	ZNF165	CT53, LD65, ZSCAN7	zinc finger protein 165	zinc finger protein 165|cancer/testis antigen 53|zinc finger and SCAN domain-containing protein 7	6p22.1	6	NC_000006.12	28080282	28104244	plus	6	600834
9606	Homo sapiens	5781	0	live	PTPN11	BPTP3, CFC, JMML, METCDS, NS1, PTP-1D, PTP2C, SH-PTP2, SH-PTP3, SHP2	protein tyrosine phosphatase non-receptor type 11	tyrosine-protein phosphatase non-receptor type 11|protein-tyrosine phosphatase 1D|protein-tyrosine phosphatase 2C	12q24.13	12	NC_000012.12	112418915	112509918	plus	16	176876
9606	Homo sapiens	1950	0	live	EGF	HOMG4, URG	epidermal growth factor	pro-epidermal growth factor|beta-urogastrone	4q25	4	NC_000004.12	109912883	110013766	plus	26	131530
9606	Homo sapiens	153129	0	live	SLC38A9	URLC11	solute carrier family 38 member 9	sodium-coupled neutral amino acid transporter 9|putative sodium-coupled neutral amino acid transporter 9|up-regulated in lung cancer 11	5q11.2	5	NC_000005.10	55625845	55712343	minus	21	616203
9606	Homo sapiens	2321	0	live	FLT1	FLT, FLT-1, VEGFR-1, VEGFR1	fms related receptor tyrosine kinase 1	vascular endothelial growth factor receptor 1|fms related tyrosine kinase 1|fms-like tyrosine kinase 1|fms-related tyrosine kinase 1 (vascular endothelial growth factor/vascular permeability factor receptor)|tyrosine-protein kinase FRT|tyrosine-protein kinase receptor FLT|vascular permeability factor receptor	13q12.3	13	NC_000013.11	28300346	28495128	minus	33	165070
9606	Homo sapiens	27120	0	live	DKKL1	CT34, SGY, SGY-1, SGY1	dickkopf like acrosomal protein 1	dickkopf-like protein 1|cancer/testis antigen 34|dickkopf-like 1|protein soggy-1|soggy|soggy-1|testicular secretory protein Li 15	19q13.33	19	NC_000019.10	49360520	49375132	plus	10	605418
9606	Homo sapiens	4353	0	live	MPO		myeloperoxidase	myeloperoxidase	17q22	17	NC_000017.11	58269855	58280935	minus	12	606989
9606	Homo sapiens	90737	0	live	PAGE5	CT16, CT16.1, CT16.2, GAGEE1, PAGE-5	PAGE family member 5	P antigen family member 5|P antigen family, member 5 (prostate associated)|cancer/testis antigen 16.1|cancer/testis antigen family 16, member 1|cancer/testis antigen family 16, member 2|g antigen family E member 1|prostate-associated gene 5 protein	Xp11.21	X	NC_000023.11	55220346	55224108	plus	5	301009
9606	Homo sapiens	4314	0	live	MMP3	CHDS6, MMP-3, SL-1, STMY, STMY1, STR1	matrix metallopeptidase 3	stromelysin-1|matrix metalloproteinase 3 (stromelysin 1, progelatinase)|proteoglycanase|transin-1	11q22.2	11	NC_000011.10	102835801	102843609	minus	10	185250
9606	Homo sapiens	861	0	live	RUNX1	AML1, AML1-EVI-1, AMLCR1, CBF2alpha, CBFA2, EVI-1, PEBP2aB, PEBP2alpha	RUNX family transcription factor 1	runt-related transcription factor 1|AML1-EVI-1 fusion protein|PEA2-alpha B|PEBP2-alpha B|SL3-3 enhancer factor 1 alpha B subunit|SL3/AKV core-binding factor alpha B subunit|acute myeloid leukemia 1 protein|core-binding factor, runt domain, alpha subunit 2|oncogene AML-1|polyomavirus enhancer-binding protein 2 alpha B subunit|runt related transcription factor 1	21q22.12	21	NC_000021.9	34787801	35049334	minus	13	151385
9606	Homo sapiens	1601	0	live	DAB2	DOC-2, DOC2	DAB adaptor protein 2	disabled homolog 2|DAB2, clathrin adaptor protein|Dab, mitogen-responsive phosphoprotein, homolog 2|adaptor molecule disabled-2|differentially expressed in ovarian carcinoma 2|differentially-expressed protein 2|disabled homolog 2, mitogen-responsive phosphoprotein	5p13.1	5	NC_000005.10	39371674	39425233	minus	15	601236
9606	Homo sapiens	54331	0	live	GNG2		G protein subunit gamma 2	guanine nucleotide-binding protein G(I)/G(S)/G(O) subunit gamma-2|g gamma-I|guanine nucleotide binding protein (G protein), gamma 2|guanine nucleotide binding protein gamma 2|guanine nucleotide-binding protein G(I)/G(O) gamma-2 subunit	14q22.1	14	NC_000014.9	51847131	51969800	plus	10	606981
9606	Homo sapiens	4718	0	live	NDUFC2	B14.5b, CI-B14.5b, HLC-1, NADHDH2	NADH:ubiquinone oxidoreductase subunit C2	NADH dehydrogenase [ubiquinone] 1 subunit C2|NADH dehydrogenase (ubiquinone) 1, subcomplex unknown, 2, 14.5kDa|NADH-ubiquinone oxidoreductase subunit B14.5b|complex I subunit B14.5b|complex I-B14.5b|human lung cancer oncogene 1 protein	11q14.1	11	NC_000011.10	78068297	78079862	minus	3	603845
9606	Homo sapiens	1577	0	live	CYP3A5	CP35, CYPIIIA5, P450PCN3, PCN3	cytochrome P450 family 3 subfamily A member 5	cytochrome P450 3A5|aryl hydrocarbon hydroxylase|cytochrome P450 HLp2|cytochrome P450, family 3, subfamily A, polypeptide 5|cytochrome P450, subfamily IIIA (niphedipine oxidase), polypeptide 5|cytochrome P450-PCN3|flavoprotein-linked monooxygenase|microsomal monooxygenase|xenobiotic monooxygenase	7q22.1	7	NC_000007.14	99648194	99679996	minus	14	605325
9606	Homo sapiens	3065	0	live	HDAC1	GON-10, HD1, KDAC1, RPD3, RPD3L1	histone deacetylase 1	histone deacetylase 1|reduced potassium dependency, yeast homolog-like 1	1p35.2-p35.1	1	NC_000001.11	32292083	32333628	plus	14	601241
9606	Homo sapiens	2067	0	live	ERCC1	COFS4, RAD10, UV20	ERCC excision repair 1, endonuclease non-catalytic subunit	DNA excision repair protein ERCC-1|excision repair cross-complementation group 1|excision repair cross-complementing rodent repair deficiency, complementation group 1 (includes overlapping antisense sequence)	19q13.32	19	NC_000019.10	45407334	45451547	minus	13	126380
9606	Homo sapiens	19	0	live	ABCA1	ABC-1, ABC1, CERP, HDLCQTL13, HDLDT1, HPALP1, TGD	ATP binding cassette subfamily A member 1	phospholipid-transporting ATPase ABCA1|ATP-binding cassette sub-family A member 1|ATP-binding cassette transporter A1|ATP-binding cassette, sub-family A (ABC1), member 1|cholesterol efflux regulatory protein|membrane-bound	9q31.1	9	NC_000009.12	104781006	104928232	minus	58	600046
9606	Homo sapiens	10194	0	live	TSHZ1	CAA, NY-CO-33, SDCCAG33, TSH1	teashirt zinc finger homeobox 1	teashirt homolog 1|antigen NY-CO-33|serologically defined colon cancer antigen 33	18q22.3	18	NC_000018.10	75210797	75289950	plus	4	614427
9606	Homo sapiens	125972	0	live	CALR3	CMH19, CRT2, CT93	calreticulin 3	calreticulin-3|calreticulin-2|calsperin|cancer/testis antigen 93|testis secretory sperm-binding protein Li 226n	19p13.11	19	NC_000019.10	16479061	16496167	minus	9	611414
9606	Homo sapiens	54457	0	live	TAF7L	CT40, TAF2Q	TATA-box binding protein associated factor 7 like	transcription initiation factor TFIID subunit 7-like|RNA polymerase II TBP-associated factor subunit Q|TAF7-like RNA polymerase II, TATA box binding protein (TBP)-associated factor, 50kDa|TATA box-binding protein-associated factor 50 kDa|TBP-associated factor, RNA polymerase II, Q|cancer/testis antigen 40|transcription initiation factor TFIID 50 kDa subunit	Xq22.1	X	NC_000023.11	101268257	101293083	minus	14	300314
9606	Homo sapiens	1471	0	live	CST3	ARMD11, HEL-S-2	cystatin C	cystatin-C|bA218C14.4 (cystatin C)|cystatin 3|epididymis secretory protein Li 2|gamma-trace|neuroendocrine basic polypeptide|post-gamma-globulin	20p11.21	20	NC_000020.11	23626706	23637955	minus	4	604312
9606	Homo sapiens	2697	0	live	GJA1	AVSD3, CMDR, CX43, EKVP, EKVP3, GJAL, HLHS1, HSS, ODDD, PPKCA	gap junction protein alpha 1	gap junction alpha-1 protein|connexin-43|gap junction 43 kDa heart protein|gap junction protein, alpha 1, 43kDa	6q22.31	6	NC_000006.12	121435646	121449727	plus	2	121014
9606	Homo sapiens	6790	0	live	AURKA	AIK, ARK1, AURA, BTAK, PPP1R47, STK15, STK6, STK7	aurora kinase A	aurora kinase A|aurora 2|aurora/IPL1-like kinase|aurora/IPL1-related kinase 1|breast tumor-amplified kinase|protein phosphatase 1, regulatory subunit 47|serine/threonine protein kinase 15|serine/threonine-protein kinase 6|serine/threonine-protein kinase aurora-A	20q13.2	20	NC_000020.11	56369389	56392337	minus	12	603072
9606	Homo sapiens	5753	0	live	PTK6	BRK	protein tyrosine kinase 6	protein-tyrosine kinase 6|PTK6 protein tyrosine kinase 6|breast tumor kinase|protein-tyrosine kinase BRK|tyrosine-protein kinase BRK	20q13.33	20	NC_000020.11	63528001	63537376	minus	8	602004
9606	Homo sapiens	51105	0	live	PHF20L1	CGI-72, TDRD20B, URLC1	PHD finger protein 20 like 1	PHD finger protein 20-like protein 1|tudor domain containing 20B|tudor domain-containing protein PHF20L1|up-regulated in lung cancer 1	8q24.22	8	NC_000008.11	132775358	132848807	plus	22
9606	Homo sapiens	406947	0	live	MIR155	MIRN155, miRNA155, mir-155	microRNA 155	hsa-mir-155	21q21.3	21	NC_000021.9	25573980	25574044	plus	1	609337
9606	Homo sapiens	3486	0	live	IGFBP3	BP-53, IBP3	insulin like growth factor binding protein 3	insulin-like growth factor-binding protein 3|IBP-3|IGF-binding protein 3|IGFBP-3|acid stable subunit of the 140 K IGF complex|binding protein 29|binding protein 53|growth hormone-dependent binding protein	7p12.3	7	NC_000007.14	45912245	45921272	minus	5	146732
9606	Homo sapiens	219938	0	live	SPATA19	CT132, SPAS1, spergen1	spermatogenesis associated 19	spermatogenesis-associated protein 19, mitochondrial|cancer/testis antigen 132|spergen-1|spermatogenic cell-specific gene 1 protein|spermatogenic specific-gene1|testis secretory sperm-binding protein Li 243mP	11q25	11	NC_000011.10	133835930	133845533	minus	8	609805
9606	Homo sapiens	6352	0	live	CCL5	D17S136E, RANTES, SCYA5, SIS-delta, SISd, TCP228, eoCP	C-C motif chemokine ligand 5	C-C motif chemokine 5|T-cell specific protein p288|beta-chemokine RANTES|chemokine (C-C motif) ligand 5|eosinophil chemotactic cytokine|regulated upon activation, normally T-expressed, and presumably secreted|small inducible cytokine subfamily A (Cys-Cys), member 5	17q12	17	NC_000017.11	35871491	35880360	minus	4	187011
9606	Homo sapiens	2114	0	live	ETS2	ETS2IT1	ETS proto-oncogene 2, transcription factor	protein C-ets-2|oncogene ETS-2|v-ets avian erythroblastosis virus E2 oncogene homolog 2|v-ets avian erythroblastosis virus E26 oncogene homolog 2|v-ets erythroblastosis virus E26 oncogene homolog 2	21q22.2	21	NC_000021.9	38805183	38824955	plus	13	164740
9606	Homo sapiens	3953	0	live	LEPR	CD295, LEP-RD, OB-R, OBR, LEPR	leptin receptor	leptin receptor|OB receptor|huB219	1p31.3	1	NC_000001.11	65420652	65641559	plus	24	601007
9606	Homo sapiens	3643	0	live	INSR	CD220, HHF5	insulin receptor	insulin receptor|IR	19p13.2	19	NC_000019.10	7112257	7294414	minus	22	147670
9606	Homo sapiens	56729	0	live	RETN	ADSF, FIZZ31, RSTN, XCP1, RETN	resistin	resistin|C/EBP-epsilon regulated myeloid-specific secreted cysteine-rich protein precursor 1|adipose tissue-specific secretory factor|c/EBP-epsilon-regulated myeloid-specific secreted cysteine-rich protein|cysteine-rich secreted protein A12-alpha-like 2|cysteine-rich secreted protein FIZZ3|found in inflammatory zone 3|resistin delta2	19p13.2	19	NC_000019.10	7669049	7670455	plus	4	605565
9606	Homo sapiens	1869	0	live	E2F1	E2F-1, RBAP1, RBBP3, RBP3	E2F transcription factor 1	transcription factor E2F1|PBR3|PRB-binding protein E2F-1|RBAP-1|RBBP-3|retinoblastoma-associated protein 1|retinoblastoma-binding protein 3	20q11.22	20	NC_000020.11	33675477	33686385	minus	7	189971
9606	Homo sapiens	4988	0	live	OPRM1	LMOR, M-OR-1, MOP, MOR, MOR1, OPRM	opioid receptor mu 1	mu-type opioid receptor|mu opiate receptor|mu opioid receptor hMOR-1a	6q25.2	6	NC_000006.12	154010496	154246867	plus	17	600018
9606	Homo sapiens	10891	0	live	PPARGC1A	LEM6, PGC-1(alpha), PGC-1alpha, PGC-1v, PGC1, PGC1A, PPARGC1	PPARG coactivator 1 alpha	peroxisome proliferator-activated receptor gamma coactivator 1-alpha|L-PGC-1alpha|PGC-1-alpha|PPAR gamma coactivator variant form|PPARGC-1-alpha|PPARgamma coactivator 1alpha|ligand effect modulator-6|peroxisome proliferator-activated receptor gamma coactivator 1 alpha transcript variant B4-3ext|peroxisome proliferator-activated receptor gamma coactivator 1 alpha transcript variant B4-8a|peroxisom…	4p15.2	4	NC_000004.12	23792021	24472905	minus	24	604517
9606	Homo sapiens	3161	0	live	HMMR	CD168, IHABP, RHAMM	hyaluronan mediated motility receptor	hyaluronan mediated motility receptor|intracellular hyaluronic acid-binding protein|receptor for hyaluronan-mediated motility	5q34	5	NC_000005.10	163460632	163491941	plus	18	600936
9606	Homo sapiens	4319	0	live	MMP10	SL-2, STMY2	matrix metallopeptidase 10	stromelysin-2|MMP-10|matrix metalloprotease 10|matrix metalloproteinase 10 (stromelysin 2)|matrix metalloproteinase-10|transin 2	11q22.2	11	NC_000011.10	102770502	102780628	minus	10	185260
9606	Homo sapiens	4968	0	live	OGG1	HMMH, HOGG1, MUTM, OGH1	8-oxoguanine DNA glycosylase	N-glycosylase/DNA lyase|8-hydroxyguanine DNA glycosylase|AP lyase|DNA-apurinic or apyrimidinic site lyase|OGG1 type 1f	3p25.3	3	NC_000003.12	9749944	9788246	plus	11	601982
9606	Homo sapiens	6513	0	live	SLC2A1	CSE, DYT17, DYT18, DYT9, EIG12, GLUT, GLUT-1, GLUT1, GLUT1DS, HTLVR, PED, SDCHCN	solute carrier family 2 member 1	solute carrier family 2, facilitated glucose transporter member 1|choreoathetosis/spasticity, episodic (paroxysmal choreoathetosis/spasticity)|glucose transporter type 1, erythrocyte/brain|hepG2 glucose transporter|human T-cell leukemia virus (I and II) receptor|receptor for HTLV-1 and HTLV-2|solute carrier family 2 (facilitated glucose transporter), member 1	1p34.2	1	NC_000001.11	42925375	42958868	minus	10	138140
9606	Homo sapiens	29919	0	live	RMC1	C18orf8, HsT2591, MIC1, Mic-1, WDR98	regulator of MON1-CCZ1	regulator of MON1-CCZ1 complex|WD repeat domain 98|WD repeat-containing protein 98|colon cancer-associated protein Mic1|macrophage inhibitory cytokine 1|uncharacterized protein C18orf8	18q11.2	18	NC_000018.10	23503470	23531822	plus	20
9606	Homo sapiens	5424	0	live	POLD1	CDC2, CRCS10, MDPL, POLD	DNA polymerase delta 1, catalytic subunit	DNA polymerase delta catalytic subunit|CDC2 homolog|DNA polymerase subunit delta p125|polymerase (DNA directed), delta 1, catalytic subunit 125kDa|polymerase (DNA) delta 1, catalytic subunit	19q13.33	19	NC_000019.10	50384291	50418018	plus	30	174761
9606	Homo sapiens	8842	0	live	PROM1	AC133, CD133, CORD12, MCDR2, MSTP061, PROML1, RP41, STGD4	prominin 1	prominin-1|antigen AC133|hProminin|hematopoietic stem cell antigen|prominin-like protein 1	4p15.32	4	NC_000004.12	15968226	16084059	minus	35	604365
9606	Homo sapiens	5347	0	live	PLK1	PLK, STPK13	polo like kinase 1	serine/threonine-protein kinase PLK1|PLK-1|cell cycle regulated protein kinase|polo (Drosophia)-like kinase|serine/threonine-protein kinase 13	16p12.2	16	NC_000016.10	23678889	23690367	plus	10	602098
9606	Homo sapiens	65991	0	live	FUNDC2	DC44, HCBP6, HCC3, PD03104	FUN14 domain containing 2	FUN14 domain-containing protein 2|HCC-3|cervical cancer oncogene 3|cervical cancer proto-oncogene 3 protein|hepatitis C virus core-binding protein 6	Xq28	X	NC_000023.11	155026844	155060304	plus	5
9606	Homo sapiens	10214	0	live	SSX3	CT5.3	SSX family member 3	protein SSX3|Kruppel-associated box containing gene product SSX3|cancer/testis antigen 5.3|synovial sarcoma, X breakpoint 3	Xp11.23	X	NC_000023.11	48346427	48356706	minus	9	300325
9606	Homo sapiens	3309	0	live	HSPA5	BIP, GRP78, HEL-S-89n, MIF2	heat shock protein family A (Hsp70) member 5	endoplasmic reticulum chaperone BiP|78 kDa glucose-regulated protein|HSP70 family protein 5|binding-immunoglobulin protein|endoplasmic reticulum lumenal Ca(2+)-binding protein grp78|epididymis secretory sperm binding protein Li 89n|glucose-regulated protein, 78kDa|heat shock 70kDa protein 5 (glucose-regulated protein, 78kDa)|heat shock protein 70 family protein 5|heat shock protein family A membe…	9q33.3	9	NC_000009.12	125234853	125241343	minus	8	138120
9606	Homo sapiens	3672	0	live	ITGA1	CD49a, VLA1	integrin subunit alpha 1	integrin alpha-1|CD49 antigen-like family member A|VLA-1|laminin and collagen receptor|very late activation protein 1	5q11.2	5	NC_000005.10	52787916	52959209	plus	29	192968
9606	Homo sapiens	4170	0	live	MCL1	BCL2L3, EAT-ES, MCL1L, MCL1S, Mcl-1, TM, bcl2-L-3, mcl1/EAT, MCL1	MCL1 apoptosis regulator, BCL2 family member	induced myeloid leukemia cell differentiation protein Mcl-1|BCL2 family apoptosis regulator|MCL1, BCL2 family apoptosis regulator|bcl-2-like protein 3|bcl-2-related protein EAT/mcl1|myeloid cell leukemia 1|myeloid cell leukemia ES|myeloid cell leukemia sequence 1 (BCL2-related)	1q21.2	1	NC_000001.11	150574551	150579738	minus	4	159552
9606	Homo sapiens	4089	0	live	SMAD4	DPC4, JIP, MADH4, MYHRS	SMAD family member 4	mothers against decapentaplegic homolog 4|MAD homolog 4|SMAD, mothers against DPP homolog 4|deleted in pancreatic carcinoma locus 4|deletion target in pancreatic carcinoma 4|mothers against decapentaplegic, Drosophila, homolog of, 4	18q21.2	18	NC_000018.10	51030213	51085042	plus	12	600993
9606	Homo sapiens	3627	0	live	CXCL10	C7, IFI10, INP10, IP-10, SCYB10, crg-2, gIP-10, mob-1	C-X-C motif chemokine ligand 10	C-X-C motif chemokine 10|10 kDa interferon gamma-induced protein|chemokine (C-X-C motif) ligand 10|gamma IP10|interferon-inducible cytokine IP-10|protein 10 from interferon (gamma)-induced cell line|small inducible cytokine subfamily B (Cys-X-Cys), member 10|small-inducible cytokine B10	4q21.1	4	NC_000004.12	76021118	76023497	minus	4	147310
9606	Homo sapiens	7161	0	live	TP73	P73	tumor protein p73	tumor protein p73|p53-like transcription factor|p53-related protein	1p36.32	1	NC_000001.11	3652516	3736201	plus	16	601990
9606	Homo sapiens	80000	0	live	GREB1L	C18orf6, KIAA1772, RHDA3	GREB1 like retinoic acid receptor coactivator	GREB1-like protein|growth regulation by estrogen in breast cancer 1 like|growth regulation by estrogen in breast cancer 1-like protein|growth regulation by estrogen in breast cancer-like	18q11.1-q11.2	18	NC_000018.10	21242225	21528503	plus	34	617782
9606	Homo sapiens	8600	0	live	TNFSF11	CD254, ODF, OPGL, OPTB2, RANKL, TNLG6B, TRANCE, hRANKL2, sOdf	TNF superfamily member 11	tumor necrosis factor ligand superfamily member 11|TNF-related activation-induced cytokine|osteoclast differentiation factor|osteoprotegerin ligand|receptor activator of nuclear factor kappa B ligand|tumor necrosis factor (ligand) superfamily, member 11|tumor necrosis factor ligand 6B|tumor necrosis factor superfamily member 11	13q14.11	13	NC_000013.11	42562736	42608013	plus	11	602642
9606	Homo sapiens	4683	0	live	NBN	AT-V1, AT-V2, ATV, NBS, NBS1, P95	nibrin	nibrin|Nijmegen breakage syndrome 1 (nibrin)|cell cycle regulatory protein p95|p95 protein of the MRE11/RAD50 complex	8q21.3	8	NC_000008.11	89933331	89984724	minus	20	602667
9606	Homo sapiens	7098	0	live	TLR3	CD283, IIAE2	toll like receptor 3	toll-like receptor 3	4q35.1	4	NC_000004.12	186069156	186088073	plus	5	603029
9606	Homo sapiens	328	0	live	APEX1	APE, APE1, APEN, APEX, APX, HAP1, REF1	apurinic/apyrimidinic endodeoxyribonuclease 1	DNA-(apurinic or apyrimidinic site) lyase|AP endonuclease class I|AP lyase|APEX nuclease (multifunctional DNA repair enzyme) 1|apurinic-apyrimidinic endonuclease 1|apurinic/apyrimidinic (abasic) endonuclease|deoxyribonuclease (apurinic or apyrimidinic)|protein REF-1|redox factor-1	14q11.2	14	NC_000014.9	20455226	20457767	plus	5	107748
9606	Homo sapiens	983	0	live	CDK1	CDC2, CDC28A, P34CDC2	cyclin dependent kinase 1	cyclin-dependent kinase 1|cell cycle controller CDC2|cell division control protein 2 homolog|cell division cycle 2, G1 to S and G2 to M|cell division protein kinase 1|p34 protein kinase	10q21.2	10	NC_000010.11	60778331	60794852	plus	9	116940
9606	Homo sapiens	55105	0	live	GPATCH2	CT110, GPATC2, PPP1R30, Pfa1	G-patch domain containing 2	G patch domain-containing protein 2|cancer/testis antigen 110|protein phosphatase 1, regulatory subunit 30	1q41	1	NC_000001.11	217426992	217631090	minus	14	616836
9606	Homo sapiens	619402	0	live	HPC5		prostate cancer, hereditary, 5		3p26	3						609299
9606	Homo sapiens	574048	0	live	OVCAS1		Ovarian cancer, epithelial, susceptibility to		3p25-p22	3						607893
9606	Homo sapiens	450093	0	live	LNCR1		Lung cancer 1		6q23-q25	6						608935
9606	Homo sapiens	408260	0	live	HPC4	HPC7	Prostate cancer, hereditary, 4		7p11-q21	7						608658
9606	Homo sapiens	347747	0	live	HPCQTL19		Prostate cancer aggressiveness quantitative trait locus on chromosome 19		19q	19						607592
9606	Homo sapiens	682	0	live	BSG	5F7, CD147, EMMPRIN, EMPRIN, OK, SLC7A11, TCSF	basigin (Ok blood group)	basigin|OK blood group antigen|collagenase stimulatory factor|extracellular matrix metalloproteinase inducer|leukocyte activation antigen M6|tumor cell-derived collagenase stimulatory factor	19p13.3	19	NC_000019.10	571283	583493	plus	10	109480
9606	Homo sapiens	1571	0	live	CYP2E1	CPE1, CYP2E, P450-J, P450C2E	cytochrome P450 family 2 subfamily E member 1	cytochrome P450 2E1|4-nitrophenol 2-hydroxylase|CYPIIE1|cytochrome P450, family 2, subfamily E, polypeptide 1|cytochrome P450, subfamily IIE (ethanol-inducible), polypeptide 1|cytochrome P450-J|flavoprotein-linked monooxygenase|microsomal monooxygenase|xenobiotic monooxygenase	10q26.3	10	NC_000010.11	133527363	133539123	plus	9	124040
9606	Homo sapiens	9201	0	live	DCLK1	CL1, CLICK1, DCAMKL1, DCDC3A, DCLK	doublecortin like kinase 1	serine/threonine-protein kinase DCLK1|doublecortin domain-containing protein 3A|doublecortin-like and CAM kinase-like 1	13q13.3	13	NC_000013.11	35768652	36131939	minus	21	604742
9606	Homo sapiens	9147	0	live	NEMF	NY-CO-1, SDCCAG1	nuclear export mediator factor	nuclear export mediator factor NEMF|antigen NY-CO-1|serologically defined colon cancer antigen 1	14q21.3	14	NC_000014.9	49782083	49853203	minus	37	608378
9606	Homo sapiens	400619	0	live	LINC00511	LCAL5, onco-lncRNA-12	long intergenic non-protein coding RNA 511	lung cancer associated lncRNA 5	17q24.3	17	NC_000017.11	72598041	72640472	minus	5
9606	Homo sapiens	100188867	0	live	HPC14		Prostate cancer, hereditary, 14		11q13	11						611958
9606	Homo sapiens	5460	0	live	POU5F1	OCT3, OCT4, OTF-3, OTF3, OTF4, Oct-3, Oct-4	POU class 5 homeobox 1	POU domain, class 5, transcription factor 1|POU class 5 homeobox 1 transcript variant OCT4B1|POU class 5 homeobox 1 transcript variant OCT4B2|POU class 5 homeobox 1 transcript variant OCT4B3|POU class 5 homeobox 1 transcript variant OCT4B4|POU class 5 homeobox 1 transcript variant OCT4B5|POU class 5 homeobox 1 transcript variant OCT4B6|POU classV homeobox 1 variant 2|POU domain transcription fact…	6p21.33	6	NC_000006.12	31164337	31170682	minus	6	164177
9606	Homo sapiens	57561	0	live	ARRDC3	TLIMP	arrestin domain containing 3	arrestin domain-containing protein 3|TBP-2-like inducible membrane protein|alpha-arrestin 3	5q14.3	5	NC_000005.10	91368631	91383332	minus	9	612464
9606	Homo sapiens	64963	0	live	MRPS11	HCC-2, MRP-S11, S11mt	mitochondrial ribosomal protein S11	28S ribosomal protein S11, mitochondrial|cervical cancer proto-oncogene 2 protein|mitochondrial small ribosomal subunit protein uS11m	15q25.3	15	NC_000015.10	88467708	88480776	plus	7	611977
9606	Homo sapiens	2525	0	live	FUT3	CD174, FT3B, FucT-III, LE, Les	fucosyltransferase 3 (Lewis blood group)	galactoside 3(4)-L-fucosyltransferase|Lewis FT|alpha-(1,3/1,4)-fucosyltransferase|blood group Lewis alpha-4-fucosyltransferase|fucosyltransferase 3 (galactoside 3(4)-L-fucosyltransferase, Lewis blood group)|fucosyltransferase III	19p13.3	19	NC_000019.10	5842888	5851449	minus	5	111100
9606	Homo sapiens	9415	0	live	FADS2	D6D, DES6, FADSD6, LLCDL2, SLL0262, TU13	fatty acid desaturase 2	acyl-CoA 6-desaturase|delta-6 fatty acid desaturase|delta-6-desaturase|linoleoyl-CoA desaturase (delta-6-desaturase)-like 2	11q12.2	11	NC_000011.10	61816203	61867354	plus	13	606149
9606	Homo sapiens	196	0	live	AHR	RP85, bHLHe76	aryl hydrocarbon receptor	aryl hydrocarbon receptor|AH-receptor|ah receptor|aromatic hydrocarbon receptor|class E basic helix-loop-helix protein 76	7p21.1	7	NC_000007.14	17298652	17346147	plus	11	600253
9606	Homo sapiens	140707	0	live	BRI3BP	BNAS1, HCCR-1, HCCR-2, HCCRBP-1, HCCRBP-3, KG19	BRI3 binding protein	BRI3-binding protein|I3-binding protein|cervical cancer 1 proto-oncogene-binding protein KG19|cervical cancer oncogene binding protein	12q24.31	12	NC_000012.12	124993645	125051845	plus	4	615627
9606	Homo sapiens	5329	0	live	PLAUR	CD87, U-PAR, UPAR, URKR	plasminogen activator, urokinase receptor	urokinase plasminogen activator surface receptor|monocyte activation antigen Mo3|u-plasminogen activator receptor form 2|urokinase-type plasminogen activator (uPA) receptor	19q13.31	19	NC_000019.10	43646095	43670346	minus	11	173391
9606	Homo sapiens	3075	0	live	CFH	AHUS1, AMBP1, ARMD4, ARMS1L3, FH, FHL1, HF, HF1, HF2, HUS, CFH	complement factor H	complement factor H|H factor 1 (complement)|H factor 2 (complement)|adrenomedullin binding protein|age-related maculopathy susceptibility 1|beta-1-H-globulin|beta-1H|factor H|factor H-like 1	1q31.3	1	NC_000001.11	196651878	196747504	plus	25	134370
9606	Homo sapiens	10135	0	live	NAMPT	1110035O14Rik, PBEF, PBEF1, VF, VISFATIN	nicotinamide phosphoribosyltransferase	nicotinamide phosphoribosyltransferase|NAmPRTase|pre-B cell-enhancing factor|pre-B-cell colony-enhancing factor 1	7q22.3	7	NC_000007.14	106248298	106284983	minus	11	608764
9606	Homo sapiens	7076	0	live	TIMP1	CLGI, EPA, EPO, HCI, TIMP, TIMP-1	TIMP metallopeptidase inhibitor 1	metalloproteinase inhibitor 1|collagenase inhibitor|epididymis secretory sperm binding protein|erythroid potentiating activity|fibroblast collagenase inhibitor|tissue inhibitor of metalloproteinases 1	Xp11.3	X	NC_000023.11	47582408	47586789	plus	5	305370
9606	Homo sapiens	3596	0	live	IL13	IL-13, P600	interleukin 13	interleukin-13	5q31.1	5	NC_000005.10	132656522	132661110	plus	6	147683
9606	Homo sapiens	7299	0	live	TYR	ATN, CMM8, OCA1, OCA1A, OCAIA, SHEP3	tyrosinase	tyrosinase|LB24-AB|SK29-AB|monophenol monooxygenase|oculocutaneous albinism IA|tumor rejection antigen AB	11q14.3	11	NC_000011.10	89177565	89295759	plus	6	606933
9606	Homo sapiens	152404	0	live	IGSF11	BT-IgSF, CT119, CXADRL1, Igsf13, VSIG3	immunoglobulin superfamily member 11	immunoglobulin superfamily member 11|CXADR like 1|V-set and immunoglobulin domain containing 3|V-set and immunoglobulin domain-containing protein 3|brain and testis-specific immunoglobin superfamily protein|brain and testis-specific immunoglobulin superfamily protein|cancer/testis antigen 119	3q13.32	3	NC_000003.12	118900557	119146064	minus	15	608351
9606	Homo sapiens	113201	0	live	CASC4	H63	cancer susceptibility 4	protein CASC4|cancer susceptibility candidate 4|cancer susceptibility candidate gene 4 protein|gene associated with HER-2/neu overexpression	15q15.3	15	NC_000015.10	44288709	44415758	plus	12
9606	Homo sapiens	1387	0	live	CREBBP	CBP, KAT3A, MKHK1, RSTS, RSTS1	CREB binding protein	CREB-binding protein|histone lysine acetyltransferase CREBBP|protein-lysine acetyltransferase CREBBP	16p13.3	16	NC_000016.10	3725054	3880727	minus	33	600140
9606	Homo sapiens	7298	0	live	TYMS	HST422, TMS, TS	thymidylate synthetase	thymidylate synthase|TSase	18p11.32	18	NC_000018.10	657653	673578	plus	8	188350
9606	Homo sapiens	2260	0	live	FGFR1	BFGFR, CD331, CEK, ECCL, FGFBR, FGFR-1, FLG, FLT-2, FLT2, HBGFR, HH2, HRTFDS, KAL2, N-SAM, OGD, bFGF-R-1	fibroblast growth factor receptor 1	fibroblast growth factor receptor 1|FGFR1/PLAG1 fusion|FMS-like tyrosine kinase 2|basic fibroblast growth factor receptor 1|fms-related tyrosine kinase 2|heparin-binding growth factor receptor|hydroxyaryl-protein kinase|proto-oncogene c-Fgr	8p11.23	8	NC_000008.11	38411138	38468834	minus	24	136350
9606	Homo sapiens	2778	0	live	GNAS	AHO, C20orf451, GPSA, GSA, GSP, NESP, PITA3, POH, SCG6, SgVI, GNAS	GNAS complex locus	protein ALEX|protein GNAS|protein SCG6 (secretogranin VI)|G protein subunit alpha S|adenylate cyclase-stimulating G alpha protein|alternative gene product encoded by XL-exon|extra large alphas protein|guanine nucleotide binding protein (G protein), alpha stimulating activity polypeptide 1|guanine nucleotide regulatory protein|guanine nucleotide-binding protein G(s) subunit alpha isoforms XLas|neu…	20q13.32	20	NC_000020.11	58839681	58911196	plus	23	139320
9606	Homo sapiens	7291	0	live	TWIST1	ACS3, BPES2, BPES3, CRS, CRS1, CSO, SCS, SWCOS, TWIST, bHLHa38	twist family bHLH transcription factor 1	twist-related protein 1|B-HLH DNA binding protein|H-twist|TWIST homolog of drosophila|class A basic helix-loop-helix protein 38|twist basic helix-loop-helix transcription factor 1|twist homolog 1	7p21.1	7	NC_000007.14	19113047	19117636	minus	4	601622
9606	Homo sapiens	1490	0	live	CCN2	CTGF, HCS24, IGFBP8, NOV2	cellular communication network factor 2	CCN family member 2|IBP-8|IGF-binding protein 8|IGFBP-8|connective tissue growth factor|hypertrophic chondrocyte-specific protein 24|insulin-like growth factor-binding protein 8	6q23.2	6	NC_000006.12	131948176	131951372	minus	5	121009
9606	Homo sapiens	8204	0	live	NRIP1	CAKUT3, RIP140	nuclear receptor interacting protein 1	nuclear receptor-interacting protein 1|nuclear factor RIP140|receptor-interacting protein 140	21q11.2-q21.1	21	NC_000021.9	14961235	15065903	minus	10	602490
9606	Homo sapiens	1761	0	live	DMRT1	CT154, DMT1	doublesex and mab-3 related transcription factor 1	doublesex- and mab-3-related transcription factor 1|DM domain expressed in testis 1|DM domain expressed in testis protein 1	9p24.3	9	NC_000009.12	841647	969090	plus	8	602424
9606	Homo sapiens	598	0	live	BCL2L1	BCL-XL/S, BCL2L, BCLX, Bcl-X, PPP1R52	BCL2 like 1	bcl-2-like protein 1|apoptosis regulator Bcl-X|protein phosphatase 1, regulatory subunit 52	20q11.21	20	NC_000020.11	31664452	31723963	minus	6	600039
9606	Homo sapiens	434	0	live	ASIP	AGSW, AGTI, AGTIL, ASP, SHEP9	agouti signaling protein	agouti-signaling protein|agouti signaling protein, nonagouti homolog|agouti switch protein|nonagouti homolog	20q11.22	20	NC_000020.11	34186493	34269344	plus	7	600201
9606	Homo sapiens	6262	0	live	RYR2	ARVC2, ARVD2, RYR-2, RyR, VTSIP	ryanodine receptor 2	ryanodine receptor 2|cardiac muscle ryanodine receptor-calcium release channel|cardiac-type ryanodine receptor|islet-type ryanodine receptor|kidney-type ryanodine receptor|ryanodine receptor 2 (cardiac)|type 2 ryanodine receptor	1q43	1	NC_000001.11	237042184	237833988	plus	107	180902
9606	Homo sapiens	574	0	live	BAGE	BAGE1, CT2.1	B melanoma antigen	B melanoma antigen 1|antigen MZ2-BA|cancer/testis antigen 2.1|cancer/testis antigen family 2, member 1	21p11.1	21						605167
9606	Homo sapiens	959	0	live	CD40LG	CD154, CD40L, HIGM1, IGM, IMD3, T-BAM, TNFSF5, TRAP, gp39, hCD40L	CD40 ligand	CD40 ligand|CD40 antigen ligand|CD40-L|T-B cell-activating molecule|T-cell antigen Gp39|TNF-related activation protein|tumor necrosis factor (ligand) superfamily member 5	Xq26.3	X	NC_000023.11	136648158	136660390	plus	5	300386
9606	Homo sapiens	7026	0	live	NR2F2	ARP-1, ARP1, CHTD4, COUPTF2, COUPTFB, COUPTFII, NF-E3, SVP40, TFCOUP2	nuclear receptor subfamily 2 group F member 2	COUP transcription factor 2|ADP-ribosylation factor related protein 1|COUP transcription factor II|apolipoprotein A-I regulatory protein 1|apolipoprotein AI regulatory protein 1|chicken ovalbumin upstream promoter transcription factor 2|chicken ovalbumin upstream promoter-transcription factor I	15q26.2	15	NC_000015.10	96326046	96340263	plus	6	107773
9606	Homo sapiens	4763	0	live	NF1	NFNS, VRNF, WSS	neurofibromin 1	neurofibromin|neurofibromatosis 1|neurofibromatosis-related protein NF-1|truncated neurofibromin 1	17q11.2	17	NC_000017.11	31094927	31377677	plus	58	613113
9606	Homo sapiens	721	0	live	C4B	C4B112, C4B2, C4B3, C4B5, C4BD, C4B_2, C4F, CH, CO4, CPAMD3, C4B	complement C4B (Chido blood group)	complement C4-B|C3 and PZP-like alpha-2-macroglobulin domain-containing protein 3|Chido form of C4|basic complement C4|complement C4B1a|complement component 4B (Chido blood group)	6p21.33	6	NC_000006.12	32014795	32035418	plus	41	120820
9606	Homo sapiens	89765	0	live	RSPH1	CT79, RSP440A, TSA2, TSGA2, RSPH1	radial spoke head component 1	radial spoke head 1 homolog|cancer/testis antigen 79|male meiotic metaphase chromosome-associated acidic protein|meichroacidin|testes specific gene A2 homolog|testis specific A2 homolog	21q22.3	21	NC_000021.9	42472486	42496246	minus	9	609314
9606	Homo sapiens	846	0	live	CASR	CAR, EIG8, FHH, FIH, GPRC2A, HHC, HHC1, HYPOC1, NSHPT, PCAR1, hCasR	calcium sensing receptor	extracellular calcium-sensing receptor|parathyroid Ca(2+)-sensing receptor 1|parathyroid cell calcium-sensing receptor 1	3q13.33-q21.1	3	NC_000003.12	122183668	122291629	plus	11	601199
9606	Homo sapiens	146852	0	live	ODF4	CT134, CT136, OPPO1	outer dense fiber of sperm tails 4	outer dense fiber protein 4|cancer/testis antigen 134|cancer/testis antigen 136|hOPPO1|outer dense fiber 4|outer dense fiber of sperm tails protein 4|testis-specific protein oppo 1	17p13.1	17	NC_000017.11	8339840	8346048	plus	4	610097
9606	Homo sapiens	5592	0	live	PRKG1	AAT8, PKG, PKG1B, PRKGR1B, cGK, cGK 1, cGK1, cGKI, cGKI-BETA, cGKI-alpha, PRKG1	protein kinase cGMP-dependent 1	cGMP-dependent protein kinase 1|protein kinase, cGMP-dependent, regulatory, type I, beta|protein kinase, cGMP-dependent, type I	10q11.23-q21.1	10	NC_000010.11	50990888	52298350	plus	23	176894
9606	Homo sapiens	1017	0	live	CDK2	CDKN2, p33(CDK2)	cyclin dependent kinase 2	cyclin-dependent kinase 2|cdc2-related protein kinase|cell division protein kinase 2|p33 protein kinase	12q13.2	12	NC_000012.12	55966830	55972789	plus	8	116953
9606	Homo sapiens	1786	0	live	DNMT1	ADCADN, AIM, CXXC9, DNMT, HSN1E, MCMT, m.HsaI	DNA methyltransferase 1	DNA (cytosine-5)-methyltransferase 1|CXXC-type zinc finger protein 9|DNA (cytosine-5-)-methyltransferase 1|DNA MTase HsaI|DNA methyltransferase HsaI	19p13.2	19	NC_000019.10	10133346	10194953	minus	41	126375
9606	Homo sapiens	2171	0	live	FABP5	E-FABP, EFABP, KFABP, PA-FABP, PAFABP	fatty acid binding protein 5	fatty acid-binding protein 5|epidermal-type fatty acid-binding protein|fatty acid binding protein 5 (psoriasis-associated)|psoriasis-associated fatty acid-binding protein homolog	8q21.13	8	NC_000008.11	81280536	81284775	plus	4	605168
9606	Homo sapiens	6657	0	live	SOX2	ANOP3, MCOPS3	SRY-box transcription factor 2	transcription factor SOX-2|SRY (sex determining region Y)-box 2|SRY-box 2|SRY-related HMG-box gene 2|sex determining region Y-box 2|transcription factor SOX2	3q26.33	3	NC_000003.12	181711925	181714436	plus	1	184429
9606	Homo sapiens	958	0	live	CD40	Bp50, CDW40, TNFRSF5, p50	CD40 molecule	tumor necrosis factor receptor superfamily member 5|B cell surface antigen CD40|B cell-associated molecule|CD40 molecule, TNF receptor superfamily member 5|CD40L receptor	20q13.12	20	NC_000020.11	46118242	46129858	plus	9	109535
9606	Homo sapiens	10642	0	live	IGF2BP1	CRD-BP, CRDBP, IMP-1, IMP1, VICKZ1, ZBP1	insulin like growth factor 2 mRNA binding protein 1	insulin-like growth factor 2 mRNA-binding protein 1|IGF-II mRNA-binding protein 1|IGF2 mRNA-binding protein 1|VICKZ family member 1|ZBP-1|coding region determinant-binding protein|insulin-like growth factor 2 mRNA binding protein 1 deltaN CRDBP|zipcode-binding protein 1	17q21.32	17	NC_000017.11	48997385	49056145	plus	16	608288
9606	Homo sapiens	1803	0	live	DPP4	ADABP, ADCP2, CD26, DPPIV, TP103	dipeptidyl peptidase 4	dipeptidyl peptidase 4|ADCP-2|DPP IV|T-cell activation antigen CD26|adenosine deaminase complexing protein 2|dipeptidyl peptidase IV|dipeptidylpeptidase 4|dipeptidylpeptidase IV (CD26, adenosine deaminase complexing protein 2)	2q24.2	2	NC_000002.12	161992241	162074215	minus	26	102720
9606	Homo sapiens	728712	0	live	SPANXA2	CT11.1, CT11.3, SPANX, SPANX-A, SPANX-C, SPANXA, SPANXC	SPANX family member A2	sperm protein associated with the nucleus on the X chromosome A|Cancer/testis antigen 11.3|Cancer/testis-associated protein CTp11|Nuclear-associated protein SPAN-Xc|SPANX family member A|Sperm protein associated with the nucleus on the X chromosome C|cancer/testis antigen 11.1|nuclear-associated protein SPAN-Xa|sperm protein associated with the nucleus, X chromosome, family member A2	Xq27.2	X	NC_000023.11	141589708	141590762	plus	2	300493
9606	Homo sapiens	148479	0	live	PHF13	PHF5, SPOC1	PHD finger protein 13	PHD finger protein 13|PHD zinc finger protein PHF5|survival time-associated PHD finger protein in ovarian cancer 1|survival time-associated PHD protein in ovarian cancer	1p36.31	1	NC_000001.11	6613731	6624030	plus	5
9606	Homo sapiens	1457	0	live	CSNK2A1	CK2A1, CKII, Cka1, Cka2, OCNDS	casein kinase 2 alpha 1	casein kinase II subunit alpha|CK2 catalytic subunit alpha|casein kinase 2, alpha 1 polypeptide|casein kinase II alpha 1 polypeptide pseudogene|casein kinase II alpha 1 subunit|protein kinase CK2	20p13	20	NC_000020.11	472498	543790	minus	14	115440
9606	Homo sapiens	149998	0	live	LIPI	CT17, LPDL, PLA1C, PRED5, mPA-PLA1 beta	lipase I	lipase member I|LPD lipase|cancer/testis antigen 17|lipase, member I|membrane-associated phosphatidic acid-selective phospholipase A1-beta	21q11.2	21	NC_000021.9	14108813	14210955	minus	12	609252
9606	Homo sapiens	3315	0	live	HSPB1	CMT2F, HEL-S-102, HMN2B, HS.76067, HSP27, HSP28, Hsp25, SRP27	heat shock protein family B (small) member 1	heat shock protein beta-1|28 kDa heat shock protein|epididymis secretory protein Li 102|estrogen-regulated 24 kDa protein|heat shock 27 kDa protein|heat shock 27kD protein 1|heat shock 27kDa protein 1|stress-responsive protein 27	7q11.23	7	NC_000007.14	76302673	76304292	plus	3	602195
9606	Homo sapiens	1191	0	live	CLU	AAG4, APO-J, APOJ, CLI1, CLU2, KUB1, NA1/NA2, SGP-2, SGP2, SP-40, TRPM-2, TRPM2, CLU	clusterin	clusterin|aging-associated protein 4|apolipoprotein J|complement cytolysis inhibitor|complement lysis inhibitor|complement-associated protein SP-40,40|epididymis secretory sperm binding protein|ku70-binding protein 1|sulfated glycoprotein 2|testosterone-repressed prostate message 2	8p21.1	8	NC_000008.11	27596917	27615031	minus	11	185430
9606	Homo sapiens	407040	0	live	MIR34A	MIRN34A, miRNA34A, mir-34, mir-34a	microRNA 34a	hsa-mir-34a	1p36.22	1	NC_000001.11	9151668	9151777	minus	1	611172
9606	Homo sapiens	1488	0	live	CTBP2		C-terminal binding protein 2	C-terminal-binding protein 2|ribeye	10q26.13	10	NC_000010.11	124984317	125161039	minus	20	602619
9606	Homo sapiens	100188841	0	live	CRCS2		Colorectal cancer, susceptibility to, 2		8q24	8						611469
9606	Homo sapiens	119559	0	live	SFXN4	BCRM1, COXPD18, SLC56A4	sideroflexin 4	sideroflexin-4|breast cancer resistance marker 1	10q26.11	10	NC_000010.11	119140767	119165728	minus	16	615564
9606	Homo sapiens	51006	0	live	SLC35C2	BA394O2.1, C20orf5, CGI-15, OVCOV1	solute carrier family 35 member C2	solute carrier family 35 member C2|ovarian cancer-overexpressed gene 1 protein|solute carrier family 35 (GDP-fucose transporter), member C2	20q13.12	20	NC_000020.11	46345984	46364458	minus	12
9606	Homo sapiens	283987	0	live	HID1	17orf28, C17orf28, DMC1, HID-1	HID1 domain containing	protein HID1|HID1 domain-containing protein|UPF0663 transmembrane protein C17orf28|down-regulated in multiple cancers 1|downregulated in multiple cancer 1|protein hid-1 homolog	17q25.1	17	NC_000017.11	74950742	74972763	minus	19	605752
9606	Homo sapiens	641654	0	live	HEPN1		hepatocellular carcinoma, down-regulated 1	putative cancer susceptibility gene HEPN1 protein|HEPACAM opposite strand 1|cancer susceptibility gene HEPN1	11q24.2	11	NC_000011.10	124919250	124920677	plus	1	611641
9606	Homo sapiens	1545	0	live	CYP1B1	ASGD6, CP1B, CYPIB1, GLC3A, P4501B1	cytochrome P450 family 1 subfamily B member 1	cytochrome P450 1B1|aryl hydrocarbon hydroxylase|cytochrome P450, family 1, subfamily B, polypeptide 1|cytochrome P450, subfamily I (dioxin-inducible), polypeptide 1 (glaucoma 3, primary infantile)|dioxin-inducible cytochrome p450|flavoprotein-linked monooxygenase|hydroperoxy icosatetraenoate dehydratase|microsomal monooxygenase|xenobiotic monooxygenase	2p22.2	2	NC_000002.12	38067603	38076181	minus	3	601771
9606	Homo sapiens	1728	0	live	NQO1	DHQU, DIA4, DTD, NMOR1, NMORI, QR1	NAD(P)H quinone dehydrogenase 1	NAD(P)H dehydrogenase [quinone] 1|DT-diaphorase|NAD(P)H dehydrogenase, quinone 1|NAD(P)H:Quinone acceptor oxidoreductase type 1|NAD(P)H:menadione oxidoreductase 1|NAD(P)H:quinone oxidoreductase 1|NAD(P)H:quinone oxireductase|azoreductase|diaphorase (NADH/NADPH) (cytochrome b-5 reductase)|diaphorase-4|dioxin-inducible 1|menadione reductase|phylloquinone reductase|quinone reductase 1	16q22.1	16	NC_000016.10	69709401	69726560	minus	6	125860
9606	Homo sapiens	85313	0	live	PPIL4	HDCME13P	peptidylprolyl isomerase like 4	peptidyl-prolyl cis-trans isomerase-like 4|PPIase|cyclophilin-like protein PPIL4|cyclophilin-type peptidyl-prolyl cis-trans isomerase|peptidylprolyl isomerase (cyclophilin)-like 4|rotamase PPIL4|serologically defined breast cancer antigen NY-BR-18	6q25.1	6	NC_000006.12	149504495	149546043	minus	13	607609
9606	Homo sapiens	54921	0	live	CHTF8	CTF8, DERPC	chromosome transmission fidelity factor 8	chromosome transmission fidelity protein 8 homolog|CTF8, chromosome transmission fidelity factor 8 homolog|decreased expression in renal and prostate cancer protein	16q22.1	16	NC_000016.10	69118010	69132588	minus	5	613202
9606	Homo sapiens	1268	0	live	CNR1	CANN6, CB-R, CB1, CB1A, CB1K5, CB1R, CNR	cannabinoid receptor 1	cannabinoid receptor 1|cannabinoid receptor 1 (brain)|central cannabinoid receptor	6q15	6	NC_000006.12	88139864	88167349	minus	8	114610
9606	Homo sapiens	100188834	0	live	HPC10		Prostate cancer, hereditary, 10		8q24	8						611100
9606	Homo sapiens	574447	0	live	MIR146B	MIRN146B, miRNA146B, mir-146b	microRNA 146b	hsa-mir-146b	10q24.32	10	NC_000010.11	102436512	102436584	plus	1	610567
9606	Homo sapiens	5295	0	live	PIK3R1	AGM7, GRB1, IMD36, p85, p85-ALPHA	phosphoinositide-3-kinase regulatory subunit 1	phosphatidylinositol 3-kinase regulatory subunit alpha|PI3-kinase subunit p85-alpha|PI3K regulatory subunit alpha|phosphatidylinositol 3-kinase 85 kDa regulatory subunit alpha|phosphatidylinositol 3-kinase, regulatory subunit, polypeptide 1 (p85 alpha)|phosphatidylinositol 3-kinase-associated p-85 alpha|phosphoinositide-3-kinase regulatory subunit alpha|phosphoinositide-3-kinase, regulatory subun…	5q13.1	5	NC_000005.10	68215737	68301821	plus	22	171833
9606	Homo sapiens	5111	0	live	PCNA	ATLD2	proliferating cell nuclear antigen	proliferating cell nuclear antigen|DNA polymerase delta auxiliary protein|cyclin	20p12.3	20	NC_000020.11	5114953	5126622	minus	7	176740
9606	Homo sapiens	5580	0	live	PRKCD	ALPS3, CVID9, MAY1, PKCD, nPKC-delta	protein kinase C delta	protein kinase C delta type|protein kinase C delta VIII|tyrosine-protein kinase PRKCD	3p21.1	3	NC_000003.12	53161209	53192717	plus	22	176977
9606	Homo sapiens	79664	0	live	ICE2	BRCC1, NARG2	interactor of little elongation complex ELL subunit 2	little elongation complex subunit 2|NMDA receptor regulated 2|NMDA receptor-regulated gene 2|NMDA receptor-regulated protein 2|breast cancer cell 1|interactor of little elongator complex ELL subunit 2	15q22.2	15	NC_000015.10	60419609	60479142	minus	20	610835
9606	Homo sapiens	10169	0	live	SERF2	4F5REL, FAM2C, H4F5REL, HsT17089	small EDRK-rich factor 2	small EDRK-rich factor 2|gastric cancer-related protein VRG107|protein 4F5-related	15q15.3	15	NC_000015.10	43777086	43796089	plus	6	605054
9606	Homo sapiens	1385	0	live	CREB1	CREB, CREB-1	cAMP responsive element binding protein 1	cyclic AMP-responsive element-binding protein 1|active transcription factor CREB|cAMP-response element-binding protein-1|cyclic adenosine 3',5'-monophosphate response element binding protein|cyclic adenosine 3',5'-monophosphate response element-binding protein CREB|transactivator protein	2q33.3	2	NC_000002.12	207529943	207605988	plus	13	123810
9606	Homo sapiens	2308	0	live	FOXO1	FKH1, FKHRA, FOXO1	forkhead box O1	forkhead box protein O1|forkhead box protein O1A|forkhead, Drosophila, homolog of, in rhabdomyosarcoma	13q14.11	13	NC_000013.11	40555667	40666641	minus	5	136533
9606	Homo sapiens	2885	0	live	GRB2	ASH, EGFRBP-GRB2, Grb3-3, MST084, MSTP084, NCKAP2	growth factor receptor bound protein 2	growth factor receptor-bound protein 2|HT027|SH2/SH3 adapter GRB2|abundant SRC homology|epidermal growth factor receptor-binding protein GRB2|epididymis secretory sperm binding protein|growth factor receptor-bound protein 3|protein Ash	17q25.1	17	NC_000017.11	75318076	75405709	minus	6	108355
9606	Homo sapiens	152518	0	live	NFXL1	CDZFP, HOZFP, OZFP, URCC5	nuclear transcription factor, X-box binding like 1	NF-X1-type zinc finger protein NFXL1|cytoplasm-distribution zinc finger protein|ovarian zinc finger protein|up-regulated in colon cancer 5	4p12	4	NC_000004.12	47847233	47914667	minus	25
9606	Homo sapiens	796	0	live	CALCA	CALC1, CGRP, CGRP-I, CGRP1, CT, KC, PCT	calcitonin related polypeptide alpha	calcitonin|calcitonin gene-related peptide 1|alpha-type CGRP|calcitonin 1|calcitonin gene-related peptide I|calcitonin/calcitonin-related polypeptide, alpha|katacalcin	11p15.2	11	NC_000011.10	14966668	14972361	minus	6	114130
9606	Homo sapiens	5465	0	live	PPARA	NR1C1, PPAR, PPARalpha, hPPAR	peroxisome proliferator activated receptor alpha	peroxisome proliferator-activated receptor alpha|PPAR-alpha|nuclear receptor subfamily 1 group C member 1|peroxisome proliferative activated receptor, alpha|peroxisome proliferator-activated nuclear receptor alpha variant 3	22q13.31	22	NC_000022.11	46150526	46243756	plus	14	170998
9606	Homo sapiens	84366	0	live	PRAC1	C17orf92, PRAC	PRAC1 small nuclear protein	small nuclear protein PRAC1|prostate cancer susceptibility candidate 1|prostate cancer susceptibility candidate protein 1|prostate, rectum and colon expressed gene protein|small nuclear protein PRAC	17q21.32	17	NC_000017.11	48721719	48722518	minus	2	609819
9606	Homo sapiens	2646	0	live	GCKR	FGQTL5, GKRP	glucokinase regulator	glucokinase regulatory protein|glucokinase (hexokinase 4) regulator|hexokinase 4 regulator	2p23.3	2	NC_000002.12	27496839	27523689	plus	20	600842
9606	Homo sapiens	8068	0	live	BRCATA		Breast cancer, 11;22 translocation associated									600048
9606	Homo sapiens	116093	0	live	DIRC1		disrupted in renal carcinoma 1	disrupted in renal cancer protein	2q32.2	2	NC_000002.12	188733738	188790123	minus	2	606423
9606	Homo sapiens	8501	0	live	SLC43A1	LAT3, PB39, POV1, R00504	solute carrier family 43 member 1	large neutral amino acids transporter small subunit 3|L-type amino acid transporter 3|prostate cancer overexpressed gene 1 protein|solute carrier family 43 (amino acid system L transporter), member 1	11q12.1	11	NC_000011.10	57484531	57516561	minus	18	603733
9606	Homo sapiens	255313	0	live	CT47A11	CT47.11	cancer/testis antigen family 47 member A11	; cancer/testis antigen 47A|cancer/testis CT47 family, member 11	Xq24	X	NC_000023.11	120933840	120937260	minus	4	300592
9606	Homo sapiens	648	0	live	BMI1	FLVI2/BMI1, PCGF4, RNF51, flvi-2/bmi-1	BMI1 proto-oncogene, polycomb ring finger	polycomb complex protein BMI-1|B lymphoma Mo-MLV insertion region 1 homolog|BMI1 polycomb ring finger oncogene|BMI1 polycomb ring finger proto-oncogene|murine leukemia viral (bmi-1) oncogene homolog|polycomb group RING finger protein 4|polycomb group protein Bmi1|ring finger protein 51	10p12.2	10	NC_000010.11	22321099	22331484	plus	10	164831
9606	Homo sapiens	1116	0	live	CHI3L1	ASRT7, CGP-39, GP-39, GP39, HC-gp39, HCGP-3P, YK-40, YKL-40, YKL40, YYL-40, hCGP-39	chitinase 3 like 1	chitinase-3-like protein 1|39 kDa synovial protein|cartilage glycoprotein 39|chitinase 3-like 1 (cartilage glycoprotein-39)	1q32.1	1	NC_000001.11	203178931	203186704	minus	10	601525
9606	Homo sapiens	4323	0	live	MMP14	MMP-14, MMP-X1, MT-MMP, MT-MMP 1, MT1-MMP, MT1MMP, MTMMP1, WNCHRS	matrix metallopeptidase 14	matrix metalloproteinase-14|matrix metallopeptidase 14 (membrane-inserted)|membrane type 1 metalloprotease|membrane-type-1 matrix metalloproteinase	14q11.2	14	NC_000014.9	22836585	22847758	plus	10	600754
9606	Homo sapiens	90865	0	live	IL33	C9orf26, DVS27, IL1F11, NF-HEV, NFEHEV	interleukin 33	interleukin-33|DVS27-related protein|interleukin-1 family member 11|nuclear factor for high endothelial venules|nuclear factor from high endothelial venules	9p24.1	9	NC_000009.12	6214591	6257983	plus	11	608678
9606	Homo sapiens	2896	0	live	GRN	CLN11, GEP, GP88, PCDGF, PEPI, PGRN	granulin precursor	progranulin|PC cell-derived growth factor|acrogranin|epithelin|glycoprotein 88|glycoprotein of 88 Kda|granulin-epithelin|granulins|proepithelin	17q21.31	17	NC_000017.11	44345086	44353106	plus	14	138945
9606	Homo sapiens	8405	0	live	SPOP	BTBD32, TEF2	speckle type BTB/POZ protein	speckle-type POZ protein|HIB homolog 1|roadkill homolog 1	17q21.33	17	NC_000017.11	49598884	49678163	minus	16	602650
9606	Homo sapiens	5328	0	live	PLAU	ATF, BDPLT5, QPD, UPA, URK, u-PA	plasminogen activator, urokinase	urokinase-type plasminogen activator|U-plasminogen activator|plasminogen activator, urinary	10q22.2	10	NC_000010.11	73909182	73917501	plus	12	191840
9606	Homo sapiens	860	0	live	RUNX2	AML3, CBF-alpha-1, CBFA1, CCD, CCD1, CLCD, OSF-2, OSF2, PEA2aA, PEBP2aA	RUNX family transcription factor 2	runt-related transcription factor 2|PEA2-alpha A|PEBP2-alpha A|SL3-3 enhancer factor 1 alpha A subunit|SL3/AKV core-binding factor alpha A subunit|acute myeloid leukemia 3 protein|core-binding factor, runt domain, alpha subunit 1|oncogene AML-3|osteoblast-specific transcription factor 2|polyomavirus enhancer-binding protein 2 alpha A subunit|runt related transcription factor 2	6p21.1	6	NC_000006.12	45328317	45551082	plus	10	600211
9606	Homo sapiens	6469	0	live	SHH	HHG1, HLP3, HPE3, MCOPCB5, SMMCI, ShhNC, TPT, TPTPS	sonic hedgehog signaling molecule	sonic hedgehog protein|shh unprocessed N-terminal signaling and C-terminal autoprocessing domains|sonic hedgehog homolog	7q36.3	7	NC_000007.14	155799980	155812463	minus	8	600725
9606	Homo sapiens	3667	0	live	IRS1	HIRS-1	insulin receptor substrate 1	insulin receptor substrate 1|IRS-1	2q36.3	2	NC_000002.12	226731317	226798790	minus	2	147545
9606	Homo sapiens	2155	0	live	F7	SPCA	coagulation factor VII	coagulation factor VII|FVII coagulation protein|coagulation factor VII (serum prothrombin conversion accelerator)|eptacog alfa|proconvertin	13q34	13	NC_000013.11	113105773	113120685	plus	10	613878
9606	Homo sapiens	3308	0	live	HSPA4	APG-2, HEL-S-5a, HS24/P52, HSPH2, RY, hsp70, hsp70RY	heat shock protein family A (Hsp70) member 4	heat shock 70 kDa protein 4|epididymis secretory sperm binding protein Li 5a|heat shock 70-related protein APG-2|heat shock 70kD protein 4|heat shock 70kDa protein 4|heat shock protein, 110 kDa|hsp70 RY	5q31.1	5	NC_000005.10	133052013	133106449	plus	19	601113
9606	Homo sapiens	84300	0	live	UQCC2	C6orf125, C6orf126, Cbp6, M19, MC3DN7, MNF1, bA6B20.2	ubiquinol-cytochrome c reductase complex assembly factor 2	ubiquinol-cytochrome-c reductase complex assembly factor 2|breast cancer-associated protein SGA-81M|cytochrome B protein synthesis 6 homolog|mitochondrial nucleoid factor 1|mitochondrial protein M19	6p21.31	6	NC_000006.12	33696764	33711700	minus	4	614461
9606	Homo sapiens	6447	0	live	SCG5	7B2, P7B2, SGNE1, SgV	secretogranin V	neuroendocrine protein 7B2|pituitary polypeptide|prohormone convertase chaperone|secretogranin-5|secretory granule endocrine protein I|secretory granule, neuroendocrine protein 1 (7B2 protein)	15q13.3	15	NC_000015.10	32641613	32697098	plus	6	173120
9606	Homo sapiens	7276	0	live	TTR	ATTR, CTS, CTS1, HEL111, HsT2651, PALB, TBPA	transthyretin	transthyretin|epididymis luminal protein 111|prealbumin, amyloidosis type I|thyroxine-binding prealbumin	18q12.1	18	NC_000018.10	31591877	31598821	plus	4	176300
9606	Homo sapiens	8878	0	live	SQSTM1	A170, DMRV, FTDALS3, NADGP, OSIL, PDB3, ZIP3, p60, p62, p62B	sequestosome 1	sequestosome-1|EBI3-associated protein of 60 kDa|EBI3-associated protein p60|EBIAP|autophagy receptor p62|oxidative stress induced like|phosphotyrosine independent ligand for the Lck SH2 domain p62|phosphotyrosine-independent ligand for the Lck SH2 domain of 62 kDa|ubiquitin-binding protein p62	5q35.3	5	NC_000005.10	179806393	179838078	plus	11	601530
9606	Homo sapiens	4544	0	live	MTNR1B	FGQTL2, MEL-1B-R, MT2	melatonin receptor 1B	melatonin receptor type 1B|mel1b receptor|melatonin receptor 1B variant b|melatonin receptor MEL1B	11q14.3	11	NC_000011.10	92969623	92986241	plus	4	600804
9606	Homo sapiens	7431	0	live	VIM		vimentin	vimentin|epididymis secretory sperm binding protein	10p13	10	NC_000010.11	17228241	17237593	plus	10	193060
9606	Homo sapiens	56683	0	live	CFAP298	C21orf48, C21orf59, CILD26, FBB18, Kur	cilia and flagella associated protein 298	cilia- and flagella-associated protein 298|UPF0769 protein C21orf59|kurly homolog|prostate cancer upregulated protein 1|protein kurly homolog	21q22.11	21	NC_000021.9	32599354	32612871	minus	7	615494
9606	Homo sapiens	331	0	live	XIAP	API3, BIRC4, IAP-3, ILP1, MIHA, XLP2, hIAP-3, hIAP3	X-linked inhibitor of apoptosis	E3 ubiquitin-protein ligase XIAP|IAP-like protein|IAP-like protein 1|RING-type E3 ubiquitin transferase XIAP|X-linked IAP|X-linked inhibitor of apoptosis, E3 ubiquitin protein ligase|baculoviral IAP repeat-containing protein 4|inhibitor of apoptosis protein 3	Xq25	X	NC_000023.11	123859812	123913979	plus	9	300079
9606	Homo sapiens	4211	0	live	MEIS1		Meis homeobox 1	homeobox protein Meis1|Meis1, myeloid ecotropic viral integration site 1 homolog|WUGSC:H_NH0444B04.1|leukemogenic homolog protein	2p14	2	NC_000002.12	66435125	66573869	plus	13	601739
9606	Homo sapiens	3620	0	live	IDO1	IDO, IDO-1, INDO	indoleamine 2,3-dioxygenase 1	indoleamine 2,3-dioxygenase 1|indolamine 2,3 dioxygenase|indole 2,3-dioxygenase|indoleamine-pyrrole 2,3-dioxygenase	8p11.21	8	NC_000008.11	39913891	39928790	plus	10	147435
9606	Homo sapiens	5027	0	live	P2RX7	P2X7	purinergic receptor P2X 7	P2X purinoceptor 7|ATP receptor|P2X7 receptor|P2Z receptor|purinergic receptor P2X, ligand gated ion channel, 7|purinergic receptor P2X7 variant A|purnergic receptor P2X 7	12q24.31	12	NC_000012.12	121132819	121188032	plus	14	602566
9606	Homo sapiens	100287082	0	live	GACAT2	MTCL1-AS1, MTCL1AS1	gastric cancer associated transcript 2	HMlincRNA717|MTCL1 antisense RNA 1|gastric cancer associated transcript 2 (non-protein coding)	18p11.22	18	NC_000018.10	8695856	8707621	minus	2	616131
9606	Homo sapiens	1917	0	live	EEF1A2	EEF1AL, EF-1-alpha-2, EF1A, EIEE33, HS1, MRD38, STN, STNL	eukaryotic translation elongation factor 1 alpha 2	elongation factor 1-alpha 2|eukaryotic elongation factor 1 A-2|statin-S1	20q13.33	20	NC_000020.11	63488014	63499083	minus	8	602959
9606	Homo sapiens	84677	0	live	DSCR8	C21orf65, CT25.1a, CT25.1b, MMA-1, MMA-1a, MMA-1b, MMA1, MTAG2	Down syndrome critical region 8	Down syndrome critical region 8 (non-protein coding)|Down syndrome critical region gene 8|cancer/testis antigen family 25, member 1a|cancer/testis antigen family 25, member 1b|malignant melanoma associated protein 1|malignant melanoma-associated 1|melanoma-testis-associated protein 2	21q22.13	21	NC_000021.9	38121451	38156511	plus	4	613396
9606	Homo sapiens	2022	0	live	ENG	END, HHT1, ORW1	endoglin	endoglin|CD105 antigen	9q34.11	9	NC_000009.12	127815012	127854773	minus	16	131195
9606	Homo sapiens	55789	0	live	DEPDC1B	BRCC3, XTP1	DEP domain containing 1B	DEP domain-containing protein 1B|HBV X-transactivated gene 8 protein|HBV XAg-transactivated protein 8|HBxAg transactivated protein 1|breast cancer cell 3	5q12.1	5	NC_000005.10	60596912	60700166	minus	15	616073
9606	Homo sapiens	9754	0	live	STARD8	ARHGAP38, DLC3, STARTGAP3	StAR related lipid transfer domain containing 8	stAR-related lipid transfer protein 8|START domain containing 8|StAR-related lipid transfer (START) domain containing 8|deleted in liver cancer 3 protein	Xq13.1	X	NC_000023.11	68647669	68725842	plus	17	300689
9606	Homo sapiens	6765	0	live	ST8	OVC, OVCS	suppression of tumorigenicity 8 (ovarian)	Oncogene OVC (ovarian adenocarcinoma oncogene)|ovarian cancer, familial	6q25-q27	6						167000
9606	Homo sapiens	7412	0	live	VCAM1	CD106, INCAM-100	vascular cell adhesion molecule 1	vascular cell adhesion protein 1|CD106 antigen	1p21.2	1	NC_000001.11	100719640	100739045	plus	9	192225
9606	Homo sapiens	728911	0	live	CT45A2	CT45-2, CT45.2, CT45A8, CT45A9	cancer/testis antigen family 45 member A2	cancer/testis antigen family 45 member A2|Cancer/testis antigen 45A8|Cancer/testis antigen 45A9|Cancer/testis antigen family 45 member A8|Cancer/testis antigen family 45 member A9|cancer/testis antigen 45-2|cancer/testis antigen 45A2|cancer/testis antigen CT45	Xq26.3	X	NC_000023.11	135811668	135820062	minus	5	300793
9606	Homo sapiens	11186	0	live	RASSF1	123F2, NORE2AA, RDA32, REH3P21, RASSF1	Ras association domain family member 1	ras association domain-containing protein 1|Ras association (RalGDS/AF-6) domain family member 1|WUGSC:H_LUCA12.5|cardiac-specific ras association domain family 1 protein|pancreas-specific ras association domain family 1 protein|tumor suppressor protein RDA32	3p21.31	3	NC_000003.12	50329786	50340936	minus	8	605082
9606	Homo sapiens	7052	0	live	TGM2	TG(C), TGC	transglutaminase 2	protein-glutamine gamma-glutamyltransferase 2|C polypeptide, protein-glutamine-gamma-glutamyltransferase|TGase C|TGase H|TGase-2|tissue transglutaminase|transglutaminase C|transglutaminase H	20q11.23	20	NC_000020.11	38127385	38166508	minus	14	190196
9606	Homo sapiens	998	0	live	CDC42	CDC42Hs, G25K, TKS	cell division cycle 42	cell division control protein 42 homolog|G25K GTP-binding protein|GTP binding protein, 25kDa|dJ224A6.1.1 (cell division cycle 42 (GTP-binding protein, 25kD))|dJ224A6.1.2 (cell division cycle 42 (GTP-binding protein, 25kD))|growth-regulating protein|small GTP binding protein CDC42	1p36.12	1	NC_000001.11	22052709	22101360	plus	8	116952
9606	Homo sapiens	867	0	live	CBL	C-CBL2, FRA11B, NSLL, RNF55, CBL	Cbl proto-oncogene	E3 ubiquitin-protein ligase CBL|Cas-Br-M (murine) ecotropic retroviral transforming sequence|Cbl proto-oncogene, E3 ubiquitin protein ligase|RING finger protein 55|RING-type E3 ubiquitin transferase CBL|casitas B-lineage lymphoma proto-oncogene|fragile site, folic acid type, rare, fra(11)(q23.3)|oncogene CBL2|proto-oncogene c-Cbl|signal transduction protein CBL	11q23.3	11	NC_000011.10	119206339	119308149	plus	16	165360
9606	Homo sapiens	81706	0	live	PPP1R14C	CPI17-like, KEPI, NY-BR-81	protein phosphatase 1 regulatory inhibitor subunit 14C	protein phosphatase 1 regulatory subunit 14C|PKC-potentiated PP1 inhibitory protein|kinase C-enhanced PP1 inhibitor|kinase-enhanced PP1 inhibitor|serologically defined breast cancer antigen NY-BR-81	6q25.1	6	NC_000006.12	150143044	150250392	plus	5	613242
9606	Homo sapiens	2212	0	live	FCGR2A	CD32, CD32A, CDw32, FCG2, FCGR21, FcGR, IGFR2, FCGR2A	Fc fragment of IgG receptor IIa	low affinity immunoglobulin gamma Fc region receptor II-a|Fc fragment of IgG, low affinity IIa, receptor (CD32)|Fc gamma receptor RIIa3|Immunoglobulin G Fc receptor II|fc-gamma-RIIa|fcRII-a|igG Fc receptor II-a	1q23.3	1	NC_000001.11	161505430	161524048	plus	12	146790
9606	Homo sapiens	93426	0	live	SYCE1	C10orf94, CT76, POF12, SPGF15	synaptonemal complex central element protein 1	synaptonemal complex central element protein 1|cancer/testis antigen 76|epididymis secretory sperm binding protein	10q26.3	10	NC_000010.11	133553900	133568275	minus	15	611486
9606	Homo sapiens	571	0	live	BACH1	BACH-1, BTBD24	BTB domain and CNC homolog 1	transcription regulator protein BACH1|BTB and CNC homology 1, basic leucine zipper transcription factor 1|basic region leucine zipper transcriptional regulator BACH1	21q21.3	21	NC_000021.9	29298922	29361896	plus	11	602751
9606	Homo sapiens	811	0	live	CALR	CRT, HEL-S-99n, RO, SSA, cC1qR	calreticulin	calreticulin|CRP55|ERp60|HACBP|Sicca syndrome antigen A (autoantigen Ro; calreticulin)|calregulin|endoplasmic reticulum resident protein 60|epididymis secretory sperm binding protein Li 99n|grp60	19p13.13	19	NC_000019.10	12938609	12944489	plus	9	109091
9606	Homo sapiens	87	0	live	ACTN1	BDPLT15	actinin alpha 1	alpha-actinin-1|F-actin cross-linking protein|actinin 1 smooth muscle|alpha-actinin cytoskeletal isoform|epididymis secretory sperm binding protein|non-muscle alpha-actinin-1	14q22-q24	14	NC_000014.9	68874123	68979366	minus	24	102575
9606	Homo sapiens	92305	0	live	TMEM129	D4S2561E	transmembrane protein 129	E3 ubiquitin-protein ligase TM129|RING-type E3 ubiquitin transferase TM129|transmembrane protein 129, E3 ubiquitin protein ligase	4p16.3	4	NC_000004.12	1715952	1721373	minus	6	615975
9606	Homo sapiens	7057	0	live	THBS1	THBS, THBS-1, TSP, TSP-1, TSP1	thrombospondin 1	thrombospondin-1|glycoprotein G|thrombospondin-1p180|thrombospondin-p50	15q14	15	NC_000015.10	39581079	39599466	plus	22	188060
9606	Homo sapiens	948	0	live	CD36	BDPLT10, CHDS7, FAT, GP3B, GP4, GPIV, PASIV, SCARB3	CD36 molecule	platelet glycoprotein 4|CD36 antigen (collagen type I receptor, thrombospondin receptor)|CD36 molecule (thrombospondin receptor)|GPIIIB|PAS IV|PAS-4 protein|cluster determinant 36|fatty acid translocase|glycoprotein IIIb|leukocyte differentiation antigen CD36|platelet glycoprotein IV|scavenger receptor class B, member 3	7q21.11	7	NC_000007.14	80602207	80679277	plus	19	173510
9606	Homo sapiens	2305	0	live	FOXM1	FKHL16A, FOXM1B, FOXM1C, HFH-11, HFH11, HNF-3, INS-1, MPHOSPH2, MPP-2, MPP2, PIG29, TRIDENT, FOXM1	forkhead box M1	forkhead box protein M1|Forkhead, drosophila, homolog-like 16|HNF-3/fork-head homolog 11|M-phase phosphoprotein 2|MPM-2 reactive phosphoprotein 2|a novel forkhead box M1 isoform FOXM1D|forkhead box M1-D|forkhead-related protein FKHL16|hepatocyte nuclear factor 3 forkhead homolog 11|transcription factor Trident|winged-helix factor from INS-1 cells	12p13.33	12	NC_000012.12	2857680	2877174	minus	11	602341
9606	Homo sapiens	4112	0	live	MAGEB1	CT3.1, DAM10, MAGE-Xp, MAGEL1	MAGE family member B1	; melanoma-associated antigen B1|DSS/AHC critical interval MAGE superfamily 10|MAGE-B1 antigen|MAGE-XP antigen|cancer/testis antigen 3.1|cancer/testis antigen family 3, member 1|melanoma antigen family B, 1|melanoma antigen family B1	Xp21.2	X	NC_000023.11	30243731	30252040	plus	5	300097
9606	Homo sapiens	22853	0	live	LMTK2	AATYK2, BREK, KPI-2, KPI2, LMR2, PPP1R100, cprk, hBREK	lemur tyrosine kinase 2	serine/threonine-protein kinase LMTK2|CDK5/p35-regulated kinase|apoptosis-associated tyrosine kinase 2|brain-enriched kinase|cyclin-dependent kinase 5/p35-regulated kinase|kinase/phosphatase/inhibitor 2|protein phosphatase 1, regulatory subunit 100|serine/threonine-protein kinase KPI-2	7q21.3	7	NC_000007.14	98106862	98209638	plus	14	610989
9606	Homo sapiens	5806	0	live	PTX3	TNFAIP5, TSG-14	pentraxin 3	pentraxin-related protein PTX3|TNF alpha-induced protein 5|long pentraxin 3|tumor necrosis factor alpha-induced protein 5|tumor necrosis factor-inducible gene 14 protein|tumor necrosis factor-inducible protein TSG-14	3q25.32	3	NC_000003.12	157436850	157443633	plus	3	602492
9606	Homo sapiens	3685	0	live	ITGAV	CD51, MSK8, VNRA, VTNR	integrin subunit alpha V	integrin alpha-V|antigen identified by monoclonal antibody L230|integrin alphaVbeta3|integrin, alpha V (vitronectin receptor, alpha polypeptide, antigen CD51)|vitronectin receptor subunit alpha	2q32.1	2	NC_000002.12	186590056	186680902	plus	31	193210
9606	Homo sapiens	31	0	live	ACACA	ACACD, ACC, ACC1, ACCA, ACACA	acetyl-CoA carboxylase alpha	acetyl-CoA carboxylase 1|ACC-alpha|acetyl-Coenzyme A carboxylase alpha	17q12	17	NC_000017.11	37084992	37406836	minus	63	200350
9606	Homo sapiens	133482	0	live	SLCO6A1	CT48, GST, OATP-I, OATP6A1, OATPY	solute carrier organic anion transporter family member 6A1	solute carrier organic anion transporter family member 6A1|cancer/testis antigen 48|gonad-specific transporter|organic anion-transporting polypeptide I|solute carrier family 21 member 19|testicular tissue protein Li 174|testis-specific organic anion transporter	5q21.1	5	NC_000005.10	102371774	102502213	minus	14	613365
9606	Homo sapiens	4049	0	live	LTA	LT, TNFB, TNFSF1, TNLG1E	lymphotoxin alpha	lymphotoxin-alpha|LT-alpha|TNF superfamily, member 1|TNF-beta|truncated lymphotoxin alpha|tumor necrosis factor beta|tumor necrosis factor ligand 1E|tumor necrosis factor ligand superfamily member 1	6p21.33	6	NC_000006.12	31560550	31574324	plus	8	153440
9606	Homo sapiens	59340	0	live	HRH4	AXOR35, BG26, GPCR105, GPRv53, H4, H4R, HH4R	histamine receptor H4	histamine H4 receptor|G-protein coupled receptor 105|SP9144|pfi-013	18q11.2	18	NC_000018.10	24460637	24479974	plus	3	606792
9606	Homo sapiens	146183	0	live	OTOA	CT108, DFNB22	otoancorin	otoancorin|cancer/testis antigen 108	16p12.2	16	NC_000016.10	21663968	21762625	plus	33	607038
9606	Homo sapiens	441519	0	live	CT45A3	CT45-3, CT45-4, CT45.3, CT45.4, CT45A4	cancer/testis antigen family 45 member A3	cancer/testis antigen family 45 member A3|cancer/testis antigen 45-3|cancer/testis antigen 45-4|cancer/testis antigen 45A3|cancer/testis antigen 45A4|cancer/testis antigen CT45-3|cancer/testis antigen family 45 member A4	Xq26.3	X	NC_000023.11	135760044	135768191	minus	6	300794
9606	Homo sapiens	2056	0	live	EPO	DBAL, ECYT5, EP, MVCD2	erythropoietin	erythropoietin|epoetin	7q22.1	7	NC_000007.14	100720468	100723700	plus	5	133170
9606	Homo sapiens	3043	0	live	HBB	CD113t-C, ECYT6, beta-globin	hemoglobin subunit beta	hemoglobin subunit beta|beta globin chain|hemoglobin beta subunit|hemoglobin, beta	11p15.4	11	NC_000011.10	5225464	5227071	minus	3	141900
9606	Homo sapiens	100329169	0	live	CRCS9		colorectal cancer, susceptibility to, 9		16q22.1	16						612590
9606	Homo sapiens	100271692	0	live	CRCS11		Colorectal cancer, susceptibility to, 11		20p12.3	20						612592
9606	Homo sapiens	100188887	0	live	CRCS5		Colorectal cancer, susceptibility to, 5		10p14	10						612230
9606	Homo sapiens	100187710	0	live	CRCS6		colorectal cancer, susceptibility to, 6		8q23	8						612231
9606	Homo sapiens	100682395	0	live	LNCR5		Lung cancer susceptibility 5		3q28	3						614210
9606	Homo sapiens	100271693	0	live	LNCR4		Lung cancer susceptibility 4		6p21.33	6						612593
9606	Homo sapiens	100271691	0	live	CRCS10		Colorectal cancer, susceptibility to, 10									612591
9606	Homo sapiens	100271690	0	live	CRCS8		Colorectal cancer, susceptibility to, 8		14q22.2	14						612589
9606	Homo sapiens	100271687	0	live	LNCR3		Lung cancer susceptibility 3		5p15.33	5						612571
9606	Homo sapiens	100188868	0	live	HPC15		Prostate cancer, hereditary, 15		19q13.4	19						611959
9606	Homo sapiens	100188826	0	live	HPC9		Prostate cancer, hereditary, 9		17q21-q22	17						610997
9606	Homo sapiens	100188809	0	live	HPC7		Prostate cancer, hereditary, 7		15q12	15						610321
9606	Homo sapiens	100188789	0	live	HPC6		Prostate cancer, susceptibility to		22q12.3	22						609558
9606	Homo sapiens	100188769	0	live	HPCX2		Prostate cancer, hereditary, X-linked 2		Xp11.22	X						300704
9606	Homo sapiens	100187711	0	live	CRCS7		colorectal cancer, susceptibility to, 7		11q23	11						612232
9606	Homo sapiens	93273	0	live	LEMD1	CT50, LEMP-1	LEM domain containing 1	LEM domain-containing protein 1|LEM domain protein 1|cancer/testis antigen 50	1q32.1	1	NC_000001.11	205381378	205449956	minus	11	610480
9606	Homo sapiens	158521	0	live	FMR1NB	CT37, NY-SAR-35, NYSAR35	FMR1 neighbor	fragile X mental retardation 1 neighbor protein|cancer/testis antigen 37|sarcoma antigen NY-SAR-35	Xq27.3-q28	X	NC_000023.11	147981337	148026665	plus	6
9606	Homo sapiens	53940	0	live	FTHL17	CT38	ferritin heavy chain like 17	ferritin heavy polypeptide-like 17|cancer/testis antigen 38|epididymis secretory sperm binding protein|ferritin, heavy polypeptide-like 17	Xp21.2	X	NC_000023.11	31071233	31072041	minus	1	300308
9606	Homo sapiens	6927	0	live	HNF1A	HNF-1A, HNF1, HNF4A, IDDM20, LFB1, MODY3, TCF-1, TCF1	HNF1 homeobox A	hepatocyte nuclear factor 1-alpha|HNF-1-alpha|albumin proximal factor|hepatic nuclear factor 1|interferon production regulator factor|liver-specific transcription factor LF-B1|transcription factor 1, hepatic|truncated hepatocyte nuclear factor 1 alpha	12q24.31	12	NC_000012.12	120977683	121002512	plus	9	142410
9606	Homo sapiens	2688	0	live	GH1	GH, GH-N, GHB5, GHN, IGHD1A, IGHD1B, IGHD2, hGH-N	growth hormone 1	somatotropin|growth hormone B5|pituitary growth hormone	17q23.3	17	NC_000017.11	63917203	63918839	minus	5	139250
9606	Homo sapiens	6478	0	live	SIAH2	hSiah2	siah E3 ubiquitin protein ligase 2	E3 ubiquitin-protein ligase SIAH2|RING-type E3 ubiquitin transferase SIAH2|seven in absentia homolog 2|siah-2	3q25.1	3	NC_000003.12	150741125	150763169	minus	2	602213
9606	Homo sapiens	8028	0	live	MLLT10	AF10	MLLT10 histone lysine methyltransferase DOT1L cofactor	protein AF-10|ALL1-fused gene from chromosome 10 protein|myeloid/lymphoid or mixed-lineage leukemia (trithorax homolog, Drosophila); translocated to, 10|myeloid/lymphoid or mixed-lineage leukemia; translocated to, 10|type I AF10 protein|type III AF10 protein|type IV AF10 protein	10p12.31	10	NC_000010.11	21524616	21743630	plus	39	602409
9606	Homo sapiens	5371	0	live	PML	MYL, PP8675, RNF71, TRIM19	promyelocytic leukemia	protein PML|PML/RARA fusion|RING finger protein 71|probable transcription factor PML|promyelocytic leukemia protein|promyelocytic leukemia, inducer of|tripartite motif protein TRIM19|tripartite motif-containing protein 19	15q24.1	15	NC_000015.10	73994673	74047827	plus	10	102578
9606	Homo sapiens	2034	0	live	EPAS1	ECYT4, HIF2A, HLF, MOP2, PASD2, bHLHe73	endothelial PAS domain protein 1	endothelial PAS domain-containing protein 1|EPAS-1|HIF-1-alpha-like factor|HIF-1alpha-like factor|HIF-2-alpha|HIF2-alpha|PAS domain-containing protein 2|basic-helix-loop-helix-PAS protein MOP2|class E basic helix-loop-helix protein 73|hypoxia-inducible factor 2 alpha|member of PAS protein 2	2p21	2	NC_000002.12	46297407	46386697	plus	17	603349
9606	Homo sapiens	5156	0	live	PDGFRA	CD140A, PDGFR-2, PDGFR2	platelet derived growth factor receptor alpha	platelet-derived growth factor receptor alpha|CD140 antigen-like family member A|CD140a antigen|PDGF-R-alpha|alpha-type platelet-derived growth factor receptor|platelet-derived growth factor receptor 2|platelet-derived growth factor receptor, alpha polypeptide	4q12	4	NC_000004.12	54229127	54298247	plus	28	173490
9606	Homo sapiens	5894	0	live	RAF1	CMD1NN, CRAF, NS5, Raf-1, c-Raf	Raf-1 proto-oncogene, serine/threonine kinase	RAF proto-oncogene serine/threonine-protein kinase|C-Raf proto-oncogene, serine/threonine kinase|Oncogene RAF1|proto-oncogene c-RAF|raf proto-oncogene serine/threonine protein kinase|v-raf-1 murine leukemia viral oncogene homolog 1|v-raf-1 murine leukemia viral oncogene-like protein 1	3p25.2	3	NC_000003.12	12583601	12664201	minus	22	164760
9606	Homo sapiens	3172	0	live	HNF4A	FRTS4, HNF4, HNF4a7, HNF4a8, HNF4a9, HNF4alpha, MODY, MODY1, NR2A1, NR2A21, TCF, TCF14	hepatocyte nuclear factor 4 alpha	hepatocyte nuclear factor 4-alpha|HNF4alpha10/11/12|TCF-14|hepatic nuclear factor 4 alpha|nuclear receptor subfamily 2 group A member 1|transcription factor 14|transcription factor HNF-4	20q13.12	20	NC_000020.11	44355699	44434596	plus	13	600281
9606	Homo sapiens	406937	0	live	MIR145	MIRN145, miR-145, miRNA145	microRNA 145	hsa-mir-145	5q32	5	NC_000005.10	149430646	149430733	plus	1	611795
9606	Homo sapiens	22943	0	live	DKK1	DKK-1, SK	dickkopf WNT signaling pathway inhibitor 1	dickkopf-related protein 1|dickkopf 1 homolog|dickkopf-1 like|dickkopf-like protein 1	10q21.1	10	NC_000010.11	52314281	52317657	plus	4	605189
9606	Homo sapiens	4893	0	live	NRAS	ALPS4, CMNS, N-ras, NCMS1, NS6, NRAS	NRAS proto-oncogene, GTPase	GTPase NRas|N-ras protein part 4|neuroblastoma RAS viral (v-ras) oncogene homolog|neuroblastoma RAS viral oncogene homolog|transforming protein N-Ras|v-ras neuroblastoma RAS viral oncogene homolog	1p13.2	1	NC_000001.11	114704469	114716771	minus	7	164790
9606	Homo sapiens	8678	0	live	BECN1	ATG6, VPS30, beclin1	beclin 1	beclin-1|ATG6 autophagy related 6 homolog|beclin 1 (coiled-coil, moesin-like BCL2-interacting protein)|beclin 1, autophagy related|coiled-coil myosin-like BCL2-interacting protein|testis secretory sperm-binding protein Li 215e	17q21.31	17	NC_000017.11	42810132	42824316	minus	13	604378
9606	Homo sapiens	6794	0	live	STK11	LKB1, PJS, hLKB1	serine/threonine kinase 11	serine/threonine-protein kinase STK11|liver kinase B1|polarization-related protein LKB1|renal carcinoma antigen NY-REN-19|serine/threonine-protein kinase 11|serine/threonine-protein kinase LKB1	19p13.3	19	NC_000019.10	1205778	1228431	plus	10	602216
9606	Homo sapiens	4792	0	live	NFKBIA	EDAID2, IKBA, MAD-3, NFKBI	NFKB inhibitor alpha	NF-kappa-B inhibitor alpha|I-kappa-B-alpha|IkappaBalpha|ikB-alpha|major histocompatibility complex enhancer-binding protein MAD3|nuclear factor of kappa light chain gene enhancer in B-cells|nuclear factor of kappa light polypeptide gene enhancer in B-cells inhibitor, alpha	14q13.2	14	NC_000014.9	35401513	35404749	minus	6	164008
9606	Homo sapiens	2539	0	live	G6PD	G6PD1	glucose-6-phosphate dehydrogenase	glucose-6-phosphate 1-dehydrogenase|epididymis secretory sperm binding protein	Xq28	X	NC_000023.11	154531390	154547569	minus	14	305900
9606	Homo sapiens	6615	0	live	SNAI1	SLUGH2, SNA, SNAH, SNAIL, SNAIL1, dJ710H13.1	snail family transcriptional repressor 1	zinc finger protein SNAI1|protein sna|protein snail homolog 1|snail 1 homolog|snail 1 zinc finger protein|snail family zinc finger 1|snail homolog 1	20q13.13	20	NC_000020.11	49982980	49988886	plus	3	604238
9606	Homo sapiens	3600	0	live	IL15	IL-15	interleukin 15	interleukin-15	4q31.21	4	NC_000004.12	141636583	141733987	plus	10	600554
9606	Homo sapiens	5087	0	live	PBX1	CAKUHED	PBX homeobox 1	pre-B-cell leukemia transcription factor 1|homeobox protein PBX1|homeobox protein PRL|pre-B-cell leukemia homeobox 1	1q23.3	1	NC_000001.11	164559184	164886047	plus	11	176310
9606	Homo sapiens	1050	0	live	CEBPA	C/EBP-alpha, CEBP	CCAAT enhancer binding protein alpha	CCAAT/enhancer-binding protein alpha|CCAAT/enhancer binding protein (C/EBP), alpha	19q13.11	19	NC_000019.10	33299934	33302564	minus	1	116897
9606	Homo sapiens	150763	0	live	GPAT2	CT123	glycerol-3-phosphate acyltransferase 2, mitochondrial	glycerol-3-phosphate acyltransferase 2, mitochondrial|cancer/testis antigen 123	2q11.2	2	NC_000002.12	96021946	96035974	minus	23	616431
9606	Homo sapiens	5591	0	live	PRKDC	DNA-PKC, DNA-PKcs, DNAPK, DNAPKc, DNPK1, HYRC, HYRC1, IMD26, XRCC7, p350	protein kinase, DNA-activated, catalytic subunit	DNA-dependent protein kinase catalytic subunit|DNA-PK catalytic subunit|hyper-radiosensitivity of murine scid mutation, complementing 1|p460|protein kinase, DNA-activated, catalytic polypeptide	8q11.21	8	NC_000008.11	47773111	47960136	minus	86	600899
9606	Homo sapiens	3240	0	live	HP	BP2ALPHA2, HPA1S, HP	haptoglobin	haptoglobin|binding peptide|haptoglobin alpha(1S)-beta|haptoglobin alpha(2FS)-beta|haptoglobin, alpha polypeptide|haptoglobin, beta polypeptide|zonulin	16q22.2	16	NC_000016.10	72054505	72061056	plus	7	140100
9606	Homo sapiens	55181	0	live	SMG8	C17orf71	SMG8 nonsense mediated mRNA decay factor	protein SMG8|amplified in breast cancer gene 2 protein|protein smg-8 homolog|smg-8 homolog, nonsense mediated mRNA decay factor	17q22	17	NC_000017.11	59210010	59215250	plus	4	613175
9606	Homo sapiens	9518	0	live	GDF15	GDF-15, MIC-1, MIC1, NAG-1, PDF, PLAB, PTGFB	growth differentiation factor 15	growth/differentiation factor 15|NRG-1|NSAID (nonsteroidal anti-inflammatory drug)-activated protein 1|NSAID-activated gene 1 protein|NSAID-regulated gene 1 protein|PTGF-beta|macrophage inhibitory cytokine 1|non-steroidal anti-inflammatory drug-activated gene-1|placental TGF-beta|placental bone morphogenetic protein|prostate differentiation factor	19p13.11	19	NC_000019.10	18382170	18389176	plus	3	605312
9606	Homo sapiens	3689	0	live	ITGB2	CD18, LAD, LCAMB, LFA-1, MAC-1, MF17, MFI7	integrin subunit beta 2	integrin beta-2|cell surface adhesion glycoprotein (LFA-1/CR3/P150,959 beta subunit precursor)|complement component 3 receptor 3 and 4 subunit|complement receptor C3 beta-subunit|integrin beta chain, beta 2|integrin, beta 2 (complement component 3 receptor 3 and 4 subunit)|leukocyte cell adhesion molecule CD18|leukocyte-associated antigens CD18/11A, CD18/11B, CD18/11C	21q22.3	21	NC_000021.9	44885949	44928815	minus	17	600065
9606	Homo sapiens	4023	0	live	LPL	HDLCQ11, LIPD	lipoprotein lipase	lipoprotein lipase	8p21.3	8	NC_000008.11	19939253	19967259	plus	10	609708
9606	Homo sapiens	4013	0	live	VWA5A	BCSC-1, BCSC1, LOH11CR2A	von Willebrand factor A domain containing 5A	von Willebrand factor A domain-containing protein 5A|breast cancer suppressor candidate 1|loss of heterozygosity 11 chromosomal region 2 gene A protein|loss of heterozygosity, 11, chromosomal region 2, gene A|ortholog of mouse AW551984	11q24.2	11	NC_000011.10	124115404	124147721	plus	19	602929
9606	Homo sapiens	6280	0	live	S100A9	60B8AG, CAGB, CFAG, CGLB, L1AG, LIAG, MAC387, MIF, MRP14, NIF, P14	S100 calcium binding protein A9	protein S100-A9|MRP-14|calgranulin B|calprotectin L1H subunit|leukocyte L1 complex heavy chain|migration inhibitory factor-related protein 14	1q21.3	1	NC_000001.11	153357854	153361023	plus	3	123886
9606	Homo sapiens	268	0	live	AMH	MIF, MIS	anti-Mullerian hormone	muellerian-inhibiting factor|Mullerian inhibiting factor|Mullerian inhibiting substance|anti-Muellerian hormone|muellerian-inhibiting substance	19p13.3	19	NC_000019.10	2249323	2252073	plus	5	600957
9606	Homo sapiens	285	0	live	ANGPT2	AGPT2, ANG2	angiopoietin 2	angiopoietin-2|ANG-2|Tie2-ligand|angiopoietin-2B|angiopoietin-2a	8p23.1	8	NC_000008.11	6499632	6563420	minus	9	601922
9606	Homo sapiens	727837	0	live	SSX2B	CT5.2, CT5.2b, HOM-MEL-40, SSX	SSX family member 2B	protein SSX2|cancer/testis antigen 5.2|cancer/testis antigen family 5, member 2b|synovial sarcoma, X breakpoint 2B|tumor antigen HOM-MEL-40	Xp11.22	X	NC_000023.11	52751252	52761536	plus	9
9606	Homo sapiens	3559	0	live	IL2RA	CD25, IDDM10, IL2R, IMD41, TCGFR, p55	interleukin 2 receptor subunit alpha	interleukin-2 receptor subunit alpha|IL-2 receptor subunit alpha|IL-2R subunit alpha|TAC antigen|interleukin 2 receptor, alpha	10p15.1	10	NC_000010.11	6010689	6062367	minus	8	147730
9606	Homo sapiens	3303	0	live	HSPA1A	HEL-S-103, HSP70-1, HSP70-1A, HSP70-2, HSP70.1, HSP70.2, HSP70I, HSP72, HSPA1	heat shock protein family A (Hsp70) member 1A	heat shock 70 kDa protein 1A|HSP70-1/HSP70-2|HSP70.1/HSP70.2|Heat shock 70 kDa protein 1B|Heat shock 70 kDa protein 2|dnaK-type molecular chaperone HSP70-1|epididymis secretory protein Li 103|epididymis secretory sperm binding protein|heat shock 70 kDa protein 1|heat shock 70 kDa protein 1/2|heat shock 70 kDa protein 1A/1B|heat shock 70kD protein 1A|heat shock 70kDa protein 1A|heat shock-induced …	6p21.33	6	NC_000006.12	31815543	31817942	plus	1	140550
9606	Homo sapiens	7133	0	live	TNFRSF1B	CD120b, TBPII, TNF-R-II, TNF-R75, TNFBR, TNFR1B, TNFR2, TNFR80, p75, p75TNFR	TNF receptor superfamily member 1B	tumor necrosis factor receptor superfamily member 1B|TNF-R2|TNF-RII|p75 TNF receptor|p80 TNF-alpha receptor|soluble TNFR1B variant 1|tumor necrosis factor beta receptor|tumor necrosis factor binding protein 2|tumor necrosis factor receptor 2|tumor necrosis factor receptor type II	1p36.22	1	NC_000001.11	12166948	12209222	plus	11	191191
9606	Homo sapiens	567	0	live	B2M	IMD43	beta-2-microglobulin	beta-2-microglobulin|beta chain of MHC class I molecules|beta-2-microglobin	15q21.1	15	NC_000015.10	44711492	44718877	plus	3	109700
9606	Homo sapiens	3782	0	live	KCNN3	KCa2.3, SK3, SKCA3, ZLS3, hSK3	potassium calcium-activated channel subfamily N member 3	small conductance calcium-activated potassium channel protein 3|SKCa 3|potassium channel, calcium activated intermediate/small conductance subfamily N alpha, member 3|potassium intermediate/small conductance calcium-activated channel, subfamily N, member 3|small conductance calcium-activated potassium channel 3	1q21.3	1	NC_000001.11	154697455	154870281	minus	11	602983
9606	Homo sapiens	5566	0	live	PRKACA	PKACA, PPNAD4	protein kinase cAMP-activated catalytic subunit alpha	cAMP-dependent protein kinase catalytic subunit alpha|PKA C-alpha|protein kinase A catalytic subunit|protein kinase, cAMP-dependent, alpha catalytic subunit|protein kinase, cAMP-dependent, catalytic, alpha	19p13.12	19	NC_000019.10	14091688	14117762	minus	12	601639
9606	Homo sapiens	266740	0	live	MAGEA2B	CT1.2, MAGE2	MAGE family member A2B	melanoma-associated antigen 2|MAGE-2 antigen|cancer/testis antigen 1.2|melanoma antigen 2|melanoma antigen family A, 2B|melanoma antigen family A2B|melanoma antigen, family A, 2, copy b	Xq28	X	NC_000023.11	152714528	152718607	plus	7	300549
9606	Homo sapiens	302	0	live	ANXA2	ANX2, ANX2L4, CAL1H, HEL-S-270, LIP2, LPC2, LPC2D, P36, PAP-IV	annexin A2	annexin A2|annexin II|annexin-2|calpactin I heavy chain|calpactin I heavy polypeptide|calpactin-1 heavy chain|chromobindin 8|epididymis secretory protein Li 270|epididymis secretory sperm binding protein|lipocortin II|placental anticoagulant protein IV|protein I	15q22.2	15	NC_000015.10	60347151	60398025	minus	16	151740
9606	Homo sapiens	7424	0	live	VEGFC	Flt4-L, LMPH1D, LMPHM4, VRP	vascular endothelial growth factor C	vascular endothelial growth factor C|FLT4 ligand DHM|vascular endothelial growth factor-related protein	4q34.3	4	NC_000004.12	176683538	176792922	minus	7	601528
9606	Homo sapiens	3625	0	live	INHBB		inhibin subunit beta B	inhibin beta B chain|Inhibin, beta-2|activin AB beta polypeptide|activin beta-B chain|inhibin beta B subunit	2q14.2	2	NC_000002.12	120346136	120351803	plus	2	147390
9606	Homo sapiens	387119	0	live	CEP85L	C6orf204, NY-BR-15, bA57K17.2	centrosomal protein 85 like	centrosomal protein of 85 kDa-like|centrosomal protein 85kDa-like|serologically defined breast cancer antigen NY-BR-15	6q22.31	6	NC_000006.12	118460772	118710101	minus	19
9606	Homo sapiens	7472	0	live	WNT2	INT1L1, IRP	Wnt family member 2	protein Wnt-2|Int-1-related protein|epididymis secretory sperm binding protein|int-1-like protein 1|secreted growth factor|wingless-type MMTV integration site family member 2	7q31.2	7	NC_000007.14	117275451	117323058	minus	5	147870
9606	Homo sapiens	6421	0	live	SFPQ	POMP100, PPP1R140, PSF	splicing factor proline and glutamine rich	splicing factor, proline- and glutamine-rich|100 kDa DNA-pairing protein|DNA-binding p52/p100 complex, 100 kDa subunit|PTB-associated splicing factor|epididymis secretory sperm binding protein|polypyrimidine tract binding protein associated|polypyrimidine tract-binding protein-associated splicing factor|protein phosphatase 1, regulatory subunit 140|splicing factor proline/glutamine rich (polypyri…	1p34.3	1	NC_000001.11	35176378	35193174	minus	13	605199
9606	Homo sapiens	3956	0	live	LGALS1	GAL1, GBP	galectin 1	galectin-1|14 kDa laminin-binding protein|14 kDa lectin|HBL|HLBP14|HPL|S-Lac lectin 1|beta-galactoside-binding lectin L-14-I|beta-galactoside-binding protein 14kDa|epididymis secretory sperm binding protein|gal-1|galaptin|lactose-binding lectin 1|lectin, galactoside-binding, soluble, 1|putative MAPK-activating protein PM12	22q13.1	22	NC_000022.11	37675636	37679802	plus	4	150570
9606	Homo sapiens	7153	0	live	TOP2A	TOP2, TP2A	DNA topoisomerase II alpha	DNA topoisomerase 2-alpha|DNA gyrase|DNA topoisomerase (ATP-hydrolyzing)|DNA topoisomerase II, 170 kD|DNA topoisomerase II, alpha isozyme|topoisomerase (DNA) II alpha 170kDa	17q21.2	17	NC_000017.11	40388525	40417902	minus	36	126430
9606	Homo sapiens	441521	0	live	CT45A5	CT45-3, CT45-4, CT45-6, CT45.5, CT455, CT45A3, CT45A4, CT45A6, CT45A7	cancer/testis antigen family 45 member A5	cancer/testis antigen family 45 member A5|Cancer/testis antigen 45-3|Cancer/testis antigen 45-4|Cancer/testis antigen 45-6|Cancer/testis antigen 45A3|Cancer/testis antigen 45A4|Cancer/testis antigen 45A6|Cancer/testis antigen 45A7|Cancer/testis antigen family 45 member A3|Cancer/testis antigen family 45 member A4|Cancer/testis antigen family 45 member A6|Cancer/testis antigen family 45 member A7|…	Xq26.3	X	NC_000023.11	135777130	135785514	minus	5	300796
9606	Homo sapiens	692094	0	live	MSMP	PSMP	microseminoprotein, prostate associated	prostate-associated microseminoprotein|PC3 prostate cancer cell-secreted microprotein	9p13.3	9	NC_000009.12	35752990	35754276	minus	3	612191
9606	Homo sapiens	728096	0	live	CT47A1	CT47.1	cancer/testis antigen family 47 member A1	; cancer/testis antigen 47A|cancer/testis CT47 family, member 1	Xq24	X	NC_000023.11	120982466	120985886	minus	4	300780
9606	Homo sapiens	728090	0	live	CT47A2	CT47.2	cancer/testis antigen family 47 member A2	; cancer/testis antigen 47A|cancer/testis CT47 family, member 2	Xq24	X	NC_000023.11	120977606	120981026	minus	4	300781
9606	Homo sapiens	728082	0	live	CT47A3	CT47.3	cancer/testis antigen family 47 member A3	; cancer/testis antigen 47A|cancer/testis CT47 family, member 3	Xq24	X	NC_000023.11	120972746	120976166	minus	4	300782
9606	Homo sapiens	728075	0	live	CT47A4	CT47.4	cancer/testis antigen family 47 member A4	; cancer/testis antigen 47A|cancer/testis CT47 family, member 4	Xq24	X	NC_000023.11	120967886	120971306	minus	4	300783
9606	Homo sapiens	728072	0	live	CT47A5	CT47.5	cancer/testis antigen family 47 member A5	; cancer/testis antigen 47A|CT47|cancer/testis CT47 family, member 5|cancer/testis antigen 47	Xq24	X	NC_000023.11	120963026	120966446	minus	4	300784
9606	Homo sapiens	728062	0	live	CT47A6	CT47.6	cancer/testis antigen family 47 member A6	; cancer/testis antigen 47A|cancer/testis CT47 family, member 6	Xq24	X	NC_000023.11	120958165	120961588	minus	4	300785
9606	Homo sapiens	728049	0	live	CT47A8	CT47.8	cancer/testis antigen family 47 member A8	; cancer/testis antigen 47A|cancer/testis CT47 family, member 8	Xq24	X	NC_000023.11	120948422	120951842	minus	4	300787
9606	Homo sapiens	728042	0	live	CT47A9	CT47.9	cancer/testis antigen family 47 member A9	; cancer/testis antigen 47A|cancer/testis CT47 family, member 9	Xq24	X	NC_000023.11	120943561	120946981	minus	4	300788
9606	Homo sapiens	728036	0	live	CT47A10	CT47, CT47.10	cancer/testis antigen family 47 member A10	; cancer/testis antigen 47A|cancer/testis CT47 family, member 10|cancer/testis antigen 47	Xq24	X	NC_000023.11	120938701	120942121	minus	4	300789
9606	Homo sapiens	653282	0	live	CT47A7	CT47.7	cancer/testis antigen family 47 member A7	; cancer/testis antigen 47A|cancer/testis CT47 family, member 7	Xq24	X	NC_000023.11	120953282	120956600	minus	4	300786
9606	Homo sapiens	8631	0	live	SKAP1	HEL-S-81p, SCAP1, SKAP55	src kinase associated phosphoprotein 1	src kinase-associated phosphoprotein 1|SKAP-55|epididymis secretory sperm binding protein Li 81p|pp55|src family-associated phosphoprotein 1|src kinase-associated phosphoprotein of 55 kDa	17q21.32	17	NC_000017.11	48133438	48430250	minus	18	604969
9606	Homo sapiens	23585	0	live	TMEM50A	IFNRC, SMP1	transmembrane protein 50A	transmembrane protein 50A|cervical cancer oncogene 9|small membrane protein 1	1p36.11	1	NC_000001.11	25338334	25362361	plus	7	605348
9606	Homo sapiens	548313	0	live	SSX4B	CT5.4	SSX family member 4B	protein SSX4|cancer/testis antigen 5.4|synovial sarcoma, X breakpoint 4B	Xp11.23	X	NC_000023.11	48402082	48411910	minus	9
9606	Homo sapiens	8614	0	live	STC2	STC-2, STCRP	stanniocalcin 2	stanniocalcin-2|STC-related protein|stanniocalcin-related protein	5q35.2	5	NC_000005.10	173314723	173329503	minus	4	603665
9606	Homo sapiens	2069	0	live	EREG	EPR, ER, Ep	epiregulin	proepiregulin	4q13.3	4	NC_000004.12	74365145	74388749	plus	5	602061
9606	Homo sapiens	57817	0	live	HAMP	HEPC, HFE2B, LEAP1, PLTR	hepcidin antimicrobial peptide	hepcidin|hepcidin preproprotein|liver-expressed antimicrobial peptide 1|putative liver tumor regressor	19q13.12	19	NC_000019.10	35282528	35285143	plus	3	606464
9606	Homo sapiens	1994	0	live	ELAVL1	ELAV1, HUR, Hua, MelG	ELAV like RNA binding protein 1	ELAV-like protein 1|ELAV (embryonic lethal, abnormal vision, Drosophila)-like 1 (Hu antigen R)|Hu antigen R|embryonic lethal, abnormal vision, drosophila, homolog-like 1|hu-antigen R	19p13.2	19	NC_000019.10	7958573	8005641	minus	7	603466
9606	Homo sapiens	5159	0	live	PDGFRB	CD140B, IBGC4, IMF1, JTK12, KOGS, PDGFR, PDGFR-1, PDGFR1, PENTT	platelet derived growth factor receptor beta	platelet-derived growth factor receptor beta|Activated tyrosine kinase PDGFRB|CD140 antigen-like family member B|NDEL1-PDGFRB|PDGF-R-beta|PDGFR-beta|beta-type platelet-derived growth factor receptor|platelet-derived growth factor receptor 1|platelet-derived growth factor receptor, beta polypeptide	5q32	5	NC_000005.10	150113839	150155845	minus	24	173410
9606	Homo sapiens	4854	0	live	NOTCH3	CADASIL, CADASIL1, CASIL, IMF2, LMNS	notch receptor 3	neurogenic locus notch homolog protein 3|Notch homolog 3|notch 3	19p13.12	19	NC_000019.10	15159038	15200995	minus	33	600276
9606	Homo sapiens	133	0	live	ADM	AM, PAMP	adrenomedullin	ADM|preproadrenomedullin|proadrenomedullin N-20 terminal peptide	11p15.4	11	NC_000011.10	10305073	10307397	plus	4	103275
9606	Homo sapiens	2214	0	live	FCGR3A	CD16, CD16A, FCG3, FCGR3, FCGRIII, FCR-10, FCRIII, FCRIIIA, IGFR3, IMD20	Fc fragment of IgG receptor IIIa	low affinity immunoglobulin gamma Fc region receptor III-A|CD16a antigen|Fc fragment of IgG, low affinity III, receptor for (CD16)|Fc fragment of IgG, low affinity IIIa, receptor (CD16a)|Fc gamma receptor III-A|Fc-gamma RIII-alpha|Fc-gamma receptor III-2 (CD 16)|Fc-gamma receptor IIIb (CD16)|FcgammaRIIIA|igG Fc receptor III-2|immunoglobulin G Fc receptor III|low affinity immunoglobulin gamma rece…	1q23.3	1	NC_000001.11	161541759	161550737	minus	7	146740
9606	Homo sapiens	2534	0	live	FYN	SLK, SYN, p59-FYN	FYN proto-oncogene, Src family tyrosine kinase	tyrosine-protein kinase Fyn|FYN oncogene related to SRC, FGR, YES|OKT3-induced calcium influx regulator|c-syn protooncogene|proto-oncogene Syn|proto-oncogene c-Fyn|src-like kinase|src/yes-related novel|tyrosine kinase p59fyn(T)	6q21	6	NC_000006.12	111660332	111873452	minus	19	137025
9606	Homo sapiens	6498	0	live	SKIL	SNO, SnoA, SnoI, SnoN	SKI like proto-oncogene	ski-like protein|SKI-like oncogene|ski-related oncogene snoN	3q26.2	3	NC_000003.12	170357678	170396849	plus	9	165340
9606	Homo sapiens	1111	0	live	CHEK1	CHK1	checkpoint kinase 1	serine/threonine-protein kinase Chk1|CHK1 checkpoint homolog|Checkpoint, S. pombe, homolog of, 1|Chk1-S|cell cycle checkpoint kinase	11q24.2	11	NC_000011.10	125624910	125676256	plus	15	603078
9606	Homo sapiens	128602	0	live	C20orf85	LLC1, bA196N14.1	chromosome 20 open reading frame 85	; uncharacterized protein C20orf85|low in lung cancer 1	20q13.32	20	NC_000020.11	58150902	58161150	plus	4
9606	Homo sapiens	729230	0	live	CCR2	CC-CKR-2, CCR-2A, CCR2B, CD192, CKR2, CKR2A, CKR2B, CMKBR2, MCP-1-R, CCR2	C-C motif chemokine receptor 2	C-C chemokine receptor type 2|MCP-1 receptor|chemokine (C-C motif) receptor 2|monocyte chemoattractant protein 1 receptor|monocyte chemotactic protein 1 receptor	3p21.31	3	NC_000003.12	46353744	46360940	plus	4	601267
9606	Homo sapiens	221400	0	live	TDRD6	CT41.2, NY-CO-45, SPATA36, TDR2, bA446F17.4	tudor domain containing 6	tudor domain-containing protein 6|antigen NY-CO-45|cancer/testis antigen 41.2|spermatogenesis associated 36	6p12.3	6	NC_000006.12	46680268	46704319	plus	5	611200
9606	Homo sapiens	2065	0	live	ERBB3	ErbB-3, FERLK, HER3, LCCS2, MDA-BF-1, c-erbB-3, c-erbB3, erbB3-S, p180-ErbB3, p45-sErbB3, p85-sErbB3	erb-b2 receptor tyrosine kinase 3	receptor tyrosine-protein kinase erbB-3|human epidermal growth factor receptor 3|proto-oncogene-like protein c-ErbB-3|tyrosine kinase-type cell surface receptor HER3|v-erb-b2 avian erythroblastic leukemia viral oncogene homolog 3	12q13.2	12	NC_000012.12	56080108	56103505	plus	28	190151
9606	Homo sapiens	4613	0	live	MYCN	MODED, N-myc, NMYC, ODED, bHLHe37	MYCN proto-oncogene, bHLH transcription factor	N-myc proto-oncogene protein|class E basic helix-loop-helix protein 37|neuroblastoma MYC oncogene|neuroblastoma-derived v-myc avian myelocytomatosis viral related oncogene|oncogene NMYC|v-myc avian myelocytomatosis viral oncogene neuroblastoma derived homolog	2p24.3	2	NC_000002.12	15940550	15947004	plus	3	164840
9606	Homo sapiens	1958	0	live	EGR1	AT225, G0S30, KROX-24, NGFI-A, TIS8, ZIF-268, ZNF225	early growth response 1	early growth response protein 1|EGR-1|nerve growth factor-induced protein A|transcription factor ETR103|transcription factor Zif268|zinc finger protein 225|zinc finger protein Krox-24	5q31.2	5	NC_000005.10	138465479	138469303	plus	2	128990
[truncated: 8,194 more rows]

## Sheet: Metabolism-associated genes
tax_id	Org_name	GeneID	CurrentID	Status	Symbol	Aliases	description	other_designations	map_location	chromosome	genomic_nucleotide_accession.version	start_position_on_the_genomic_accession	end_position_on_the_genomic_accession	orientation	exon_count	OMIM
[truncated: 2,307 more rows]

[truncated: 2 more sheets: Signaling-associated genes, Transcription-associated genes]
